# Supplementary material for: Sparse Representation for Different Animal Vertebra Classification along the Fixation Trajectory of Pedicle Screw
Source: Hindawi journal article supplement (doi:10.1155/2020/2521696), 2020-01-20
Supplement: f1 [file 2521696.f1.zip]

Archive with 3 entries (3 files):
- 2521696.f1/1A+1B.pdf
- 2521696.f1/2A+2B.pdf
- 2521696.f1/3A+3B.pdf
