# Supplementary material for: Sparse Representation for Different Animal Vertebra Classification along the Fixation Trajectory of Pedicle Screw
Source: Hindawi journal article supplement (doi:10.1155/2020/2521696), 2020-01-20
Supplement: f1 [file 2521696.f1.zip › 2521696.f1/1A+1B.pdf]

|        |     |     |     |     |     |     |     |     |     |        |      |     |     |     |     |     |     |     |      |
|--------|-----|-----|-----|-----|-----|-----|-----|-----|-----|--------|------|-----|-----|-----|-----|-----|-----|-----|------|
| 339.99 | 0   | 0   | 0   | 0   | 0   | 0   | 0   | 0   | 0   | 702.84 | 1144 | 756 | 927 | 749 | 775 | 712 | 933 | 897 | 1254 |
| 340.36 | 113 | 151 | 154 | 156 | 108 | 106 | 105 | 112 | 136 | 703.18 | 1181 | 774 | 928 | 746 | 768 | 734 | 941 | 918 | 1277 |
| 340.73 | 115 | 153 | 158 | 160 | 110 | 107 | 105 | 114 | 140 | 703.51 | 1160 | 770 | 927 | 761 | 770 | 722 | 930 | 900 | 1262 |
| 341.1  | 115 | 155 | 157 | 158 | 111 | 107 | 105 | 116 | 142 | 703.85 | 1167 | 748 | 925 | 753 | 769 | 719 | 925 | 905 | 1260 |
| 341.48 | 114 | 156 | 161 | 156 | 111 | 108 | 105 | 116 | 144 | 704.18 | 1169 | 759 | 908 | 748 | 758 | 711 | 907 | 891 | 1259 |
| 341.85 | 116 | 157 | 164 | 160 | 112 | 110 | 110 | 120 | 149 | 704.52 | 1172 | 757 | 916 | 754 | 756 | 718 | 923 | 912 | 1261 |
| 342.22 | 118 | 152 | 167 | 158 | 114 | 110 | 113 | 121 | 148 | 704.85 | 1160 | 759 | 917 | 751 | 772 | 722 | 912 | 904 | 1277 |
| 342.59 | 120 | 156 | 162 | 164 | 117 | 112 | 111 | 123 | 151 | 705.19 | 1177 | 761 | 920 | 753 | 765 | 714 | 915 | 901 | 1260 |
| 342.96 | 121 | 162 | 166 | 164 | 116 | 115 | 112 | 123 | 151 | 705.52 | 1161 | 750 | 904 | 756 | 752 | 704 | 909 | 898 | 1238 |
| 343.34 | 122 | 162 | 167 | 159 | 116 | 117 | 113 | 121 | 149 | 705.85 | 1146 | 764 | 910 | 748 | 765 | 707 | 911 | 896 | 1255 |
| 343.71 | 123 | 167 | 161 | 162 | 116 | 117 | 113 | 123 | 149 | 706.19 | 1143 | 749 | 908 | 748 | 781 | 709 | 907 | 879 | 1259 |
| 344.08 | 123 | 162 | 168 | 165 | 120 | 116 | 114 | 123 | 150 | 706.52 | 1135 | 749 | 912 | 726 | 765 | 716 | 918 | 895 | 1261 |
| 344.45 | 123 | 164 | 164 | 165 | 120 | 116 | 117 | 123 | 154 | 706.86 | 1139 | 752 | 918 | 749 | 755 | 704 | 916 | 861 | 1232 |
| 344.82 | 122 | 164 | 168 | 165 | 118 | 115 | 118 | 123 | 151 | 707.19 | 1157 | 754 | 914 | 741 | 750 | 701 | 918 | 874 | 1230 |
| 345.19 | 121 | 162 | 167 | 165 | 119 | 116 | 121 | 122 | 154 | 707.52 | 1143 | 736 | 902 | 729 | 745 | 687 | 897 | 878 | 1225 |
| 345.57 | 121 | 160 | 167 | 165 | 119 | 120 | 118 | 125 | 158 | 707.86 | 1129 | 746 | 901 | 736 | 752 | 696 | 904 | 871 | 1222 |
| 345.94 | 124 | 164 | 169 | 161 | 116 | 118 | 116 | 124 | 153 | 708.19 | 1107 | 748 | 893 | 739 | 736 | 700 | 890 | 881 | 1219 |
| 346.31 | 123 | 164 | 170 | 168 | 115 | 116 | 116 | 123 | 154 | 708.53 | 1142 | 743 | 884 | 721 | 756 | 700 | 884 | 887 | 1246 |
| 346.68 | 121 | 162 | 166 | 166 | 115 | 117 | 115 | 123 | 154 | 708.86 | 1124 | 736 | 897 | 735 | 757 | 690 | 880 | 867 | 1224 |
| 347.05 | 121 | 165 | 164 | 161 | 117 | 119 | 113 | 121 | 153 | 709.19 | 1112 | 727 | 880 | 742 | 739 | 703 | 902 | 883 | 1220 |
| 347.42 | 120 | 163 | 165 | 164 | 117 | 116 | 115 | 122 | 153 | 709.53 | 1124 | 728 | 903 | 730 | 750 | 698 | 908 | 867 | 1226 |
| 347.8  | 121 | 160 | 165 | 164 | 116 | 113 | 115 | 122 | 153 | 709.86 | 1113 | 731 | 888 | 722 | 736 | 698 | 887 | 877 | 1198 |
| 348.17 | 121 | 162 | 164 | 167 | 114 | 113 | 114 | 122 | 151 | 710.19 | 1110 | 745 | 903 | 725 | 739 | 682 | 881 | 867 | 1204 |
| 348.54 | 120 | 160 | 165 | 166 | 115 | 115 | 113 | 123 | 151 | 710.53 | 1126 | 728 | 883 | 728 | 737 | 693 | 886 | 875 | 1197 |
| 348.91 | 121 | 164 | 165 | 168 | 118 | 118 | 116 | 124 | 153 | 710.86 | 1129 | 735 | 884 | 730 | 736 | 692 | 886 | 873 | 1219 |
| 349.28 | 122 | 161 | 161 | 167 | 119 | 118 | 118 | 125 | 152 | 711.2  | 1121 | 724 | 888 | 730 | 738 | 687 | 859 | 855 | 1204 |
| 349.65 | 125 | 165 | 164 | 165 | 122 | 118 | 121 | 127 | 153 | 711.53 | 1105 | 725 | 867 | 723 | 728 | 678 | 867 | 855 | 1173 |
| 350.03 | 123 | 160 | 163 | 166 | 123 | 117 | 121 | 124 | 150 | 711.86 | 1116 | 722 | 882 | 713 | 728 | 676 | 871 | 853 | 1192 |
| 350.4  | 122 | 161 | 167 | 164 | 122 | 118 | 119 | 124 | 153 | 712.2  | 1109 | 727 | 876 | 727 | 733 | 685 | 880 | 853 | 1199 |
| 350.77 | 122 | 161 | 164 | 166 | 121 | 117 | 118 | 125 | 152 | 712.53 | 1104 | 728 | 861 | 716 | 718 | 685 | 873 | 841 | 1169 |
| 351.14 | 121 | 159 | 165 | 166 | 120 | 118 | 117 | 124 | 151 | 712.86 | 1103 | 719 | 870 | 715 | 736 | 682 | 872 | 848 | 1183 |
| 351.51 | 124 | 160 | 162 | 162 | 118 | 118 | 115 | 124 | 152 | 713.2  | 1076 | 718 | 878 | 714 | 723 | 678 | 864 | 845 | 1176 |
| 351.88 | 126 | 166 | 164 | 164 | 118 | 118 | 114 | 123 | 156 | 713.53 | 1094 | 723 | 855 | 728 | 713 | 675 | 853 | 840 | 1190 |
| 352.25 | 125 | 166 | 168 | 163 | 120 | 118 | 116 | 127 | 152 | 713.86 | 1096 | 723 | 860 | 718 | 730 | 675 | 873 | 856 | 1203 |
| 352.62 | 125 | 161 | 164 | 163 | 119 | 116 | 115 | 125 | 151 | 714.2  | 1085 | 715 | 869 | 727 | 729 | 682 | 860 | 854 | 1183 |
| 353    | 126 | 168 | 168 | 161 | 120 | 117 | 115 | 123 | 153 | 714.53 | 1076 | 712 | 850 | 694 | 702 | 672 | 843 | 832 | 1187 |
| 353.37 | 127 | 166 | 163 | 166 | 120 | 118 | 116 | 126 | 154 | 714.86 | 1082 | 705 | 858 | 717 | 719 | 665 | 863 | 849 | 1162 |
| 353.74 | 127 | 162 | 165 | 163 | 120 | 118 | 114 | 125 | 150 | 715.19 | 1094 | 710 | 847 | 709 | 728 | 685 | 853 | 837 | 1158 |
| 354.11 | 125 | 162 | 167 | 162 | 119 | 120 | 114 | 124 | 153 | 715.53 | 1073 | 706 | 875 | 710 | 707 | 675 | 852 | 846 | 1166 |
| 354.48 | 126 | 163 | 171 | 164 | 117 | 119 | 114 | 125 | 155 | 715.86 | 1087 | 705 | 829 | 713 | 718 | 672 | 839 | 839 | 1143 |
| 354.85 | 126 | 165 | 170 | 168 | 119 | 120 | 116 | 129 | 151 | 716.19 | 1084 | 695 | 859 | 716 | 714 | 671 | 854 | 840 | 1157 |
| 355.22 | 123 | 163 | 165 | 164 | 123 | 121 | 115 | 129 | 150 | 716.53 | 1073 | 711 | 848 | 696 | 712 | 663 | 853 | 816 | 1176 |
| 355.59 | 124 | 166 | 164 | 163 | 123 | 119 | 114 | 124 | 149 | 716.86 | 1068 | 698 | 848 | 716 | 705 | 651 | 837 | 825 | 1145 |
| 355.96 | 125 | 164 | 161 | 161 | 121 | 120 | 117 | 120 | 148 | 717.19 | 1066 | 698 | 849 | 696 | 707 | 663 | 840 | 814 | 1148 |
| 356.34 | 123 | 168 | 162 | 167 | 122 | 119 | 115 | 122 | 153 | 717.52 | 1078 | 698 | 847 | 690 | 708 | 665 | 841 | 828 | 1153 |
| 356.71 | 124 | 167 | 159 | 163 | 118 | 121 | 113 | 124 | 153 | 717.86 | 1061 | 707 | 846 | 700 | 718 | 676 | 829 | 808 | 1151 |
| 357.08 | 124 | 167 | 170 | 163 | 118 | 121 | 113 | 122 | 154 | 718.19 | 1064 | 704 | 843 | 709 | 704 | 659 | 834 | 811 | 1135 |
| 357.45 | 125 | 166 | 168 | 159 | 119 | 119 | 114 | 123 | 148 | 718.52 | 1047 | 686 | 851 | 703 | 707 | 663 | 828 | 826 | 1141 |
| 357.82 | 127 | 165 | 165 | 165 | 119 | 120 | 116 | 124 | 150 | 718.85 | 1056 | 703 | 845 | 708 | 700 | 650 | 833 | 806 | 1141 |
| 358.19 | 127 | 168 | 165 | 164 | 118 | 121 | 116 | 126 | 150 | 719.19 | 1035 | 684 | 842 | 693 | 682 | 652 | 820 | 791 | 1120 |
| 358.56 | 126 | 168 | 164 | 165 | 118 | 122 | 118 | 124 | 153 | 719.52 | 1044 | 691 | 826 | 703 | 699 | 652 | 832 | 805 | 1116 |
| 358.93 | 124 | 163 | 166 | 164 | 117 | 121 | 120 | 125 | 159 | 719.85 | 1041 | 669 | 835 | 680 | 691 | 654 | 811 | 805 | 1095 |
| 359.3  | 124 | 168 | 167 | 167 | 119 | 120 | 120 | 126 | 156 | 720.18 | 1040 | 696 | 843 | 693 | 696 | 661 | 822 | 804 | 1125 |
| 359.67 | 127 | 165 | 172 | 165 | 123 | 120 | 118 | 126 | 162 | 720.52 | 1053 | 681 | 839 | 684 | 693 | 631 | 818 | 804 | 1123 |
| 360.04 | 129 | 164 | 170 | 170 | 122 | 120 | 116 | 124 | 156 | 720.85 | 1021 | 699 | 827 | 688 | 694 | 645 | 819 | 808 | 1117 |
| 360.41 | 127 | 161 | 168 | 171 | 123 | 116 | 116 | 123 | 157 | 721.18 | 1028 | 692 | 828 | 683 | 705 | 639 | 815 | 786 | 1110 |
| 360.78 | 129 | 167 | 165 | 164 | 121 | 115 | 118 | 125 | 156 | 721.51 | 1042 | 689 | 841 | 694 | 702 | 637 | 826 | 784 | 1103 |
| 361.15 | 129 | 166 | 168 | 165 | 118 | 117 | 118 | 128 | 157 | 721.84 | 1045 | 673 | 822 | 684 | 687 | 644 | 818 | 795 | 1096 |
| 361.53 | 130 | 163 | 170 | 162 | 119 | 120 | 116 | 126 | 155 | 722.18 | 1008 | 674 | 816 | 670 | 683 | 633 | 807 | 784 | 1100 |
| 361.9  | 128 | 165 | 164 | 162 | 122 | 118 | 114 | 125 | 160 | 722.51 | 1028 | 685 | 812 | 673 | 683 | 649 | 824 | 803 | 1115 |
| 362.27 | 132 | 161 | 164 | 165 | 122 | 119 | 114 | 127 | 160 | 722.84 | 1028 | 686 | 817 | 677 | 672 | 635 | 815 | 789 | 1090 |
| 362.64 | 133 | 163 | 160 | 166 | 120 | 119 | 114 | 128 | 153 | 723.17 | 1043 | 674 | 808 | 680 | 689 | 650 | 802 | 798 | 1112 |
| 363.01 | 132 | 161 | 166 | 158 | 121 | 116 | 115 | 129 | 156 | 723.5  | 1042 | 687 | 828 | 682 | 678 | 633 | 792 | 792 | 1102 |
| 363.38 | 129 | 164 | 165 | 165 | 119 | 117 | 116 | 125 | 153 | 723.84 | 1029 | 675 | 816 | 684 | 689 | 625 | 816 | 787 | 1104 |
| 363.75 | 129 | 164 | 165 | 166 | 121 | 116 | 117 | 124 | 157 | 724.17 | 1022 | 680 | 810 | 676 | 687 | 634 | 804 | 783 | 1099 |
| 364.12 | 128 | 166 | 169 | 170 | 120 | 117 | 116 | 123 | 163 | 724.5  | 1046 | 675 | 835 | 678 | 672 | 629 | 813 | 792 | 1112 |
| 364.49 | 131 | 167 | 168 | 169 | 121 | 115 | 116 | 125 | 156 | 724.83 | 1022 | 682 | 809 | 676 | 689 | 629 | 805 | 784 | 1106 |
| 364.86 | 126 | 166 | 166 | 164 | 122 | 115 | 114 | 125 | 158 | 725.16 | 1009 | 675 | 798 | 674 | 680 | 634 | 806 | 797 | 1096 |
| 365.23 | 127 | 169 | 166 | 162 | 122 | 115 | 115 | 123 | 157 | 725.49 | 1019 | 684 | 800 | 670 | 694 | 622 | 813 | 778 | 1092 |
| 365.6  | 127 | 167 | 169 | 166 | 121 | 118 | 116 | 125 | 158 | 725.83 | 1034 | 681 | 816 | 666 | 670 | 629 | 800 | 783 | 1074 |
| 365.97 | 129 | 163 | 168 | 167 | 122 | 121 | 117 | 126 | 161 | 726.16 | 1001 | 697 | 796 | 673 | 673 | 623 | 805 | 790 | 1077 |
| 366.34 | 130 | 164 | 167 | 165 | 123 | 122 | 117 | 125 | 163 | 726.49 | 1012 |     |     |     |     |     |     |     |      |

|        |     |     |     |     |     |     |     |     |     |        |      |     |     |     |     |     |     |     |      |
|--------|-----|-----|-----|-----|-----|-----|-----|-----|-----|--------|------|-----|-----|-----|-----|-----|-----|-----|------|
| 370.41 | 130 | 164 | 167 | 166 | 120 | 118 | 117 | 127 | 155 | 730.13 | 1002 | 656 | 795 | 649 | 670 | 618 | 799 | 782 | 1060 |
| 370.78 | 127 | 160 | 165 | 165 | 120 | 118 | 115 | 125 | 156 | 730.46 | 1004 | 670 | 801 | 655 | 670 | 600 | 784 | 772 | 1083 |
| 371.15 | 127 | 163 | 166 | 165 | 120 | 121 | 115 | 125 | 156 | 730.79 | 986  | 656 | 787 | 657 | 672 | 617 | 775 | 762 | 1060 |
| 371.52 | 131 | 161 | 174 | 167 | 118 | 120 | 114 | 126 | 166 | 731.13 | 989  | 658 | 777 | 667 | 658 | 622 | 785 | 764 | 1069 |
| 371.89 | 129 | 167 | 175 | 162 | 118 | 118 | 114 | 127 | 165 | 731.46 | 983  | 638 | 794 | 658 | 663 | 611 | 788 | 778 | 1055 |
| 372.26 | 132 | 168 | 172 | 165 | 121 | 118 | 118 | 126 | 159 | 731.79 | 994  | 657 | 782 | 655 | 662 | 604 | 783 | 754 | 1059 |
| 372.63 | 129 | 171 | 169 | 167 | 124 | 118 | 118 | 125 | 160 | 732.12 | 978  | 644 | 795 | 644 | 651 | 602 | 766 | 764 | 1047 |
| 373    | 130 | 162 | 170 | 164 | 124 | 118 | 117 | 123 | 161 | 732.45 | 991  | 647 | 801 | 648 | 652 | 612 | 765 | 758 | 1064 |
| 373.37 | 128 | 161 | 168 | 168 | 122 | 118 | 116 | 125 | 154 | 732.78 | 976  | 663 | 782 | 655 | 660 | 616 | 753 | 759 | 1053 |
| 373.73 | 131 | 162 | 166 | 168 | 120 | 118 | 119 | 123 | 160 | 733.11 | 973  | 651 | 776 | 640 | 664 | 604 | 774 | 750 | 1048 |
| 374.1  | 132 | 161 | 170 | 167 | 121 | 117 | 119 | 125 | 165 | 733.44 | 963  | 652 | 777 | 649 | 648 | 601 | 771 | 756 | 1058 |
| 374.47 | 129 | 166 | 169 | 166 | 122 | 117 | 118 | 128 | 161 | 733.77 | 960  | 647 | 780 | 640 | 661 | 606 | 765 | 755 | 1046 |
| 374.84 | 128 | 167 | 168 | 168 | 123 | 118 | 117 | 128 | 165 | 734.1  | 986  | 644 | 772 | 664 | 646 | 611 | 766 | 751 | 1028 |
| 375.21 | 129 | 167 | 169 | 171 | 122 | 117 | 117 | 125 | 165 | 734.43 | 964  | 660 | 775 | 647 | 657 | 601 | 768 | 757 | 1050 |
| 375.58 | 128 | 165 | 167 | 165 | 122 | 118 | 116 | 129 | 163 | 734.76 | 975  | 648 | 765 | 652 | 652 | 611 | 765 | 764 | 1038 |
| 375.95 | 133 | 165 | 173 | 167 | 120 | 119 | 114 | 128 | 157 | 735.09 | 967  | 648 | 766 | 631 | 647 | 584 | 758 | 751 | 1035 |
| 376.32 | 134 | 162 | 171 | 167 | 116 | 119 | 115 | 126 | 158 | 735.42 | 964  | 621 | 770 | 640 | 641 | 598 | 746 | 754 | 1035 |
| 376.69 | 132 | 168 | 168 | 168 | 119 | 120 | 118 | 126 | 162 | 735.75 | 958  | 636 | 762 | 634 | 638 | 601 | 785 | 755 | 1022 |
| 377.06 | 132 | 170 | 170 | 167 | 119 | 118 | 120 | 128 | 161 | 736.08 | 961  | 639 | 765 | 630 | 632 | 592 | 757 | 758 | 1031 |
| 377.43 | 135 | 170 | 175 | 167 | 120 | 120 | 117 | 128 | 159 | 736.41 | 967  | 650 | 767 | 650 | 648 | 588 | 762 | 756 | 1044 |
| 377.8  | 134 | 171 | 173 | 168 | 118 | 119 | 115 | 126 | 156 | 736.74 | 959  | 638 | 771 | 635 | 637 | 581 | 751 | 749 | 1031 |
| 378.17 | 130 | 164 | 170 | 166 | 118 | 116 | 115 | 128 | 157 | 737.07 | 951  | 644 | 773 | 647 | 660 | 605 | 779 | 753 | 1036 |
| 378.54 | 134 | 171 | 172 | 164 | 118 | 117 | 119 | 133 | 160 | 737.4  | 973  | 638 | 770 | 634 | 633 | 605 | 754 | 746 | 1020 |
| 378.9  | 133 | 168 | 172 | 166 | 120 | 118 | 120 | 129 | 161 | 737.73 | 948  | 633 | 763 | 647 | 657 | 593 | 761 | 742 | 1022 |
| 379.27 | 133 | 172 | 171 | 167 | 121 | 117 | 116 | 128 | 161 | 738.06 | 953  | 649 | 756 | 629 | 637 | 601 | 752 | 743 | 1027 |
| 379.64 | 134 | 169 | 169 | 171 | 120 | 116 | 115 | 128 | 162 | 738.39 | 983  | 637 | 747 | 624 | 644 | 584 | 757 | 744 | 1030 |
| 380.01 | 139 | 173 | 172 | 170 | 124 | 117 | 115 | 132 | 168 | 738.72 | 963  | 632 | 780 | 622 | 652 | 587 | 757 | 753 | 1035 |
| 380.38 | 137 | 167 | 171 | 169 | 122 | 118 | 118 | 127 | 167 | 739.05 | 939  | 629 | 766 | 629 | 641 | 585 | 744 | 740 | 1016 |
| 380.75 | 129 | 166 | 169 | 166 | 120 | 121 | 119 | 127 | 164 | 739.38 | 967  | 631 | 767 | 628 | 639 | 589 | 741 | 736 | 1022 |
| 381.12 | 132 | 169 | 170 | 168 | 122 | 120 | 118 | 126 | 164 | 739.71 | 956  | 638 | 745 | 635 | 647 | 588 | 754 | 735 | 1021 |
| 381.49 | 134 | 169 | 174 | 166 | 123 | 119 | 118 | 124 | 166 | 740.04 | 932  | 629 | 751 | 619 | 638 | 581 | 761 | 732 | 1000 |
| 381.86 | 134 | 166 | 171 | 164 | 119 | 119 | 118 | 125 | 165 | 740.37 | 953  | 633 | 748 | 631 | 626 | 586 | 738 | 731 | 1045 |
| 382.22 | 134 | 170 | 175 | 164 | 118 | 119 | 121 | 127 | 161 | 740.7  | 955  | 633 | 758 | 624 | 634 | 576 | 741 | 734 | 991  |
| 382.59 | 136 | 173 | 174 | 174 | 123 | 118 | 123 | 133 | 171 | 741.03 | 948  | 621 | 758 | 616 | 618 | 575 | 732 | 739 | 1019 |
| 382.96 | 133 | 168 | 175 | 171 | 123 | 118 | 122 | 129 | 164 | 741.36 | 946  | 634 | 754 | 628 | 635 | 587 | 759 | 736 | 1015 |
| 383.33 | 134 | 170 | 173 | 170 | 123 | 119 | 119 | 125 | 171 | 741.69 | 941  | 622 | 746 | 614 | 629 | 581 | 738 | 731 | 1018 |
| 383.7  | 134 | 171 | 174 | 170 | 118 | 120 | 121 | 126 | 166 | 742.02 | 959  | 630 | 744 | 630 | 634 | 590 | 753 | 735 | 1015 |
| 384.07 | 134 | 163 | 173 | 172 | 117 | 118 | 119 | 126 | 164 | 742.35 | 935  | 618 | 743 | 622 | 628 | 573 | 753 | 735 | 994  |
| 384.44 | 129 | 167 | 171 | 167 | 118 | 116 | 118 | 127 | 172 | 742.68 | 923  | 625 | 735 | 628 | 646 | 591 | 731 | 712 | 1015 |
| 384.81 | 129 | 162 | 170 | 164 | 119 | 116 | 117 | 127 | 164 | 743    | 923  | 617 | 740 | 620 | 623 | 567 | 730 | 725 | 993  |
| 385.17 | 128 | 166 | 171 | 170 | 121 | 117 | 116 | 127 | 162 | 743.33 | 949  | 615 | 741 | 621 | 624 | 578 | 733 | 717 | 1018 |
| 385.54 | 132 | 163 | 171 | 166 | 123 | 118 | 117 | 127 | 167 | 743.66 | 910  | 613 | 742 | 625 | 609 | 569 | 733 | 724 | 1009 |
| 385.91 | 135 | 170 | 171 | 164 | 121 | 118 | 117 | 128 | 172 | 743.99 | 949  | 626 | 750 | 617 | 624 | 571 | 733 | 704 | 1006 |
| 386.28 | 135 | 165 | 172 | 168 | 121 | 116 | 117 | 124 | 164 | 744.32 | 929  | 621 | 735 | 610 | 630 | 577 | 722 | 719 | 1003 |
| 386.65 | 135 | 168 | 174 | 166 | 121 | 118 | 117 | 125 | 165 | 744.65 | 915  | 615 | 743 | 610 | 620 | 571 | 735 | 726 | 998  |
| 387.02 | 132 | 169 | 170 | 167 | 122 | 119 | 117 | 126 | 167 | 744.98 | 929  | 620 | 752 | 609 | 624 | 580 | 723 | 719 | 994  |
| 387.38 | 134 | 169 | 174 | 166 | 123 | 117 | 117 | 129 | 167 | 745.31 | 912  | 624 | 739 | 611 | 609 | 574 | 714 | 718 | 988  |
| 387.75 | 135 | 169 | 171 | 167 | 122 | 116 | 114 | 127 | 174 | 745.64 | 923  | 610 | 743 | 622 | 621 | 578 | 740 | 712 | 1004 |
| 388.12 | 134 | 169 | 172 | 170 | 122 | 117 | 114 | 126 | 170 | 745.96 | 913  | 610 | 754 | 594 | 621 | 568 | 735 | 720 | 988  |
| 388.49 | 132 | 164 | 167 | 169 | 124 | 119 | 113 | 125 | 174 | 746.29 | 916  | 622 | 730 | 606 | 614 | 573 | 724 | 714 | 984  |
| 388.86 | 136 | 163 | 173 | 162 | 120 | 120 | 116 | 125 | 173 | 746.62 | 899  | 610 | 733 | 605 | 606 | 560 | 717 | 716 | 985  |
| 389.23 | 136 | 171 | 175 | 168 | 119 | 117 | 117 | 129 | 174 | 746.95 | 924  | 610 | 725 | 610 | 614 | 584 | 732 | 713 | 986  |
| 389.59 | 139 | 172 | 180 | 168 | 121 | 117 | 118 | 129 | 169 | 747.28 | 919  | 601 | 710 | 594 | 622 | 573 | 721 | 704 | 965  |
| 389.96 | 144 | 173 | 176 | 176 | 129 | 121 | 122 | 133 | 180 | 747.61 | 916  | 604 | 738 | 613 | 608 | 573 | 709 | 704 | 973  |
| 390.33 | 138 | 167 | 175 | 171 | 123 | 120 | 120 | 129 | 173 | 747.94 | 909  | 591 | 729 | 602 | 614 | 565 | 702 | 722 | 978  |
| 390.7  | 136 | 166 | 176 | 165 | 121 | 118 | 116 | 127 | 170 | 748.26 | 918  | 606 | 726 | 604 | 603 | 577 | 718 | 700 | 977  |
| 391.07 | 135 | 172 | 170 | 165 | 120 | 118 | 114 | 129 | 171 | 748.59 | 910  | 593 | 716 | 603 | 604 | 561 | 705 | 694 | 967  |
| 391.43 | 139 | 173 | 172 | 168 | 124 | 122 | 119 | 132 | 173 | 748.92 | 922  | 614 | 721 | 615 | 611 | 565 | 733 | 706 | 990  |
| 391.8  | 138 | 175 | 168 | 168 | 122 | 120 | 119 | 132 | 175 | 749.25 | 903  | 606 | 722 | 615 | 595 | 568 | 717 | 699 | 975  |
| 392.17 | 138 | 170 | 175 | 166 | 118 | 117 | 119 | 128 | 171 | 749.58 | 908  | 606 | 719 | 607 | 619 | 560 | 702 | 719 | 965  |
| 392.54 | 139 | 167 | 176 | 174 | 116 | 118 | 118 | 128 | 173 | 749.91 | 899  | 605 | 722 | 598 | 608 | 558 | 696 | 698 | 962  |
| 392.91 | 138 | 172 | 173 | 169 | 116 | 118 | 117 | 127 | 175 | 750.23 | 914  | 601 | 709 | 592 | 599 | 559 | 716 | 693 | 972  |
| 393.27 | 141 | 168 | 172 | 169 | 118 | 117 | 117 | 126 | 179 | 750.56 | 914  | 610 | 734 | 593 | 618 | 571 | 722 | 712 | 972  |
| 393.64 | 142 | 171 | 175 | 173 | 119 | 116 | 119 | 128 | 177 | 750.89 | 902  | 590 | 721 | 586 | 613 | 560 | 707 | 676 | 972  |
| 394.01 | 140 | 170 | 176 | 166 | 117 | 114 | 117 | 128 | 173 | 751.22 | 892  | 587 | 701 | 588 | 599 | 561 | 701 | 677 | 971  |
| 394.38 | 141 | 167 | 177 | 167 | 119 | 115 | 115 | 127 | 174 | 751.55 | 887  | 591 | 690 | 595 | 597 | 553 | 699 | 704 | 944  |
| 394.75 | 139 | 170 | 173 | 169 | 121 | 116 | 116 | 129 | 176 | 751.87 | 891  | 593 | 712 | 586 | 601 | 548 | 693 | 686 | 960  |
| 395.11 | 141 | 173 | 178 | 169 | 119 | 117 | 115 | 132 | 175 | 752.2  | 898  | 582 | 706 | 597 | 598 | 544 | 696 | 692 | 952  |
| 395.48 | 140 | 169 | 174 | 172 | 120 | 118 | 117 | 128 | 178 | 752.53 | 884  | 596 | 705 | 577 | 603 | 547 | 694 | 683 | 960  |
| 395.85 | 136 | 167 | 172 | 168 | 123 | 118 | 117 | 128 | 170 | 752.86 | 886  | 596 | 698 | 586 | 590 | 552 | 720 | 681 | 959  |
| 396.22 | 143 | 166 | 176 | 171 | 123 | 114 | 115 | 126 | 169 | 753.19 | 887  | 582 | 699 | 586 | 592 | 548 | 684 | 693 | 952  |
| 396.58 | 144 | 166 | 174 | 170 | 122 | 112 | 117 | 126 | 172 | 753.51 | 875  | 603 | 715 | 585 | 591 | 537 | 684 | 681 | 940  |
| 396.95 | 141 | 172 | 172 | 168 | 124 | 114 | 115 | 127 | 176 | 753    |      |     |     |     |     |     |     |     |      |

|        |     |     |     |     |     |     |     |     |     |        |     |     |     |     |       |     |     |     |     |
|--------|-----|-----|-----|-----|-----|-----|-----|-----|-----|--------|-----|-----|-----|-----|-------|-----|-----|-----|-----|
| 400.63 | 149 | 165 | 175 | 168 | 120 | 113 | 119 | 129 | 177 | 757.12 | 840 | 574 | 694 | 571 | 570   | 521 | 661 | 666 | 925 |
| 400.99 | 148 | 168 | 177 | 170 | 119 | 113 | 118 | 126 | 187 | 757.44 | 854 | 564 | 665 | 571 | 571   | 527 | 654 | 659 | 908 |
| 401.36 | 147 | 172 | 171 | 167 | 122 | 113 | 116 | 128 | 185 | 757.77 | 858 | 574 | 692 | 588 | 566   | 529 | 678 | 661 | 932 |
| 401.73 | 147 | 168 | 171 | 166 | 124 | 114 | 120 | 129 | 183 | 758.1  | 848 | 564 | 695 | 557 | 570   | 535 | 669 | 649 | 903 |
| 402.09 | 147 | 165 | 174 | 166 | 121 | 114 | 120 | 126 | 183 | 758.42 | 839 | 567 | 686 | 571 | 576   | 526 | 670 | 644 | 909 |
| 402.46 | 148 | 167 | 171 | 165 | 118 | 117 | 119 | 127 | 184 | 758.75 | 831 | 564 | 669 | 558 | 566   | 524 | 679 | 653 | 907 |
| 402.83 | 149 | 171 | 172 | 169 | 117 | 120 | 120 | 129 | 184 | 759.08 | 842 | 551 | 664 | 555 | 560   | 511 | 674 | 650 | 921 |
| 403.2  | 147 | 169 | 174 | 170 | 119 | 118 | 120 | 127 | 188 | 759.4  | 822 | 570 | 663 | 556 | 564   | 524 | 668 | 638 | 908 |
| 403.56 | 147 | 169 | 170 | 169 | 120 | 118 | 119 | 132 | 189 | 759.73 | 843 | 575 | 676 | 564 | 552   | 524 | 676 | 656 | 890 |
| 403.93 | 150 | 170 | 176 | 170 | 119 | 118 | 119 | 128 | 177 | 760.06 | 830 | 562 | 673 | 547 | 543   | 518 | 671 | 646 | 901 |
| 404.3  | 148 | 171 | 170 | 169 | 122 | 116 | 119 | 126 | 177 | 760.38 | 833 | 556 | 670 | 564 | 556   | 515 | 670 | 647 | 900 |
| 404.66 | 148 | 171 | 176 | 170 | 125 | 116 | 119 | 127 | 186 | 760.71 | 846 | 556 | 673 | 564 | 562   | 518 | 652 | 638 | 896 |
| 405.03 | 152 | 167 | 170 | 171 | 121 | 117 | 118 | 128 | 183 | 761.04 | 830 | 562 | 660 | 551 | 558   | 516 | 657 | 625 | 900 |
| 405.4  | 148 | 173 | 173 | 167 | 120 | 119 | 118 | 126 | 183 | 761.36 | 819 | 559 | 671 | 555 | 542   | 512 | 652 | 633 | 892 |
| 405.76 | 149 | 170 | 177 | 164 | 120 | 118 | 120 | 126 | 187 | 761.69 | 824 | 553 | 652 | 555 | 551   | 501 | 639 | 623 | 880 |
| 406.13 | 148 | 172 | 172 | 168 | 121 | 116 | 120 | 130 | 191 | 762.02 | 817 | 552 | 659 | 557 | 554   | 514 | 654 | 638 | 883 |
| 406.5  | 152 | 171 | 172 | 165 | 122 | 114 | 120 | 129 | 186 | 762.34 | 808 | 546 | 655 | 542 | 536   | 494 | 624 | 626 | 866 |
| 406.86 | 147 | 168 | 174 | 168 | 122 | 113 | 124 | 129 | 189 | 762.67 | 818 | 530 | 647 | 545 | 539   | 505 | 653 | 629 | 877 |
| 407.23 | 150 | 169 | 176 | 170 | 122 | 114 | 121 | 132 | 187 | 763    | 798 | 551 | 651 | 552 | 544   | 500 | 640 | 622 | 872 |
| 407.6  | 158 | 171 | 178 | 173 | 126 | 115 | 120 | 132 | 188 | 763.32 | 799 | 543 | 650 | 553 | 542   | 501 | 640 | 618 | 858 |
| 407.96 | 154 | 169 | 177 | 171 | 124 | 114 | 120 | 129 | 187 | 763.65 | 798 | 551 | 648 | 554 | 544   | 494 | 651 | 634 | 874 |
| 408.33 | 154 | 169 | 176 | 169 | 123 | 113 | 119 | 132 | 183 | 763.98 | 799 | 543 | 650 | 536 | 537   | 490 | 637 | 610 | 863 |
| 408.7  | 153 | 166 | 173 | 171 | 121 | 113 | 118 | 129 | 188 | 764.3  | 821 | 545 | 652 | 541 | 535   | 502 | 635 | 620 | 863 |
| 409.06 | 153 | 168 | 176 | 172 | 120 | 114 | 117 | 129 | 188 | 764.63 | 795 | 552 | 657 | 538 | 540   | 500 | 640 | 621 | 849 |
| 409.43 | 154 | 173 | 178 | 169 | 121 | 117 | 118 | 127 | 186 | 764.95 | 808 | 531 | 634 | 528 | 529   | 501 | 633 | 622 | 843 |
| 409.8  | 158 | 172 | 175 | 170 | 123 | 116 | 122 | 128 | 185 | 765.28 | 804 | 540 | 641 | 534 | 547   | 489 | 646 | 613 | 858 |
| 410.16 | 160 | 170 | 175 | 169 | 126 | 115 | 121 | 132 | 190 | 765.61 | 795 | 531 | 628 | 552 | 532   | 490 | 634 | 611 | 840 |
| 410.53 | 156 | 171 | 173 | 166 | 123 | 117 | 120 | 133 | 185 | 765.93 | 796 | 543 | 627 | 529 | 537   | 488 | 621 | 610 | 853 |
| 410.89 | 155 | 172 | 172 | 164 | 125 | 118 | 121 | 135 | 186 | 766.26 | 794 | 526 | 641 | 537 | 529   | 491 | 625 | 605 | 851 |
| 411.26 | 158 | 171 | 174 | 168 | 123 | 119 | 123 | 132 | 187 | 766.58 | 785 | 538 | 632 | 522 | 521   | 495 | 606 | 590 | 853 |
| 411.63 | 165 | 171 | 177 | 170 | 123 | 118 | 124 | 131 | 192 | 766.91 | 776 | 545 | 619 | 524 | 526   | 484 | 615 | 597 | 842 |
| 411.99 | 157 | 167 | 173 | 174 | 122 | 117 | 123 | 127 | 196 | 767.23 | 785 | 529 | 620 | 534 | 534   | 488 | 639 | 612 | 848 |
| 412.36 | 157 | 176 | 184 | 171 | 120 | 118 | 122 | 132 | 188 | 767.56 | 780 | 524 | 613 | 522 | 521   | 489 | 616 | 586 | 838 |
| 412.73 | 165 | 168 | 180 | 168 | 121 | 118 | 122 | 132 | 188 | 767.89 | 784 | 534 | 632 | 526 | 522   | 478 | 616 | 609 | 835 |
| 413.09 | 160 | 169 | 177 | 171 | 125 | 119 | 121 | 129 | 184 | 768.21 | 781 | 529 | 620 | 534 | 532   | 490 | 610 | 600 | 838 |
| 413.46 | 167 | 169 | 178 | 175 | 129 | 120 | 120 | 133 | 196 | 768.54 | 763 | 523 | 625 | 510 | 509   | 476 | 615 | 600 | 837 |
| 413.82 | 165 | 173 | 176 | 172 | 127 | 118 | 120 | 133 | 197 | 768.86 | 769 | 526 | 617 | 523 | 522   | 481 | 607 | 602 | 834 |
| 414.19 | 163 | 167 | 179 | 167 | 125 | 116 | 119 | 132 | 190 | 769.19 | 774 | 526 | 625 | 522 | 509   | 480 | 614 | 607 | 845 |
| 414.56 | 171 | 174 | 176 | 168 | 126 | 120 | 124 | 130 | 192 | 769.51 | 781 | 512 | 620 | 517 | 520   | 475 | 597 | 591 | 821 |
| 414.92 | 165 | 170 | 172 | 176 | 126 | 120 | 123 | 132 | 193 | 769.84 | 762 | 507 | 625 | 516 | 514   | 468 | 600 | 594 | 813 |
| 415.29 | 173 | 172 | 178 | 169 | 127 | 119 | 122 | 133 | 188 | 770.16 | 749 | 522 | 616 | 509 | 514   | 481 | 603 | 593 | 820 |
| 415.65 | 163 | 173 | 177 | 172 | 128 | 117 | 122 | 132 | 189 | 770.49 | 759 | 516 | 613 | 525 | 515   | 455 | 590 | 589 | 808 |
| 416.02 | 172 | 174 | 177 | 170 | 128 | 117 | 125 | 129 | 194 | 770.81 | 748 | 519 | 613 | 514 | 510   | 475 | 591 | 596 | 811 |
| 416.39 | 172 | 171 | 176 | 171 | 132 | 120 | 126 | 133 | 195 | 771.14 | 769 | 526 | 612 | 516 | 509   | 476 | 612 | 589 | 795 |
| 416.75 | 175 | 177 | 175 | 177 | 129 | 122 | 132 | 137 | 196 | 771.46 | 757 | 511 | 611 | 509 | 495   | 480 | 591 | 596 | 810 |
| 417.12 | 172 | 171 | 172 | 173 | 127 | 119 | 125 | 137 | 191 | 771.79 | 761 | 512 | 606 | 508 | 495   | 468 | 587 | 571 | 791 |
| 417.48 | 175 | 170 | 175 | 169 | 127 | 121 | 122 | 135 | 193 | 772.11 | 734 | 513 | 605 | 501 | 501   | 480 | 585 | 576 | 802 |
| 417.85 | 172 | 177 | 178 | 173 | 127 | 121 | 122 | 133 | 199 | 772.44 | 732 | 496 | 591 | 490 | 496   | 452 | 576 | 565 | 791 |
| 418.22 | 174 | 171 | 180 | 168 | 127 | 123 | 123 | 131 | 207 | 772.76 | 742 | 515 | 613 | 512 | 497   | 461 | 569 | 573 | 799 |
| 418.58 | 175 | 168 | 177 | 171 | 127 | 121 | 123 | 135 | 200 | 773.09 | 740 | 507 | 589 | 501 | 495   | 467 | 592 | 570 | 778 |
| 418.95 | 166 | 172 | 177 | 171 | 128 | 119 | 126 | 137 | 193 | 773.41 | 734 | 504 | 592 | 496 | 502   | 466 | 579 | 575 | 784 |
| 419.31 | 166 | 170 | 174 | 172 | 130 | 118 | 125 | 137 | 200 | 773.74 | 725 | 500 | 593 | 494 | 481   | 458 | 575 | 574 | 790 |
| 419.68 | 169 | 173 | 173 | 172 | 128 | 119 | 121 | 136 | 202 | 774.06 | 727 | 513 | 595 | 497 | 492   | 468 | 580 | 563 | 772 |
| 420.04 | 177 | 170 | 175 | 172 | 128 | 122 | 121 | 131 | 212 | 774.39 | 735 | 497 | 589 | 498 | 495   | 453 | 566 | 561 | 776 |
| 420.41 | 180 | 170 | 182 | 170 | 132 | 121 | 121 | 132 | 203 | 774.71 | 738 | 490 | 587 | 500 | 483   | 452 | 576 | 571 | 782 |
| 420.77 | 172 | 175 | 181 | 168 | 129 | 121 | 123 | 132 | 200 | 775.04 | 723 | 506 | 581 | 488 | 490   | 460 | 570 | 560 | 767 |
| 421.14 | 177 | 168 | 181 | 168 | 132 | 123 | 124 | 129 | 208 | 775.36 | 718 | 501 | 585 | 496 | 494   | 453 | 576 | 557 | 772 |
| 421.51 | 177 | 169 | 182 | 170 | 129 | 123 | 124 | 128 | 209 | 775.69 | 719 | 484 | 566 | 480 | 483   | 440 | 557 | 559 | 768 |
| 421.87 | 180 | 171 | 182 | 172 | 127 | 123 | 124 | 132 | 205 | 776.01 | 703 | 503 | 592 | 488 | 485   | 454 | 556 | 548 | 769 |
| 422.24 | 182 | 170 | 181 | 170 | 128 | 122 | 125 | 136 | 211 | 776.34 | 705 | 496 | 569 | 496 | 481   | 443 | 558 | 547 | 768 |
| 422.6  | 191 | 176 | 178 | 170 | 128 | 119 | 121 | 134 | 214 | 776.66 | 716 | 487 | 578 | 495 | 487   | 471 | 574 | 577 | 761 |
| 422.97 | 187 | 173 | 178 | 169 | 127 | 117 | 121 | 133 | 218 | 776.98 | 702 | 477 | 582 | 487 | 474   | 440 | 550 | 543 | 747 |
| 423.33 | 190 | 174 | 185 | 176 | 129 | 118 | 120 | 133 | 213 | 777.31 | 694 | 497 | 554 | 484 | 475   | 446 | 549 | 548 | 750 |
| 423.7  | 180 | 169 | 181 | 169 | 127 | 120 | 124 | 130 | 208 | 777.63 | 701 | 485 | 566 | 483 | 480   | 445 | 552 | 548 | 766 |
| 424.06 | 183 | 176 | 183 | 169 | 128 | 122 | 128 | 132 | 216 | 777.96 | 696 | 490 | 563 | 474 | 464   | 427 | 550 | 546 | 746 |
| 424.43 | 186 | 172 | 178 | 170 | 127 | 119 | 128 | 135 | 219 | 778.28 | 698 | 483 | 567 | 479 | 476   | 453 | 541 | 542 | 744 |
| 424.79 | 187 | 172 | 182 | 173 | 127 | 118 | 124 | 138 | 217 | 778.61 | 694 | 493 | 578 | 480 | 470   | 435 | 544 | 548 | 748 |
| 425.16 | 194 | 174 | 184 | 173 | 130 | 120 | 125 | 134 | 223 | 778.93 | 695 | 479 | 563 | 485 | 474   | 437 | 534 | 540 | 733 |
| 425.52 | 190 | 169 | 185 | 165 | 132 | 120 | 129 | 137 | 225 | 779.25 | 693 | 479 | 555 | 469 | 466   | 426 | 546 | 537 | 749 |
| 425.89 | 193 | 173 | 180 | 168 | 133 | 120 | 130 | 136 | 218 | 779.58 | 675 | 482 | 567 | 465 | 465   | 438 | 534 | 542 | 743 |
| 426.25 | 195 | 170 | 180 | 174 | 132 | 122 | 127 | 136 | 224 | 779.9  | 693 | 478 | 562 | 477 | 458   | 430 | 530 | 539 | 729 |
| 426.62 | 195 | 173 | 182 | 171 | 135 | 122 | 125 | 136 | 222 | 780.22 | 669 | 472 | 555 | 477 | 462   | 434 | 524 | 530 | 738 |
| 426.98 | 200 | 169 | 185 | 171 | 133 | 121 | 125 | 135 | 235 | 780.55 | 677 | 483 | 555 | 473 | 463</ |     |     |     |     |

|        |     |     |     |     |     |     |     |     |     |        |     |     |     |     |     |     |     |     |     |
|--------|-----|-----|-----|-----|-----|-----|-----|-----|-----|--------|-----|-----|-----|-----|-----|-----|-----|-----|-----|
| 430.63 | 210 | 178 | 182 | 168 | 134 | 123 | 130 | 140 | 236 | 783.78 | 653 | 461 | 530 | 455 | 459 | 409 | 516 | 523 | 705 |
| 430.99 | 220 | 181 | 186 | 168 | 137 | 121 | 132 | 142 | 238 | 784.11 | 655 | 467 | 541 | 458 | 445 | 412 | 524 | 523 | 709 |
| 431.36 | 210 | 179 | 182 | 173 | 137 | 120 | 131 | 140 | 246 | 784.43 | 652 | 466 | 528 | 449 | 458 | 414 | 514 | 518 | 700 |
| 431.72 | 212 | 182 | 184 | 171 | 136 | 123 | 130 | 142 | 256 | 784.75 | 652 | 455 | 521 | 451 | 442 | 417 | 499 | 517 | 702 |
| 432.09 | 208 | 180 | 185 | 174 | 138 | 128 | 132 | 146 | 243 | 785.08 | 624 | 458 | 540 | 452 | 434 | 402 | 497 | 502 | 692 |
| 432.45 | 225 | 181 | 184 | 172 | 137 | 128 | 128 | 151 | 255 | 785.4  | 638 | 456 | 536 | 455 | 436 | 411 | 506 | 502 | 695 |
| 432.82 | 220 | 184 | 184 | 177 | 137 | 125 | 133 | 145 | 251 | 785.72 | 654 | 460 | 540 | 449 | 439 | 421 | 511 | 504 | 684 |
| 433.18 | 214 | 181 | 186 | 172 | 140 | 122 | 136 | 144 | 254 | 786.05 | 638 | 443 | 524 | 457 | 438 | 402 | 519 | 497 | 697 |
| 433.55 | 224 | 182 | 188 | 174 | 144 | 126 | 137 | 149 | 265 | 786.37 | 638 | 453 | 527 | 451 | 445 | 419 | 494 | 513 | 705 |
| 433.91 | 222 | 181 | 192 | 173 | 142 | 129 | 136 | 146 | 257 | 786.69 | 650 | 451 | 525 | 451 | 445 | 418 | 514 | 515 | 685 |
| 434.27 | 220 | 182 | 191 | 174 | 142 | 128 | 136 | 142 | 258 | 787.01 | 629 | 446 | 534 | 448 | 439 | 411 | 504 | 507 | 677 |
| 434.64 | 221 | 180 | 187 | 172 | 137 | 127 | 136 | 145 | 257 | 787.34 | 649 | 445 | 520 | 437 | 434 | 401 | 504 | 497 | 682 |
| 435    | 230 | 176 | 190 | 174 | 139 | 126 | 139 | 147 | 268 | 787.66 | 636 | 456 | 520 | 446 | 431 | 410 | 493 | 498 | 687 |
| 435.37 | 227 | 181 | 195 | 173 | 141 | 126 | 139 | 144 | 273 | 787.98 | 637 | 448 | 511 | 465 | 430 | 415 | 509 | 501 | 689 |
| 435.73 | 225 | 186 | 197 | 175 | 142 | 128 | 142 | 150 | 269 | 788.3  | 622 | 453 | 531 | 448 | 437 | 406 | 492 | 502 | 672 |
| 436.09 | 230 | 178 | 188 | 171 | 140 | 128 | 138 | 145 | 266 | 788.63 | 627 | 449 | 526 | 447 | 431 | 401 | 502 | 498 | 690 |
| 436.46 | 241 | 182 | 187 | 174 | 139 | 126 | 137 | 147 | 277 | 788.95 | 630 | 441 | 523 | 442 | 440 | 416 | 501 | 502 | 675 |
| 436.82 | 232 | 183 | 188 | 173 | 139 | 127 | 136 | 148 | 263 | 789.27 | 637 | 453 | 515 | 449 | 412 | 410 | 502 | 499 | 677 |
| 437.19 | 242 | 185 | 192 | 180 | 143 | 129 | 140 | 152 | 282 | 789.59 | 637 | 447 | 521 | 439 | 433 | 399 | 494 | 503 | 680 |
| 437.55 | 245 | 189 | 195 | 180 | 152 | 136 | 146 | 161 | 284 | 789.92 | 633 | 443 | 522 | 434 | 428 | 404 | 495 | 480 | 674 |
| 437.91 | 247 | 188 | 192 | 173 | 149 | 128 | 144 | 154 | 280 | 790.24 | 624 | 452 | 507 | 438 | 423 | 401 | 499 | 497 | 673 |
| 438.28 | 236 | 187 | 193 | 173 | 146 | 129 | 148 | 146 | 279 | 790.56 | 636 | 443 | 527 | 440 | 430 | 394 | 495 | 503 | 680 |
| 438.64 | 238 | 185 | 188 | 176 | 141 | 129 | 141 | 155 | 277 | 790.88 | 638 | 452 | 516 | 447 | 445 | 416 | 506 | 502 | 679 |
| 439.01 | 255 | 182 | 198 | 172 | 141 | 129 | 142 | 153 | 288 | 791.21 | 616 | 455 | 520 | 441 | 432 | 405 | 493 | 497 | 673 |
| 439.37 | 255 | 185 | 197 | 174 | 142 | 132 | 144 | 157 | 282 | 791.53 | 621 | 445 | 520 | 439 | 428 | 396 | 510 | 491 | 684 |
| 439.73 | 246 | 187 | 192 | 173 | 143 | 129 | 145 | 153 | 287 | 791.85 | 634 | 440 | 514 | 446 | 432 | 399 | 484 | 489 | 671 |
| 440.1  | 246 | 190 | 199 | 177 | 143 | 130 | 142 | 157 | 296 | 792.17 | 618 | 446 | 525 | 435 | 431 | 392 | 488 | 506 | 674 |
| 440.46 | 251 | 188 | 195 | 175 | 146 | 132 | 145 | 159 | 301 | 792.49 | 618 | 442 | 531 | 447 | 424 | 396 | 501 | 478 | 673 |
| 440.83 | 256 | 188 | 195 | 175 | 147 | 137 | 143 | 156 | 302 | 792.82 | 630 | 439 | 519 | 440 | 426 | 397 | 478 | 490 | 677 |
| 441.19 | 248 | 191 | 200 | 180 | 153 | 136 | 144 | 161 | 305 | 793.14 | 614 | 454 | 513 | 437 | 427 | 413 | 507 | 494 | 670 |
| 441.55 | 253 | 186 | 192 | 174 | 149 | 136 | 146 | 159 | 295 | 793.46 | 627 | 443 | 518 | 436 | 426 | 402 | 489 | 495 | 669 |
| 441.92 | 247 | 192 | 189 | 176 | 148 | 134 | 148 | 163 | 301 | 793.78 | 622 | 444 | 512 | 438 | 428 | 395 | 493 | 493 | 661 |
| 442.28 | 251 | 186 | 199 | 173 | 153 | 132 | 144 | 162 | 308 | 794.1  | 620 | 442 | 517 | 443 | 427 | 396 | 482 | 496 | 674 |
| 442.64 | 273 | 195 | 200 | 176 | 153 | 134 | 145 | 160 | 321 | 794.43 | 616 | 439 | 516 | 438 | 440 | 406 | 494 | 500 | 673 |
| 443.01 | 272 | 191 | 199 | 174 | 151 | 139 | 144 | 166 | 318 | 794.75 | 628 | 434 | 505 | 438 | 415 | 408 | 478 | 485 | 665 |
| 443.37 | 269 | 199 | 209 | 182 | 158 | 146 | 155 | 170 | 327 | 795.07 | 633 | 442 | 525 | 435 | 429 | 389 | 481 | 484 | 674 |
| 443.73 | 266 | 191 | 207 | 176 | 154 | 140 | 154 | 164 | 334 | 795.39 | 620 | 450 | 521 | 449 | 434 | 394 | 494 | 493 | 672 |
| 444.1  | 279 | 191 | 206 | 180 | 156 | 141 | 153 | 163 | 328 | 795.71 | 632 | 445 | 512 | 442 | 437 | 406 | 481 | 487 | 670 |
| 444.46 | 277 | 194 | 202 | 181 | 160 | 137 | 154 | 165 | 324 | 796.03 | 622 | 439 | 512 | 438 | 429 | 397 | 495 | 478 | 659 |
| 444.82 | 269 | 197 | 207 | 178 | 153 | 136 | 154 | 170 | 322 | 796.36 | 613 | 445 | 507 | 442 | 435 | 399 | 481 | 487 | 674 |
| 445.19 | 277 | 199 | 208 | 180 | 154 | 142 | 157 | 166 | 326 | 796.68 | 617 | 443 | 503 | 442 | 436 | 398 | 492 | 489 | 662 |
| 445.55 | 283 | 196 | 209 | 176 | 157 | 140 | 160 | 168 | 334 | 797    | 625 | 437 | 507 | 434 | 435 | 398 | 497 | 485 | 667 |
| 445.91 | 286 | 200 | 208 | 183 | 158 | 144 | 159 | 174 | 336 | 797.32 | 631 | 428 | 509 | 431 | 432 | 390 | 476 | 492 | 652 |
| 446.28 | 276 | 202 | 210 | 184 | 158 | 150 | 160 | 179 | 327 | 797.64 | 622 | 438 | 515 | 432 | 430 | 394 | 481 | 486 | 658 |
| 446.64 | 286 | 199 | 209 | 180 | 161 | 145 | 159 | 172 | 339 | 797.96 | 619 | 435 | 504 | 422 | 412 | 388 | 476 | 477 | 659 |
| 447    | 270 | 194 | 206 | 181 | 152 | 144 | 158 | 173 | 322 | 798.28 | 604 | 440 | 498 | 435 | 435 | 394 | 475 | 476 | 659 |
| 447.37 | 286 | 203 | 209 | 179 | 157 | 142 | 159 | 174 | 333 | 798.6  | 610 | 443 | 511 | 439 | 417 | 389 | 483 | 487 | 659 |
| 447.73 | 294 | 200 | 207 | 179 | 163 | 144 | 165 | 177 | 348 | 798.92 | 612 | 426 | 507 | 427 | 427 | 391 | 475 | 474 | 658 |
| 448.09 | 297 | 201 | 213 | 183 | 163 | 141 | 168 | 178 | 346 | 799.25 | 604 | 438 | 516 | 419 | 421 | 388 | 478 | 483 | 658 |
| 448.45 | 291 | 194 | 206 | 185 | 164 | 150 | 173 | 172 | 346 | 799.57 | 605 | 439 | 515 | 432 | 414 | 394 | 481 | 488 | 654 |
| 448.82 | 292 | 197 | 209 | 182 | 167 | 152 | 166 | 181 | 349 | 799.89 | 608 | 434 | 514 | 433 | 424 | 402 | 482 | 472 | 655 |
| 449.18 | 296 | 205 | 217 | 185 | 161 | 149 | 168 | 181 | 356 | 800.21 | 597 | 435 | 496 | 434 | 413 | 381 | 472 | 476 | 653 |
| 449.54 | 305 | 205 | 219 | 181 | 163 | 144 | 169 | 187 | 360 | 800.53 | 599 | 434 | 495 | 423 | 421 | 377 | 465 | 481 | 651 |
| 449.91 | 303 | 214 | 219 | 187 | 162 | 149 | 169 | 185 | 366 | 800.85 | 598 | 431 | 505 | 420 | 427 | 389 | 468 | 474 | 654 |
| 450.27 | 308 | 207 | 220 | 184 | 171 | 150 | 168 | 187 | 356 | 801.17 | 627 | 448 | 502 | 434 | 446 | 405 | 498 | 490 | 661 |
| 450.63 | 313 | 206 | 214 | 186 | 164 | 148 | 166 | 188 | 368 | 801.49 | 607 | 442 | 500 | 412 | 412 | 389 | 473 | 478 | 654 |
| 450.99 | 297 | 207 | 220 | 186 | 168 | 148 | 163 | 189 | 367 | 801.81 | 609 | 439 | 499 | 430 | 421 | 392 | 484 | 490 | 658 |
| 451.36 | 310 | 209 | 214 | 183 | 165 | 148 | 167 | 190 | 361 | 802.13 | 609 | 439 | 510 | 434 | 407 | 384 | 480 | 473 | 644 |
| 451.72 | 291 | 205 | 222 | 183 | 171 | 150 | 171 | 182 | 352 | 802.45 | 609 | 436 | 496 | 438 | 407 | 389 | 470 | 471 | 649 |
| 452.08 | 315 | 209 | 217 | 186 | 180 | 154 | 172 | 190 | 369 | 802.77 | 600 | 429 | 492 | 421 | 421 | 374 | 481 | 480 | 642 |
| 452.44 | 320 | 208 | 221 | 189 | 173 | 151 | 178 | 188 | 369 | 803.09 | 590 | 432 | 492 | 417 | 406 | 393 | 483 | 482 | 650 |
| 452.81 | 320 | 209 | 221 | 189 | 173 | 153 | 175 | 189 | 373 | 803.41 | 592 | 435 | 494 | 422 | 413 | 376 | 480 | 473 | 648 |
| 453.17 | 313 | 213 | 224 | 189 | 174 | 156 | 179 | 194 | 378 | 803.73 | 596 | 431 | 496 | 415 | 423 | 382 | 458 | 472 | 642 |
| 453.53 | 313 | 208 | 225 | 191 | 173 | 156 | 173 | 190 | 368 | 804.05 | 598 | 430 | 493 | 419 | 414 | 381 | 476 | 484 | 638 |
| 453.89 | 308 | 208 | 221 | 185 | 179 | 160 | 177 | 193 | 366 | 804.37 | 588 | 426 | 486 | 428 | 404 | 376 | 463 | 466 | 631 |
| 454.26 | 325 | 218 | 232 | 192 | 188 | 165 | 190 | 206 | 388 | 804.7  | 607 | 424 | 499 | 422 | 410 | 382 | 479 | 469 | 644 |
| 454.62 | 310 | 211 | 227 | 191 | 174 | 162 | 180 | 195 | 379 | 805.02 | 605 | 432 | 497 | 425 | 414 | 380 | 472 | 472 | 641 |
| 454.98 | 328 | 218 | 229 | 192 | 183 | 160 | 178 | 198 | 401 | 805.34 | 601 | 424 | 487 | 418 | 402 | 381 | 470 | 478 | 648 |
| 455.34 | 316 | 218 | 227 | 197 | 181 | 156 | 186 | 202 | 378 | 805.66 | 602 | 424 | 496 | 414 | 409 | 375 | 468 | 470 | 637 |
| 455.71 | 335 | 224 | 226 | 192 | 181 | 162 | 187 | 200 | 392 | 805.98 | 580 | 419 | 493 | 417 | 413 | 373 | 461 | 465 | 636 |
| 456.07 | 342 | 231 | 236 | 201 | 195 | 172 | 198 | 213 | 406 | 806.3  | 588 | 423 | 487 | 411 | 409 | 379 | 479 | 467 | 618 |
| 456.43 | 332 | 213 | 232 | 191 | 185 | 165 | 190 | 205 | 407 | 806.61 | 597 | 433 | 496 | 416 | 405 | 375 | 455 | 464 | 622 |
| 456.79 | 332 | 219 | 229 | 195 | 180 | 162 | 189 | 202 | 394 | 806.93 | 590 | 421 | 482 | 412 | 401 |     |     |     |     |

|        |     |     |     |     |     |     |     |     |     |        |     |     |     |     |     |     |     |     |     |
|--------|-----|-----|-----|-----|-----|-----|-----|-----|-----|--------|-----|-----|-----|-----|-----|-----|-----|-----|-----|
| 460.41 | 346 | 229 | 239 | 204 | 197 | 174 | 201 | 221 | 413 | 810.13 | 586 | 413 | 496 | 413 | 403 | 362 | 454 | 444 | 629 |
| 460.78 | 349 | 226 | 246 | 203 | 192 | 171 | 196 | 218 | 428 | 810.45 | 576 | 400 | 488 | 404 | 397 | 371 | 454 | 447 | 625 |
| 461.14 | 365 | 225 | 252 | 200 | 204 | 173 | 203 | 230 | 422 | 810.77 | 586 | 407 | 492 | 420 | 398 | 370 | 476 | 448 | 622 |
| 461.5  | 366 | 228 | 250 | 204 | 195 | 175 | 212 | 228 | 435 | 811.09 | 581 | 406 | 473 | 412 | 395 | 353 | 457 | 442 | 627 |
| 461.86 | 357 | 227 | 234 | 195 | 195 | 173 | 202 | 227 | 418 | 811.41 | 586 | 409 | 476 | 410 | 394 | 365 | 452 | 446 | 609 |
| 462.22 | 338 | 232 | 237 | 196 | 197 | 181 | 200 | 214 | 418 | 811.73 | 572 | 410 | 483 | 402 | 385 | 367 | 466 | 449 | 619 |
| 462.58 | 369 | 240 | 247 | 204 | 198 | 183 | 212 | 229 | 445 | 812.05 | 574 | 408 | 492 | 407 | 391 | 372 | 465 | 441 | 627 |
| 462.95 | 362 | 238 | 244 | 202 | 199 | 179 | 212 | 229 | 442 | 812.36 | 573 | 405 | 491 | 408 | 401 | 367 | 447 | 460 | 626 |
| 463.31 | 379 | 240 | 254 | 199 | 202 | 188 | 209 | 232 | 447 | 812.68 | 574 | 411 | 471 | 401 | 398 | 359 | 449 | 457 | 612 |
| 463.67 | 384 | 242 | 254 | 209 | 208 | 188 | 222 | 238 | 458 | 813    | 578 | 415 | 487 | 408 | 396 | 370 | 458 | 449 | 608 |
| 464.03 | 367 | 238 | 253 | 204 | 205 | 185 | 214 | 234 | 447 | 813.32 | 557 | 404 | 471 | 396 | 391 | 367 | 447 | 442 | 609 |
| 464.39 | 377 | 244 | 255 | 200 | 206 | 183 | 215 | 237 | 465 | 813.64 | 567 | 411 | 469 | 405 | 389 | 365 | 450 | 441 | 611 |
| 464.75 | 404 | 244 | 259 | 207 | 209 | 187 | 220 | 230 | 459 | 813.96 | 571 | 415 | 465 | 398 | 398 | 358 | 445 | 451 | 606 |
| 465.11 | 382 | 241 | 256 | 206 | 214 | 186 | 220 | 230 | 461 | 814.28 | 561 | 404 | 477 | 396 | 385 | 358 | 457 | 438 | 597 |
| 465.48 | 398 | 245 | 268 | 212 | 223 | 201 | 232 | 251 | 464 | 814.6  | 564 | 404 | 460 | 397 | 399 | 364 | 455 | 451 | 617 |
| 465.84 | 386 | 248 | 257 | 209 | 213 | 187 | 216 | 244 | 455 | 814.91 | 561 | 408 | 471 | 398 | 384 | 362 | 441 | 444 | 614 |
| 466.2  | 381 | 244 | 260 | 207 | 217 | 190 | 232 | 248 | 468 | 815.23 | 560 | 398 | 474 | 401 | 395 | 366 | 440 | 431 | 600 |
| 466.56 | 411 | 248 | 268 | 212 | 219 | 189 | 222 | 251 | 467 | 815.55 | 562 | 407 | 464 | 396 | 386 | 364 | 440 | 441 | 602 |
| 466.92 | 395 | 243 | 264 | 213 | 216 | 199 | 223 | 246 | 466 | 815.87 | 564 | 407 | 471 | 398 | 396 | 360 | 450 | 444 | 604 |
| 467.28 | 419 | 252 | 271 | 218 | 224 | 200 | 236 | 267 | 490 | 816.19 | 561 | 396 | 462 | 394 | 380 | 352 | 434 | 442 | 600 |
| 467.64 | 410 | 251 | 268 | 220 | 222 | 195 | 235 | 251 | 492 | 816.51 | 550 | 405 | 464 | 381 | 396 | 363 | 432 | 432 | 594 |
| 468    | 409 | 249 | 269 | 218 | 229 | 194 | 231 | 258 | 480 | 816.82 | 542 | 409 | 462 | 402 | 377 | 346 | 441 | 426 | 599 |
| 468.37 | 411 | 252 | 274 | 215 | 226 | 189 | 231 | 255 | 487 | 817.14 | 550 | 395 | 471 | 391 | 378 | 365 | 433 | 433 | 605 |
| 468.73 | 435 | 254 | 277 | 219 | 238 | 210 | 247 | 269 | 493 | 817.46 | 559 | 404 | 456 | 391 | 379 | 355 | 442 | 424 | 588 |
| 469.09 | 422 | 258 | 280 | 218 | 225 | 194 | 233 | 256 | 501 | 817.78 | 555 | 390 | 463 | 395 | 382 | 357 | 430 | 419 | 593 |
| 469.45 | 422 | 258 | 281 | 217 | 231 | 202 | 236 | 254 | 510 | 818.1  | 548 | 396 | 461 | 395 | 372 | 358 | 434 | 423 | 595 |
| 469.81 | 440 | 254 | 280 | 218 | 238 | 213 | 247 | 270 | 514 | 818.42 | 540 | 396 | 460 | 380 | 374 | 358 | 431 | 435 | 585 |
| 470.17 | 430 | 255 | 283 | 223 | 222 | 201 | 233 | 258 | 499 | 818.73 | 547 | 394 | 462 | 392 | 382 | 349 | 426 | 428 | 593 |
| 470.53 | 429 | 260 | 284 | 221 | 237 | 210 | 230 | 269 | 514 | 819.05 | 540 | 404 | 457 | 391 | 379 | 357 | 434 | 431 | 575 |
| 470.89 | 452 | 262 | 288 | 226 | 238 | 212 | 250 | 273 | 535 | 819.37 | 545 | 400 | 454 | 390 | 375 | 352 | 428 | 425 | 574 |
| 471.25 | 443 | 262 | 280 | 219 | 236 | 210 | 251 | 269 | 523 | 819.69 | 558 | 401 | 459 | 388 | 378 | 344 | 435 | 433 | 569 |
| 471.61 | 457 | 272 | 303 | 226 | 246 | 218 | 253 | 272 | 532 | 820    | 548 | 393 | 461 | 387 | 384 | 348 | 427 | 421 | 582 |
| 471.97 | 446 | 263 | 284 | 229 | 242 | 208 | 256 | 270 | 528 | 820.32 | 548 | 393 | 454 | 383 | 377 | 342 | 432 | 415 | 579 |
| 472.34 | 446 | 271 | 291 | 226 | 236 | 212 | 259 | 271 | 527 | 820.64 | 536 | 393 | 455 | 381 | 378 | 351 | 430 | 430 | 584 |
| 472.7  | 448 | 275 | 286 | 229 | 245 | 210 | 248 | 272 | 528 | 820.96 | 548 | 398 | 455 | 391 | 382 | 345 | 432 | 423 | 585 |
| 473.06 | 472 | 278 | 299 | 242 | 253 | 220 | 251 | 299 | 565 | 821.28 | 541 | 389 | 439 | 380 | 383 | 357 | 435 | 418 | 581 |
| 473.42 | 455 | 264 | 283 | 225 | 234 | 221 | 264 | 285 | 534 | 821.59 | 539 | 388 | 458 | 380 | 372 | 355 | 413 | 420 | 576 |
| 473.78 | 467 | 282 | 307 | 240 | 259 | 228 | 264 | 291 | 546 | 821.91 | 541 | 389 | 452 | 393 | 368 | 338 | 421 | 422 | 568 |
| 474.14 | 475 | 281 | 306 | 238 | 246 | 217 | 272 | 292 | 568 | 822.23 | 526 | 383 | 456 | 380 | 376 | 340 | 417 | 425 | 568 |
| 474.5  | 474 | 278 | 304 | 237 | 260 | 219 | 279 | 297 | 567 | 822.55 | 541 | 381 | 462 | 385 | 382 | 338 | 430 | 431 | 570 |
| 474.86 | 471 | 281 | 305 | 233 | 258 | 229 | 277 | 299 | 558 | 822.86 | 528 | 388 | 441 | 376 | 364 | 343 | 420 | 406 | 582 |
| 475.22 | 491 | 290 | 306 | 239 | 264 | 235 | 280 | 292 | 585 | 823.18 | 528 | 393 | 444 | 394 | 383 | 343 | 432 | 417 | 572 |
| 475.58 | 493 | 292 | 319 | 229 | 261 | 229 | 275 | 297 | 582 | 823.5  | 523 | 388 | 454 | 375 | 367 | 341 | 428 | 416 | 566 |
| 475.94 | 504 | 290 | 324 | 245 | 270 | 241 | 286 | 310 | 603 | 823.81 | 530 | 389 | 434 | 379 | 367 | 334 | 417 | 417 | 568 |
| 476.3  | 516 | 290 | 321 | 246 | 267 | 241 | 291 | 322 | 609 | 824.13 | 539 | 388 | 457 | 369 | 369 | 354 | 428 | 421 | 572 |
| 476.66 | 501 | 287 | 315 | 238 | 263 | 229 | 280 | 311 | 590 | 824.45 | 529 | 385 | 446 | 372 | 364 | 338 | 408 | 421 | 560 |
| 477.02 | 522 | 299 | 319 | 247 | 271 | 240 | 299 | 320 | 608 | 824.77 | 524 | 382 | 442 | 384 | 358 | 331 | 417 | 416 | 570 |
| 477.38 | 521 | 298 | 318 | 246 | 270 | 236 | 284 | 321 | 624 | 825.08 | 538 | 385 | 444 | 380 | 366 | 342 | 425 | 401 | 574 |
| 477.74 | 538 | 297 | 333 | 255 | 274 | 242 | 298 | 327 | 633 | 825.4  | 533 | 382 | 438 | 374 | 368 | 339 | 415 | 419 | 575 |
| 478.1  | 544 | 299 | 328 | 255 | 282 | 241 | 298 | 323 | 630 | 825.72 | 524 | 376 | 438 | 386 | 370 | 341 | 414 | 400 | 554 |
| 478.46 | 531 | 306 | 329 | 259 | 284 | 243 | 302 | 320 | 630 | 826.03 | 522 | 379 | 445 | 365 | 365 | 337 | 411 | 417 | 568 |
| 478.82 | 534 | 301 | 327 | 251 | 278 | 248 | 304 | 333 | 615 | 826.35 | 526 | 390 | 447 | 373 | 360 | 327 | 412 | 404 | 562 |
| 479.18 | 538 | 308 | 343 | 251 | 290 | 258 | 316 | 337 | 658 | 826.67 | 524 | 382 | 445 | 383 | 358 | 330 | 411 | 409 | 560 |
| 479.54 | 547 | 313 | 342 | 251 | 282 | 256 | 309 | 329 | 662 | 826.98 | 523 | 390 | 440 | 373 | 369 | 342 | 419 | 407 | 567 |
| 479.9  | 531 | 296 | 331 | 252 | 273 | 252 | 300 | 330 | 637 | 827.3  | 539 | 391 | 440 | 380 | 380 | 355 | 425 | 414 | 569 |
| 480.26 | 556 | 315 | 353 | 260 | 293 | 255 | 311 | 348 | 670 | 827.62 | 505 | 375 | 427 | 373 | 363 | 328 | 397 | 406 | 559 |
| 480.62 | 561 | 327 | 342 | 260 | 296 | 251 | 329 | 349 | 690 | 827.93 | 519 | 376 | 430 | 374 | 358 | 333 | 405 | 402 | 560 |
| 480.98 | 572 | 318 | 352 | 258 | 301 | 254 | 322 | 346 | 680 | 828.25 | 508 | 377 | 445 | 360 | 357 | 332 | 410 | 402 | 545 |
| 481.34 | 566 | 317 | 363 | 263 | 297 | 264 | 324 | 355 | 691 | 828.57 | 527 | 379 | 443 | 372 | 368 | 338 | 407 | 421 | 561 |
| 481.7  | 561 | 321 | 342 | 263 | 294 | 256 | 318 | 352 | 674 | 828.88 | 525 | 376 | 435 | 366 | 362 | 332 | 408 | 407 | 554 |
| 482.06 | 566 | 318 | 355 | 267 | 296 | 268 | 322 | 364 | 688 | 829.2  | 514 | 375 | 426 | 373 | 350 | 329 | 401 | 398 | 544 |
| 482.42 | 601 | 330 | 358 | 278 | 316 | 272 | 345 | 368 | 705 | 829.52 | 516 | 375 | 440 | 372 | 359 | 327 | 407 | 407 | 553 |
| 482.78 | 616 | 347 | 380 | 274 | 321 | 295 | 359 | 375 | 724 | 829.83 | 513 | 364 | 435 | 371 | 363 | 328 | 410 | 399 | 545 |
| 483.14 | 612 | 334 | 371 | 278 | 307 | 272 | 346 | 372 | 724 | 830.15 | 500 | 368 | 437 | 378 | 360 | 327 | 416 | 407 | 548 |
| 483.5  | 618 | 328 | 371 | 275 | 319 | 272 | 351 | 371 | 731 | 830.46 | 499 | 375 | 423 | 371 | 353 | 328 | 400 | 413 | 549 |
| 483.86 | 595 | 340 | 375 | 274 | 317 | 279 | 348 | 357 | 723 | 830.78 | 521 | 372 | 435 | 381 | 358 | 326 | 408 | 404 | 544 |
| 484.22 | 602 | 333 | 382 | 277 | 312 | 267 | 353 | 367 | 732 | 831.1  | 503 | 378 | 428 | 356 | 355 | 328 | 406 | 390 | 545 |
| 484.58 | 618 | 339 | 377 | 272 | 314 | 281 | 356 | 380 | 734 | 831.41 | 510 | 375 | 425 | 373 | 351 | 323 | 393 | 402 | 544 |
| 484.94 | 599 | 333 | 377 | 276 | 316 | 275 | 347 | 368 | 728 | 831.73 | 499 | 377 | 425 | 371 | 362 | 330 | 401 | 400 | 530 |
| 485.3  | 618 | 345 | 374 | 277 | 327 | 277 | 352 | 380 | 742 | 832.04 | 514 | 374 | 427 | 372 | 362 | 327 | 405 | 403 | 542 |
| 485.66 | 632 | 345 | 375 | 278 | 336 | 299 | 372 | 382 | 755 | 832.36 | 502 | 370 | 429 | 365 | 353 | 326 | 396 | 393 | 534 |
| 486.02 | 620 | 337 | 377 | 274 | 330 | 281 | 356 | 386 | 736 | 832.68 | 502 | 371 | 428 | 362 | 344 | 322 | 400 | 398 | 543 |
| 486.38 | 663 | 349 | 396 | 286 | 341 | 289 | 382 | 399 | 790 | 832.99 | 513 | 369 | 422 | 366 | 362 | 327 |     |     |     |

|        |     |     |     |     |     |     |     |     |      |        |     |     |     |     |     |     |     |     |     |
|--------|-----|-----|-----|-----|-----|-----|-----|-----|------|--------|-----|-----|-----|-----|-----|-----|-----|-----|-----|
| 489.97 | 685 | 376 | 410 | 290 | 356 | 308 | 399 | 418 | 824  | 836.15 | 481 | 365 | 413 | 355 | 352 | 316 | 386 | 387 | 534 |
| 490.33 | 683 | 378 | 414 | 297 | 352 | 308 | 398 | 424 | 821  | 836.46 | 476 | 365 | 407 | 356 | 336 | 324 | 377 | 389 | 527 |
| 490.69 | 703 | 369 | 415 | 303 | 345 | 312 | 403 | 416 | 844  | 836.78 | 490 | 370 | 417 | 358 | 345 | 314 | 385 | 381 | 510 |
| 491.05 | 703 | 365 | 431 | 301 | 359 | 323 | 414 | 443 | 820  | 837.09 | 485 | 350 | 414 | 354 | 330 | 326 | 380 | 390 | 526 |
| 491.4  | 704 | 375 | 415 | 297 | 355 | 321 | 412 | 424 | 830  | 837.41 | 477 | 353 | 412 | 357 | 332 | 308 | 384 | 384 | 515 |
| 491.76 | 719 | 390 | 439 | 309 | 376 | 336 | 420 | 440 | 862  | 837.72 | 499 | 353 | 404 | 356 | 330 | 308 | 381 | 381 | 510 |
| 492.12 | 722 | 389 | 425 | 306 | 371 | 317 | 412 | 441 | 859  | 838.04 | 474 | 362 | 404 | 354 | 347 | 316 | 380 | 385 | 508 |
| 492.48 | 723 | 372 | 420 | 313 | 358 | 313 | 416 | 440 | 869  | 838.35 | 502 | 351 | 420 | 360 | 338 | 316 | 386 | 386 | 532 |
| 492.84 | 717 | 380 | 422 | 311 | 368 | 322 | 409 | 429 | 860  | 838.67 | 493 | 353 | 415 | 351 | 338 | 311 | 389 | 382 | 529 |
| 493.2  | 748 | 402 | 445 | 317 | 392 | 337 | 445 | 452 | 870  | 838.98 | 480 | 362 | 407 | 346 | 341 | 312 | 376 | 378 | 524 |
| 493.56 | 730 | 394 | 436 | 308 | 378 | 313 | 422 | 432 | 879  | 839.3  | 480 | 363 | 407 | 350 | 334 | 304 | 373 | 374 | 522 |
| 493.92 | 738 | 388 | 444 | 315 | 381 | 335 | 421 | 446 | 885  | 839.61 | 480 | 361 | 402 | 341 | 327 | 307 | 375 | 375 | 502 |
| 494.27 | 739 | 380 | 447 | 315 | 378 | 319 | 436 | 457 | 889  | 839.93 | 469 | 356 | 411 | 359 | 331 | 309 | 379 | 382 | 513 |
| 494.63 | 740 | 391 | 443 | 318 | 388 | 332 | 439 | 452 | 871  | 840.24 | 475 | 358 | 416 | 361 | 338 | 314 | 377 | 383 | 506 |
| 494.99 | 754 | 399 | 443 | 317 | 390 | 332 | 435 | 461 | 897  | 840.55 | 480 | 360 | 412 | 356 | 332 | 305 | 371 | 376 | 512 |
| 495.35 | 755 | 389 | 445 | 327 | 381 | 331 | 436 | 458 | 912  | 840.87 | 470 | 360 | 409 | 348 | 336 | 308 | 371 | 382 | 520 |
| 495.71 | 745 | 392 | 449 | 313 | 389 | 328 | 452 | 449 | 901  | 841.18 | 459 | 360 | 401 | 350 | 329 | 314 | 378 | 374 | 506 |
| 496.07 | 768 | 394 | 452 | 315 | 394 | 346 | 440 | 464 | 913  | 841.5  | 462 | 354 | 411 | 361 | 331 | 312 | 383 | 368 | 513 |
| 496.42 | 759 | 405 | 449 | 316 | 384 | 336 | 441 | 453 | 907  | 841.81 | 475 | 358 | 404 | 347 | 324 | 295 | 380 | 373 | 511 |
| 496.78 | 772 | 400 | 460 | 323 | 393 | 342 | 441 | 464 | 902  | 842.13 | 468 | 350 | 408 | 351 | 314 | 307 | 379 | 365 | 503 |
| 497.14 | 781 | 421 | 461 | 321 | 400 | 333 | 450 | 465 | 903  | 842.44 | 468 | 356 | 405 | 348 | 326 | 310 | 371 | 366 | 498 |
| 497.5  | 780 | 408 | 454 | 325 | 389 | 339 | 439 | 465 | 938  | 842.76 | 470 | 349 | 407 | 346 | 328 | 302 | 370 | 380 | 498 |
| 497.86 | 775 | 404 | 459 | 328 | 401 | 346 | 458 | 468 | 913  | 843.07 | 462 | 348 | 406 | 353 | 328 | 307 | 371 | 369 | 496 |
| 498.22 | 787 | 405 | 455 | 326 | 394 | 341 | 448 | 465 | 930  | 843.38 | 463 | 359 | 401 | 350 | 325 | 307 | 364 | 372 | 507 |
| 498.57 | 800 | 415 | 458 | 334 | 388 | 357 | 457 | 469 | 923  | 843.7  | 459 | 348 | 396 | 350 | 321 | 304 | 357 | 366 | 512 |
| 498.93 | 790 | 412 | 458 | 335 | 397 | 351 | 460 | 469 | 915  | 844.01 | 466 | 343 | 394 | 340 | 322 | 304 | 359 | 369 | 499 |
| 499.29 | 803 | 427 | 472 | 332 | 401 | 353 | 459 | 473 | 941  | 844.33 | 459 | 346 | 398 | 348 | 322 | 304 | 367 | 368 | 485 |
| 499.65 | 801 | 412 | 468 | 335 | 411 | 352 | 456 | 495 | 937  | 844.64 | 457 | 342 | 402 | 336 | 328 | 304 | 362 | 376 | 490 |
| 500.01 | 793 | 429 | 473 | 332 | 410 | 362 | 463 | 483 | 937  | 844.95 | 465 | 337 | 395 | 348 | 321 | 301 | 358 | 361 | 496 |
| 500.36 | 802 | 418 | 479 | 325 | 410 | 351 | 477 | 485 | 946  | 845.27 | 462 | 341 | 395 | 339 | 326 | 304 | 375 | 362 | 497 |
| 500.72 | 810 | 422 | 464 | 331 | 406 | 353 | 460 | 499 | 941  | 845.58 | 462 | 347 | 400 | 339 | 317 | 300 | 367 | 368 | 491 |
| 501.08 | 799 | 424 | 466 | 335 | 396 | 361 | 469 | 481 | 964  | 845.89 | 455 | 343 | 393 | 339 | 319 | 287 | 365 | 365 | 488 |
| 501.44 | 794 | 417 | 486 | 332 | 412 | 363 | 468 | 479 | 955  | 846.21 | 458 | 341 | 396 | 350 | 314 | 305 | 353 | 377 | 499 |
| 501.8  | 798 | 420 | 487 | 331 | 409 | 356 | 467 | 489 | 970  | 846.52 | 466 | 344 | 389 | 336 | 312 | 290 | 362 | 373 | 490 |
| 502.15 | 817 | 428 | 480 | 339 | 411 | 366 | 477 | 480 | 969  | 846.83 | 459 | 349 | 402 | 329 | 335 | 304 | 358 | 354 | 494 |
| 502.51 | 818 | 428 | 484 | 338 | 414 | 363 | 482 | 486 | 976  | 847.15 | 461 | 340 | 385 | 334 | 320 | 300 | 357 | 352 | 491 |
| 502.87 | 802 | 424 | 476 | 331 | 405 | 355 | 477 | 500 | 969  | 847.46 | 440 | 339 | 386 | 352 | 317 | 288 | 359 | 370 | 499 |
| 503.23 | 813 | 436 | 498 | 343 | 406 | 369 | 466 | 500 | 987  | 847.78 | 453 | 347 | 392 | 326 | 318 | 299 | 360 | 366 | 489 |
| 503.58 | 832 | 430 | 497 | 336 | 404 | 368 | 491 | 501 | 977  | 848.09 | 458 | 337 | 394 | 338 | 317 | 285 | 370 | 355 | 481 |
| 503.94 | 828 | 433 | 470 | 345 | 418 | 366 | 491 | 502 | 965  | 848.4  | 439 | 339 | 394 | 333 | 310 | 294 | 344 | 364 | 497 |
| 504.3  | 817 | 428 | 501 | 353 | 423 | 362 | 480 | 507 | 1003 | 848.72 | 437 | 339 | 397 | 343 | 318 | 294 | 350 | 368 | 492 |
| 504.66 | 847 | 440 | 488 | 348 | 421 | 368 | 485 | 500 | 1006 | 849.03 | 440 | 332 | 389 | 336 | 316 | 297 | 357 | 344 | 482 |
| 505.01 | 825 | 438 | 486 | 348 | 431 | 366 | 491 | 506 | 989  | 849.34 | 445 | 336 | 394 | 334 | 309 | 287 | 353 | 359 | 495 |
| 505.37 | 825 | 450 | 497 | 342 | 430 | 373 | 488 | 497 | 1001 | 849.65 | 443 | 341 | 384 | 340 | 310 | 285 | 362 | 365 | 479 |
| 505.73 | 850 | 430 | 493 | 338 | 426 | 380 | 488 | 501 | 997  | 849.97 | 447 | 353 | 386 | 343 | 320 | 302 | 357 | 361 | 483 |
| 506.09 | 851 | 431 | 488 | 346 | 420 | 370 | 490 | 498 | 979  | 850.28 | 436 | 327 | 383 | 333 | 305 | 287 | 343 | 344 | 469 |
| 506.44 | 837 | 438 | 503 | 347 | 415 | 369 | 496 | 511 | 999  | 850.59 | 440 | 336 | 382 | 334 | 312 | 293 | 354 | 349 | 486 |
| 506.8  | 848 | 438 | 501 | 351 | 429 | 380 | 495 | 512 | 1008 | 850.91 | 442 | 336 | 379 | 336 | 301 | 291 | 346 | 357 | 482 |
| 507.16 | 868 | 438 | 510 | 350 | 425 | 376 | 502 | 502 | 1015 | 851.22 | 442 | 329 | 375 | 325 | 299 | 280 | 342 | 348 | 476 |
| 507.52 | 854 | 450 | 502 | 343 | 422 | 370 | 493 | 506 | 1010 | 851.53 | 436 | 332 | 378 | 327 | 309 | 292 | 344 | 355 | 475 |
| 507.87 | 861 | 445 | 499 | 352 | 434 | 376 | 514 | 524 | 1017 | 851.84 | 437 | 330 | 367 | 327 | 298 | 288 | 337 | 344 | 479 |
| 508.23 | 868 | 446 | 500 | 364 | 430 | 381 | 507 | 508 | 1008 | 852.16 | 430 | 333 | 383 | 328 | 296 | 292 | 342 | 346 | 461 |
| 508.59 | 871 | 441 | 506 | 348 | 432 | 373 | 511 | 528 | 1024 | 852.47 | 429 | 336 | 379 | 328 | 316 | 285 | 348 | 346 | 485 |
| 508.95 | 864 | 437 | 509 | 345 | 425 | 380 | 507 | 517 | 1018 | 852.78 | 431 | 328 | 375 | 329 | 303 | 284 | 344 | 349 | 462 |
| 509.3  | 870 | 441 | 509 | 359 | 443 | 382 | 510 | 527 | 1034 | 853.09 | 434 | 320 | 372 | 326 | 309 | 272 | 331 | 336 | 479 |
| 509.66 | 860 | 452 | 511 | 351 | 425 | 384 | 496 | 533 | 1026 | 853.41 | 439 | 320 | 372 | 331 | 313 | 285 | 348 | 348 | 472 |
| 510.02 | 868 | 445 | 501 | 358 | 442 | 383 | 505 | 530 | 1022 | 853.72 | 419 | 334 | 370 | 315 | 298 | 270 | 338 | 341 | 461 |
| 510.37 | 877 | 447 | 502 | 359 | 438 | 385 | 505 | 527 | 1052 | 854.03 | 431 | 325 | 374 | 320 | 298 | 278 | 337 | 339 | 467 |
| 510.73 | 879 | 439 | 503 | 361 | 441 | 385 | 498 | 529 | 1045 | 854.34 | 427 | 329 | 379 | 327 | 304 | 287 | 345 | 346 | 466 |
| 511.09 | 878 | 457 | 509 | 349 | 439 | 389 | 513 | 523 | 1044 | 854.66 | 428 | 328 | 372 | 319 | 293 | 283 | 339 | 342 | 464 |
| 511.44 | 869 | 449 | 511 | 348 | 439 | 385 | 505 | 524 | 1044 | 854.97 | 426 | 320 | 363 | 322 | 303 | 276 | 351 | 337 | 456 |
| 511.8  | 880 | 438 | 520 | 362 | 442 | 393 | 516 | 524 | 1050 | 855.28 | 419 | 321 | 368 | 318 | 296 | 280 | 338 | 335 | 468 |
| 512.16 | 914 | 462 | 521 | 358 | 441 | 398 | 514 | 535 | 1056 | 855.59 | 429 | 320 | 375 | 324 | 301 | 282 | 336 | 335 | 463 |
| 512.51 | 893 | 464 | 512 | 364 | 431 | 391 | 517 | 523 | 1058 | 855.91 | 419 | 331 | 368 | 326 | 303 | 280 | 336 | 336 | 459 |
| 512.87 | 904 | 466 | 516 | 356 | 446 | 392 | 527 | 530 | 1071 | 856.22 | 411 | 325 | 367 | 314 | 306 | 275 | 337 | 335 | 469 |
| 513.23 | 912 | 451 | 522 | 348 | 445 | 388 | 527 | 527 | 1055 | 856.53 | 437 | 327 | 378 | 336 | 322 | 296 | 349 | 342 | 475 |
| 513.58 | 889 | 458 | 508 | 359 | 449 | 392 | 512 | 533 | 1069 | 856.84 | 414 | 326 | 363 | 324 | 302 | 275 | 343 | 338 | 457 |
| 513.94 | 902 | 457 | 515 | 358 | 449 | 386 | 506 | 536 | 1083 | 857.15 | 427 | 328 | 374 | 314 | 300 | 272 | 334 | 331 | 449 |
| 514.3  | 891 | 470 | 513 | 349 | 455 | 389 | 520 | 532 | 1078 | 857.46 | 418 | 328 | 371 | 320 | 292 | 285 | 326 | 325 | 442 |
| 514.65 | 929 | 458 | 512 | 345 | 452 | 386 | 531 | 526 | 1090 | 857.78 | 415 | 319 | 373 | 332 | 291 | 269 | 330 | 333 | 462 |
| 515.01 | 909 | 463 | 511 | 356 | 444 | 396 | 530 | 533 | 1066 | 858.09 | 413 | 322 | 360 | 322 | 299 | 265 | 331 | 329 | 447 |
| 515.37 | 914 | 457 | 510 | 356 | 447 | 397 | 534 | 536 | 1071 | 858.4  | 397 | 321 | 362 | 320 | 287 | 275 | 323 | 342 | 450 |
| 515.72 | 926 | 464 | 526 | 360 | 457 | 402 | 540 | 559 | 1087 | 858.71 | 404 |     |     |     |     |     |     |     |     |

|        |      |     |     |     |     |     |     |     |      |        |     |     |     |     |     |     |     |     |     |
|--------|------|-----|-----|-----|-----|-----|-----|-----|------|--------|-----|-----|-----|-----|-----|-----|-----|-----|-----|
| 519.29 | 947  | 441 | 519 | 342 | 460 | 402 | 509 | 535 | 1106 | 861.82 | 397 | 316 | 360 | 311 | 296 | 264 | 322 | 325 | 444 |
| 519.64 | 947  | 440 | 501 | 344 | 443 | 382 | 509 | 532 | 1115 | 862.14 | 386 | 305 | 354 | 305 | 274 | 264 | 318 | 322 | 443 |
| 520    | 963  | 452 | 500 | 341 | 448 | 385 | 528 | 553 | 1103 | 862.45 | 392 | 308 | 346 | 316 | 284 | 271 | 310 | 310 | 426 |
| 520.35 | 941  | 439 | 505 | 337 | 470 | 377 | 516 | 536 | 1123 | 862.76 | 395 | 305 | 347 | 309 | 279 | 269 | 316 | 320 | 434 |
| 520.71 | 963  | 444 | 501 | 334 | 436 | 388 | 506 | 535 | 1122 | 863.07 | 392 | 303 | 360 | 300 | 285 | 280 | 315 | 317 | 434 |
| 521.07 | 967  | 449 | 492 | 335 | 443 | 384 | 520 | 541 | 1119 | 863.38 | 384 | 316 | 361 | 300 | 280 | 258 | 311 | 320 | 430 |
| 521.42 | 967  | 449 | 496 | 336 | 441 | 378 | 504 | 550 | 1130 | 863.69 | 397 | 312 | 350 | 307 | 283 | 268 | 314 | 316 | 429 |
| 521.78 | 975  | 445 | 512 | 333 | 443 | 369 | 519 | 532 | 1107 | 864    | 395 | 297 | 352 | 303 | 276 | 256 | 316 | 311 | 421 |
| 522.13 | 964  | 444 | 494 | 324 | 451 | 376 | 507 | 522 | 1105 | 864.31 | 386 | 309 | 350 | 306 | 288 | 262 | 310 | 318 | 436 |
| 522.49 | 968  | 447 | 507 | 328 | 444 | 372 | 509 | 529 | 1120 | 864.62 | 390 | 307 | 355 | 301 | 271 | 260 | 318 | 302 | 431 |
| 522.84 | 967  | 450 | 494 | 322 | 449 | 379 | 500 | 535 | 1140 | 864.93 | 380 | 306 | 330 | 318 | 269 | 256 | 314 | 313 | 438 |
| 523.2  | 981  | 443 | 486 | 316 | 448 | 378 | 504 | 530 | 1118 | 865.24 | 375 | 299 | 343 | 293 | 272 | 254 | 300 | 308 | 413 |
| 523.56 | 969  | 428 | 504 | 318 | 446 | 376 | 504 | 528 | 1148 | 865.55 | 365 | 299 | 345 | 307 | 280 | 255 | 299 | 303 | 418 |
| 523.91 | 1003 | 437 | 489 | 319 | 442 | 375 | 504 | 524 | 1149 | 865.86 | 381 | 303 | 334 | 306 | 276 | 262 | 294 | 311 | 422 |
| 524.27 | 992  | 436 | 500 | 319 | 443 | 374 | 508 | 530 | 1141 | 866.17 | 390 | 308 | 343 | 307 | 270 | 256 | 297 | 308 | 417 |
| 524.62 | 971  | 431 | 485 | 306 | 454 | 370 | 495 | 525 | 1132 | 866.48 | 379 | 305 | 337 | 295 | 278 | 253 | 302 | 305 | 426 |
| 524.98 | 969  | 415 | 478 | 311 | 442 | 371 | 487 | 510 | 1131 | 866.79 | 377 | 303 | 348 | 302 | 268 | 252 | 310 | 307 | 421 |
| 525.33 | 977  | 426 | 480 | 301 | 445 | 364 | 498 | 522 | 1140 | 867.1  | 376 | 309 | 345 | 299 | 272 | 255 | 309 | 302 | 404 |
| 525.69 | 998  | 424 | 478 | 304 | 440 | 353 | 494 | 523 | 1147 | 867.41 | 375 | 304 | 342 | 298 | 285 | 256 | 311 | 311 | 409 |
| 526.04 | 991  | 417 | 470 | 305 | 422 | 359 | 472 | 512 | 1147 | 867.72 | 370 | 296 | 334 | 292 | 270 | 251 | 308 | 300 | 416 |
| 526.4  | 985  | 413 | 463 | 306 | 437 | 351 | 477 | 510 | 1144 | 868.04 | 373 | 296 | 327 | 297 | 270 | 251 | 302 | 302 | 423 |
| 526.76 | 972  | 416 | 476 | 297 | 432 | 358 | 488 | 506 | 1157 | 868.35 | 363 | 293 | 334 | 294 | 268 | 252 | 290 | 299 | 410 |
| 527.11 | 993  | 416 | 464 | 295 | 439 | 357 | 473 | 502 | 1158 | 868.65 | 355 | 296 | 333 | 300 | 271 | 254 | 298 | 299 | 411 |
| 527.47 | 995  | 413 | 464 | 286 | 426 | 350 | 456 | 508 | 1161 | 868.96 | 354 | 299 | 331 | 288 | 265 | 247 | 298 | 295 | 403 |
| 527.82 | 1013 | 411 | 465 | 287 | 422 | 358 | 467 | 497 | 1151 | 869.27 | 358 | 303 | 341 | 292 | 271 | 254 | 297 | 300 | 404 |
| 528.18 | 1002 | 421 | 463 | 289 | 425 | 336 | 478 | 514 | 1161 | 869.58 | 360 | 307 | 330 | 297 | 263 | 249 | 291 | 293 | 400 |
| 528.53 | 1010 | 417 | 462 | 284 | 426 | 345 | 464 | 506 | 1145 | 869.89 | 349 | 302 | 325 | 290 | 265 | 246 | 298 | 303 | 403 |
| 528.89 | 1004 | 404 | 441 | 294 | 416 | 334 | 460 | 486 | 1145 | 870.2  | 360 | 293 | 336 | 288 | 255 | 248 | 286 | 300 | 420 |
| 529.24 | 1000 | 416 | 450 | 273 | 423 | 343 | 464 | 486 | 1162 | 870.51 | 352 | 294 | 324 | 291 | 254 | 234 | 288 | 294 | 398 |
| 529.6  | 1026 | 409 | 444 | 282 | 425 | 354 | 454 | 492 | 1149 | 870.82 | 357 | 301 | 328 | 294 | 269 | 245 | 285 | 289 | 397 |
| 529.95 | 1008 | 399 | 449 | 276 | 413 | 342 | 468 | 501 | 1159 | 871.13 | 350 | 294 | 317 | 289 | 258 | 243 | 289 | 308 | 394 |
| 530.31 | 1022 | 409 | 458 | 278 | 419 | 329 | 446 | 484 | 1182 | 871.44 | 348 | 284 | 321 | 286 | 264 | 243 | 290 | 289 | 389 |
| 530.66 | 1027 | 392 | 445 | 271 | 414 | 330 | 448 | 478 | 1153 | 871.75 | 349 | 287 | 330 | 288 | 253 | 253 | 282 | 287 | 397 |
| 531.02 | 1004 | 398 | 444 | 285 | 418 | 333 | 456 | 478 | 1150 | 872.06 | 356 | 292 | 326 | 293 | 269 | 246 | 295 | 294 | 402 |
| 531.37 | 1012 | 410 | 451 | 270 | 408 | 331 | 455 | 484 | 1169 | 872.37 | 351 | 288 | 324 | 291 | 261 | 249 | 287 | 292 | 392 |
| 531.73 | 1042 | 400 | 437 | 275 | 417 | 325 | 455 | 491 | 1200 | 872.68 | 345 | 286 | 315 | 291 | 257 | 241 | 284 | 291 | 383 |
| 532.08 | 1026 | 384 | 436 | 270 | 400 | 330 | 445 | 483 | 1179 | 872.99 | 341 | 287 | 338 | 282 | 253 | 243 | 284 | 288 | 389 |
| 532.43 | 1055 | 384 | 442 | 282 | 410 | 322 | 450 | 482 | 1208 | 873.3  | 341 | 284 | 314 | 292 | 259 | 246 | 276 | 291 | 393 |
| 532.79 | 1047 | 398 | 420 | 264 | 405 | 319 | 439 | 488 | 1180 | 873.61 | 337 | 282 | 314 | 278 | 250 | 237 | 278 | 280 | 397 |
| 533.14 | 1039 | 385 | 446 | 276 | 406 | 323 | 438 | 486 | 1184 | 873.92 | 349 | 290 | 314 | 292 | 261 | 234 | 278 | 288 | 386 |
| 533.5  | 1054 | 388 | 442 | 270 | 403 | 318 | 431 | 473 | 1189 | 874.22 | 343 | 280 | 311 | 283 | 251 | 232 | 282 | 282 | 384 |
| 533.85 | 1042 | 389 | 428 | 267 | 404 | 319 | 432 | 486 | 1184 | 874.53 | 334 | 283 | 319 | 285 | 253 | 240 | 279 | 283 | 380 |
| 534.21 | 1052 | 384 | 422 | 273 | 406 | 320 | 450 | 476 | 1196 | 874.84 | 341 | 286 | 312 | 278 | 246 | 237 | 272 | 283 | 379 |
| 534.56 | 1056 | 385 | 426 | 266 | 396 | 314 | 435 | 470 | 1185 | 875.15 | 350 | 285 | 311 | 281 | 251 | 230 | 274 | 279 | 376 |
| 534.92 | 1056 | 381 | 435 | 259 | 402 | 320 | 433 | 475 | 1184 | 875.46 | 327 | 278 | 321 | 276 | 250 | 234 | 275 | 278 | 372 |
| 535.27 | 1068 | 379 | 430 | 257 | 404 | 315 | 437 | 466 | 1182 | 875.77 | 340 | 279 | 313 | 273 | 248 | 227 | 269 | 270 | 381 |
| 535.63 | 1045 | 384 | 425 | 266 | 410 | 318 | 432 | 469 | 1199 | 876.08 | 332 | 282 | 319 | 277 | 248 | 224 | 273 | 279 | 362 |
| 535.98 | 1037 | 382 | 424 | 260 | 403 | 311 | 435 | 469 | 1189 | 876.39 | 338 | 279 | 317 | 287 | 251 | 228 | 275 | 273 | 378 |
| 536.33 | 1065 | 385 | 431 | 260 | 402 | 315 | 440 | 483 | 1204 | 876.7  | 323 | 278 | 315 | 279 | 241 | 237 | 263 | 273 | 367 |
| 536.69 | 1048 | 382 | 426 | 261 | 396 | 310 | 420 | 466 | 1160 | 877    | 326 | 275 | 312 | 277 | 247 | 237 | 264 | 274 | 375 |
| 537.04 | 1051 | 382 | 434 | 265 | 404 | 306 | 431 | 467 | 1172 | 877.31 | 324 | 277 | 308 | 272 | 240 | 236 | 256 | 275 | 368 |
| 537.4  | 1073 | 381 | 432 | 271 | 402 | 310 | 430 | 471 | 1181 | 877.62 | 335 | 282 | 307 | 276 | 247 | 236 | 266 | 262 | 372 |
| 537.75 | 1066 | 383 | 422 | 258 | 407 | 318 | 443 | 470 | 1207 | 877.93 | 337 | 272 | 306 | 272 | 244 | 219 | 266 | 270 | 366 |
| 538.11 | 1050 | 378 | 425 | 262 | 407 | 309 | 419 | 456 | 1191 | 878.24 | 329 | 278 | 306 | 280 | 243 | 231 | 281 | 265 | 363 |
| 538.46 | 1056 | 370 | 431 | 254 | 401 | 308 | 430 | 464 | 1193 | 878.55 | 319 | 270 | 302 | 270 | 241 | 241 | 266 | 271 | 367 |
| 538.81 | 1067 | 381 | 423 | 258 | 401 | 306 | 433 | 462 | 1198 | 878.85 | 329 | 277 | 299 | 278 | 243 | 234 | 263 | 265 | 363 |
| 539.17 | 1071 | 375 | 433 | 256 | 397 | 306 | 428 | 462 | 1189 | 879.16 | 320 | 274 | 299 | 268 | 238 | 226 | 264 | 271 | 351 |
| 539.52 | 1079 | 377 | 427 | 258 | 393 | 314 | 426 | 465 | 1216 | 879.47 | 315 | 275 | 307 | 268 | 232 | 228 | 260 | 268 | 360 |
| 539.88 | 1079 | 371 | 432 | 263 | 402 | 310 | 424 | 469 | 1221 | 879.78 | 324 | 268 | 298 | 275 | 237 | 224 | 264 | 259 | 357 |
| 540.23 | 1089 | 377 | 435 | 261 | 399 | 306 | 422 | 464 | 1198 | 880.09 | 313 | 270 | 299 | 258 | 240 | 222 | 258 | 263 | 361 |
| 540.58 | 1074 | 381 | 431 | 262 | 394 | 308 | 421 | 465 | 1225 | 880.39 | 315 | 269 | 294 | 262 | 237 | 212 | 257 | 264 | 350 |
| 540.94 | 1080 | 377 | 436 | 258 | 397 | 312 | 428 | 463 | 1240 | 880.7  | 313 | 273 | 302 | 268 | 227 | 222 | 270 | 263 | 346 |
| 541.29 | 1105 | 382 | 429 | 269 | 397 | 306 | 434 | 473 | 1225 | 881.01 | 313 | 271 | 299 | 262 | 234 | 220 | 252 | 251 | 350 |
| 541.64 | 1072 | 380 | 425 | 266 | 411 | 306 | 432 | 462 | 1209 | 881.32 | 314 | 260 | 297 | 270 | 225 | 217 | 245 | 253 | 346 |
| 542    | 1077 | 389 | 414 | 254 | 407 | 305 | 440 | 469 | 1223 | 881.63 | 305 | 266 | 284 | 266 | 229 | 220 | 257 | 257 | 338 |
| 542.35 | 1094 | 375 | 441 | 263 | 405 | 307 | 436 | 449 | 1196 | 881.93 | 316 | 264 | 295 | 266 | 232 | 217 | 255 | 257 | 353 |
| 542.71 | 1083 | 378 | 429 | 254 | 414 | 317 | 441 | 472 | 1227 | 882.24 | 301 | 263 | 290 | 271 | 232 | 221 | 252 | 262 | 348 |
| 543.06 | 1078 | 384 | 436 | 262 | 398 | 316 | 438 | 469 | 1200 | 882.55 | 304 | 269 | 285 | 264 | 237 | 216 | 249 | 253 | 347 |
| 543.41 | 1100 | 390 | 437 | 269 | 398 | 308 | 430 | 475 | 1231 | 882.86 | 305 | 267 | 290 | 266 | 228 | 219 | 252 | 256 | 342 |
| 543.77 | 1087 | 389 | 439 | 268 | 402 | 316 | 446 | 479 | 1217 | 883.16 | 310 | 257 | 294 | 262 | 231 | 222 | 250 | 256 | 341 |
| 544.12 | 1128 | 384 | 450 | 263 | 407 | 326 | 453 | 476 | 1225 | 883.47 | 311 | 266 | 279 | 267 | 233 | 214 | 244 | 252 | 344 |
| 544.47 | 1103 | 400 | 448 | 267 | 417 | 324 | 451 | 478 | 1229 | 883.78 | 305 | 266 | 294 | 264 | 229 | 214 | 252 | 249 | 337 |
| 544.83 | 1122 |     |     |     |     |     |     |     |      |        |     |     |     |     |     |     |     |     |     |

|        |      |     |     |     |     |     |     |     |      |        |     |     |     |     |     |     |     |     |     |
|--------|------|-----|-----|-----|-----|-----|-----|-----|------|--------|-----|-----|-----|-----|-----|-----|-----|-----|-----|
| 548.36 | 1120 | 407 | 460 | 282 | 424 | 326 | 471 | 498 | 1248 | 887.16 | 293 | 265 | 281 | 259 | 218 | 212 | 246 | 247 | 324 |
| 548.71 | 1107 | 423 | 471 | 283 | 427 | 346 | 489 | 506 | 1259 | 887.46 | 286 | 248 | 284 | 249 | 225 | 207 | 237 | 248 | 318 |
| 549.06 | 1124 | 435 | 468 | 282 | 436 | 348 | 490 | 513 | 1294 | 887.77 | 287 | 260 | 274 | 260 | 212 | 209 | 245 | 245 | 332 |
| 549.42 | 1116 | 426 | 473 | 289 | 432 | 333 | 484 | 514 | 1273 | 888.08 | 290 | 249 | 278 | 246 | 218 | 209 | 240 | 236 | 331 |
| 549.77 | 1137 | 420 | 485 | 294 | 446 | 354 | 483 | 519 | 1273 | 888.38 | 288 | 260 | 283 | 255 | 215 | 208 | 232 | 237 | 326 |
| 550.12 | 1124 | 424 | 489 | 294 | 447 | 355 | 502 | 516 | 1267 | 888.69 | 296 | 248 | 285 | 257 | 216 | 215 | 246 | 236 | 325 |
| 550.48 | 1149 | 431 | 483 | 299 | 445 | 352 | 514 | 536 | 1310 | 889    | 286 | 256 | 279 | 253 | 221 | 205 | 238 | 242 | 322 |
| 550.83 | 1116 | 435 | 486 | 301 | 431 | 360 | 503 | 529 | 1268 | 889.3  | 293 | 259 | 273 | 249 | 219 | 206 | 235 | 246 | 319 |
| 551.18 | 1132 | 425 | 491 | 290 | 443 | 359 | 504 | 517 | 1295 | 889.61 | 285 | 263 | 277 | 258 | 218 | 203 | 238 | 239 | 325 |
| 551.53 | 1146 | 453 | 500 | 295 | 458 | 359 | 503 | 533 | 1289 | 889.91 | 295 | 264 | 282 | 250 | 223 | 211 | 249 | 247 | 336 |
| 551.89 | 1148 | 439 | 490 | 308 | 468 | 367 | 521 | 530 | 1306 | 890.22 | 282 | 245 | 286 | 245 | 212 | 201 | 244 | 240 | 321 |
| 552.24 | 1158 | 454 | 500 | 308 | 462 | 368 | 520 | 536 | 1309 | 890.53 | 281 | 247 | 269 | 247 | 219 | 204 | 231 | 237 | 318 |
| 552.59 | 1140 | 451 | 514 | 315 | 475 | 390 | 531 | 544 | 1317 | 890.83 | 285 | 249 | 276 | 251 | 215 | 202 | 235 | 237 | 319 |
| 552.94 | 1132 | 449 | 511 | 316 | 467 | 380 | 538 | 544 | 1308 | 891.14 | 285 | 249 | 271 | 245 | 217 | 210 | 233 | 236 | 323 |
| 553.3  | 1168 | 450 | 512 | 314 | 463 | 372 | 529 | 559 | 1298 | 891.45 | 282 | 256 | 279 | 246 | 215 | 202 | 236 | 234 | 313 |
| 553.65 | 1148 | 462 | 523 | 316 | 456 | 379 | 527 | 542 | 1343 | 891.75 | 281 | 258 | 279 | 249 | 207 | 202 | 234 | 230 | 312 |
| 554    | 1128 | 454 | 519 | 315 | 456 | 370 | 526 | 552 | 1297 | 892.06 | 285 | 250 | 275 | 251 | 214 | 197 | 237 | 243 | 316 |
| 554.35 | 1152 | 469 | 517 | 321 | 461 | 379 | 545 | 550 | 1348 | 892.36 | 280 | 251 | 270 | 244 | 206 | 199 | 236 | 232 | 319 |
| 554.71 | 1147 | 459 | 522 | 326 | 472 | 390 | 534 | 558 | 1325 | 892.67 | 278 | 250 | 269 | 236 | 217 | 200 | 237 | 230 | 320 |
| 555.06 | 1157 | 461 | 526 | 322 | 482 | 388 | 540 | 557 | 1324 | 892.97 | 283 | 242 | 272 | 241 | 213 | 192 | 226 | 238 | 313 |
| 555.41 | 1159 | 482 | 533 | 324 | 468 | 392 | 548 | 571 | 1338 | 893.28 | 281 | 251 | 272 | 243 | 215 | 202 | 222 | 236 | 325 |
| 555.76 | 1160 | 466 | 521 | 325 | 486 | 394 | 546 | 574 | 1329 | 893.59 | 276 | 240 | 278 | 244 | 212 | 205 | 232 | 229 | 309 |
| 556.12 | 1178 | 474 | 531 | 330 | 475 | 397 | 565 | 559 | 1330 | 893.89 | 278 | 250 | 272 | 246 | 210 | 202 | 219 | 233 | 318 |
| 556.47 | 1155 | 465 | 542 | 324 | 476 | 397 | 556 | 569 | 1337 | 894.2  | 271 | 250 | 274 | 248 | 214 | 200 | 237 | 231 | 312 |
| 556.82 | 1146 | 475 | 534 | 333 | 474 | 397 | 552 | 572 | 1340 | 894.5  | 283 | 248 | 270 | 247 | 218 | 193 | 230 | 235 | 307 |
| 557.17 | 1186 | 494 | 541 | 333 | 487 | 409 | 559 | 576 | 1319 | 894.81 | 267 | 249 | 270 | 248 | 209 | 202 | 224 | 227 | 311 |
| 557.52 | 1195 | 484 | 553 | 340 | 489 | 418 | 577 | 594 | 1370 | 895.11 | 273 | 246 | 268 | 239 | 213 | 197 | 232 | 227 | 315 |
| 557.88 | 1192 | 482 | 551 | 337 | 492 | 417 | 581 | 593 | 1349 | 895.42 | 268 | 245 | 263 | 242 | 215 | 191 | 227 | 225 | 308 |
| 558.23 | 1209 | 491 | 555 | 336 | 494 | 420 | 578 | 589 | 1374 | 895.72 | 276 | 240 | 265 | 245 | 212 | 194 | 226 | 223 | 309 |
| 558.58 | 1187 | 476 | 537 | 337 | 495 | 409 | 575 | 586 | 1360 | 896.03 | 268 | 248 | 272 | 245 | 221 | 196 | 227 | 226 | 307 |
| 558.93 | 1192 | 487 | 550 | 346 | 483 | 410 | 564 | 585 | 1337 | 896.34 | 269 | 246 | 268 | 244 | 212 | 197 | 226 | 232 | 305 |
| 559.28 | 1208 | 494 | 551 | 349 | 506 | 419 | 581 | 593 | 1365 | 896.64 | 269 | 243 | 271 | 241 | 210 | 193 | 218 | 229 | 305 |
| 559.64 | 1186 | 486 | 544 | 346 | 497 | 413 | 592 | 581 | 1375 | 896.95 | 269 | 242 | 274 | 240 | 202 | 196 | 221 | 228 | 310 |
| 559.99 | 1192 | 494 | 541 | 339 | 489 | 421 | 563 | 591 | 1344 | 897.25 | 266 | 240 | 265 | 237 | 204 | 191 | 230 | 230 | 306 |
| 560.34 | 1220 | 498 | 546 | 344 | 509 | 421 | 590 | 592 | 1352 | 897.56 | 285 | 248 | 275 | 247 | 229 | 212 | 239 | 243 | 314 |
| 560.69 | 1190 | 489 | 541 | 346 | 503 | 414 | 595 | 599 | 1383 | 897.86 | 265 | 239 | 266 | 241 | 205 | 201 | 223 | 228 | 320 |
| 561.04 | 1192 | 478 | 539 | 331 | 494 | 422 | 583 | 592 | 1360 | 898.17 | 270 | 242 | 270 | 241 | 210 | 199 | 221 | 236 | 309 |
| 561.39 | 1205 | 493 | 560 | 332 | 507 | 417 | 594 | 594 | 1390 | 898.47 | 271 | 243 | 262 | 245 | 212 | 194 | 225 | 226 | 295 |
| 561.75 | 1226 | 494 | 554 | 344 | 493 | 428 | 586 | 593 | 1370 | 898.77 | 267 | 237 | 264 | 236 | 210 | 196 | 224 | 228 | 303 |
| 562.1  | 1230 | 499 | 553 | 340 | 502 | 419 | 594 | 594 | 1381 | 899.08 | 267 | 240 | 273 | 242 | 205 | 193 | 227 | 232 | 303 |
| 562.45 | 1216 | 486 | 540 | 334 | 514 | 420 | 589 | 593 | 1361 | 899.38 | 257 | 237 | 269 | 244 | 208 | 189 | 218 | 222 | 299 |
| 562.8  | 1220 | 477 | 556 | 330 | 489 | 406 | 581 | 594 | 1376 | 899.69 | 277 | 240 | 266 | 241 | 214 | 193 | 218 | 232 | 309 |
| 563.15 | 1209 | 497 | 554 | 326 | 497 | 417 | 590 | 595 | 1375 | 899.99 | 271 | 246 | 264 | 243 | 208 | 192 | 223 | 224 | 301 |
| 563.5  | 1212 | 489 | 541 | 330 | 503 | 413 | 573 | 596 | 1381 | 900.3  | 258 | 245 | 261 | 240 | 204 | 197 | 214 | 224 | 293 |
| 563.85 | 1237 | 492 | 560 | 337 | 501 | 429 | 594 | 602 | 1401 | 900.6  | 274 | 242 | 266 | 244 | 206 | 194 | 219 | 230 | 298 |
| 564.21 | 1213 | 472 | 548 | 329 | 493 | 426 | 566 | 598 | 1370 | 900.91 | 262 | 239 | 257 | 237 | 210 | 198 | 215 | 220 | 297 |
| 564.56 | 1246 | 489 | 551 | 333 | 497 | 410 | 586 | 603 | 1399 | 901.21 | 274 | 243 | 271 | 244 | 211 | 200 | 226 | 234 | 303 |
| 564.91 | 1243 | 485 | 545 | 326 | 495 | 414 | 578 | 587 | 1372 | 901.52 | 271 | 242 | 255 | 241 | 206 | 196 | 213 | 220 | 301 |
| 565.26 | 1242 | 474 | 540 | 321 | 500 | 400 | 571 | 583 | 1391 | 901.82 | 257 | 238 | 265 | 240 | 207 | 193 | 210 | 210 | 294 |
| 565.61 | 1248 | 476 | 541 | 327 | 490 | 395 | 584 | 588 | 1415 | 902.12 | 259 | 236 | 256 | 237 | 206 | 190 | 217 | 222 | 302 |
| 565.96 | 1255 | 475 | 529 | 325 | 504 | 409 | 576 | 588 | 1400 | 902.43 | 257 | 244 | 263 | 237 | 207 | 196 | 222 | 217 | 299 |
| 566.31 | 1228 | 479 | 537 | 325 | 495 | 404 | 560 | 599 | 1409 | 902.73 | 253 | 240 | 265 | 233 | 200 | 198 | 218 | 227 | 294 |
| 566.66 | 1237 | 477 | 536 | 316 | 499 | 408 | 568 | 589 | 1422 | 903.04 | 267 | 232 | 266 | 239 | 199 | 190 | 211 | 223 | 307 |
| 567.02 | 1266 | 469 | 531 | 322 | 503 | 404 | 574 | 600 | 1402 | 903.34 | 252 | 245 | 257 | 234 | 204 | 190 | 214 | 219 | 299 |
| 567.37 | 1249 | 468 | 525 | 313 | 486 | 404 | 560 | 585 | 1403 | 903.64 | 261 | 243 | 259 | 241 | 205 | 203 | 223 | 226 | 294 |
| 567.72 | 1262 | 456 | 524 | 309 | 491 | 397 | 568 | 585 | 1422 | 903.95 | 262 | 233 | 259 | 235 | 207 | 191 | 218 | 219 | 298 |
| 568.07 | 1238 | 464 | 519 | 304 | 489 | 396 | 549 | 565 | 1399 | 904.25 | 257 | 231 | 259 | 233 | 204 | 198 | 213 | 226 | 290 |
| 568.42 | 1247 | 459 | 533 | 296 | 488 | 387 | 549 | 580 | 1416 | 904.56 | 249 | 238 | 260 | 241 | 196 | 188 | 215 | 214 | 292 |
| 568.77 | 1244 | 448 | 517 | 297 | 486 | 393 | 543 | 563 | 1385 | 904.86 | 257 | 233 | 260 | 238 | 201 | 187 | 219 | 223 | 290 |
| 569.12 | 1250 | 450 | 513 | 300 | 477 | 391 | 549 | 567 | 1425 | 905.16 | 298 | 264 | 278 | 265 | 251 | 231 | 250 | 259 | 324 |
| 569.47 | 1272 | 466 | 519 | 308 | 483 | 392 | 540 | 573 | 1410 | 905.47 | 256 | 239 | 250 | 234 | 201 | 184 | 215 | 220 | 297 |
| 569.82 | 1293 | 438 | 508 | 282 | 492 | 371 | 535 | 560 | 1428 | 905.77 | 256 | 232 | 263 | 233 | 206 | 187 | 220 | 210 | 300 |
| 570.17 | 1254 | 438 | 501 | 297 | 493 | 372 | 524 | 570 | 1416 | 906.07 | 254 | 229 | 257 | 235 | 197 | 187 | 215 | 212 | 286 |
| 570.52 | 1253 | 439 | 493 | 294 | 482 | 371 | 534 | 562 | 1419 | 906.38 | 250 | 233 | 258 | 234 | 194 | 187 | 214 | 213 | 285 |
| 570.87 | 1270 | 444 | 493 | 297 | 474 | 374 | 532 | 548 | 1402 | 906.68 | 253 | 237 | 246 | 233 | 198 | 185 | 214 | 213 | 286 |
| 571.22 | 1274 | 435 | 484 | 280 | 467 | 361 | 513 | 561 | 1408 | 906.98 | 248 | 234 | 259 | 234 | 195 | 179 | 204 | 213 | 292 |
| 571.57 | 1254 | 435 | 485 | 280 | 468 | 361 | 512 | 547 | 1404 | 907.29 | 260 | 229 | 255 | 235 | 189 | 185 | 210 | 211 | 290 |
| 571.93 | 1262 | 430 | 490 | 281 | 471 | 372 | 528 | 550 | 1417 | 907.59 | 247 | 230 | 255 | 230 | 194 | 186 | 215 | 213 | 285 |
| 572.28 | 1272 | 427 | 490 | 280 | 470 | 362 | 513 | 554 | 1425 | 907.89 | 249 | 226 | 257 | 240 | 201 | 178 | 209 | 210 | 286 |
| 572.63 | 1277 | 428 | 488 | 275 | 466 | 355 | 508 | 548 | 1408 | 908.2  | 241 | 231 | 254 | 232 | 194 | 183 | 209 | 217 | 284 |
| 572.98 | 1271 | 424 | 480 | 278 | 465 | 360 | 506 | 553 | 1416 | 908.5  | 251 | 227 | 253 | 233 | 195 | 184 | 214 | 212 | 285 |
| 573.33 | 1279 | 414 | 474 | 276 | 452 | 353 | 504 | 537 | 1379 | 908.8  | 241 | 231 | 252 | 231 | 192 | 183 | 209 | 215 |     |

|        |      |     |      |     |     |     |      |      |      |        |     |     |     |     |     |     |     |     |     |
|--------|------|-----|------|-----|-----|-----|------|------|------|--------|-----|-----|-----|-----|-----|-----|-----|-----|-----|
| 577.18 | 1292 | 415 | 475  | 264 | 452 | 337 | 488  | 522  | 1400 | 912.13 | 246 | 228 | 246 | 234 | 196 | 179 | 202 | 208 | 274 |
| 577.53 | 1295 | 419 | 476  | 272 | 450 | 339 | 484  | 531  | 1413 | 912.43 | 245 | 223 | 245 | 232 | 194 | 186 | 211 | 208 | 279 |
| 577.88 | 1282 | 420 | 473  | 268 | 454 | 347 | 496  | 520  | 1394 | 912.74 | 239 | 230 | 244 | 231 | 194 | 185 | 204 | 210 | 279 |
| 578.23 | 1273 | 415 | 481  | 270 | 450 | 354 | 498  | 536  | 1412 | 913.04 | 246 | 229 | 255 | 229 | 202 | 184 | 212 | 212 | 275 |
| 578.58 | 1272 | 422 | 477  | 279 | 456 | 349 | 488  | 529  | 1420 | 913.34 | 256 | 227 | 247 | 225 | 191 | 177 | 214 | 208 | 283 |
| 578.93 | 1306 | 435 | 484  | 283 | 478 | 366 | 516  | 546  | 1432 | 913.64 | 247 | 232 | 251 | 233 | 190 | 181 | 200 | 216 | 276 |
| 579.28 | 1286 | 432 | 487  | 284 | 471 | 350 | 512  | 530  | 1428 | 913.95 | 244 | 234 | 255 | 234 | 187 | 187 | 206 | 208 | 279 |
| 579.63 | 1278 | 433 | 498  | 286 | 474 | 361 | 512  | 540  | 1413 | 914.25 | 242 | 229 | 254 | 231 | 188 | 181 | 207 | 212 | 279 |
| 579.98 | 1286 | 432 | 498  | 284 | 472 | 355 | 524  | 550  | 1432 | 914.55 | 241 | 233 | 249 | 231 | 198 | 185 | 200 | 204 | 276 |
| 580.33 | 1288 | 433 | 502  | 286 | 482 | 359 | 524  | 559  | 1418 | 914.85 | 238 | 232 | 246 | 228 | 198 | 185 | 205 | 213 | 280 |
| 580.67 | 1293 | 441 | 510  | 292 | 473 | 370 | 532  | 566  | 1436 | 915.15 | 244 | 232 | 248 | 231 | 192 | 182 | 204 | 210 | 283 |
| 581.02 | 1283 | 445 | 506  | 294 | 500 | 377 | 543  | 565  | 1444 | 915.46 | 232 | 230 | 247 | 225 | 197 | 175 | 204 | 212 | 278 |
| 581.37 | 1295 | 465 | 516  | 292 | 486 | 385 | 544  | 575  | 1425 | 915.76 | 243 | 231 | 246 | 230 | 193 | 183 | 200 | 215 | 274 |
| 581.72 | 1297 | 461 | 523  | 306 | 497 | 382 | 550  | 568  | 1448 | 916.06 | 240 | 224 | 251 | 227 | 187 | 185 | 203 | 204 | 280 |
| 582.07 | 1284 | 469 | 535  | 319 | 507 | 397 | 565  | 578  | 1448 | 916.36 | 240 | 230 | 250 | 231 | 188 | 180 | 205 | 208 | 271 |
| 582.42 | 1305 | 491 | 541  | 320 | 508 | 411 | 564  | 584  | 1461 | 916.66 | 248 | 225 | 252 | 224 | 190 | 184 | 203 | 210 | 272 |
| 582.77 | 1299 | 489 | 548  | 324 | 513 | 408 | 566  | 599  | 1450 | 916.96 | 241 | 228 | 249 | 232 | 186 | 178 | 206 | 211 | 283 |
| 583.12 | 1303 | 496 | 561  | 328 | 520 | 415 | 586  | 603  | 1453 | 917.27 | 235 | 234 | 246 | 219 | 194 | 176 | 193 | 207 | 272 |
| 583.47 | 1318 | 496 | 563  | 345 | 518 | 431 | 584  | 620  | 1470 | 917.57 | 239 | 228 | 243 | 223 | 192 | 176 | 206 | 205 | 276 |
| 583.82 | 1280 | 502 | 578  | 354 | 538 | 426 | 607  | 620  | 1447 | 917.87 | 240 | 230 | 247 | 230 | 189 | 176 | 198 | 207 | 273 |
| 584.17 | 1307 | 527 | 585  | 354 | 539 | 439 | 613  | 633  | 1440 | 918.17 | 240 | 224 | 246 | 228 | 192 | 177 | 205 | 204 | 278 |
| 584.52 | 1297 | 515 | 594  | 363 | 546 | 437 | 623  | 633  | 1455 | 918.47 | 234 | 225 | 241 | 225 | 190 | 177 | 199 | 206 | 275 |
| 584.87 | 1325 | 532 | 599  | 375 | 553 | 455 | 638  | 649  | 1474 | 918.77 | 235 | 223 | 242 | 229 | 189 | 177 | 200 | 210 | 281 |
| 585.21 | 1282 | 547 | 619  | 385 | 560 | 463 | 669  | 659  | 1487 | 919.07 | 241 | 230 | 239 | 224 | 188 | 176 | 204 | 207 | 271 |
| 585.56 | 1311 | 561 | 625  | 398 | 577 | 461 | 667  | 670  | 1477 | 919.37 | 230 | 226 | 245 | 221 | 186 | 173 | 203 | 214 | 268 |
| 585.91 | 1314 | 574 | 634  | 403 | 566 | 475 | 668  | 675  | 1471 | 919.68 | 244 | 222 | 246 | 223 | 192 | 174 | 191 | 212 | 276 |
| 586.26 | 1342 | 574 | 651  | 406 | 586 | 495 | 695  | 700  | 1487 | 919.98 | 234 | 225 | 244 | 226 | 188 | 179 | 190 | 207 | 278 |
| 586.61 | 1321 | 584 | 660  | 428 | 602 | 499 | 716  | 698  | 1507 | 920.28 | 245 | 223 | 243 | 224 | 191 | 179 | 196 | 209 | 268 |
| 586.96 | 1297 | 584 | 676  | 438 | 610 | 499 | 710  | 715  | 1495 | 920.58 | 230 | 223 | 247 | 221 | 181 | 175 | 198 | 206 | 269 |
| 587.31 | 1311 | 596 | 687  | 438 | 602 | 515 | 732  | 712  | 1485 | 920.88 | 231 | 223 | 243 | 225 | 186 | 176 | 196 | 209 | 266 |
| 587.66 | 1327 | 595 | 692  | 453 | 610 | 533 | 737  | 730  | 1515 | 921.18 | 233 | 224 | 251 | 220 | 187 | 175 | 195 | 205 | 275 |
| 588.01 | 1318 | 603 | 710  | 465 | 622 | 533 | 757  | 727  | 1505 | 921.48 | 242 | 221 | 241 | 224 | 185 | 185 | 204 | 201 | 271 |
| 588.35 | 1301 | 634 | 729  | 485 | 639 | 543 | 789  | 755  | 1486 | 921.78 | 241 | 225 | 242 | 222 | 190 | 179 | 195 | 206 | 273 |
| 588.7  | 1302 | 633 | 723  | 491 | 636 | 549 | 774  | 740  | 1512 | 922.08 | 232 | 229 | 246 | 223 | 186 | 174 | 195 | 206 | 266 |
| 589.05 | 1319 | 640 | 744  | 496 | 624 | 566 | 788  | 773  | 1519 | 922.38 | 236 | 228 | 252 | 227 | 193 | 179 | 209 | 212 | 271 |
| 589.4  | 1321 | 662 | 764  | 514 | 650 | 576 | 801  | 763  | 1516 | 922.68 | 225 | 223 | 236 | 221 | 188 | 176 | 189 | 210 | 275 |
| 589.75 | 1322 | 651 | 759  | 515 | 641 | 575 | 816  | 769  | 1484 | 922.98 | 241 | 222 | 233 | 218 | 186 | 174 | 193 | 197 | 268 |
| 590.1  | 1330 | 670 | 770  | 542 | 657 | 595 | 826  | 799  | 1520 | 923.28 | 233 | 216 | 239 | 215 | 180 | 180 | 191 | 195 | 272 |
| 590.45 | 1311 | 672 | 788  | 535 | 662 | 597 | 834  | 804  | 1527 | 923.58 | 237 | 222 | 237 | 225 | 187 | 173 | 199 | 206 | 263 |
| 590.79 | 1333 | 689 | 807  | 560 | 691 | 599 | 854  | 819  | 1524 | 923.88 | 222 | 219 | 239 | 222 | 183 | 166 | 193 | 200 | 261 |
| 591.14 | 1328 | 689 | 797  | 557 | 694 | 608 | 867  | 809  | 1514 | 924.19 | 225 | 220 | 237 | 215 | 183 | 172 | 198 | 195 | 267 |
| 591.49 | 1324 | 697 | 826  | 567 | 692 | 624 | 877  | 822  | 1539 | 924.49 | 234 | 221 | 233 | 217 | 178 | 176 | 187 | 197 | 260 |
| 591.84 | 1326 | 722 | 828  | 589 | 698 | 611 | 887  | 831  | 1515 | 924.79 | 228 | 218 | 238 | 224 | 180 | 176 | 195 | 197 | 260 |
| 592.19 | 1367 | 716 | 857  | 591 | 708 | 626 | 897  | 824  | 1552 | 925.09 | 224 | 218 | 230 | 224 | 188 | 174 | 194 | 195 | 271 |
| 592.53 | 1348 | 732 | 861  | 604 | 717 | 635 | 903  | 859  | 1549 | 925.39 | 220 | 226 | 240 | 218 | 182 | 171 | 195 | 202 | 260 |
| 592.88 | 1331 | 734 | 866  | 616 | 716 | 649 | 926  | 842  | 1537 | 925.69 | 232 | 218 | 239 | 219 | 183 | 171 | 194 | 201 | 268 |
| 593.23 | 1328 | 734 | 859  | 613 | 701 | 644 | 901  | 841  | 1489 | 925.99 | 222 | 221 | 236 | 223 | 187 | 172 | 190 | 201 | 260 |
| 593.58 | 1356 | 751 | 888  | 631 | 726 | 660 | 936  | 862  | 1557 | 926.29 | 231 | 216 | 234 | 221 | 177 | 171 | 187 | 204 | 262 |
| 593.93 | 1347 | 752 | 898  | 630 | 721 | 664 | 937  | 855  | 1552 | 926.59 | 225 | 224 | 234 | 214 | 174 | 171 | 192 | 193 | 261 |
| 594.28 | 1353 | 764 | 906  | 649 | 728 | 682 | 958  | 874  | 1544 | 926.89 | 224 | 216 | 239 | 222 | 179 | 172 | 182 | 195 | 263 |
| 594.62 | 1352 | 776 | 910  | 665 | 742 | 666 | 944  | 863  | 1569 | 927.18 | 220 | 220 | 241 | 218 | 176 | 164 | 188 | 192 | 257 |
| 594.97 | 1333 | 753 | 913  | 660 | 742 | 666 | 956  | 868  | 1505 | 927.48 | 213 | 216 | 230 | 210 | 178 | 164 | 192 | 194 | 255 |
| 595.32 | 1345 | 760 | 930  | 667 | 730 | 674 | 970  | 881  | 1545 | 927.78 | 225 | 220 | 237 | 213 | 179 | 168 | 191 | 192 | 260 |
| 595.67 | 1369 | 783 | 933  | 680 | 734 | 689 | 983  | 908  | 1535 | 928.08 | 217 | 218 | 231 | 214 | 177 | 167 | 188 | 197 | 256 |
| 596.01 | 1355 | 789 | 953  | 692 | 762 | 700 | 995  | 914  | 1575 | 928.38 | 213 | 218 | 230 | 215 | 174 | 166 | 190 | 193 | 259 |
| 596.36 | 1366 | 777 | 957  | 695 | 747 | 684 | 970  | 904  | 1590 | 928.68 | 221 | 222 | 221 | 218 | 175 | 167 | 186 | 194 | 252 |
| 596.71 | 1375 | 787 | 959  | 711 | 766 | 696 | 1011 | 914  | 1575 | 928.98 | 218 | 224 | 242 | 222 | 173 | 171 | 185 | 195 | 259 |
| 597.06 | 1365 | 804 | 958  | 701 | 760 | 687 | 989  | 906  | 1573 | 929.28 | 213 | 214 | 236 | 220 | 174 | 167 | 186 | 192 | 249 |
| 597.41 | 1345 | 798 | 945  | 706 | 775 | 706 | 998  | 920  | 1570 | 929.58 | 212 | 212 | 238 | 220 | 178 | 170 | 182 | 197 | 254 |
| 597.75 | 1410 | 811 | 965  | 712 | 784 | 740 | 1034 | 940  | 1558 | 929.88 | 217 | 215 | 236 | 217 | 172 | 165 | 183 | 189 | 256 |
| 598.1  | 1351 | 792 | 959  | 713 | 778 | 705 | 1017 | 918  | 1558 | 930.18 | 217 | 218 | 239 | 210 | 177 | 168 | 186 | 190 | 255 |
| 598.45 | 1366 | 818 | 959  | 723 | 785 | 720 | 1014 | 922  | 1572 | 930.48 | 214 | 211 | 235 | 213 | 176 | 167 | 183 | 189 | 248 |
| 598.8  | 1372 | 816 | 999  | 726 | 787 | 733 | 1037 | 944  | 1591 | 930.78 | 214 | 216 | 233 | 216 | 173 | 171 | 182 | 196 | 254 |
| 599.14 | 1384 | 823 | 963  | 738 | 781 | 722 | 1009 | 943  | 1572 | 931.08 | 214 | 214 | 231 | 212 | 175 | 166 | 180 | 194 | 240 |
| 599.49 | 1409 | 828 | 1002 | 754 | 838 | 768 | 1069 | 1001 | 1606 | 931.37 | 215 | 212 | 230 | 215 | 171 | 164 | 177 | 185 | 253 |
| 599.84 | 1375 | 819 | 996  | 748 | 793 | 734 | 1021 | 941  | 1579 | 931.67 | 221 | 214 | 229 | 220 | 171 | 168 | 180 | 192 | 246 |
| 600.18 | 1392 | 821 | 979  | 738 | 792 | 738 | 1040 | 952  | 1568 | 931.97 | 211 | 210 | 230 | 208 | 173 | 161 | 175 | 188 | 240 |
| 600.53 | 1383 | 829 | 1001 | 749 | 802 | 744 | 1045 | 946  | 1583 | 932.27 | 214 | 214 | 229 | 206 | 175 | 163 | 183 | 186 | 249 |
| 600.88 | 1385 | 826 | 1025 | 764 | 813 | 747 | 1059 | 968  | 1569 | 932.57 | 208 | 206 | 226 | 210 | 175 | 164 | 183 | 189 | 249 |
| 601.23 | 1372 | 837 | 1020 | 763 | 808 | 747 | 1052 | 946  | 1571 | 932.87 | 208 | 209 | 224 | 209 | 177 | 167 | 187 | 190 | 245 |
| 601.57 | 1393 | 834 | 1006 | 778 | 825 | 758 | 1065 | 983  | 1603 | 933.17 | 226 | 213 | 224 | 209 | 174 | 164 | 186 | 187 | 244 |
| 601.92 | 1392 | 846 | 1002 | 776 | 824 | 754 | 1074 | 985  | 1605 | 933.47 | 202 | 206 | 226 | 213 |     |     |     |     |     |

|        |      |     |      |     |     |     |      |      |      |        |     |     |     |     |     |     |     |     |     |
|--------|------|-----|------|-----|-----|-----|------|------|------|--------|-----|-----|-----|-----|-----|-----|-----|-----|-----|
| 605.74 | 1404 | 856 | 1045 | 799 | 855 | 764 | 1074 | 1007 | 1610 | 936.75 | 202 | 202 | 216 | 204 | 162 | 160 | 173 | 175 | 239 |
| 606.08 | 1402 | 876 | 1066 | 816 | 840 | 776 | 1108 | 1023 | 1612 | 937.04 | 189 | 204 | 219 | 208 | 166 | 158 | 169 | 177 | 228 |
| 606.43 | 1402 | 872 | 1060 | 812 | 862 | 792 | 1096 | 998  | 1608 | 937.34 | 202 | 202 | 216 | 206 | 169 | 163 | 167 | 177 | 234 |
| 606.78 | 1414 | 874 | 1088 | 815 | 865 | 803 | 1103 | 1029 | 1632 | 937.64 | 200 | 203 | 213 | 205 | 163 | 158 | 170 | 177 | 224 |
| 607.12 | 1418 | 873 | 1068 | 823 | 860 | 788 | 1126 | 1016 | 1610 | 937.94 | 195 | 209 | 218 | 203 | 164 | 158 | 164 | 172 | 228 |
| 607.47 | 1412 | 858 | 1064 | 831 | 865 | 795 | 1081 | 1023 | 1599 | 938.24 | 192 | 204 | 213 | 206 | 158 | 158 | 170 | 178 | 225 |
| 607.82 | 1396 | 880 | 1076 | 832 | 844 | 795 | 1111 | 1018 | 1620 | 938.53 | 194 | 209 | 219 | 207 | 156 | 155 | 166 | 174 | 226 |
| 608.16 | 1430 | 892 | 1088 | 824 | 858 | 800 | 1100 | 1006 | 1590 | 938.83 | 195 | 197 | 218 | 204 | 158 | 153 | 167 | 171 | 225 |
| 608.51 | 1404 | 895 | 1094 | 823 | 880 | 799 | 1092 | 1013 | 1599 | 939.13 | 188 | 204 | 216 | 199 | 160 | 152 | 167 | 174 | 232 |
| 608.85 | 1399 | 902 | 1076 | 835 | 871 | 809 | 1102 | 1037 | 1628 | 939.43 | 204 | 208 | 222 | 206 | 165 | 165 | 176 | 179 | 233 |
| 609.2  | 1427 | 881 | 1075 | 823 | 856 | 806 | 1109 | 1038 | 1623 | 939.72 | 193 | 198 | 214 | 199 | 157 | 154 | 170 | 174 | 218 |
| 609.55 | 1442 | 882 | 1096 | 840 | 862 | 821 | 1110 | 1043 | 1615 | 940.02 | 189 | 202 | 212 | 200 | 159 | 153 | 164 | 166 | 220 |
| 609.89 | 1441 | 875 | 1101 | 834 | 879 | 810 | 1099 | 1038 | 1626 | 940.32 | 184 | 198 | 210 | 197 | 156 | 150 | 163 | 172 | 222 |
| 610.24 | 1438 | 915 | 1097 | 853 | 885 | 839 | 1128 | 1038 | 1626 | 940.61 | 176 | 199 | 207 | 206 | 158 | 152 | 162 | 173 | 215 |
| 610.59 | 1450 | 886 | 1075 | 843 | 871 | 809 | 1122 | 1043 | 1610 | 940.91 | 180 | 195 | 205 | 192 | 158 | 147 | 163 | 170 | 215 |
| 610.93 | 1457 | 885 | 1083 | 849 | 868 | 815 | 1115 | 1042 | 1636 | 941.21 | 184 | 198 | 208 | 193 | 158 | 146 | 161 | 173 | 218 |
| 611.28 | 1445 | 913 | 1114 | 863 | 903 | 834 | 1144 | 1069 | 1660 | 941.51 | 183 | 203 | 212 | 200 | 159 | 148 | 161 | 173 | 221 |
| 611.62 | 1437 | 890 | 1104 | 847 | 876 | 821 | 1119 | 1052 | 1645 | 941.8  | 178 | 194 | 205 | 199 | 156 | 145 | 161 | 169 | 214 |
| 611.97 | 1435 | 892 | 1105 | 855 | 893 | 840 | 1134 | 1042 | 1630 | 942.1  | 183 | 194 | 205 | 197 | 152 | 146 | 158 | 172 | 217 |
| 612.31 | 1454 | 910 | 1110 | 861 | 902 | 831 | 1140 | 1053 | 1624 | 942.4  | 176 | 196 | 209 | 192 | 156 | 146 | 156 | 160 | 213 |
| 612.66 | 1425 | 900 | 1094 | 855 | 896 | 807 | 1140 | 1056 | 1626 | 942.69 | 178 | 194 | 208 | 202 | 155 | 149 | 158 | 165 | 211 |
| 613.01 | 1438 | 906 | 1119 | 856 | 888 | 808 | 1135 | 1045 | 1625 | 942.99 | 185 | 193 | 208 | 193 | 153 | 147 | 164 | 167 | 210 |
| 613.35 | 1422 | 902 | 1106 | 864 | 902 | 833 | 1147 | 1056 | 1635 | 943.29 | 178 | 197 | 209 | 194 | 157 | 148 | 158 | 164 | 214 |
| 613.7  | 1437 | 916 | 1120 | 867 | 898 | 841 | 1147 | 1083 | 1644 | 943.58 | 178 | 194 | 209 | 203 | 154 | 145 | 156 | 163 | 212 |
| 614.04 | 1430 | 916 | 1112 | 851 | 889 | 828 | 1144 | 1054 | 1649 | 943.88 | 182 | 198 | 206 | 192 | 152 | 146 | 156 | 162 | 214 |
| 614.39 | 1426 | 912 | 1119 | 853 | 888 | 833 | 1142 | 1047 | 1618 | 944.18 | 181 | 197 | 202 | 190 | 152 | 146 | 155 | 162 | 212 |
| 614.74 | 1450 | 914 | 1090 | 869 | 906 | 825 | 1139 | 1057 | 1617 | 944.47 | 170 | 193 | 203 | 193 | 154 | 148 | 157 | 161 | 212 |
| 615.08 | 1448 | 925 | 1117 | 865 | 916 | 824 | 1168 | 1072 | 1651 | 944.77 | 178 | 201 | 206 | 203 | 156 | 151 | 156 | 165 | 211 |
| 615.43 | 1454 | 914 | 1119 | 869 | 906 | 828 | 1146 | 1065 | 1618 | 945.07 | 178 | 197 | 208 | 199 | 152 | 150 | 156 | 160 | 211 |
| 615.77 | 1451 | 920 | 1124 | 866 | 904 | 831 | 1136 | 1080 | 1648 | 945.36 | 173 | 198 | 207 | 200 | 155 | 147 | 153 | 161 | 205 |
| 616.12 | 1450 | 922 | 1119 | 874 | 914 | 819 | 1149 | 1079 | 1647 | 945.66 | 178 | 195 | 201 | 195 | 150 | 142 | 157 | 162 | 213 |
| 616.46 | 1447 | 929 | 1136 | 880 | 910 | 837 | 1152 | 1086 | 1675 | 945.96 | 177 | 194 | 212 | 204 | 155 | 149 | 160 | 171 | 212 |
| 616.81 | 1462 | 919 | 1125 | 880 | 921 | 858 | 1142 | 1077 | 1638 | 946.25 | 180 | 193 | 203 | 192 | 154 | 149 | 152 | 161 | 215 |
| 617.15 | 1470 | 914 | 1138 | 870 | 906 | 842 | 1147 | 1062 | 1651 | 946.55 | 179 | 189 | 206 | 193 | 154 | 148 | 156 | 165 | 210 |
| 617.5  | 1472 | 921 | 1117 | 901 | 904 | 871 | 1162 | 1082 | 1645 | 946.84 | 175 | 192 | 201 | 198 | 155 | 147 | 159 | 162 | 213 |
| 617.84 | 1445 | 917 | 1126 | 878 | 904 | 842 | 1168 | 1087 | 1639 | 947.14 | 182 | 193 | 201 | 193 | 153 | 144 | 159 | 160 | 212 |
| 618.19 | 1457 | 916 | 1110 | 867 | 932 | 854 | 1152 | 1060 | 1641 | 947.44 | 177 | 192 | 202 | 192 | 152 | 142 | 158 | 163 | 208 |
| 618.53 | 1457 | 923 | 1140 | 889 | 897 | 839 | 1171 | 1074 | 1658 | 947.73 | 174 | 194 | 199 | 198 | 153 | 142 | 156 | 162 | 205 |
| 618.88 | 1452 | 921 | 1127 | 884 | 931 | 853 | 1155 | 1082 | 1646 | 948.03 | 181 | 189 | 207 | 194 | 149 | 145 | 156 | 165 | 201 |
| 619.22 | 1451 | 937 | 1152 | 889 | 914 | 871 | 1162 | 1104 | 1646 | 948.32 | 180 | 193 | 206 | 191 | 150 | 148 | 155 | 161 | 209 |
| 619.57 | 1451 | 931 | 1136 | 897 | 919 | 851 | 1148 | 1081 | 1652 | 948.62 | 180 | 197 | 203 | 198 | 156 | 150 | 157 | 168 | 203 |
| 619.91 | 1447 | 917 | 1137 | 889 | 928 | 865 | 1163 | 1086 | 1666 | 948.92 | 173 | 189 | 198 | 191 | 153 | 145 | 153 | 156 | 211 |
| 620.26 | 1472 | 931 | 1158 | 909 | 916 | 860 | 1162 | 1093 | 1670 | 949.21 | 172 | 184 | 201 | 194 | 153 | 145 | 155 | 164 | 209 |
| 620.6  | 1474 | 932 | 1168 | 901 | 919 | 849 | 1150 | 1109 | 1663 | 949.51 | 175 | 188 | 204 | 194 | 152 | 144 | 157 | 161 | 204 |
| 620.95 | 1461 | 938 | 1157 | 884 | 921 | 848 | 1178 | 1095 | 1663 | 949.8  | 172 | 190 | 207 | 193 | 153 | 143 | 158 | 166 | 205 |
| 621.29 | 1487 | 931 | 1164 | 902 | 917 | 851 | 1188 | 1113 | 1706 | 950.1  | 176 | 190 | 203 | 190 | 157 | 146 | 155 | 165 | 210 |
| 621.64 | 1470 | 938 | 1142 | 887 | 936 | 858 | 1172 | 1098 | 1653 | 950.39 | 172 | 191 | 203 | 194 | 150 | 148 | 154 | 159 | 202 |
| 621.98 | 1486 | 933 | 1143 | 890 | 938 | 875 | 1179 | 1107 | 1655 | 950.69 | 174 | 187 | 196 | 198 | 149 | 145 | 154 | 155 | 208 |
| 622.33 | 1479 | 927 | 1161 | 909 | 932 | 859 | 1168 | 1113 | 1675 | 950.98 | 174 | 189 | 198 | 188 | 149 | 141 | 155 | 162 | 206 |
| 622.67 | 1491 | 934 | 1145 | 903 | 917 | 874 | 1189 | 1110 | 1650 | 951.28 | 178 | 194 | 199 | 192 | 149 | 140 | 154 | 162 | 208 |
| 623.02 | 1475 | 938 | 1170 | 914 | 922 | 866 | 1177 | 1104 | 1642 | 951.57 | 173 | 199 | 206 | 188 | 146 | 141 | 150 | 161 | 206 |
| 623.36 | 1452 | 955 | 1147 | 903 | 952 | 867 | 1182 | 1081 | 1651 | 951.87 | 174 | 189 | 199 | 190 | 145 | 145 | 153 | 160 | 201 |
| 623.71 | 1466 | 920 | 1149 | 907 | 930 | 853 | 1174 | 1099 | 1658 | 952.16 | 173 | 190 | 207 | 196 | 150 | 147 | 153 | 162 | 206 |
| 624.05 | 1484 | 916 | 1157 | 886 | 942 | 858 | 1160 | 1086 | 1655 | 952.46 | 168 | 193 | 201 | 187 | 149 | 141 | 154 | 162 | 204 |
| 624.4  | 1493 | 927 | 1152 | 907 | 929 | 857 | 1165 | 1100 | 1630 | 952.75 | 178 | 195 | 199 | 196 | 148 | 141 | 154 | 159 | 206 |
| 624.74 | 1480 | 939 | 1160 | 914 | 933 | 870 | 1172 | 1092 | 1661 | 953.05 | 170 | 192 | 205 | 193 | 152 | 144 | 157 | 163 | 206 |
| 625.08 | 1472 | 939 | 1150 | 898 | 944 | 858 | 1153 | 1100 | 1640 | 953.34 | 179 | 195 | 212 | 193 | 158 | 148 | 159 | 165 | 210 |
| 625.43 | 1480 | 953 | 1158 | 905 | 940 | 852 | 1175 | 1094 | 1665 | 953.64 | 177 | 190 | 203 | 191 | 151 | 144 | 154 | 156 | 201 |
| 625.77 | 1473 | 934 | 1145 | 914 | 935 | 872 | 1170 | 1087 | 1638 | 953.93 | 170 | 190 | 199 | 192 | 152 | 141 | 156 | 151 | 208 |
| 626.12 | 1486 | 931 | 1143 | 909 | 948 | 869 | 1161 | 1097 | 1655 | 954.23 | 169 | 190 | 192 | 184 | 152 | 147 | 157 | 157 | 205 |
| 626.46 | 1473 | 961 | 1161 | 903 | 944 | 878 | 1161 | 1105 | 1656 | 954.52 | 173 | 187 | 193 | 184 | 146 | 146 | 155 | 159 | 208 |
| 626.81 | 1450 | 927 | 1146 | 904 | 921 | 850 | 1159 | 1100 | 1640 | 954.82 | 177 | 194 | 199 | 191 | 149 | 143 | 153 | 158 | 210 |
| 627.15 | 1473 | 937 | 1166 | 914 | 915 | 882 | 1181 | 1092 | 1647 | 955.11 | 175 | 195 | 198 | 190 | 154 | 145 | 152 | 158 | 202 |
| 627.49 | 1479 | 934 | 1165 | 903 | 918 | 866 | 1165 | 1078 | 1636 | 955.41 | 173 | 198 | 202 | 192 | 150 | 143 | 153 | 162 | 197 |
| 627.84 | 1497 | 947 | 1159 | 908 | 935 | 855 | 1171 | 1120 | 1650 | 955.7  | 172 | 189 | 200 | 192 | 146 | 143 | 153 | 159 | 209 |
| 628.18 | 1471 | 916 | 1136 | 902 | 933 | 849 | 1158 | 1093 | 1649 | 955.99 | 169 | 198 | 196 | 190 | 148 | 141 | 156 | 152 | 201 |
| 628.53 | 1470 | 946 | 1151 | 902 | 938 | 852 | 1166 | 1101 | 1649 | 956.29 | 170 | 193 | 202 | 188 | 152 | 144 | 157 | 157 | 204 |
| 628.87 | 1463 | 929 | 1145 | 902 | 930 | 858 | 1167 | 1085 | 1666 | 956.58 | 170 | 188 | 198 | 187 | 148 | 142 | 152 | 163 | 206 |
| 629.21 | 1477 | 925 | 1163 | 909 | 932 | 870 | 1172 | 1091 | 1657 | 956.88 | 169 | 189 | 202 | 188 | 150 | 147 | 154 | 160 | 206 |
| 629.56 | 1485 | 952 | 1142 | 927 | 936 | 870 | 1177 | 1113 | 1663 | 957.17 | 165 | 188 | 198 | 190 | 150 | 146 | 152 | 164 | 205 |
| 629.9  | 1466 | 927 | 1131 | 901 | 934 | 850 | 1178 | 1105 | 1645 | 957.47 | 175 | 188 | 20  |     |     |     |     |     |     |

|        |      |     |      |     |     |     |      |      |      |        |     |     |     |     |     |     |     |     |     |
|--------|------|-----|------|-----|-----|-----|------|------|------|--------|-----|-----|-----|-----|-----|-----|-----|-----|-----|
| 634.02 | 1451 | 933 | 1137 | 877 | 918 | 854 | 1146 | 1075 | 1632 | 960.99 | 164 | 191 | 196 | 195 | 145 | 141 | 145 | 161 | 200 |
| 634.37 | 1450 | 938 | 1150 | 907 | 914 | 840 | 1141 | 1080 | 1629 | 961.28 | 167 | 188 | 197 | 187 | 143 | 142 | 147 | 156 | 199 |
| 634.71 | 1443 | 922 | 1141 | 900 | 915 | 837 | 1147 | 1090 | 1603 | 961.58 | 172 | 183 | 195 | 189 | 146 | 142 | 149 | 159 | 197 |
| 635.05 | 1442 | 933 | 1151 | 897 | 924 | 842 | 1162 | 1085 | 1622 | 961.87 | 170 | 188 | 200 | 187 | 145 | 136 | 147 | 156 | 202 |
| 635.4  | 1443 | 919 | 1125 | 888 | 910 | 859 | 1151 | 1066 | 1604 | 962.16 | 169 | 183 | 198 | 186 | 147 | 140 | 151 | 156 | 204 |
| 635.74 | 1465 | 928 | 1154 | 893 | 932 | 870 | 1172 | 1099 | 1644 | 962.46 | 166 | 184 | 195 | 188 | 144 | 139 | 147 | 153 | 198 |
| 636.08 | 1455 | 927 | 1143 | 901 | 909 | 847 | 1147 | 1072 | 1607 | 962.75 | 171 | 185 | 202 | 191 | 145 | 141 | 147 | 160 | 193 |
| 636.43 | 1445 | 922 | 1140 | 904 | 922 | 856 | 1158 | 1089 | 1628 | 963.04 | 167 | 190 | 201 | 189 | 149 | 141 | 146 | 157 | 201 |
| 636.77 | 1440 | 921 | 1150 | 914 | 930 | 839 | 1150 | 1080 | 1615 | 963.33 | 164 | 184 | 195 | 187 | 142 | 139 | 146 | 153 | 198 |
| 637.11 | 1441 | 922 | 1152 | 909 | 904 | 859 | 1169 | 1085 | 1633 | 963.63 | 166 | 185 | 194 | 184 | 144 | 141 | 147 | 156 | 200 |
| 637.46 | 1432 | 920 | 1141 | 896 | 920 | 854 | 1163 | 1081 | 1621 | 963.92 | 167 | 192 | 193 | 189 | 143 | 137 | 145 | 154 | 199 |
| 637.8  | 1434 | 942 | 1156 | 902 | 947 | 873 | 1154 | 1108 | 1642 | 964.21 | 166 | 184 | 197 | 186 | 141 | 137 | 145 | 156 | 196 |
| 638.14 | 1454 | 942 | 1139 | 897 | 932 | 849 | 1165 | 1084 | 1626 | 964.51 | 164 | 184 | 195 | 188 | 146 | 135 | 147 | 153 | 196 |
| 638.48 | 1440 | 927 | 1130 | 889 | 918 | 851 | 1162 | 1088 | 1632 | 964.8  | 170 | 188 | 199 | 194 | 150 | 145 | 149 | 161 | 204 |
| 638.83 | 1439 | 919 | 1129 | 881 | 921 | 858 | 1151 | 1090 | 1633 | 965.09 | 164 | 183 | 191 | 189 | 147 | 140 | 151 | 152 | 190 |
| 639.17 | 1444 | 917 | 1130 | 904 | 917 | 848 | 1131 | 1094 | 1594 | 965.38 | 166 | 192 | 195 | 187 | 147 | 140 | 150 | 157 | 198 |
| 639.51 | 1439 | 925 | 1142 | 903 | 932 | 844 | 1141 | 1078 | 1613 | 965.68 | 164 | 186 | 198 | 190 | 146 | 135 | 149 | 153 | 195 |
| 639.85 | 1439 | 921 | 1120 | 897 | 915 | 846 | 1143 | 1080 | 1598 | 965.97 | 161 | 193 | 199 | 186 | 144 | 137 | 149 | 153 | 198 |
| 640.2  | 1421 | 930 | 1133 | 895 | 914 | 863 | 1135 | 1097 | 1601 | 966.26 | 159 | 186 | 192 | 185 | 142 | 139 | 147 | 157 | 190 |
| 640.54 | 1447 | 934 | 1131 | 898 | 905 | 850 | 1164 | 1066 | 1583 | 966.55 | 165 | 183 | 198 | 187 | 142 | 137 | 150 | 153 | 193 |
| 640.88 | 1437 | 935 | 1158 | 895 | 916 | 853 | 1148 | 1089 | 1616 | 966.85 | 162 | 187 | 195 | 188 | 144 | 137 | 148 | 151 | 186 |
| 641.22 | 1430 | 924 | 1123 | 878 | 919 | 846 | 1159 | 1072 | 1609 | 967.14 | 160 | 185 | 193 | 190 | 143 | 138 | 145 | 148 | 194 |
| 641.57 | 1445 | 921 | 1139 | 882 | 922 | 833 | 1147 | 1093 | 1605 | 967.43 | 162 | 181 | 188 | 187 | 141 | 139 | 149 | 143 | 197 |
| 641.91 | 1409 | 924 | 1106 | 890 | 914 | 854 | 1139 | 1081 | 1603 | 967.72 | 160 | 189 | 192 | 185 | 141 | 140 | 145 | 149 | 191 |
| 642.25 | 1430 | 919 | 1139 | 896 | 926 | 830 | 1141 | 1050 | 1590 | 968.01 | 159 | 182 | 192 | 185 | 141 | 137 | 142 | 154 | 193 |
| 642.59 | 1417 | 923 | 1120 | 879 | 911 | 830 | 1145 | 1071 | 1581 | 968.31 | 165 | 182 | 195 | 185 | 140 | 137 | 142 | 156 | 193 |
| 642.94 | 1431 | 913 | 1128 | 885 | 911 | 846 | 1153 | 1083 | 1589 | 968.6  | 162 | 188 | 193 | 183 | 145 | 137 | 145 | 147 | 190 |
| 643.28 | 1427 | 915 | 1121 | 873 | 909 | 853 | 1138 | 1074 | 1596 | 968.89 | 157 | 182 | 192 | 184 | 142 | 137 | 143 | 148 | 186 |
| 643.62 | 1412 | 921 | 1120 | 894 | 921 | 827 | 1129 | 1074 | 1591 | 969.18 | 158 | 185 | 191 | 182 | 140 | 140 | 143 | 151 | 194 |
| 643.96 | 1397 | 910 | 1104 | 875 | 926 | 860 | 1129 | 1077 | 1589 | 969.47 | 160 | 184 | 191 | 184 | 143 | 134 | 141 | 152 | 187 |
| 644.3  | 1427 | 934 | 1118 | 900 | 923 | 862 | 1153 | 1089 | 1598 | 969.76 | 163 | 183 | 190 | 181 | 146 | 136 | 143 | 153 | 190 |
| 644.65 | 1414 | 914 | 1113 | 892 | 919 | 850 | 1132 | 1075 | 1596 | 970.06 | 160 | 184 | 192 | 184 | 145 | 136 | 142 | 150 | 190 |
| 644.99 | 1412 | 923 | 1114 | 881 | 919 | 850 | 1120 | 1064 | 1563 | 970.35 | 160 | 189 | 193 | 180 | 140 | 136 | 145 | 151 | 184 |
| 645.33 | 1418 | 897 | 1117 | 873 | 914 | 837 | 1121 | 1068 | 1592 | 970.64 | 160 | 178 | 197 | 182 | 140 | 134 | 144 | 149 | 190 |
| 645.67 | 1422 | 923 | 1105 | 888 | 898 | 840 | 1137 | 1067 | 1543 | 970.93 | 160 | 183 | 189 | 183 | 140 | 136 | 140 | 147 | 191 |
| 646.01 | 1434 | 909 | 1118 | 884 | 891 | 844 | 1129 | 1055 | 1556 | 971.22 | 163 | 180 | 196 | 181 | 140 | 134 | 140 | 151 | 185 |
| 646.36 | 1431 | 907 | 1113 | 878 | 914 | 867 | 1143 | 1077 | 1587 | 971.51 | 160 | 188 | 187 | 176 | 136 | 133 | 141 | 150 | 199 |
| 646.7  | 1410 | 906 | 1106 | 885 | 919 | 844 | 1142 | 1065 | 1603 | 971.81 | 168 | 188 | 200 | 192 | 146 | 140 | 147 | 163 | 197 |
| 647.04 | 1404 | 913 | 1125 | 888 | 917 | 846 | 1129 | 1072 | 1568 | 972.1  | 160 | 188 | 192 | 181 | 145 | 140 | 148 | 149 | 189 |
| 647.38 | 1394 | 902 | 1106 | 879 | 885 | 840 | 1111 | 1070 | 1559 | 972.39 | 163 | 182 | 184 | 182 | 145 | 135 | 143 | 146 | 188 |
| 647.72 | 1417 | 895 | 1099 | 871 | 908 | 836 | 1116 | 1083 | 1570 | 972.68 | 159 | 179 | 187 | 181 | 142 | 130 | 142 | 148 | 188 |
| 648.07 | 1417 | 916 | 1112 | 890 | 903 | 843 | 1121 | 1081 | 1562 | 972.97 | 162 | 183 | 189 | 186 | 141 | 134 | 140 | 153 | 190 |
| 648.41 | 1403 | 907 | 1121 | 885 | 911 | 837 | 1131 | 1076 | 1587 | 973.26 | 154 | 180 | 186 | 184 | 140 | 134 | 138 | 149 | 192 |
| 648.75 | 1388 | 896 | 1096 | 888 | 904 | 838 | 1113 | 1056 | 1571 | 973.55 | 161 | 185 | 193 | 188 | 143 | 143 | 144 | 158 | 199 |
| 649.09 | 1393 | 881 | 1115 | 870 | 916 | 835 | 1130 | 1073 | 1547 | 973.84 | 155 | 179 | 188 | 181 | 143 | 136 | 141 | 150 | 187 |
| 649.43 | 1407 | 883 | 1107 | 893 | 893 | 834 | 1128 | 1056 | 1578 | 974.13 | 155 | 184 | 190 | 183 | 142 | 133 | 142 | 150 | 189 |
| 649.77 | 1415 | 888 | 1103 | 889 | 891 | 830 | 1108 | 1066 | 1555 | 974.42 | 160 | 183 | 186 | 182 | 140 | 134 | 142 | 150 | 186 |
| 650.11 | 1409 | 886 | 1078 | 869 | 897 | 850 | 1111 | 1057 | 1541 | 974.71 | 155 | 184 | 192 | 185 | 141 | 135 | 139 | 151 | 188 |
| 650.46 | 1402 | 907 | 1099 | 890 | 900 | 825 | 1124 | 1054 | 1536 | 975.01 | 154 | 182 | 189 | 182 | 136 | 133 | 136 | 147 | 181 |
| 650.8  | 1423 | 898 | 1104 | 876 | 889 | 845 | 1135 | 1054 | 1547 | 975.3  | 154 | 179 | 185 | 187 | 135 | 132 | 136 | 144 | 188 |
| 651.14 | 1400 | 897 | 1092 | 877 | 887 | 842 | 1141 | 1053 | 1563 | 975.59 | 156 | 186 | 183 | 183 | 133 | 130 | 139 | 146 | 181 |
| 651.48 | 1383 | 891 | 1105 | 876 | 895 | 840 | 1110 | 1062 | 1559 | 975.88 | 153 | 179 | 188 | 182 | 134 | 135 | 143 | 148 | 187 |
| 651.82 | 1386 | 891 | 1120 | 885 | 907 | 839 | 1117 | 1065 | 1549 | 976.17 | 151 | 175 | 188 | 188 | 137 | 137 | 141 | 148 | 189 |
| 652.16 | 1395 | 881 | 1104 | 868 | 909 | 829 | 1107 | 1059 | 1560 | 976.46 | 154 | 176 | 191 | 181 | 138 | 134 | 140 | 145 | 184 |
| 652.5  | 1393 | 913 | 1090 | 880 | 914 | 846 | 1104 | 1063 | 1567 | 976.75 | 152 | 181 | 184 | 181 | 137 | 134 | 141 | 148 | 189 |
| 652.84 | 1393 | 910 | 1093 | 865 | 889 | 836 | 1105 | 1058 | 1550 | 977.04 | 154 | 180 | 185 | 180 | 135 | 137 | 136 | 148 | 190 |
| 653.18 | 1403 | 894 | 1102 | 881 | 901 | 825 | 1106 | 1084 | 1546 | 977.33 | 155 | 175 | 185 | 180 | 132 | 134 | 135 | 150 | 187 |
| 653.53 | 1374 | 898 | 1110 | 876 | 900 | 840 | 1115 | 1046 | 1538 | 977.62 | 151 | 172 | 183 | 180 | 135 | 134 | 135 | 141 | 185 |
| 653.87 | 1395 | 885 | 1103 | 880 | 892 | 830 | 1126 | 1047 | 1539 | 977.91 | 154 | 176 | 188 | 179 | 136 | 137 | 133 | 143 | 186 |
| 654.21 | 1381 | 891 | 1085 | 875 | 898 | 839 | 1100 | 1042 | 1530 | 978.2  | 153 | 176 | 185 | 180 | 134 | 137 | 134 | 140 | 187 |
| 654.55 | 1372 | 889 | 1076 | 883 | 906 | 841 | 1106 | 1043 | 1546 | 978.49 | 151 | 180 | 181 | 176 | 134 | 134 | 136 | 145 | 184 |
| 654.89 | 1381 | 892 | 1108 | 857 | 889 | 839 | 1098 | 1044 | 1550 | 978.78 | 154 | 176 | 186 | 184 | 136 | 129 | 135 | 148 | 188 |
| 655.23 | 1368 | 894 | 1099 | 874 | 893 | 825 | 1094 | 1055 | 1513 | 979.07 | 150 | 177 | 190 | 176 | 134 | 129 | 137 | 144 | 183 |
| 655.57 | 1386 | 900 | 1101 | 884 | 889 | 839 | 1092 | 1058 | 1534 | 979.36 | 146 | 180 | 186 | 179 | 133 | 129 | 139 | 144 | 179 |
| 655.91 | 1363 | 879 | 1085 | 863 | 890 | 841 | 1106 | 1039 | 1521 | 979.65 | 153 | 179 | 185 | 180 | 135 | 134 | 143 | 147 | 187 |
| 656.25 | 1363 | 893 | 1092 | 869 | 895 | 830 | 1086 | 1055 | 1500 | 979.94 | 154 | 180 | 183 | 178 | 135 | 134 | 141 | 148 | 184 |
| 656.59 | 1401 | 882 | 1082 | 876 | 897 | 834 | 1113 | 1048 | 1525 | 980.23 | 148 | 173 | 180 | 178 | 133 | 127 | 140 | 145 | 182 |
| 656.93 | 1374 | 894 | 1089 | 871 | 896 | 844 | 1107 | 1047 | 1529 | 980.52 | 150 | 182 | 186 | 180 | 134 | 130 | 138 | 146 | 181 |
| 657.27 | 1387 | 902 | 1111 | 889 | 908 | 851 | 1121 | 1053 | 1536 | 980.81 | 150 | 178 | 186 | 179 | 136 | 132 | 135 | 141 | 179 |
| 657.61 | 1390 | 881 | 1095 | 864 | 902 | 834 | 1107 | 1036 | 1529 | 981.1  | 152 | 177 | 182 | 177 | 134 | 129 | 134 | 142 | 177 |
| 657.95 | 1388 | 893 | 1099 | 885 | 904 | 845 | 1091 | 1056 | 1514 | 981.39 | 151 | 178 | 18  |     |     |     |     |     |     |

|        |      |     |      |     |     |     |      |      |      |         |     |     |     |     |     |     |     |     |     |
|--------|------|-----|------|-----|-----|-----|------|------|------|---------|-----|-----|-----|-----|-----|-----|-----|-----|-----|
| 662.04 | 1371 | 903 | 1076 | 883 | 895 | 832 | 1092 | 1065 | 1526 | 984.85  | 145 | 174 | 179 | 176 | 136 | 124 | 136 | 142 | 178 |
| 662.38 | 1373 | 906 | 1078 | 879 | 908 | 845 | 1085 | 1051 | 1501 | 985.14  | 148 | 178 | 181 | 176 | 136 | 127 | 133 | 146 | 177 |
| 662.71 | 1392 | 880 | 1086 | 859 | 886 | 837 | 1107 | 1060 | 1534 | 985.43  | 149 | 177 | 188 | 176 | 136 | 128 | 134 | 141 | 177 |
| 663.05 | 1359 | 883 | 1083 | 857 | 880 | 816 | 1064 | 1046 | 1503 | 985.72  | 147 | 174 | 184 | 177 | 137 | 126 | 133 | 140 | 178 |
| 663.39 | 1370 | 897 | 1078 | 884 | 895 | 841 | 1102 | 1055 | 1525 | 986.01  | 145 | 181 | 178 | 178 | 135 | 127 | 133 | 143 | 178 |
| 663.73 | 1357 | 872 | 1079 | 859 | 897 | 818 | 1095 | 1026 | 1491 | 986.3   | 145 | 174 | 179 | 175 | 132 | 126 | 132 | 140 | 174 |
| 664.07 | 1359 | 884 | 1086 | 864 | 882 | 833 | 1080 | 1038 | 1498 | 986.58  | 148 | 174 | 181 | 175 | 134 | 127 | 133 | 140 | 180 |
| 664.41 | 1377 | 880 | 1082 | 875 | 881 | 832 | 1099 | 1047 | 1527 | 986.87  | 146 | 177 | 182 | 173 | 130 | 126 | 131 | 140 | 179 |
| 664.75 | 1381 | 879 | 1081 | 866 | 903 | 844 | 1090 | 1051 | 1504 | 987.16  | 146 | 178 | 183 | 182 | 129 | 129 | 133 | 142 | 176 |
| 665.09 | 1370 | 872 | 1085 | 862 | 897 | 831 | 1113 | 1040 | 1508 | 987.45  | 150 | 177 | 180 | 178 | 133 | 128 | 132 | 144 | 175 |
| 665.43 | 1372 | 892 | 1086 | 869 | 908 | 847 | 1090 | 1038 | 1486 | 987.74  | 149 | 177 | 185 | 175 | 133 | 126 | 132 | 147 | 180 |
| 665.77 | 1359 | 870 | 1078 | 867 | 881 | 822 | 1082 | 1028 | 1521 | 988.03  | 145 | 177 | 185 | 172 | 134 | 129 | 134 | 141 | 175 |
| 666.11 | 1350 | 881 | 1083 | 887 | 882 | 846 | 1093 | 1037 | 1512 | 988.31  | 146 | 174 | 186 | 172 | 136 | 127 | 134 | 137 | 173 |
| 666.45 | 1371 | 880 | 1078 | 877 | 879 | 816 | 1101 | 1034 | 1513 | 988.6   | 149 | 175 | 188 | 175 | 136 | 128 | 133 | 137 | 182 |
| 666.79 | 1340 | 875 | 1089 | 864 | 877 | 833 | 1083 | 1038 | 1505 | 988.89  | 146 | 174 | 181 | 175 | 131 | 129 | 133 | 140 | 175 |
| 667.13 | 1328 | 869 | 1076 | 849 | 891 | 838 | 1089 | 1035 | 1499 | 989.18  | 144 | 177 | 180 | 177 | 132 | 128 | 130 | 142 | 175 |
| 667.47 | 1354 | 871 | 1089 | 871 | 890 | 826 | 1074 | 1030 | 1506 | 989.47  | 145 | 173 | 183 | 179 | 131 | 127 | 128 | 140 | 177 |
| 667.81 | 1356 | 879 | 1075 | 869 | 891 | 826 | 1084 | 1036 | 1506 | 989.75  | 143 | 179 | 186 | 173 | 132 | 126 | 129 | 140 | 175 |
| 668.15 | 1362 | 873 | 1076 | 872 | 884 | 829 | 1102 | 1061 | 1500 | 990.04  | 139 | 175 | 184 | 179 | 133 | 127 | 130 | 138 | 175 |
| 668.49 | 1351 | 879 | 1073 | 859 | 883 | 818 | 1104 | 1038 | 1516 | 990.33  | 139 | 173 | 183 | 177 | 133 | 132 | 134 | 141 | 176 |
| 668.82 | 1362 | 888 | 1086 | 864 | 895 | 834 | 1095 | 1028 | 1520 | 990.62  | 146 | 171 | 180 | 176 | 129 | 126 | 130 | 144 | 174 |
| 669.16 | 1376 | 874 | 1079 | 865 | 897 | 819 | 1089 | 1037 | 1503 | 990.9   | 148 | 173 | 179 | 179 | 129 | 127 | 127 | 140 | 175 |
| 669.5  | 1340 | 871 | 1093 | 865 | 881 | 820 | 1068 | 1044 | 1492 | 991.19  | 146 | 175 | 180 | 175 | 132 | 128 | 126 | 140 | 176 |
| 669.84 | 1359 | 884 | 1069 | 862 | 902 | 828 | 1076 | 1041 | 1507 | 991.48  | 147 | 173 | 179 | 181 | 133 | 130 | 127 | 144 | 173 |
| 670.18 | 1360 | 879 | 1089 | 867 | 890 | 843 | 1081 | 1035 | 1497 | 991.77  | 145 | 175 | 174 | 178 | 134 | 126 | 127 | 144 | 172 |
| 670.52 | 1360 | 874 | 1055 | 869 | 888 | 834 | 1082 | 1037 | 1500 | 992.05  | 145 | 171 | 179 | 180 | 129 | 123 | 128 | 144 | 169 |
| 670.86 | 1359 | 867 | 1085 | 863 | 889 | 822 | 1076 | 1025 | 1490 | 992.34  | 146 | 178 | 180 | 178 | 127 | 125 | 128 | 141 | 173 |
| 671.2  | 1376 | 874 | 1065 | 863 | 884 | 825 | 1079 | 1044 | 1477 | 992.63  | 146 | 175 | 181 | 180 | 129 | 127 | 127 | 143 | 174 |
| 671.53 | 1347 | 870 | 1057 | 869 | 891 | 831 | 1067 | 1021 | 1482 | 992.91  | 142 | 173 | 179 | 176 | 128 | 128 | 126 | 139 | 172 |
| 671.87 | 1349 | 877 | 1062 | 867 | 905 | 819 | 1089 | 1037 | 1502 | 993.2   | 145 | 176 | 178 | 171 | 128 | 125 | 127 | 137 | 170 |
| 672.21 | 1355 | 873 | 1062 | 854 | 866 | 810 | 1087 | 1030 | 1493 | 993.49  | 144 | 174 | 178 | 172 | 130 | 126 | 127 | 140 | 177 |
| 672.55 | 1368 | 862 | 1072 | 860 | 881 | 816 | 1087 | 1025 | 1477 | 993.78  | 141 | 170 | 177 | 173 | 130 | 127 | 127 | 140 | 169 |
| 672.89 | 1350 | 871 | 1042 | 867 | 902 | 829 | 1078 | 1042 | 1461 | 994.06  | 140 | 176 | 181 | 176 | 132 | 129 | 129 | 136 | 171 |
| 673.23 | 1330 | 878 | 1066 | 870 | 894 | 819 | 1079 | 1032 | 1491 | 994.35  | 140 | 174 | 178 | 177 | 131 | 132 | 129 | 139 | 169 |
| 673.57 | 1331 | 881 | 1057 | 852 | 884 | 813 | 1059 | 1033 | 1445 | 994.64  | 140 | 174 | 179 | 177 | 128 | 126 | 127 | 139 | 175 |
| 673.9  | 1349 | 871 | 1052 | 868 | 885 | 817 | 1064 | 1038 | 1503 | 994.92  | 143 | 180 | 181 | 176 | 132 | 125 | 127 | 137 | 175 |
| 674.24 | 1374 | 852 | 1077 | 875 | 880 | 825 | 1072 | 1034 | 1470 | 995.21  | 142 | 174 | 176 | 173 | 132 | 126 | 129 | 135 | 170 |
| 674.58 | 1353 | 874 | 1071 | 851 | 890 | 817 | 1071 | 1023 | 1467 | 995.5   | 142 | 176 | 178 | 177 | 136 | 126 | 127 | 135 | 170 |
| 674.92 | 1348 | 866 | 1062 | 867 | 877 | 802 | 1070 | 1016 | 1461 | 995.78  | 140 | 172 | 176 | 176 | 133 | 126 | 126 | 138 | 168 |
| 675.26 | 1337 | 878 | 1045 | 856 | 889 | 803 | 1079 | 1034 | 1494 | 996.07  | 145 | 173 | 176 | 179 | 132 | 126 | 126 | 141 | 171 |
| 675.6  | 1336 | 867 | 1056 | 845 | 867 | 810 | 1066 | 1018 | 1448 | 996.35  | 145 | 171 | 180 | 173 | 128 | 125 | 126 | 142 | 169 |
| 675.93 | 1356 | 881 | 1058 | 868 | 867 | 823 | 1073 | 1044 | 1476 | 996.64  | 151 | 183 | 189 | 182 | 137 | 137 | 137 | 149 | 180 |
| 676.27 | 1343 | 856 | 1052 | 872 | 875 | 822 | 1065 | 1017 | 1471 | 996.93  | 142 | 178 | 181 | 173 | 133 | 136 | 134 | 142 | 169 |
| 676.61 | 1341 | 851 | 1061 | 850 | 891 | 813 | 1064 | 1020 | 1480 | 997.21  | 140 | 173 | 177 | 171 | 130 | 130 | 129 | 141 | 168 |
| 676.95 | 1341 | 862 | 1054 | 868 | 889 | 819 | 1073 | 1021 | 1462 | 997.5   | 138 | 175 | 182 | 171 | 130 | 130 | 127 | 138 | 170 |
| 677.29 | 1332 | 866 | 1052 | 876 | 873 | 812 | 1065 | 1012 | 1465 | 997.79  | 136 | 173 | 180 | 173 | 128 | 127 | 124 | 136 | 169 |
| 677.62 | 1328 | 853 | 1058 | 861 | 871 | 818 | 1076 | 1022 | 1476 | 998.07  | 139 | 173 | 180 | 172 | 127 | 124 | 124 | 141 | 168 |
| 677.96 | 1323 | 852 | 1051 | 866 | 871 | 813 | 1059 | 1035 | 1467 | 998.36  | 141 | 171 | 178 | 174 | 132 | 122 | 125 | 137 | 171 |
| 678.3  | 1330 | 862 | 1051 | 855 | 869 | 817 | 1059 | 1034 | 1487 | 998.64  | 143 | 169 | 173 | 169 | 132 | 124 | 126 | 136 | 173 |
| 678.64 | 1330 | 855 | 1052 | 846 | 878 | 799 | 1066 | 1012 | 1463 | 998.93  | 136 | 176 | 177 | 173 | 131 | 131 | 125 | 134 | 171 |
| 678.98 | 1341 | 858 | 1069 | 843 | 866 | 815 | 1080 | 1021 | 1473 | 999.22  | 136 | 177 | 174 | 172 | 128 | 129 | 127 | 134 | 165 |
| 679.31 | 1340 | 857 | 1066 | 853 | 876 | 820 | 1078 | 1028 | 1491 | 999.5   | 138 | 175 | 177 | 170 | 130 | 128 | 125 | 136 | 169 |
| 679.65 | 1331 | 854 | 1051 | 847 | 867 | 825 | 1069 | 1018 | 1466 | 999.79  | 141 | 173 | 176 | 171 | 131 | 125 | 126 | 138 | 168 |
| 679.99 | 1341 | 854 | 1073 | 845 | 887 | 819 | 1069 | 1037 | 1454 | 1000.07 | 137 | 177 | 177 | 171 | 127 | 125 | 127 | 136 | 168 |
| 680.33 | 1333 | 852 | 1054 | 847 | 860 | 799 | 1056 | 1010 | 1450 | 1000.36 | 138 | 175 | 180 | 169 | 128 | 127 | 125 | 137 | 174 |
| 680.66 | 1335 | 866 | 1043 | 869 | 884 | 815 | 1063 | 1046 | 1462 | 1000.64 | 136 | 171 | 183 | 173 | 129 | 124 | 127 | 140 | 164 |
| 681    | 1328 | 858 | 1054 | 843 | 865 | 820 | 1042 | 992  | 1431 | 1000.93 | 134 | 170 | 175 | 168 | 126 | 124 | 128 | 137 | 162 |
| 681.34 | 1317 | 870 | 1071 | 844 | 884 | 818 | 1070 | 1036 | 1445 | 1001.21 | 135 | 169 | 181 | 171 | 127 | 124 | 128 | 133 | 162 |
| 681.68 | 1308 | 837 | 1022 | 853 | 879 | 793 | 1046 | 1014 | 1438 | 1001.5  | 137 | 168 | 175 | 171 | 132 | 126 | 128 | 129 | 166 |
| 682.01 | 1303 | 847 | 1034 | 842 | 864 | 809 | 1056 | 1000 | 1435 | 1001.79 | 138 | 172 | 172 | 177 | 132 | 126 | 126 | 133 | 171 |
| 682.35 | 1332 | 865 | 1042 | 854 | 868 | 802 | 1071 | 1028 | 1465 | 1002.07 | 139 | 167 | 175 | 169 | 129 | 122 | 129 | 133 | 165 |
| 682.69 | 1320 | 847 | 1048 | 840 | 872 | 803 | 1062 | 1029 | 1446 | 1002.36 | 137 | 173 | 173 | 171 | 128 | 124 | 126 | 135 | 165 |
| 683.02 | 1307 | 839 | 1037 | 839 | 882 | 810 | 1045 | 1005 | 1456 | 1002.64 | 137 | 173 | 176 | 170 | 128 | 127 | 123 | 135 | 164 |
| 683.36 | 1320 | 860 | 1022 | 853 | 870 | 803 | 1043 | 1009 | 1455 | 1002.93 | 139 | 179 | 176 | 175 | 128 | 128 | 124 | 135 | 163 |
| 683.7  | 1327 | 853 | 1041 | 837 | 878 | 813 | 1049 | 1000 | 1449 | 1003.21 | 141 | 174 | 172 | 170 | 125 | 127 | 124 | 132 | 169 |
| 684.04 | 1297 | 858 | 1030 | 820 | 861 | 794 | 1029 | 988  | 1410 | 1003.5  | 143 | 176 | 176 | 175 | 129 | 126 | 128 | 133 | 168 |
| 684.37 | 1305 | 857 | 1044 | 849 | 863 | 814 | 1047 | 1022 | 1428 | 1003.78 | 139 | 169 | 171 | 176 | 128 | 127 | 128 | 137 | 169 |
| 684.71 | 1290 | 844 | 1023 | 831 | 851 | 791 | 1037 | 1006 | 1419 | 1004.07 | 133 | 170 | 176 | 172 | 124 | 126 | 126 | 137 | 163 |
| 685.05 | 1302 | 857 | 1025 | 847 | 860 | 810 | 1057 | 1020 | 1430 | 1004.35 | 134 | 170 | 176 | 170 | 126 | 124 | 126 | 135 | 164 |
| 685.38 | 1272 | 835 | 1022 | 852 | 860 | 798 | 1036 | 981  | 1386 | 1004.64 | 132 | 168 | 170 | 171 | 128 | 125 | 124 | 132 | 167 |
| 685.72 | 1314 | 841 | 1033 | 828 | 860 | 786 | 1052 | 995  | 1423 | 1004.92 | 135 | 1   |     |     |     |     |     |     |     |

|        |      |     |      |     |     |     |      |     |      |         |     |     |     |     |     |     |     |     |     |
|--------|------|-----|------|-----|-----|-----|------|-----|------|---------|-----|-----|-----|-----|-----|-----|-----|-----|-----|
| 689.76 | 1277 | 831 | 996  | 826 | 842 | 767 | 1010 | 985 | 1359 | 1008.33 | 135 | 170 | 173 | 176 | 123 | 122 | 124 | 133 | 164 |
| 690.1  | 1275 | 842 | 994  | 843 | 849 | 783 | 1032 | 995 | 1393 | 1008.61 | 134 | 173 | 177 | 171 | 124 | 122 | 125 | 132 | 162 |
| 690.43 | 1288 | 837 | 1014 | 814 | 826 | 773 | 1012 | 979 | 1376 | 1008.9  | 132 | 169 | 178 | 165 | 127 | 120 | 123 | 135 | 161 |
| 690.77 | 1266 | 819 | 972  | 804 | 848 | 781 | 1013 | 973 | 1378 | 1009.18 | 131 | 169 | 173 | 168 | 126 | 119 | 123 | 134 | 159 |
| 691.11 | 1278 | 823 | 996  | 812 | 834 | 760 | 1002 | 987 | 1388 | 1009.47 | 133 | 168 | 171 | 172 | 125 | 123 | 125 | 134 | 168 |
| 691.44 | 1267 | 825 | 978  | 815 | 824 | 765 | 1000 | 969 | 1385 | 1009.75 | 134 | 172 | 170 | 169 | 124 | 125 | 126 | 136 | 162 |
| 691.78 | 1257 | 808 | 993  | 798 | 823 | 763 | 999  | 985 | 1369 | 1010.03 | 136 | 169 | 172 | 168 | 125 | 123 | 125 | 133 | 161 |
| 692.11 | 1248 | 826 | 1010 | 802 | 833 | 775 | 1019 | 989 | 1379 | 1010.32 | 133 | 169 | 171 | 169 | 122 | 123 | 123 | 134 | 165 |
| 692.45 | 1232 | 827 | 993  | 812 | 833 | 765 | 992  | 984 | 1360 | 1010.6  | 129 | 173 | 174 | 173 | 120 | 124 | 123 | 135 | 161 |
| 692.79 | 1237 | 818 | 1014 | 813 | 814 | 764 | 1005 | 960 | 1360 | 1010.88 | 135 | 167 | 175 | 167 | 123 | 121 | 124 | 132 | 167 |
| 693.12 | 1245 | 813 | 981  | 810 | 822 | 770 | 993  | 967 | 1349 | 1011.17 | 133 | 172 | 175 | 169 | 125 | 120 | 122 | 134 | 167 |
| 693.46 | 1229 | 791 | 983  | 812 | 822 | 771 | 981  | 953 | 1354 | 1011.45 | 135 | 169 | 172 | 174 | 124 | 121 | 122 | 134 | 166 |
| 693.79 | 1240 | 803 | 1002 | 814 | 825 | 745 | 973  | 969 | 1340 | 1011.73 | 136 | 172 | 174 | 173 | 125 | 121 | 123 | 136 | 160 |
| 694.13 | 1253 | 805 | 974  | 786 | 815 | 760 | 991  | 954 | 1345 | 1012.02 | 133 | 173 | 176 | 166 | 126 | 121 | 125 | 134 | 158 |
| 694.46 | 1229 | 800 | 986  | 803 | 808 | 762 | 980  | 969 | 1349 | 1012.3  | 132 | 166 | 174 | 168 | 126 | 120 | 121 | 129 | 163 |
| 694.8  | 1233 | 799 | 970  | 815 | 823 | 768 | 999  | 940 | 1325 | 1012.58 | 136 | 169 | 175 | 171 | 128 | 122 | 118 | 130 | 163 |
| 695.14 | 1232 | 806 | 982  | 800 | 813 | 759 | 969  | 934 | 1360 | 1012.87 | 135 | 170 | 172 | 168 | 129 | 122 | 120 | 129 | 163 |
| 695.47 | 1221 | 811 | 989  | 809 | 818 | 767 | 996  | 965 | 1324 | 1013.15 | 131 | 171 | 170 | 168 | 126 | 123 | 122 | 126 | 158 |
| 695.81 | 1214 | 790 | 969  | 803 | 805 | 753 | 973  | 970 | 1334 | 1013.43 | 130 | 164 | 167 | 170 | 122 | 120 | 122 | 127 | 158 |
| 696.14 | 1215 | 800 | 959  | 796 | 819 | 746 | 973  | 946 | 1308 | 1013.71 | 128 | 169 | 168 | 165 | 122 | 119 | 120 | 128 | 157 |
| 696.48 | 1221 | 788 | 974  | 809 | 817 | 753 | 964  | 945 | 1337 | 1014    | 124 | 165 | 168 | 165 | 119 | 117 | 118 | 127 | 153 |
| 696.81 | 1208 | 802 | 976  | 799 | 806 | 741 | 976  | 945 | 1334 | 1014.28 | 123 | 163 | 170 | 166 | 117 | 117 | 116 | 126 | 154 |
| 697.15 | 1197 | 800 | 964  | 792 | 797 | 759 | 982  | 937 | 1330 | 1014.56 | 124 | 164 | 168 | 168 | 118 | 118 | 116 | 128 | 157 |
| 697.48 | 1206 | 787 | 954  | 787 | 800 | 748 | 968  | 953 | 1301 | 1014.85 | 125 | 164 | 167 | 165 | 118 | 118 | 119 | 128 | 151 |
| 697.82 | 1214 | 776 | 966  | 787 | 824 | 762 | 961  | 942 | 1319 | 1015.13 | 123 | 169 | 167 | 161 | 117 | 117 | 119 | 126 | 154 |
| 698.15 | 1206 | 772 | 951  | 786 | 794 | 742 | 933  | 927 | 1300 | 1015.41 | 128 | 168 | 168 | 163 | 121 | 119 | 117 | 129 | 153 |
| 698.49 | 1191 | 789 | 961  | 785 | 806 | 753 | 968  | 928 | 1308 | 1015.69 | 128 | 164 | 164 | 165 | 122 | 120 | 117 | 130 | 149 |
| 698.83 | 1205 | 789 | 939  | 780 | 801 | 755 | 944  | 918 | 1289 | 1015.98 | 125 | 168 | 171 | 166 | 119 | 115 | 116 | 131 | 152 |
| 699.16 | 1186 | 788 | 937  | 786 | 796 | 742 | 961  | 954 | 1289 | 1016.26 | 126 | 160 | 169 | 166 | 118 | 117 | 118 | 127 | 159 |
| 699.5  | 1192 | 777 | 953  | 786 | 794 | 754 | 947  | 934 | 1300 | 1016.54 | 126 | 164 | 166 | 174 | 118 | 118 | 122 | 128 | 160 |
| 699.83 | 1191 | 784 | 943  | 770 | 810 | 736 | 954  | 920 | 1310 | 1016.82 | 136 | 170 | 180 | 171 | 125 | 123 | 125 | 134 | 163 |
| 700.17 | 1195 | 760 | 933  | 777 | 795 | 737 | 934  | 925 | 1302 | 1017.1  | 135 | 169 | 171 | 168 | 125 | 121 | 124 | 134 | 162 |
| 700.5  | 1196 | 767 | 935  | 782 | 791 | 741 | 951  | 930 | 1296 | 1017.39 | 134 | 164 | 172 | 165 | 122 | 123 | 121 | 131 | 160 |
| 700.84 | 1190 | 775 | 943  | 785 | 782 | 733 | 941  | 918 | 1291 | 1017.67 | 133 | 170 | 172 | 168 | 121 | 123 | 118 | 132 | 156 |
| 701.17 | 1199 | 775 | 940  | 788 | 794 | 726 | 956  | 920 | 1299 | 1017.95 | 131 | 172 | 168 | 171 | 123 | 124 | 118 | 134 | 158 |
| 701.51 | 1169 | 763 | 926  | 760 | 785 | 732 | 938  | 893 | 1286 | 1018.23 | 133 | 173 | 173 | 169 | 121 | 121 | 121 | 133 | 164 |
| 701.84 | 1177 | 771 | 930  | 770 | 779 | 722 | 932  | 904 | 1270 | 1018.51 | 133 | 174 | 173 | 171 | 122 | 119 | 124 | 135 | 167 |
| 702.17 | 1175 | 765 | 940  | 768 | 775 | 725 | 952  | 909 | 1272 | 1018.8  | 140 | 166 | 178 | 168 | 123 | 120 | 124 | 134 | 166 |
| 702.51 | 1164 | 778 | 929  | 777 | 769 | 719 | 917  | 909 | 1277 | 1019.08 | 136 | 171 | 180 | 172 | 124 | 121 | 125 | 132 | 165 |
