# Supplementary material for: Sparse Representation for Different Animal Vertebra Classification along the Fixation Trajectory of Pedicle Screw
Source: Hindawi journal article supplement (doi:10.1155/2020/2521696), 2020-01-20
Supplement: f1 [file 2521696.f1.zip › 2521696.f1/2A+2B.pdf]

|        |     |     |     |     |     |     |     |     |     |        |     |     |     |      |     |     |     |     |     |
|--------|-----|-----|-----|-----|-----|-----|-----|-----|-----|--------|-----|-----|-----|------|-----|-----|-----|-----|-----|
| 339.99 | 0   | 0   | 0   | 0   | 0   | 0   | 0   | 0   | 0   | 702.84 | 499 | 768 | 795 | 1001 | 821 | 925 | 807 | 674 | 457 |
| 340.36 | 134 | 119 | 123 | 123 | 120 | 120 | 119 | 118 | 130 | 703.18 | 498 | 766 | 790 | 998  | 821 | 924 | 802 | 670 | 462 |
| 340.73 | 132 | 119 | 119 | 122 | 119 | 117 | 118 | 117 | 126 | 703.51 | 498 | 765 | 795 | 1002 | 822 | 922 | 811 | 680 | 466 |
| 341.1  | 134 | 121 | 120 | 124 | 120 | 119 | 120 | 120 | 126 | 703.85 | 492 | 761 | 795 | 995  | 820 | 917 | 806 | 680 | 471 |
| 341.48 | 137 | 123 | 120 | 125 | 121 | 122 | 123 | 123 | 127 | 704.18 | 494 | 759 | 793 | 999  | 818 | 913 | 805 | 680 | 467 |
| 341.85 | 139 | 124 | 120 | 123 | 117 | 121 | 122 | 120 | 130 | 704.52 | 491 | 758 | 792 | 991  | 813 | 911 | 792 | 669 | 463 |
| 342.22 | 135 | 122 | 119 | 125 | 120 | 123 | 121 | 121 | 133 | 704.85 | 493 | 763 | 791 | 991  | 816 | 911 | 788 | 667 | 453 |
| 342.59 | 139 | 120 | 120 | 124 | 123 | 121 | 123 | 122 | 131 | 705.19 | 499 | 768 | 788 | 985  | 817 | 918 | 793 | 669 | 454 |
| 342.96 | 136 | 115 | 116 | 120 | 121 | 118 | 117 | 116 | 123 | 705.52 | 497 | 770 | 787 | 982  | 817 | 914 | 798 | 663 | 456 |
| 343.34 | 140 | 119 | 123 | 125 | 125 | 123 | 122 | 120 | 133 | 705.85 | 494 | 763 | 782 | 981  | 806 | 903 | 799 | 658 | 461 |
| 343.71 | 133 | 114 | 120 | 120 | 120 | 115 | 116 | 115 | 130 | 706.19 | 485 | 763 | 788 | 978  | 806 | 891 | 792 | 652 | 463 |
| 344.08 | 138 | 120 | 128 | 124 | 124 | 121 | 119 | 115 | 132 | 706.52 | 483 | 760 | 787 | 971  | 801 | 895 | 795 | 663 | 462 |
| 344.45 | 135 | 118 | 126 | 122 | 122 | 119 | 119 | 119 | 130 | 706.86 | 486 | 761 | 783 | 968  | 803 | 895 | 790 | 657 | 456 |
| 344.82 | 137 | 116 | 125 | 122 | 121 | 121 | 119 | 119 | 128 | 707.19 | 485 | 753 | 772 | 964  | 798 | 891 | 787 | 655 | 447 |
| 345.19 | 134 | 115 | 125 | 122 | 115 | 117 | 116 | 116 | 127 | 707.52 | 485 | 749 | 766 | 968  | 801 | 891 | 777 | 646 | 448 |
| 345.57 | 140 | 125 | 127 | 125 | 126 | 122 | 122 | 121 | 136 | 707.86 | 481 | 746 | 762 | 958  | 799 | 890 | 779 | 659 | 453 |
| 345.94 | 135 | 122 | 123 | 118 | 123 | 119 | 119 | 116 | 130 | 708.19 | 486 | 743 | 762 | 960  | 797 | 893 | 774 | 654 | 456 |
| 346.31 | 137 | 122 | 125 | 120 | 124 | 122 | 121 | 117 | 132 | 708.53 | 489 | 743 | 767 | 955  | 787 | 883 | 778 | 653 | 447 |
| 346.68 | 138 | 122 | 125 | 121 | 122 | 122 | 122 | 117 | 133 | 708.86 | 489 | 738 | 769 | 950  | 787 | 885 | 773 | 645 | 445 |
| 347.05 | 138 | 123 | 124 | 125 | 120 | 123 | 123 | 120 | 134 | 709.19 | 483 | 740 | 769 | 942  | 787 | 880 | 772 | 652 | 443 |
| 347.42 | 136 | 121 | 123 | 125 | 120 | 121 | 123 | 121 | 134 | 709.53 | 475 | 739 | 758 | 932  | 785 | 883 | 762 | 646 | 445 |
| 347.8  | 137 | 121 | 124 | 126 | 121 | 122 | 125 | 124 | 134 | 709.86 | 475 | 744 | 756 | 940  | 780 | 883 | 758 | 644 | 440 |
| 348.17 | 138 | 121 | 125 | 124 | 122 | 123 | 126 | 124 | 133 | 710.19 | 475 | 737 | 750 | 943  | 771 | 883 | 763 | 640 | 437 |
| 348.54 | 137 | 119 | 123 | 120 | 120 | 122 | 123 | 123 | 129 | 710.53 | 482 | 740 | 756 | 947  | 773 | 888 | 762 | 648 | 439 |
| 348.91 | 134 | 117 | 121 | 118 | 119 | 121 | 119 | 118 | 125 | 710.86 | 480 | 729 | 757 | 944  | 773 | 882 | 766 | 646 | 439 |
| 349.28 | 134 | 117 | 122 | 121 | 120 | 119 | 118 | 117 | 126 | 711.2  | 479 | 728 | 759 | 938  | 778 | 875 | 756 | 644 | 438 |
| 349.65 | 139 | 121 | 127 | 126 | 124 | 123 | 122 | 120 | 131 | 711.53 | 476 | 723 | 755 | 935  | 778 | 860 | 762 | 638 | 440 |
| 350.03 | 143 | 123 | 131 | 128 | 126 | 126 | 125 | 124 | 135 | 711.86 | 475 | 724 | 749 | 931  | 778 | 854 | 761 | 639 | 438 |
| 350.4  | 142 | 121 | 131 | 127 | 126 | 126 | 123 | 123 | 134 | 712.2  | 478 | 722 | 751 | 930  | 771 | 851 | 761 | 632 | 442 |
| 350.77 | 139 | 119 | 127 | 126 | 127 | 123 | 122 | 120 | 131 | 712.53 | 474 | 719 | 746 | 928  | 767 | 861 | 754 | 631 | 437 |
| 351.14 | 138 | 119 | 125 | 125 | 128 | 121 | 122 | 119 | 130 | 712.86 | 474 | 715 | 744 | 928  | 765 | 859 | 752 | 630 | 435 |
| 351.51 | 139 | 120 | 125 | 124 | 130 | 120 | 123 | 119 | 129 | 713.2  | 473 | 714 | 742 | 927  | 760 | 863 | 756 | 637 | 433 |
| 351.88 | 139 | 119 | 126 | 122 | 128 | 120 | 123 | 119 | 129 | 713.53 | 476 | 715 | 740 | 927  | 763 | 851 | 749 | 638 | 434 |
| 352.25 | 138 | 119 | 126 | 122 | 127 | 120 | 122 | 121 | 131 | 713.86 | 477 | 717 | 741 | 922  | 760 | 853 | 745 | 640 | 435 |
| 352.62 | 134 | 118 | 123 | 121 | 124 | 120 | 120 | 120 | 132 | 714.2  | 472 | 713 | 732 | 916  | 759 | 841 | 734 | 631 | 431 |
| 353    | 132 | 119 | 121 | 122 | 123 | 120 | 118 | 119 | 130 | 714.53 | 466 | 708 | 729 | 907  | 752 | 838 | 731 | 623 | 429 |
| 353.37 | 132 | 118 | 121 | 122 | 122 | 119 | 117 | 119 | 129 | 714.86 | 462 | 708 | 723 | 904  | 754 | 835 | 727 | 612 | 428 |
| 353.74 | 134 | 119 | 122 | 124 | 125 | 119 | 119 | 120 | 128 | 715.19 | 459 | 708 | 729 | 911  | 757 | 844 | 735 | 616 | 431 |
| 354.11 | 137 | 120 | 125 | 125 | 125 | 120 | 123 | 121 | 130 | 715.53 | 463 | 707 | 729 | 909  | 755 | 845 | 730 | 612 | 432 |
| 354.48 | 139 | 121 | 127 | 125 | 125 | 122 | 125 | 120 | 132 | 715.86 | 464 | 706 | 724 | 908  | 752 | 848 | 731 | 620 | 431 |
| 354.85 | 140 | 123 | 127 | 124 | 125 | 124 | 125 | 120 | 132 | 716.19 | 461 | 705 | 717 | 894  | 743 | 843 | 723 | 609 | 427 |
| 355.22 | 138 | 123 | 126 | 124 | 125 | 125 | 124 | 122 | 131 | 716.53 | 455 | 703 | 712 | 894  | 741 | 837 | 726 | 610 | 425 |
| 355.59 | 137 | 124 | 124 | 123 | 125 | 126 | 123 | 121 | 130 | 716.86 | 453 | 704 | 715 | 881  | 738 | 830 | 720 | 605 | 425 |
| 355.96 | 135 | 122 | 124 | 124 | 125 | 125 | 122 | 120 | 129 | 717.19 | 455 | 701 | 713 | 878  | 744 | 825 | 718 | 609 | 421 |
| 356.34 | 134 | 119 | 124 | 124 | 125 | 124 | 121 | 118 | 129 | 717.52 | 454 | 694 | 710 | 873  | 738 | 830 | 713 | 614 | 420 |
| 356.71 | 134 | 118 | 126 | 125 | 127 | 125 | 123 | 121 | 131 | 717.86 | 451 | 687 | 703 | 876  | 730 | 820 | 711 | 602 | 418 |
| 357.08 | 137 | 120 | 125 | 125 | 127 | 126 | 125 | 123 | 133 | 718.19 | 446 | 688 | 702 | 876  | 725 | 817 | 713 | 601 | 421 |
| 357.45 | 137 | 120 | 123 | 124 | 124 | 124 | 124 | 122 | 133 | 718.52 | 451 | 691 | 704 | 870  | 726 | 813 | 718 | 597 | 419 |
| 357.82 | 136 | 121 | 122 | 124 | 122 | 121 | 121 | 120 | 132 | 718.85 | 451 | 683 | 706 | 867  | 724 | 813 | 717 | 597 | 415 |
| 358.19 | 135 | 122 | 124 | 126 | 122 | 120 | 122 | 119 | 131 | 719.19 | 453 | 680 | 701 | 860  | 717 | 808 | 710 | 594 | 413 |
| 358.56 | 136 | 121 | 126 | 126 | 125 | 121 | 123 | 120 | 131 | 719.52 | 448 | 678 | 694 | 854  | 714 | 799 | 706 | 587 | 404 |
| 358.93 | 137 | 121 | 125 | 125 | 125 | 122 | 123 | 121 | 131 | 719.85 | 449 | 679 | 696 | 848  | 714 | 800 | 712 | 590 | 406 |
| 359.3  | 135 | 118 | 121 | 123 | 124 | 121 | 122 | 120 | 131 | 720.18 | 445 | 676 | 695 | 844  | 711 | 800 | 707 | 589 | 399 |
| 359.67 | 138 | 122 | 124 | 127 | 128 | 124 | 125 | 122 | 133 | 720.52 | 441 | 667 | 692 | 844  | 705 | 798 | 700 | 591 | 402 |
| 360.04 | 140 | 124 | 126 | 129 | 131 | 126 | 127 | 124 | 133 | 720.85 | 435 | 667 | 686 | 839  | 697 | 789 | 686 | 585 | 400 |
| 360.41 | 142 | 125 | 128 | 130 | 131 | 128 | 128 | 127 | 133 | 721.18 | 437 | 664 | 685 | 835  | 695 | 784 | 683 | 582 | 405 |
| 360.78 | 139 | 123 | 125 | 128 | 128 | 127 | 126 | 127 | 131 | 721.51 | 435 | 664 | 685 | 832  | 695 | 782 | 682 | 581 | 405 |
| 361.15 | 137 | 121 | 121 | 125 | 123 | 125 | 123 | 124 | 130 | 721.84 | 436 | 660 | 677 | 836  | 689 | 776 | 678 | 581 | 402 |
| 361.53 | 138 | 121 | 120 | 124 | 122 | 122 | 122 | 121 | 130 | 722.18 | 431 | 653 | 675 | 837  | 689 | 771 | 675 | 582 | 400 |
| 361.9  | 139 | 122 | 121 | 123 | 121 | 121 | 121 | 119 | 130 | 722.51 | 433 | 652 | 670 | 837  | 686 | 764 | 671 | 580 | 403 |
| 362.27 | 140 | 123 | 123 | 125 | 121 | 121 | 123 | 121 | 131 | 722.84 | 432 | 650 | 671 | 831  | 689 | 764 | 672 | 581 | 402 |
| 362.64 | 137 | 121 | 123 | 124 | 119 | 121 | 120 | 122 | 128 | 723.17 | 440 | 655 | 668 | 832  | 691 | 764 | 675 | 580 | 399 |
| 363.01 | 135 | 121 | 126 | 124 | 121 | 122 | 120 | 123 | 128 | 723.5  | 436 | 656 | 664 | 832  | 690 | 768 | 678 | 578 | 399 |
| 363.38 | 135 | 119 | 125 | 123 | 122 | 122 | 120 | 122 | 127 | 723.84 | 436 | 653 | 660 | 829  | 691 | 768 | 678 | 579 | 398 |
| 363.75 | 135 | 118 | 123 | 121 | 121 | 121 | 121 | 121 | 126 | 724.17 | 434 | 652 | 659 | 831  | 689 | 773 | 677 | 580 | 398 |
| 364.12 | 135 | 117 | 122 | 121 | 121 | 121 | 121 | 120 | 127 | 724.5  | 435 | 655 | 665 | 830  | 691 | 770 | 677 | 581 | 397 |
| 364.49 | 135 | 116 | 123 | 121 | 121 | 122 | 120 | 121 | 127 | 724.83 | 434 | 659 | 663 | 826  | 697 | 770 | 676 | 574 | 399 |
| 364.86 | 137 | 116 | 123 | 122 | 122 | 124 | 121 | 121 | 130 | 725.16 | 429 | 653 | 662 | 816  | 695 | 767 | 672 | 568 | 401 |
| 365.23 | 137 | 114 | 120 | 121 | 121 | 124 | 120 | 120 | 128 | 725.49 | 426 | 646 | 658 | 809  | 694 | 768 | 668 | 569 | 401 |
| 365.6  | 136 | 113 | 119 | 120 | 120 | 123 | 120 | 119 | 129 | 725.83 | 429 | 647 | 660 | 813  | 690 | 772 | 670 | 573 | 400 |
| 365.97 | 137 | 115 | 120 | 123 | 122 | 123 | 121 | 120 | 131 | 726.16 | 429 | 652 | 656 | 813  | 688 | 767 | 666 | 571 | 397 |
| 366.34 | 141 | 121 | 125 | 129 | 126 | 127 | 125 | 124 | 137 | 726.49 | 429 | 653 | 654 | 817  | 686 | 766 | 663 | 564 | 390 |
| 366.71 | 141 | 125 | 127 | 130 | 129 | 129 | 125 | 126 | 138 | 726.82 | 427 | 647 | 651 | 815  | 681 | 765 | 661 |     |     |

|        |     |     |     |     |     |     |     |     |     |        |     |     |     |     |     |     |     |     |     |
|--------|-----|-----|-----|-----|-----|-----|-----|-----|-----|--------|-----|-----|-----|-----|-----|-----|-----|-----|-----|
| 370.41 | 136 | 121 | 125 | 126 | 127 | 126 | 123 | 124 | 132 | 730.13 | 423 | 646 | 649 | 802 | 663 | 751 | 664 | 559 | 386 |
| 370.78 | 138 | 122 | 127 | 128 | 129 | 127 | 123 | 126 | 134 | 730.46 | 424 | 643 | 646 | 806 | 669 | 751 | 666 | 565 | 390 |
| 371.15 | 136 | 123 | 125 | 126 | 127 | 124 | 121 | 124 | 131 | 730.79 | 424 | 645 | 649 | 804 | 673 | 754 | 663 | 562 | 393 |
| 371.52 | 137 | 126 | 125 | 126 | 126 | 123 | 121 | 125 | 130 | 731.13 | 423 | 640 | 647 | 802 | 676 | 745 | 655 | 564 | 392 |
| 371.89 | 135 | 124 | 124 | 125 | 124 | 124 | 120 | 123 | 128 | 731.46 | 425 | 640 | 655 | 799 | 679 | 750 | 659 | 562 | 393 |
| 372.26 | 135 | 124 | 126 | 125 | 123 | 125 | 121 | 125 | 129 | 731.79 | 421 | 635 | 651 | 796 | 672 | 740 | 660 | 558 | 389 |
| 372.63 | 134 | 122 | 127 | 125 | 123 | 126 | 121 | 125 | 130 | 732.12 | 421 | 636 | 648 | 795 | 669 | 745 | 659 | 559 | 391 |
| 373    | 135 | 120 | 126 | 124 | 124 | 125 | 123 | 125 | 130 | 732.45 | 415 | 632 | 645 | 791 | 663 | 745 | 659 | 562 | 391 |
| 373.37 | 136 | 118 | 123 | 122 | 123 | 123 | 122 | 122 | 128 | 732.78 | 414 | 630 | 644 | 787 | 666 | 740 | 655 | 562 | 391 |
| 373.73 | 137 | 118 | 123 | 124 | 122 | 123 | 122 | 121 | 128 | 733.11 | 416 | 630 | 649 | 793 | 670 | 744 | 656 | 556 | 390 |
| 374.1  | 140 | 120 | 124 | 128 | 124 | 123 | 123 | 124 | 131 | 733.44 | 423 | 632 | 647 | 798 | 670 | 738 | 658 | 552 | 385 |
| 374.47 | 140 | 123 | 124 | 129 | 125 | 125 | 124 | 125 | 134 | 733.77 | 425 | 633 | 650 | 806 | 670 | 745 | 658 | 552 | 384 |
| 374.84 | 141 | 126 | 127 | 130 | 127 | 127 | 126 | 127 | 136 | 734.1  | 428 | 635 | 654 | 798 | 662 | 739 | 656 | 554 | 385 |
| 375.21 | 138 | 126 | 126 | 126 | 124 | 124 | 124 | 124 | 134 | 734.43 | 427 | 634 | 653 | 798 | 667 | 735 | 652 | 550 | 384 |
| 375.58 | 139 | 124 | 126 | 124 | 125 | 123 | 126 | 124 | 134 | 734.76 | 428 | 634 | 646 | 795 | 664 | 737 | 651 | 550 | 385 |
| 375.95 | 138 | 122 | 124 | 123 | 124 | 121 | 126 | 123 | 132 | 735.09 | 421 | 627 | 640 | 795 | 669 | 734 | 650 | 553 | 382 |
| 376.32 | 138 | 122 | 125 | 124 | 125 | 122 | 127 | 123 | 132 | 735.42 | 417 | 627 | 642 | 795 | 665 | 743 | 650 | 558 | 386 |
| 376.69 | 138 | 124 | 126 | 127 | 126 | 125 | 127 | 125 | 131 | 735.75 | 416 | 624 | 649 | 799 | 661 | 744 | 656 | 564 | 383 |
| 377.06 | 140 | 125 | 126 | 128 | 127 | 128 | 126 | 126 | 132 | 736.08 | 419 | 631 | 650 | 803 | 660 | 743 | 656 | 558 | 383 |
| 377.43 | 141 | 125 | 126 | 130 | 126 | 129 | 125 | 126 | 134 | 736.41 | 416 | 628 | 646 | 797 | 656 | 735 | 655 | 553 | 382 |
| 377.8  | 141 | 124 | 124 | 128 | 123 | 126 | 123 | 122 | 133 | 736.74 | 415 | 636 | 650 | 798 | 663 | 734 | 659 | 552 | 385 |
| 378.17 | 140 | 121 | 123 | 125 | 122 | 121 | 121 | 120 | 130 | 737.07 | 412 | 630 | 652 | 794 | 663 | 739 | 658 | 555 | 383 |
| 378.54 | 139 | 119 | 122 | 123 | 122 | 119 | 122 | 119 | 129 | 737.4  | 416 | 636 | 652 | 793 | 666 | 742 | 657 | 555 | 377 |
| 378.9  | 139 | 119 | 123 | 124 | 122 | 122 | 123 | 120 | 129 | 737.73 | 419 | 633 | 646 | 783 | 660 | 744 | 650 | 551 | 376 |
| 379.27 | 140 | 121 | 123 | 124 | 122 | 124 | 123 | 121 | 129 | 738.06 | 419 | 635 | 647 | 778 | 657 | 744 | 653 | 550 | 377 |
| 379.64 | 140 | 123 | 123 | 123 | 122 | 123 | 121 | 120 | 128 | 738.39 | 420 | 629 | 645 | 784 | 659 | 744 | 649 | 553 | 380 |
| 380.01 | 142 | 126 | 125 | 125 | 124 | 124 | 123 | 123 | 130 | 738.72 | 415 | 632 | 644 | 789 | 663 | 740 | 649 | 554 | 380 |
| 380.38 | 143 | 126 | 126 | 129 | 126 | 126 | 123 | 124 | 132 | 739.05 | 418 | 629 | 637 | 792 | 667 | 741 | 649 | 552 | 382 |
| 380.75 | 141 | 124 | 126 | 129 | 127 | 127 | 122 | 124 | 134 | 739.38 | 414 | 632 | 640 | 786 | 662 | 735 | 650 | 549 | 378 |
| 381.12 | 138 | 119 | 125 | 125 | 124 | 124 | 119 | 120 | 130 | 739.71 | 414 | 628 | 638 | 784 | 666 | 737 | 648 | 546 | 378 |
| 381.49 | 138 | 119 | 125 | 123 | 125 | 124 | 119 | 119 | 131 | 740.04 | 411 | 630 | 643 | 789 | 657 | 737 | 647 | 552 | 378 |
| 381.86 | 140 | 120 | 125 | 123 | 125 | 124 | 121 | 120 | 129 | 740.37 | 413 | 628 | 642 | 794 | 660 | 740 | 648 | 552 | 380 |
| 382.22 | 140 | 120 | 125 | 123 | 125 | 124 | 123 | 123 | 130 | 740.7  | 413 | 629 | 639 | 794 | 653 | 733 | 647 | 548 | 383 |
| 382.59 | 140 | 120 | 127 | 124 | 125 | 125 | 125 | 125 | 129 | 741.03 | 422 | 633 | 643 | 796 | 660 | 733 | 649 | 552 | 385 |
| 382.96 | 138 | 120 | 128 | 123 | 124 | 125 | 123 | 124 | 130 | 741.36 | 422 | 635 | 643 | 792 | 662 | 734 | 649 | 553 | 385 |
| 383.33 | 139 | 121 | 130 | 126 | 125 | 127 | 123 | 123 | 132 | 741.69 | 422 | 631 | 646 | 797 | 660 | 738 | 651 | 557 | 383 |
| 383.7  | 138 | 121 | 130 | 126 | 123 | 126 | 122 | 121 | 132 | 742.02 | 412 | 624 | 638 | 789 | 657 | 734 | 648 | 552 | 377 |
| 384.07 | 141 | 122 | 131 | 128 | 124 | 128 | 124 | 124 | 134 | 742.35 | 413 | 623 | 637 | 792 | 654 | 735 | 656 | 555 | 378 |
| 384.44 | 142 | 122 | 129 | 129 | 125 | 127 | 124 | 125 | 134 | 742.68 | 411 | 623 | 632 | 789 | 653 | 733 | 651 | 552 | 374 |
| 384.81 | 140 | 122 | 126 | 128 | 123 | 125 | 124 | 125 | 133 | 743    | 410 | 619 | 632 | 786 | 649 | 731 | 650 | 549 | 375 |
| 385.17 | 142 | 123 | 127 | 127 | 124 | 125 | 126 | 126 | 135 | 743.33 | 409 | 616 | 629 | 780 | 651 | 722 | 637 | 548 | 374 |
| 385.54 | 139 | 120 | 124 | 123 | 121 | 120 | 123 | 122 | 131 | 743.66 | 411 | 614 | 633 | 781 | 650 | 722 | 636 | 549 | 374 |
| 385.91 | 141 | 120 | 125 | 124 | 124 | 122 | 123 | 123 | 132 | 743.99 | 415 | 615 | 629 | 778 | 646 | 719 | 635 | 546 | 370 |
| 386.28 | 141 | 119 | 124 | 124 | 123 | 121 | 120 | 121 | 130 | 744.32 | 412 | 609 | 626 | 776 | 642 | 717 | 635 | 536 | 366 |
| 386.65 | 143 | 122 | 126 | 126 | 125 | 126 | 121 | 122 | 134 | 744.65 | 405 | 606 | 621 | 765 | 637 | 709 | 629 | 531 | 365 |
| 387.02 | 143 | 122 | 127 | 126 | 122 | 125 | 119 | 121 | 134 | 744.98 | 399 | 608 | 622 | 767 | 645 | 710 | 627 | 529 | 367 |
| 387.38 | 140 | 121 | 126 | 126 | 122 | 123 | 119 | 119 | 132 | 745.31 | 397 | 611 | 622 | 766 | 642 | 711 | 624 | 532 | 366 |
| 387.75 | 141 | 122 | 127 | 129 | 125 | 124 | 122 | 120 | 134 | 745.64 | 398 | 609 | 619 | 772 | 647 | 710 | 629 | 533 | 365 |
| 388.12 | 141 | 125 | 128 | 130 | 126 | 125 | 124 | 122 | 136 | 745.96 | 402 | 609 | 612 | 768 | 643 | 709 | 630 | 532 | 366 |
| 388.49 | 140 | 123 | 126 | 128 | 123 | 122 | 122 | 121 | 135 | 746.29 | 402 | 609 | 615 | 769 | 641 | 710 | 635 | 540 | 368 |
| 388.86 | 141 | 122 | 127 | 127 | 122 | 120 | 121 | 121 | 135 | 746.62 | 407 | 609 | 619 | 764 | 637 | 712 | 632 | 541 | 366 |
| 389.23 | 145 | 124 | 130 | 129 | 124 | 123 | 123 | 124 | 137 | 746.95 | 408 | 608 | 622 | 765 | 636 | 706 | 626 | 536 | 364 |
| 389.59 | 148 | 128 | 133 | 132 | 127 | 128 | 126 | 129 | 143 | 747.28 | 410 | 602 | 622 | 764 | 635 | 707 | 621 | 530 | 368 |
| 389.96 | 146 | 129 | 132 | 131 | 128 | 131 | 125 | 131 | 145 | 747.61 | 408 | 601 | 617 | 759 | 633 | 700 | 617 | 522 | 368 |
| 390.33 | 142 | 124 | 127 | 127 | 124 | 128 | 120 | 126 | 141 | 747.94 | 404 | 600 | 619 | 760 | 635 | 701 | 623 | 533 | 369 |
| 390.7  | 142 | 123 | 124 | 125 | 123 | 127 | 119 | 123 | 136 | 748.26 | 401 | 602 | 610 | 754 | 636 | 696 | 624 | 529 | 368 |
| 391.07 | 139 | 119 | 122 | 121 | 118 | 123 | 117 | 118 | 130 | 748.59 | 402 | 611 | 613 | 757 | 638 | 699 | 629 | 539 | 372 |
| 391.43 | 138 | 119 | 123 | 119 | 118 | 121 | 119 | 118 | 130 | 748.92 | 404 | 604 | 607 | 746 | 629 | 703 | 625 | 528 | 366 |
| 391.8  | 137 | 119 | 125 | 119 | 117 | 121 | 120 | 118 | 130 | 749.25 | 406 | 605 | 605 | 750 | 630 | 706 | 623 | 523 | 365 |
| 392.17 | 138 | 121 | 125 | 122 | 120 | 123 | 122 | 118 | 131 | 749.58 | 405 | 595 | 601 | 749 | 629 | 705 | 618 | 516 | 364 |
| 392.54 | 138 | 121 | 123 | 125 | 121 | 124 | 123 | 120 | 130 | 749.91 | 402 | 597 | 599 | 750 | 629 | 700 | 620 | 518 | 368 |
| 392.91 | 137 | 121 | 121 | 125 | 121 | 123 | 122 | 120 | 130 | 750.23 | 400 | 600 | 602 | 749 | 626 | 695 | 621 | 521 | 368 |
| 393.27 | 140 | 124 | 124 | 126 | 124 | 126 | 124 | 123 | 133 | 750.56 | 398 | 597 | 605 | 748 | 624 | 695 | 620 | 523 | 369 |
| 393.64 | 141 | 126 | 126 | 123 | 124 | 127 | 124 | 123 | 134 | 750.89 | 396 | 600 | 606 | 752 | 625 | 694 | 614 | 519 | 368 |
| 394.01 | 139 | 124 | 125 | 122 | 122 | 126 | 121 | 121 | 134 | 751.22 | 395 | 599 | 607 | 746 | 624 | 697 | 611 | 524 | 363 |
| 394.38 | 137 | 122 | 124 | 121 | 120 | 122 | 119 | 119 | 134 | 751.55 | 397 | 601 | 605 | 740 | 617 | 695 | 608 | 524 | 363 |
| 394.75 | 138 | 121 | 124 | 123 | 120 | 121 | 119 | 119 | 135 | 751.87 | 397 | 594 | 602 | 740 | 613 | 695 | 611 | 526 | 366 |
| 395.11 | 141 | 122 | 125 | 125 | 124 | 124 | 121 | 120 | 137 | 752.2  | 396 | 584 | 595 | 740 | 612 | 691 | 610 | 517 | 366 |
| 395.48 | 142 | 122 | 125 | 126 | 126 | 122 | 120 | 138 |     | 752.53 | 395 | 581 | 594 | 740 | 623 | 688 | 616 | 515 | 365 |
| 395.85 | 140 | 121 | 123 | 125 | 124 | 124 | 119 | 118 | 136 | 752.86 | 394 | 581 | 590 | 732 | 621 | 680 | 614 | 516 | 359 |
| 396.22 | 139 | 121 | 122 | 125 | 123 | 123 | 118 | 118 | 135 | 753.19 | 394 | 591 | 595 | 730 | 623 | 682 | 615 | 519 | 361 |
| 396.58 | 139 | 121 | 122 | 123 | 121 | 122 | 118 | 118 | 134 | 753.51 | 394 | 592 | 590 | 729 | 615 | 680 | 613 | 516 | 353 |
| 396.95 | 142 | 121 | 122 | 122 | 122 | 123 | 120 | 119 | 135 | 753.84 | 396 | 591 | 594 | 731 | 622 |     |     |     |     |

|        |     |     |     |     |     |     |      |      |     |        |     |     |     |       |     |     |     |     |     |
|--------|-----|-----|-----|-----|-----|-----|------|------|-----|--------|-----|-----|-----|-------|-----|-----|-----|-----|-----|
| 400.63 | 138 | 117 | 121 | 120 | 120 | 119 | 119  | 120  | 132 | 757.12 | 374 | 570 | 569 | 711   | 587 | 660 | 582 | 495 | 339 |
| 400.99 | 140 | 118 | 122 | 121 | 121 | 122 | 118  | 122  | 133 | 757.44 | 371 | 572 | 566 | 704   | 588 | 664 | 580 | 499 | 343 |
| 401.36 | 142 | 118 | 123 | 121 | 120 | 123 | 118  | 120  | 134 | 757.77 | 378 | 570 | 566 | 703   | 594 | 668 | 581 | 502 | 346 |
| 401.73 | 142 | 118 | 124 | 119 | 120 | 124 | 120  | 118  | 134 | 758.1  | 383 | 568 | 566 | 700   | 598 | 664 | 581 | 497 | 344 |
| 402.09 | 142 | 117 | 123 | 119 | 120 | 124 | 120  | 117  | 134 | 758.42 | 385 | 570 | 569 | 706   | 590 | 663 | 579 | 501 | 342 |
| 402.46 | 142 | 118 | 124 | 122 | 122 | 126 | 121  | 118  | 135 | 758.75 | 386 | 573 | 568 | 708   | 588 | 662 | 584 | 503 | 348 |
| 402.83 | 143 | 116 | 122 | 122 | 122 | 125 | 118  | 118  | 132 | 759.08 | 385 | 575 | 574 | 706   | 589 | 665 | 586 | 508 | 352 |
| 403.2  | 143 | 116 | 125 | 123 | 124 | 125 | 118  | 120  | 133 | 759.4  | 385 | 568 | 570 | 704   | 583 | 663 | 585 | 508 | 351 |
| 403.56 | 141 | 115 | 124 | 122 | 123 | 123 | 116  | 119  | 132 | 759.73 | 381 | 570 | 573 | 699   | 583 | 661 | 580 | 509 | 343 |
| 403.93 | 139 | 116 | 124 | 123 | 123 | 123 | 118  | 120  | 132 | 760.06 | 379 | 569 | 568 | 700   | 577 | 664 | 582 | 511 | 346 |
| 404.3  | 137 | 115 | 122 | 121 | 122 | 121 | 119  | 118  | 131 | 760.38 | 377 | 570 | 565 | 693   | 584 | 660 | 586 | 509 | 345 |
| 404.66 | 137 | 115 | 121 | 121 | 122 | 119 | 119  | 117  | 131 | 760.71 | 376 | 567 | 559 | 692   | 581 | 659 | 589 | 504 | 348 |
| 405.03 | 139 | 116 | 120 | 121 | 123 | 118 | 118  | 117  | 134 | 761.04 | 377 | 561 | 557 | 693   | 583 | 651 | 584 | 504 | 347 |
| 405.4  | 139 | 116 | 119 | 119 | 122 | 118 | 115  | 116  | 134 | 761.36 | 375 | 561 | 558 | 688   | 575 | 650 | 577 | 504 | 352 |
| 405.76 | 137 | 114 | 117 | 115 | 118 | 117 | 111  | 113  | 130 | 761.69 | 373 | 563 | 556 | 686   | 570 | 650 | 576 | 503 | 350 |
| 406.13 | 135 | 112 | 114 | 111 | 115 | 116 | 110  | 110  | 126 | 762.02 | 370 | 567 | 553 | 682   | 566 | 648 | 571 | 494 | 350 |
| 406.5  | 133 | 112 | 112 | 110 | 113 | 115 | 110  | 110  | 126 | 762.34 | 367 | 560 | 550 | 677   | 572 | 646 | 571 | 487 | 345 |
| 406.86 | 136 | 113 | 114 | 114 | 116 | 118 | 112  | 112  | 130 | 762.67 | 368 | 553 | 551 | 678   | 573 | 640 | 565 | 479 | 342 |
| 407.23 | 137 | 112 | 115 | 116 | 116 | 119 | 112  | 113  | 131 | 763    | 369 | 551 | 555 | 679   | 575 | 641 | 566 | 484 | 337 |
| 407.6  | 140 | 114 | 117 | 119 | 118 | 121 | 114  | 114  | 133 | 763.32 | 371 | 557 | 556 | 687   | 571 | 641 | 570 | 487 | 336 |
| 407.96 | 138 | 114 | 114 | 117 | 116 | 119 | 113  | 114  | 133 | 763.65 | 372 | 557 | 552 | 679   | 573 | 642 | 573 | 494 | 337 |
| 408.33 | 138 | 116 | 115 | 118 | 117 | 120 | 116  | 116  | 134 | 763.98 | 371 | 555 | 548 | 676   | 566 | 645 | 575 | 492 | 339 |
| 408.7  | 137 | 114 | 115 | 117 | 115 | 117 | 114  | 114  | 131 | 764.3  | 370 | 545 | 542 | 670   | 560 | 639 | 573 | 488 | 336 |
| 409.06 | 135 | 112 | 116 | 116 | 113 | 115 | 113  | 110  | 129 | 764.63 | 364 | 539 | 539 | 668   | 557 | 636 | 569 | 486 | 335 |
| 409.43 | 135 | 111 | 116 | 116 | 113 | 114 | 113  | 107  | 127 | 764.95 | 364 | 539 | 542 | 667   | 561 | 638 | 567 | 485 | 337 |
| 409.8  | 138 | 114 | 117 | 117 | 116 | 115 | 116  | 108  | 128 | 765.28 | 361 | 542 | 540 | 663   | 559 | 633 | 559 | 483 | 336 |
| 410.16 | 142 | 117 | 118 | 121 | 117 | 117 | 118  | 112  | 130 | 765.61 | 364 | 548 | 542 | 669   | 556 | 630 | 558 | 487 | 338 |
| 410.53 | 141 | 114 | 118 | 119 | 115 | 116 | 116  | 113  | 131 | 765.93 | 360 | 539 | 536 | 663   | 552 | 620 | 556 | 481 | 333 |
| 410.89 | 136 | 109 | 113 | 113 | 110 | 113 | 110  | 109  | 130 | 766.26 | 365 | 539 | 536 | 666   | 552 | 627 | 558 | 481 | 336 |
| 411.26 | 135 | 108 | 113 | 110 | 110 | 114 | 109  | 106  | 130 | 766.58 | 360 | 529 | 532 | 656   | 549 | 623 | 558 | 468 | 330 |
| 411.63 | 136 | 111 | 114 | 109 | 110 | 115 | 110  | 105  | 130 | 766.91 | 357 | 529 | 531 | 648   | 544 | 623 | 555 | 466 | 324 |
| 411.99 | 141 | 113 | 120 | 115 | 113 | 117 | 115  | 109  | 133 | 767.23 | 352 | 522 | 530 | 648   | 544 | 612 | 547 | 459 | 324 |
| 412.36 | 140 | 112 | 121 | 116 | 111 | 115 | 114  | 110  | 131 | 767.56 | 357 | 527 | 529 | 649   | 548 | 608 | 545 | 462 | 330 |
| 412.73 | 137 | 111 | 120 | 114 | 109 | 113 | 110  | 110  | 129 | 767.89 | 354 | 522 | 526 | 652   | 545 | 606 | 540 | 458 | 333 |
| 413.09 | 134 | 110 | 117 | 112 | 108 | 112 | 107  | 108  | 127 | 768.21 | 355 | 522 | 527 | 645   | 543 | 605 | 541 | 457 | 327 |
| 413.46 | 133 | 110 | 116 | 111 | 108 | 113 | 106  | 106  | 127 | 768.54 | 352 | 517 | 528 | 644   | 545 | 609 | 537 | 455 | 322 |
| 413.82 | 137 | 112 | 115 | 113 | 111 | 116 | 109  | 109  | 128 | 768.86 | 353 | 518 | 525 | 637   | 545 | 602 | 536 | 455 | 321 |
| 414.19 | 137 | 112 | 113 | 113 | 111 | 117 | 110  | 109  | 127 | 769.19 | 350 | 515 | 516 | 635   | 543 | 599 | 530 | 455 | 321 |
| 414.56 | 140 | 113 | 113 | 115 | 113 | 117 | 111  | 112  | 128 | 769.51 | 352 | 515 | 511 | 633   | 533 | 594 | 525 | 450 | 318 |
| 414.92 | 139 | 112 | 111 | 113 | 110 | 114 | 109  | 110  | 126 | 769.84 | 350 | 515 | 508 | 631   | 528 | 594 | 522 | 449 | 318 |
| 415.29 | 139 | 111 | 109 | 112 | 108 | 112 | 109  | 109  | 124 | 770.16 | 350 | 515 | 511 | 625   | 529 | 594 | 525 | 448 | 316 |
| 415.65 | 137 | 109 | 109 | 112 | 108 | 112 | 108  | 106  | 125 | 770.49 | 344 | 511 | 504 | 620   | 523 | 585 | 524 | 449 | 314 |
| 416.02 | 138 | 110 | 113 | 113 | 111 | 114 | 109  | 105  | 129 | 770.81 | 352 | 509 | 512 | 622   | 527 | 586 | 524 | 449 | 318 |
| 416.39 | 139 | 111 | 116 | 114 | 112 | 116 | 107  | 105  | 131 | 771.14 | 352 | 511 | 516 | 626   | 525 | 587 | 526 | 452 | 325 |
| 416.75 | 138 | 111 | 115 | 114 | 109 | 115 | 106  | 105  | 129 | 771.46 | 355 | 510 | 517 | 622   | 529 | 594 | 521 | 451 | 322 |
| 417.12 | 136 | 110 | 113 | 114 | 109 | 115 | 106  | 107  | 127 | 771.79 | 342 | 504 | 507 | 616   | 523 | 585 | 514 | 444 | 314 |
| 417.48 | 132 | 107 | 110 | 111 | 107 | 112 | 105  | 106  | 123 | 772.11 | 338 | 499 | 502 | 612   | 519 | 578 | 513 | 438 | 307 |
| 417.85 | 133 | 106 | 110 | 110 | 107 | 110 | 105  | 104  | 124 | 772.44 | 336 | 491 | 505 | 609   | 515 | 573 | 515 | 436 | 310 |
| 418.22 | 134 | 106 | 110 | 109 | 106 | 110 | 104  | 104  | 124 | 772.76 | 338 | 493 | 503 | 608   | 518 | 574 | 516 | 439 | 312 |
| 418.58 | 136 | 108 | 112 | 112 | 108 | 113 | 107  | 106  | 126 | 773.09 | 339 | 494 | 501 | 601   | 517 | 575 | 510 | 444 | 308 |
| 418.95 | 135 | 108 | 111 | 111 | 109 | 112 | 106  | 105  | 125 | 773.41 | 336 | 495 | 501 | 603   | 516 | 571 | 508 | 444 | 308 |
| 419.31 | 135 | 106 | 109 | 107 | 107 | 109 | 104  | 98.7 | 123 | 773.74 | 334 | 494 | 498 | 602   | 510 | 569 | 503 | 443 | 303 |
| 419.68 | 137 | 105 | 109 | 105 | 106 | 108 | 104  | 96.3 | 124 | 774.06 | 332 | 489 | 492 | 599   | 507 | 559 | 503 | 433 | 303 |
| 420.04 | 138 | 105 | 111 | 107 | 107 | 110 | 107  | 98.7 | 127 | 774.39 | 331 | 483 | 484 | 595   | 502 | 555 | 499 | 432 | 300 |
| 420.41 | 139 | 105 | 110 | 108 | 108 | 111 | 108  | 101  | 129 | 774.71 | 335 | 480 | 483 | 594   | 502 | 552 | 503 | 430 | 306 |
| 420.77 | 135 | 101 | 106 | 106 | 105 | 111 | 105  | 99   | 127 | 775.04 | 337 | 480 | 487 | 600   | 499 | 559 | 500 | 433 | 307 |
| 421.14 | 135 | 102 | 107 | 107 | 106 | 113 | 106  | 98.3 | 128 | 775.36 | 334 | 481 | 483 | 594   | 498 | 558 | 495 | 428 | 305 |
| 421.51 | 135 | 103 | 107 | 107 | 104 | 113 | 105  | 99.7 | 130 | 775.69 | 329 | 480 | 484 | 591   | 494 | 554 | 487 | 427 | 300 |
| 421.87 | 139 | 107 | 110 | 108 | 107 | 113 | 107  | 105  | 133 | 776.01 | 331 | 480 | 484 | 587   | 502 | 549 | 486 | 427 | 302 |
| 422.24 | 141 | 107 | 110 | 108 | 106 | 112 | 104  | 106  | 131 | 776.34 | 337 | 484 | 490 | 591   | 503 | 555 | 491 | 434 | 304 |
| 422.6  | 141 | 107 | 112 | 108 | 107 | 112 | 107  | 107  | 130 | 776.66 | 340 | 479 | 490 | 591   | 501 | 558 | 494 | 438 | 305 |
| 422.97 | 140 | 105 | 111 | 106 | 106 | 112 | 107  | 105  | 129 | 776.98 | 333 | 470 | 483 | 586   | 494 | 553 | 491 | 434 | 300 |
| 423.33 | 140 | 103 | 109 | 103 | 104 | 109 | 106  | 104  | 130 | 777.31 | 328 | 465 | 477 | 578   | 491 | 542 | 486 | 421 | 296 |
| 423.7  | 142 | 103 | 108 | 104 | 105 | 110 | 105  | 105  | 131 | 777.63 | 327 | 465 | 475 | 573   | 492 | 538 | 482 | 412 | 295 |
| 424.06 | 142 | 103 | 107 | 106 | 105 | 108 | 105  | 104  | 130 | 777.96 | 328 | 467 | 475 | 577   | 486 | 539 | 482 | 412 | 295 |
| 424.43 | 141 | 103 | 108 | 107 | 104 | 109 | 104  | 104  | 129 | 778.28 | 327 | 466 | 475 | 579   | 485 | 538 | 478 | 419 | 294 |
| 424.79 | 136 | 100 | 105 | 103 | 101 | 106 | 100  | 100  | 125 | 778.61 | 325 | 462 | 468 | 577   | 482 | 535 | 477 | 416 | 292 |
| 425.16 | 134 | 102 | 104 | 103 | 100 | 107 | 99.7 | 99.3 | 129 | 778.93 | 323 | 463 | 467 | 568   | 485 | 528 | 474 | 412 | 288 |
| 425.52 | 135 | 104 | 104 | 105 | 102 | 109 | 99.7 | 99.3 | 132 | 779.25 | 321 | 463 | 467 | 564   | 483 | 530 | 475 | 405 | 291 |
| 425.89 | 140 | 106 | 108 | 108 | 104 | 113 | 102  | 102  | 139 | 779.58 | 323 | 464 | 472 | 568   | 483 | 529 | 476 | 408 | 292 |
| 426.25 | 144 | 106 | 110 | 109 | 106 | 116 | 104  | 105  | 138 | 779.9  | 324 | 464 | 473 | 567   | 480 | 530 | 475 | 413 | 297 |
| 426.62 | 145 | 104 | 110 | 107 | 106 | 116 | 104  | 105  | 137 | 780.22 | 322 | 461 | 469 | 565   | 475 | 524 | 468 | 409 | 293 |
| 426.98 | 144 | 101 | 108 | 105 | 104 | 112 | 105  | 104  | 136 | 780.55 | 316 | 458 | 469 | 559</ |     |     |     |     |     |

|        |     |      |     |     |      |     |      |      |     |        |     |     |     |     |     |     |     |     |     |
|--------|-----|------|-----|-----|------|-----|------|------|-----|--------|-----|-----|-----|-----|-----|-----|-----|-----|-----|
| 430.63 | 151 | 104  | 109 | 105 | 105  | 113 | 101  | 99.7 | 136 | 783.78 | 313 | 443 | 449 | 539 | 467 | 510 | 462 | 398 | 288 |
| 430.99 | 151 | 103  | 107 | 104 | 103  | 113 | 98.3 | 97.7 | 135 | 784.11 | 313 | 437 | 445 | 535 | 464 | 505 | 454 | 400 | 286 |
| 431.36 | 145 | 99.3 | 103 | 103 | 98.7 | 111 | 94.3 | 95.3 | 132 | 784.43 | 310 | 436 | 443 | 531 | 459 | 501 | 446 | 395 | 284 |
| 431.72 | 146 | 100  | 104 | 105 | 97.7 | 110 | 94   | 95.3 | 133 | 784.75 | 306 | 434 | 440 | 529 | 450 | 497 | 442 | 391 | 280 |
| 432.09 | 149 | 101  | 107 | 107 | 98   | 112 | 95.3 | 95.3 | 135 | 785.08 | 306 | 434 | 443 | 525 | 447 | 499 | 443 | 391 | 282 |
| 432.45 | 152 | 102  | 109 | 108 | 99.7 | 114 | 98.3 | 95.3 | 138 | 785.4  | 302 | 434 | 440 | 523 | 449 | 496 | 444 | 390 | 279 |
| 432.82 | 150 | 100  | 109 | 107 | 101  | 116 | 101  | 95.3 | 136 | 785.72 | 301 | 438 | 441 | 522 | 452 | 500 | 446 | 389 | 276 |
| 433.18 | 150 | 101  | 112 | 109 | 105  | 120 | 104  | 99.7 | 138 | 786.05 | 299 | 439 | 438 | 521 | 449 | 492 | 444 | 386 | 273 |
| 433.55 | 152 | 101  | 113 | 109 | 106  | 120 | 104  | 102  | 137 | 786.37 | 299 | 434 | 435 | 519 | 444 | 487 | 445 | 384 | 271 |
| 433.91 | 155 | 100  | 112 | 109 | 103  | 119 | 103  | 102  | 139 | 786.69 | 303 | 432 | 434 | 519 | 444 | 492 | 452 | 389 | 279 |
| 434.27 | 153 | 99.3 | 110 | 107 | 98.7 | 114 | 99   | 97.3 | 136 | 787.01 | 303 | 431 | 432 | 521 | 441 | 493 | 450 | 388 | 283 |
| 434.64 | 152 | 102  | 109 | 108 | 98   | 114 | 98.7 | 95   | 137 | 787.34 | 302 | 434 | 435 | 521 | 441 | 499 | 447 | 391 | 286 |
| 435    | 152 | 104  | 112 | 109 | 102  | 115 | 98   | 95.3 | 137 | 787.66 | 300 | 428 | 428 | 516 | 436 | 494 | 439 | 381 | 281 |
| 435.37 | 154 | 106  | 115 | 113 | 105  | 118 | 99   | 98   | 140 | 787.98 | 297 | 423 | 426 | 515 | 435 | 491 | 442 | 375 | 277 |
| 435.73 | 157 | 105  | 118 | 113 | 106  | 120 | 101  | 102  | 141 | 788.3  | 302 | 421 | 426 | 515 | 437 | 493 | 439 | 376 | 277 |
| 436.09 | 157 | 102  | 116 | 112 | 100  | 119 | 99.3 | 102  | 141 | 788.63 | 306 | 427 | 433 | 519 | 444 | 494 | 444 | 382 | 281 |
| 436.46 | 159 | 101  | 116 | 111 | 99.7 | 120 | 101  | 103  | 142 | 788.95 | 307 | 433 | 439 | 520 | 446 | 497 | 439 | 388 | 282 |
| 436.82 | 159 | 102  | 115 | 110 | 98.3 | 120 | 98   | 100  | 142 | 789.27 | 305 | 439 | 438 | 520 | 449 | 494 | 442 | 384 | 285 |
| 437.19 | 164 | 108  | 118 | 116 | 104  | 124 | 102  | 103  | 147 | 789.59 | 303 | 433 | 434 | 513 | 449 | 487 | 434 | 377 | 277 |
| 437.55 | 166 | 110  | 118 | 117 | 105  | 124 | 104  | 105  | 148 | 789.92 | 302 | 431 | 429 | 509 | 450 | 487 | 434 | 377 | 275 |
| 437.91 | 168 | 108  | 118 | 119 | 107  | 122 | 105  | 107  | 149 | 790.24 | 302 | 428 | 432 | 506 | 445 | 485 | 434 | 380 | 274 |
| 438.28 | 167 | 109  | 121 | 120 | 108  | 123 | 106  | 109  | 152 | 790.56 | 301 | 434 | 435 | 514 | 443 | 490 | 439 | 385 | 278 |
| 438.64 | 163 | 105  | 120 | 117 | 105  | 124 | 102  | 104  | 148 | 790.88 | 301 | 430 | 437 | 511 | 441 | 484 | 439 | 384 | 283 |
| 439.01 | 160 | 103  | 118 | 115 | 105  | 125 | 100  | 99.7 | 146 | 791.21 | 302 | 428 | 437 | 517 | 441 | 485 | 443 | 386 | 281 |
| 439.37 | 162 | 102  | 115 | 113 | 106  | 125 | 101  | 96.7 | 145 | 791.53 | 301 | 421 | 433 | 510 | 437 | 478 | 441 | 383 | 279 |
| 439.73 | 165 | 106  | 117 | 114 | 110  | 125 | 104  | 98   | 149 | 791.85 | 302 | 428 | 431 | 517 | 435 | 486 | 445 | 383 | 279 |
| 440.1  | 165 | 105  | 117 | 112 | 109  | 124 | 101  | 98.7 | 148 | 792.17 | 302 | 428 | 429 | 512 | 435 | 480 | 440 | 381 | 276 |
| 440.46 | 165 | 100  | 118 | 111 | 104  | 122 | 96.7 | 96.7 | 145 | 792.49 | 302 | 431 | 428 | 517 | 441 | 484 | 443 | 384 | 278 |
| 440.83 | 164 | 97.7 | 118 | 111 | 102  | 119 | 94.3 | 96.3 | 141 | 792.82 | 303 | 431 | 426 | 518 | 443 | 483 | 441 | 385 | 274 |
| 441.19 | 168 | 102  | 121 | 116 | 105  | 123 | 99   | 99.7 | 146 | 793.14 | 301 | 434 | 423 | 514 | 442 | 489 | 440 | 386 | 276 |
| 441.55 | 169 | 104  | 122 | 119 | 108  | 121 | 101  | 100  | 147 | 793.46 | 299 | 429 | 426 | 512 | 437 | 484 | 434 | 384 | 272 |
| 441.92 | 168 | 104  | 123 | 119 | 109  | 123 | 101  | 101  | 148 | 793.78 | 300 | 422 | 426 | 509 | 434 | 477 | 429 | 376 | 271 |
| 442.28 | 168 | 101  | 120 | 115 | 106  | 122 | 98.7 | 98.3 | 147 | 794.1  | 301 | 419 | 423 | 507 | 435 | 472 | 429 | 368 | 270 |
| 442.64 | 173 | 103  | 121 | 119 | 108  | 127 | 103  | 102  | 149 | 794.43 | 302 | 422 | 419 | 506 | 432 | 473 | 430 | 369 | 271 |
| 443.01 | 174 | 106  | 127 | 123 | 108  | 132 | 108  | 104  | 153 | 794.75 | 299 | 421 | 413 | 508 | 433 | 472 | 431 | 371 | 270 |
| 443.37 | 177 | 112  | 131 | 128 | 114  | 135 | 112  | 109  | 154 | 795.07 | 294 | 418 | 412 | 508 | 425 | 471 | 429 | 372 | 268 |
| 443.73 | 173 | 113  | 130 | 126 | 115  | 133 | 110  | 107  | 154 | 795.39 | 290 | 415 | 412 | 503 | 424 | 473 | 428 | 370 | 267 |
| 444.1  | 178 | 112  | 128 | 126 | 116  | 132 | 108  | 108  | 153 | 795.71 | 291 | 415 | 417 | 498 | 423 | 479 | 435 | 373 | 270 |
| 444.46 | 176 | 112  | 130 | 128 | 116  | 132 | 106  | 105  | 153 | 796.03 | 291 | 418 | 422 | 499 | 428 | 480 | 434 | 373 | 269 |
| 444.82 | 177 | 110  | 130 | 130 | 115  | 133 | 106  | 105  | 153 | 796.36 | 297 | 418 | 423 | 502 | 430 | 481 | 433 | 375 | 269 |
| 445.19 | 180 | 113  | 134 | 136 | 120  | 135 | 110  | 109  | 158 | 796.68 | 302 | 416 | 422 | 509 | 429 | 477 | 430 | 375 | 264 |
| 445.55 | 186 | 114  | 139 | 137 | 120  | 138 | 115  | 112  | 161 | 797    | 303 | 415 | 422 | 509 | 433 | 475 | 429 | 377 | 265 |
| 445.91 | 189 | 117  | 144 | 139 | 122  | 143 | 119  | 116  | 163 | 797.32 | 300 | 418 | 420 | 507 | 433 | 470 | 423 | 372 | 267 |
| 446.28 | 187 | 115  | 142 | 136 | 119  | 142 | 117  | 112  | 158 | 797.64 | 293 | 418 | 421 | 494 | 429 | 465 | 417 | 369 | 266 |
| 446.64 | 186 | 114  | 142 | 137 | 120  | 142 | 118  | 110  | 158 | 797.96 | 294 | 420 | 418 | 495 | 427 | 469 | 421 | 366 | 267 |
| 447    | 185 | 112  | 140 | 134 | 118  | 140 | 113  | 105  | 156 | 798.28 | 292 | 416 | 417 | 491 | 427 | 467 | 426 | 367 | 264 |
| 447.37 | 184 | 110  | 141 | 131 | 118  | 141 | 111  | 103  | 159 | 798.6  | 296 | 416 | 412 | 498 | 430 | 473 | 429 | 369 | 267 |
| 447.73 | 185 | 110  | 139 | 132 | 117  | 141 | 109  | 104  | 162 | 798.92 | 292 | 410 | 409 | 491 | 427 | 464 | 420 | 367 | 265 |
| 448.09 | 185 | 107  | 138 | 130 | 116  | 142 | 110  | 104  | 163 | 799.25 | 290 | 409 | 408 | 494 | 421 | 462 | 416 | 368 | 263 |
| 448.45 | 188 | 108  | 135 | 133 | 114  | 138 | 111  | 105  | 163 | 799.57 | 286 | 409 | 409 | 490 | 422 | 459 | 410 | 363 | 263 |
| 448.82 | 188 | 109  | 133 | 131 | 116  | 140 | 111  | 104  | 163 | 799.89 | 287 | 407 | 407 | 492 | 423 | 461 | 412 | 361 | 262 |
| 449.18 | 190 | 112  | 133 | 132 | 116  | 138 | 110  | 104  | 161 | 800.21 | 288 | 400 | 404 | 485 | 425 | 461 | 408 | 359 | 262 |
| 449.54 | 194 | 114  | 135 | 136 | 118  | 142 | 109  | 105  | 160 | 800.53 | 291 | 400 | 400 | 483 | 420 | 463 | 412 | 364 | 263 |
| 449.91 | 197 | 112  | 137 | 137 | 117  | 141 | 108  | 107  | 159 | 800.85 | 298 | 409 | 406 | 491 | 424 | 469 | 418 | 371 | 267 |
| 450.27 | 198 | 111  | 141 | 141 | 119  | 145 | 110  | 109  | 160 | 801.17 | 300 | 418 | 410 | 496 | 426 | 475 | 423 | 372 | 271 |
| 450.63 | 197 | 114  | 146 | 142 | 125  | 146 | 113  | 115  | 162 | 801.49 | 300 | 419 | 413 | 501 | 432 | 476 | 428 | 375 | 274 |
| 450.99 | 196 | 116  | 150 | 145 | 127  | 148 | 115  | 116  | 163 | 801.81 | 293 | 416 | 411 | 491 | 422 | 473 | 427 | 368 | 271 |
| 451.36 | 195 | 119  | 149 | 146 | 129  | 152 | 118  | 118  | 167 | 802.13 | 291 | 418 | 408 | 489 | 419 | 461 | 426 | 369 | 270 |
| 451.72 | 198 | 117  | 149 | 147 | 128  | 155 | 117  | 114  | 169 | 802.45 | 290 | 416 | 408 | 485 | 418 | 457 | 418 | 361 | 267 |
| 452.08 | 196 | 117  | 149 | 147 | 130  | 158 | 117  | 113  | 172 | 802.77 | 291 | 415 | 407 | 485 | 423 | 458 | 416 | 361 | 268 |
| 452.44 | 199 | 121  | 152 | 149 | 132  | 158 | 120  | 114  | 175 | 803.09 | 289 | 409 | 406 | 485 | 424 | 463 | 411 | 358 | 267 |
| 452.81 | 197 | 122  | 152 | 147 | 132  | 156 | 119  | 115  | 174 | 803.41 | 286 | 404 | 406 | 487 | 418 | 463 | 406 | 357 | 264 |
| 453.17 | 199 | 124  | 154 | 152 | 132  | 154 | 122  | 116  | 171 | 803.73 | 286 | 398 | 399 | 488 | 418 | 457 | 404 | 357 | 264 |
| 453.53 | 198 | 124  | 156 | 156 | 136  | 156 | 126  | 119  | 171 | 804.05 | 286 | 399 | 400 | 487 | 417 | 457 | 408 | 356 | 263 |
| 453.89 | 200 | 128  | 155 | 160 | 137  | 158 | 130  | 119  | 173 | 804.37 | 289 | 404 | 401 | 486 | 420 | 456 | 415 | 360 | 266 |
| 454.26 | 201 | 129  | 154 | 158 | 138  | 159 | 130  | 118  | 172 | 804.7  | 288 | 406 | 403 | 486 | 414 | 453 | 410 | 360 | 262 |
| 454.62 | 203 | 128  | 157 | 156 | 137  | 159 | 126  | 115  | 171 | 805.02 | 288 | 406 | 403 | 486 | 414 | 449 | 409 | 359 | 261 |
| 454.98 | 206 | 127  | 161 | 159 | 139  | 162 | 126  | 119  | 171 | 805.34 | 287 | 399 | 400 | 485 | 409 | 445 | 406 | 355 | 260 |
| 455.34 | 207 | 129  | 163 | 161 | 140  | 163 | 125  | 122  | 172 | 805.66 | 289 | 399 | 403 | 485 | 410 | 448 | 408 | 353 | 262 |
| 455.71 | 211 | 132  | 166 | 166 | 144  | 167 | 130  | 128  | 178 | 805.98 | 291 | 400 | 400 | 480 | 411 | 447 | 405 | 356 | 265 |
| 456.07 | 207 | 131  | 164 | 164 | 144  | 168 | 130  | 126  | 178 | 806.3  | 289 | 403 | 402 | 480 | 415 | 448 | 403 | 358 | 264 |
| 456.43 | 207 | 132  | 163 | 164 | 145  | 172 | 132  | 128  | 181 | 806.61 | 284 | 396 | 398 | 473 | 415 | 441 | 400 | 354 | 260 |
| 456.79 | 206 | 134  | 161 | 166 | 142  | 173 | 133  | 127  | 179 | 806.93 | 283 | 398 |     |     |     |     |     |     |     |

|        |     |     |     |     |     |     |     |     |     |        |     |     |     |     |     |     |     |     |     |
|--------|-----|-----|-----|-----|-----|-----|-----|-----|-----|--------|-----|-----|-----|-----|-----|-----|-----|-----|-----|
| 460.41 | 218 | 136 | 175 | 176 | 153 | 181 | 143 | 131 | 184 | 810.13 | 280 | 386 | 390 | 468 | 401 | 439 | 397 | 346 | 254 |
| 460.78 | 223 | 139 | 173 | 179 | 156 | 184 | 147 | 130 | 187 | 810.45 | 283 | 384 | 392 | 466 | 402 | 439 | 394 | 348 | 255 |
| 461.14 | 223 | 140 | 175 | 185 | 156 | 189 | 146 | 131 | 191 | 810.77 | 279 | 388 | 387 | 464 | 397 | 433 | 393 | 347 | 255 |
| 461.5  | 223 | 139 | 176 | 185 | 158 | 192 | 147 | 133 | 187 | 811.09 | 280 | 393 | 388 | 469 | 397 | 434 | 394 | 350 | 258 |
| 461.86 | 223 | 139 | 179 | 180 | 154 | 189 | 146 | 134 | 185 | 811.41 | 275 | 394 | 384 | 470 | 397 | 434 | 393 | 344 | 255 |
| 462.22 | 225 | 143 | 187 | 183 | 160 | 190 | 146 | 136 | 186 | 811.73 | 277 | 390 | 386 | 469 | 397 | 434 | 390 | 343 | 253 |
| 462.58 | 232 | 145 | 191 | 187 | 163 | 191 | 146 | 136 | 195 | 812.05 | 272 | 385 | 383 | 462 | 392 | 431 | 388 | 335 | 249 |
| 462.95 | 230 | 147 | 193 | 192 | 168 | 196 | 149 | 139 | 193 | 812.36 | 276 | 384 | 382 | 462 | 388 | 432 | 389 | 339 | 254 |
| 463.31 | 232 | 148 | 191 | 193 | 168 | 195 | 154 | 141 | 194 | 812.68 | 271 | 386 | 377 | 460 | 389 | 431 | 391 | 340 | 256 |
| 463.67 | 231 | 152 | 195 | 199 | 172 | 199 | 159 | 147 | 197 | 813    | 276 | 389 | 379 | 458 | 393 | 430 | 388 | 345 | 259 |
| 464.03 | 231 | 152 | 197 | 200 | 175 | 202 | 164 | 147 | 201 | 813.32 | 275 | 383 | 378 | 455 | 391 | 424 | 388 | 341 | 252 |
| 464.39 | 232 | 151 | 199 | 199 | 171 | 203 | 159 | 148 | 200 | 813.64 | 278 | 379 | 379 | 456 | 387 | 423 | 384 | 339 | 249 |
| 464.75 | 230 | 151 | 199 | 199 | 172 | 206 | 160 | 149 | 202 | 813.96 | 275 | 376 | 380 | 457 | 386 | 422 | 388 | 338 | 247 |
| 465.11 | 233 | 156 | 205 | 206 | 181 | 209 | 162 | 156 | 207 | 814.28 | 277 | 380 | 381 | 458 | 385 | 425 | 387 | 339 | 255 |
| 465.48 | 233 | 156 | 207 | 205 | 184 | 208 | 167 | 155 | 208 | 814.6  | 276 | 386 | 381 | 453 | 382 | 429 | 392 | 338 | 258 |
| 465.84 | 238 | 156 | 204 | 208 | 183 | 208 | 167 | 151 | 207 | 814.91 | 277 | 385 | 380 | 448 | 382 | 433 | 385 | 339 | 256 |
| 466.2  | 238 | 155 | 201 | 206 | 175 | 208 | 163 | 146 | 204 | 815.23 | 276 | 384 | 378 | 446 | 387 | 430 | 385 | 339 | 253 |
| 466.56 | 240 | 157 | 203 | 217 | 182 | 217 | 163 | 152 | 205 | 815.55 | 274 | 381 | 378 | 445 | 393 | 425 | 380 | 341 | 248 |
| 466.92 | 238 | 158 | 209 | 216 | 182 | 217 | 159 | 155 | 203 | 815.87 | 272 | 380 | 372 | 445 | 390 | 421 | 383 | 342 | 254 |
| 467.28 | 241 | 160 | 211 | 217 | 187 | 221 | 166 | 160 | 204 | 816.19 | 272 | 379 | 376 | 445 | 387 | 423 | 384 | 341 | 249 |
| 467.64 | 241 | 160 | 209 | 216 | 183 | 218 | 164 | 159 | 201 | 816.51 | 271 | 372 | 371 | 444 | 382 | 421 | 379 | 337 | 249 |
| 468    | 242 | 159 | 208 | 219 | 186 | 217 | 167 | 162 | 203 | 816.82 | 270 | 371 | 372 | 445 | 382 | 418 | 375 | 335 | 246 |
| 468.37 | 244 | 166 | 213 | 225 | 190 | 221 | 169 | 163 | 206 | 817.14 | 268 | 370 | 368 | 439 | 378 | 415 | 372 | 331 | 244 |
| 468.73 | 246 | 168 | 216 | 226 | 195 | 227 | 173 | 167 | 210 | 817.46 | 267 | 369 | 369 | 440 | 379 | 415 | 374 | 333 | 245 |
| 469.09 | 249 | 174 | 219 | 230 | 198 | 231 | 174 | 166 | 214 | 817.78 | 268 | 366 | 370 | 435 | 376 | 415 | 375 | 333 | 244 |
| 469.45 | 249 | 169 | 218 | 229 | 196 | 229 | 168 | 161 | 208 | 818.1  | 267 | 368 | 371 | 440 | 379 | 414 | 382 | 340 | 249 |
| 469.81 | 253 | 170 | 220 | 229 | 198 | 230 | 171 | 163 | 212 | 818.42 | 271 | 374 | 374 | 443 | 381 | 420 | 385 | 340 | 248 |
| 470.17 | 254 | 176 | 223 | 230 | 199 | 236 | 177 | 163 | 209 | 818.73 | 270 | 377 | 378 | 446 | 382 | 424 | 387 | 338 | 248 |
| 470.53 | 257 | 179 | 223 | 235 | 198 | 242 | 184 | 168 | 217 | 819.05 | 268 | 371 | 371 | 444 | 379 | 424 | 379 | 331 | 244 |
| 470.89 | 258 | 179 | 223 | 236 | 199 | 245 | 185 | 165 | 220 | 819.37 | 267 | 366 | 371 | 439 | 379 | 419 | 378 | 329 | 247 |
| 471.25 | 261 | 176 | 222 | 241 | 200 | 251 | 186 | 170 | 224 | 819.69 | 271 | 364 | 369 | 435 | 381 | 415 | 377 | 329 | 252 |
| 471.61 | 261 | 174 | 222 | 244 | 202 | 248 | 184 | 168 | 220 | 820    | 274 | 367 | 370 | 430 | 382 | 416 | 379 | 331 | 254 |
| 471.97 | 266 | 173 | 225 | 252 | 205 | 246 | 180 | 170 | 218 | 820.32 | 274 | 371 | 366 | 428 | 381 | 415 | 376 | 329 | 251 |
| 472.34 | 265 | 172 | 227 | 248 | 209 | 245 | 180 | 170 | 219 | 820.64 | 269 | 374 | 361 | 433 | 378 | 412 | 378 | 326 | 245 |
| 472.7  | 266 | 177 | 232 | 246 | 213 | 250 | 183 | 170 | 223 | 820.96 | 265 | 376 | 362 | 438 | 377 | 409 | 371 | 323 | 245 |
| 473.06 | 262 | 181 | 237 | 244 | 213 | 255 | 191 | 174 | 224 | 821.28 | 264 | 373 | 359 | 437 | 374 | 406 | 367 | 325 | 247 |
| 473.42 | 264 | 188 | 240 | 246 | 214 | 255 | 195 | 175 | 226 | 821.59 | 264 | 370 | 357 | 429 | 369 | 407 | 361 | 324 | 247 |
| 473.78 | 262 | 187 | 240 | 251 | 216 | 259 | 197 | 178 | 224 | 821.91 | 263 | 370 | 350 | 423 | 367 | 403 | 365 | 322 | 244 |
| 474.14 | 267 | 188 | 242 | 257 | 219 | 263 | 197 | 180 | 229 | 822.23 | 265 | 367 | 352 | 423 | 369 | 407 | 370 | 322 | 244 |
| 474.5  | 268 | 188 | 245 | 263 | 221 | 266 | 197 | 183 | 231 | 822.55 | 265 | 363 | 352 | 424 | 370 | 408 | 373 | 326 | 248 |
| 474.86 | 272 | 193 | 251 | 267 | 221 | 271 | 202 | 187 | 237 | 822.86 | 267 | 358 | 360 | 427 | 370 | 417 | 374 | 332 | 251 |
| 475.22 | 271 | 192 | 250 | 271 | 222 | 271 | 207 | 185 | 231 | 823.18 | 260 | 357 | 356 | 426 | 362 | 410 | 370 | 330 | 249 |
| 475.58 | 276 | 192 | 248 | 272 | 227 | 276 | 207 | 187 | 231 | 823.5  | 262 | 362 | 357 | 428 | 365 | 406 | 368 | 328 | 244 |
| 475.94 | 282 | 193 | 249 | 273 | 235 | 275 | 210 | 188 | 234 | 823.81 | 264 | 365 | 358 | 426 | 363 | 401 | 368 | 325 | 243 |
| 476.3  | 287 | 196 | 251 | 274 | 234 | 279 | 210 | 185 | 239 | 824.13 | 264 | 362 | 360 | 425 | 363 | 400 | 366 | 322 | 242 |
| 476.66 | 286 | 201 | 260 | 275 | 232 | 280 | 212 | 183 | 239 | 824.45 | 259 | 355 | 358 | 422 | 357 | 397 | 360 | 321 | 242 |
| 477.02 | 283 | 200 | 257 | 279 | 227 | 282 | 206 | 184 | 240 | 824.77 | 253 | 346 | 346 | 418 | 353 | 390 | 354 | 315 | 239 |
| 477.38 | 287 | 205 | 265 | 287 | 234 | 288 | 210 | 193 | 248 | 825.08 | 257 | 350 | 342 | 421 | 358 | 393 | 348 | 315 | 242 |
| 477.74 | 295 | 204 | 263 | 292 | 236 | 285 | 213 | 198 | 250 | 825.4  | 258 | 351 | 345 | 418 | 355 | 395 | 349 | 311 | 239 |
| 478.1  | 298 | 207 | 269 | 294 | 240 | 290 | 223 | 198 | 246 | 825.72 | 262 | 354 | 348 | 415 | 353 | 398 | 353 | 311 | 237 |
| 478.46 | 297 | 204 | 267 | 290 | 239 | 287 | 222 | 197 | 242 | 826.03 | 260 | 354 | 350 | 413 | 351 | 399 | 360 | 314 | 236 |
| 478.82 | 294 | 203 | 272 | 293 | 241 | 296 | 228 | 194 | 242 | 826.35 | 261 | 356 | 343 | 417 | 356 | 398 | 363 | 316 | 238 |
| 479.18 | 294 | 207 | 276 | 295 | 241 | 301 | 227 | 195 | 246 | 826.67 | 260 | 357 | 340 | 416 | 356 | 395 | 359 | 322 | 239 |
| 479.54 | 292 | 210 | 275 | 295 | 244 | 303 | 223 | 192 | 247 | 826.98 | 258 | 353 | 340 | 412 | 353 | 391 | 355 | 321 | 235 |
| 479.9  | 299 | 217 | 279 | 302 | 250 | 306 | 224 | 200 | 252 | 827.3  | 258 | 345 | 341 | 406 | 351 | 386 | 351 | 319 | 232 |
| 480.26 | 302 | 216 | 284 | 307 | 256 | 309 | 225 | 204 | 253 | 827.62 | 255 | 343 | 339 | 403 | 347 | 387 | 347 | 314 | 232 |
| 480.62 | 305 | 214 | 293 | 316 | 263 | 315 | 232 | 209 | 260 | 827.93 | 253 | 343 | 342 | 402 | 346 | 387 | 346 | 314 | 235 |
| 480.98 | 302 | 213 | 293 | 313 | 262 | 318 | 232 | 206 | 257 | 828.25 | 256 | 351 | 347 | 406 | 348 | 392 | 353 | 319 | 243 |
| 481.34 | 302 | 210 | 289 | 306 | 257 | 317 | 228 | 203 | 253 | 828.57 | 261 | 354 | 356 | 411 | 351 | 398 | 361 | 323 | 246 |
| 481.7  | 306 | 214 | 289 | 307 | 256 | 317 | 232 | 203 | 252 | 828.88 | 264 | 354 | 354 | 412 | 354 | 401 | 366 | 321 | 242 |
| 482.06 | 315 | 219 | 294 | 312 | 264 | 318 | 238 | 210 | 260 | 829.2  | 258 | 348 | 350 | 410 | 351 | 395 | 356 | 314 | 236 |
| 482.42 | 324 | 231 | 301 | 330 | 275 | 328 | 252 | 219 | 271 | 829.52 | 254 | 348 | 345 | 408 | 349 | 387 | 350 | 313 | 232 |
| 482.78 | 331 | 240 | 310 | 339 | 283 | 335 | 252 | 221 | 273 | 829.83 | 253 | 345 | 345 | 407 | 348 | 382 | 344 | 311 | 233 |
| 483.14 | 329 | 242 | 314 | 342 | 282 | 339 | 252 | 218 | 269 | 830.15 | 253 | 346 | 345 | 407 | 344 | 383 | 347 | 312 | 233 |
| 483.5  | 323 | 238 | 318 | 340 | 280 | 332 | 251 | 214 | 265 | 830.46 | 253 | 343 | 343 | 405 | 346 | 379 | 349 | 308 | 236 |
| 483.86 | 323 | 244 | 318 | 347 | 282 | 336 | 259 | 225 | 269 | 830.78 | 255 | 347 | 338 | 406 | 344 | 380 | 350 | 310 | 237 |
| 484.22 | 327 | 250 | 321 | 356 | 290 | 342 | 264 | 231 | 281 | 831.1  | 254 | 347 | 334 | 406 | 347 | 379 | 349 | 306 | 234 |
| 484.58 | 331 | 254 | 320 | 361 | 298 | 349 | 269 | 238 | 285 | 831.41 | 251 | 344 | 332 | 402 | 347 | 383 | 346 | 307 | 233 |
| 484.94 | 334 | 251 | 325 | 365 | 301 | 356 | 271 | 236 | 289 | 831.73 | 250 | 339 | 336 | 399 | 348 | 378 | 343 | 301 | 231 |
| 485.3  | 337 | 252 | 331 | 370 | 304 | 359 | 274 | 239 | 288 | 832.04 | 250 | 336 | 337 | 398 | 343 | 375 | 343 | 303 | 230 |
| 485.66 | 338 | 256 | 338 | 374 | 308 | 361 | 277 | 238 | 289 | 832.36 | 251 | 334 | 335 | 402 | 339 | 372 | 344 | 301 | 229 |
| 486.02 | 340 | 262 | 341 | 379 | 319 | 363 | 286 | 242 | 291 | 832.68 | 251 | 333 | 332 | 400 | 340 | 373 | 349 | 300 | 226 |
| 486.38 | 338 | 259 | 335 | 376 | 320 | 367 | 287 | 240 | 286 | 832.99 | 254 | 337 | 332 | 402 | 343 | 380 |     |     |     |

|        |     |     |     |     |     |     |     |     |     |        |     |     |     |     |     |     |     |     |     |
|--------|-----|-----|-----|-----|-----|-----|-----|-----|-----|--------|-----|-----|-----|-----|-----|-----|-----|-----|-----|
| 489.97 | 343 | 269 | 352 | 389 | 323 | 380 | 294 | 251 | 299 | 836.15 | 249 | 336 | 334 | 390 | 342 | 367 | 343 | 301 | 226 |
| 490.33 | 346 | 272 | 355 | 388 | 327 | 381 | 298 | 251 | 295 | 836.46 | 253 | 335 | 334 | 389 | 340 | 366 | 348 | 302 | 228 |
| 490.69 | 352 | 268 | 360 | 398 | 329 | 388 | 299 | 251 | 294 | 836.78 | 250 | 333 | 330 | 388 | 337 | 361 | 346 | 300 | 226 |
| 491.05 | 359 | 272 | 365 | 405 | 329 | 396 | 303 | 252 | 299 | 837.09 | 248 | 328 | 327 | 384 | 335 | 358 | 339 | 297 | 225 |
| 491.4  | 363 | 282 | 371 | 418 | 342 | 410 | 308 | 261 | 311 | 837.41 | 244 | 328 | 327 | 384 | 334 | 361 | 334 | 296 | 224 |
| 491.76 | 363 | 285 | 371 | 415 | 348 | 409 | 310 | 265 | 315 | 837.72 | 247 | 328 | 326 | 382 | 333 | 358 | 332 | 295 | 225 |
| 492.12 | 365 | 285 | 370 | 417 | 350 | 409 | 310 | 266 | 309 | 838.04 | 249 | 332 | 329 | 385 | 334 | 363 | 335 | 299 | 225 |
| 492.48 | 363 | 285 | 369 | 415 | 342 | 402 | 310 | 264 | 303 | 838.35 | 249 | 332 | 325 | 383 | 331 | 360 | 334 | 296 | 226 |
| 492.84 | 369 | 295 | 373 | 422 | 345 | 412 | 314 | 270 | 307 | 838.67 | 248 | 330 | 324 | 381 | 331 | 358 | 332 | 295 | 223 |
| 493.2  | 370 | 298 | 371 | 423 | 346 | 409 | 313 | 271 | 311 | 838.98 | 243 | 324 | 319 | 375 | 325 | 356 | 330 | 291 | 221 |
| 493.56 | 375 | 297 | 377 | 425 | 354 | 415 | 319 | 274 | 317 | 839.3  | 245 | 324 | 323 | 373 | 325 | 358 | 331 | 293 | 223 |
| 493.92 | 377 | 292 | 375 | 425 | 352 | 410 | 321 | 273 | 318 | 839.61 | 242 | 326 | 326 | 375 | 327 | 363 | 331 | 294 | 228 |
| 494.27 | 375 | 291 | 378 | 420 | 355 | 417 | 321 | 275 | 319 | 839.93 | 246 | 327 | 326 | 376 | 328 | 364 | 332 | 293 | 226 |
| 494.63 | 372 | 292 | 382 | 424 | 351 | 413 | 321 | 276 | 318 | 840.24 | 247 | 323 | 325 | 374 | 328 | 362 | 332 | 288 | 223 |
| 494.99 | 371 | 295 | 386 | 425 | 356 | 423 | 324 | 275 | 314 | 840.55 | 247 | 319 | 321 | 371 | 325 | 356 | 333 | 288 | 221 |
| 495.35 | 372 | 296 | 390 | 434 | 360 | 424 | 323 | 274 | 315 | 840.87 | 245 | 318 | 317 | 372 | 325 | 355 | 329 | 287 | 221 |
| 495.71 | 375 | 299 | 388 | 437 | 364 | 430 | 321 | 275 | 314 | 841.18 | 241 | 318 | 314 | 373 | 325 | 352 | 329 | 287 | 218 |
| 496.07 | 375 | 301 | 391 | 440 | 363 | 427 | 325 | 276 | 319 | 841.5  | 240 | 318 | 313 | 379 | 327 | 356 | 324 | 288 | 217 |
| 496.42 | 378 | 301 | 393 | 438 | 363 | 430 | 334 | 277 | 318 | 841.81 | 240 | 318 | 314 | 376 | 328 | 350 | 327 | 290 | 220 |
| 496.78 | 374 | 300 | 395 | 437 | 362 | 431 | 331 | 277 | 319 | 842.13 | 241 | 317 | 315 | 377 | 328 | 352 | 329 | 293 | 222 |
| 497.14 | 375 | 302 | 398 | 437 | 363 | 432 | 329 | 282 | 317 | 842.44 | 241 | 319 | 319 | 375 | 327 | 352 | 332 | 296 | 221 |
| 497.5  | 379 | 306 | 403 | 441 | 367 | 432 | 327 | 281 | 320 | 842.76 | 237 | 314 | 316 | 372 | 320 | 351 | 325 | 289 | 214 |
| 497.86 | 384 | 307 | 404 | 441 | 371 | 435 | 334 | 279 | 321 | 843.07 | 235 | 313 | 312 | 368 | 317 | 349 | 318 | 288 | 217 |
| 498.22 | 389 | 308 | 405 | 447 | 375 | 440 | 334 | 280 | 326 | 843.38 | 237 | 309 | 307 | 361 | 312 | 340 | 311 | 280 | 215 |
| 498.57 | 388 | 311 | 406 | 451 | 375 | 451 | 338 | 285 | 329 | 843.7  | 240 | 310 | 305 | 362 | 313 | 345 | 314 | 286 | 214 |
| 498.93 | 391 | 313 | 409 | 460 | 378 | 453 | 343 | 291 | 332 | 844.01 | 242 | 308 | 309 | 362 | 313 | 344 | 316 | 285 | 212 |
| 499.29 | 390 | 312 | 410 | 464 | 381 | 450 | 345 | 287 | 329 | 844.33 | 242 | 307 | 308 | 369 | 316 | 349 | 316 | 287 | 215 |
| 499.65 | 392 | 312 | 407 | 467 | 384 | 446 | 345 | 288 | 331 | 844.64 | 241 | 312 | 311 | 367 | 316 | 348 | 316 | 283 | 223 |
| 500.01 | 395 | 317 | 411 | 467 | 386 | 449 | 347 | 285 | 335 | 844.95 | 242 | 315 | 312 | 369 | 320 | 351 | 320 | 286 | 225 |
| 500.36 | 395 | 320 | 415 | 471 | 386 | 457 | 350 | 292 | 336 | 845.27 | 240 | 321 | 318 | 366 | 321 | 353 | 324 | 284 | 226 |
| 500.72 | 397 | 320 | 420 | 473 | 389 | 458 | 352 | 296 | 334 | 845.58 | 239 | 321 | 317 | 369 | 322 | 355 | 325 | 286 | 222 |
| 501.08 | 393 | 321 | 419 | 473 | 390 | 460 | 351 | 302 | 331 | 845.89 | 240 | 319 | 312 | 368 | 318 | 353 | 321 | 286 | 219 |
| 501.44 | 392 | 323 | 422 | 470 | 394 | 461 | 354 | 302 | 338 | 846.21 | 240 | 313 | 307 | 362 | 314 | 350 | 316 | 285 | 214 |
| 501.8  | 391 | 325 | 419 | 474 | 393 | 467 | 360 | 302 | 337 | 846.52 | 241 | 307 | 305 | 360 | 314 | 348 | 318 | 287 | 215 |
| 502.15 | 394 | 326 | 422 | 477 | 391 | 466 | 363 | 301 | 338 | 846.83 | 239 | 307 | 307 | 360 | 313 | 346 | 320 | 283 | 217 |
| 502.51 | 394 | 326 | 421 | 479 | 390 | 468 | 364 | 299 | 332 | 847.15 | 241 | 307 | 307 | 359 | 311 | 344 | 320 | 284 | 218 |
| 502.87 | 397 | 328 | 425 | 479 | 391 | 471 | 362 | 300 | 337 | 847.46 | 237 | 309 | 306 | 357 | 308 | 340 | 316 | 279 | 214 |
| 503.23 | 398 | 325 | 426 | 482 | 395 | 474 | 359 | 296 | 336 | 847.78 | 236 | 310 | 303 | 354 | 311 | 341 | 315 | 277 | 213 |
| 503.58 | 402 | 325 | 424 | 487 | 401 | 476 | 357 | 296 | 335 | 848.09 | 232 | 308 | 302 | 356 | 312 | 341 | 313 | 274 | 214 |
| 503.94 | 403 | 326 | 429 | 492 | 404 | 476 | 359 | 296 | 332 | 848.4  | 232 | 310 | 304 | 355 | 312 | 342 | 307 | 273 | 219 |
| 504.3  | 402 | 329 | 423 | 495 | 403 | 474 | 357 | 300 | 333 | 848.72 | 233 | 309 | 302 | 355 | 312 | 339 | 303 | 273 | 217 |
| 504.66 | 404 | 333 | 432 | 501 | 402 | 472 | 362 | 303 | 338 | 849.03 | 235 | 313 | 305 | 349 | 312 | 339 | 303 | 274 | 216 |
| 505.01 | 406 | 331 | 428 | 503 | 401 | 472 | 364 | 301 | 341 | 849.34 | 236 | 308 | 300 | 348 | 311 | 337 | 306 | 275 | 210 |
| 505.37 | 408 | 332 | 435 | 512 | 407 | 474 | 372 | 301 | 341 | 849.65 | 232 | 309 | 302 | 349 | 309 | 342 | 312 | 277 | 213 |
| 505.73 | 404 | 332 | 431 | 506 | 404 | 474 | 372 | 306 | 339 | 849.97 | 233 | 308 | 300 | 355 | 312 | 343 | 310 | 278 | 213 |
| 506.09 | 399 | 333 | 434 | 506 | 408 | 473 | 371 | 306 | 337 | 850.28 | 232 | 306 | 302 | 355 | 311 | 341 | 313 | 276 | 216 |
| 506.44 | 399 | 333 | 435 | 500 | 406 | 476 | 368 | 310 | 335 | 850.59 | 231 | 302 | 299 | 351 | 312 | 333 | 305 | 274 | 213 |
| 506.8  | 404 | 334 | 438 | 503 | 407 | 485 | 372 | 310 | 338 | 850.91 | 232 | 299 | 294 | 347 | 307 | 332 | 307 | 273 | 214 |
| 507.16 | 406 | 338 | 441 | 506 | 411 | 492 | 376 | 311 | 343 | 851.22 | 230 | 298 | 291 | 346 | 308 | 328 | 306 | 272 | 213 |
| 507.52 | 411 | 346 | 444 | 509 | 415 | 490 | 381 | 310 | 346 | 851.53 | 227 | 296 | 288 | 345 | 302 | 327 | 305 | 270 | 211 |
| 507.87 | 409 | 343 | 443 | 511 | 420 | 483 | 378 | 308 | 345 | 851.84 | 229 | 296 | 292 | 347 | 302 | 324 | 302 | 271 | 210 |
| 508.23 | 411 | 340 | 448 | 511 | 418 | 484 | 376 | 311 | 348 | 852.16 | 227 | 294 | 292 | 345 | 300 | 321 | 298 | 272 | 208 |
| 508.59 | 413 | 337 | 449 | 512 | 419 | 494 | 377 | 317 | 346 | 852.47 | 232 | 298 | 294 | 348 | 303 | 323 | 299 | 275 | 211 |
| 508.95 | 415 | 342 | 453 | 510 | 420 | 501 | 382 | 317 | 347 | 852.78 | 227 | 298 | 294 | 343 | 306 | 320 | 298 | 271 | 213 |
| 509.3  | 412 | 341 | 446 | 514 | 415 | 503 | 382 | 318 | 342 | 853.09 | 232 | 306 | 301 | 347 | 305 | 329 | 302 | 272 | 217 |
| 509.66 | 409 | 342 | 450 | 514 | 415 | 501 | 382 | 313 | 344 | 853.41 | 230 | 307 | 302 | 343 | 304 | 327 | 302 | 268 | 216 |
| 510.02 | 415 | 345 | 455 | 520 | 416 | 498 | 383 | 317 | 347 | 853.72 | 229 | 302 | 299 | 345 | 299 | 333 | 303 | 266 | 217 |
| 510.37 | 418 | 346 | 462 | 522 | 421 | 498 | 387 | 318 | 348 | 854.03 | 227 | 296 | 294 | 341 | 298 | 326 | 300 | 263 | 215 |
| 510.73 | 423 | 347 | 462 | 532 | 429 | 501 | 388 | 321 | 350 | 854.34 | 228 | 291 | 289 | 340 | 295 | 326 | 299 | 263 | 214 |
| 511.09 | 417 | 341 | 462 | 529 | 434 | 504 | 385 | 320 | 348 | 854.66 | 231 | 292 | 289 | 338 | 294 | 322 | 298 | 265 | 213 |
| 511.44 | 420 | 346 | 460 | 529 | 434 | 507 | 385 | 321 | 348 | 854.97 | 229 | 294 | 290 | 336 | 293 | 326 | 299 | 267 | 211 |
| 511.8  | 424 | 351 | 464 | 529 | 428 | 507 | 389 | 322 | 347 | 855.28 | 227 | 294 | 292 | 334 | 294 | 324 | 300 | 266 | 211 |
| 512.16 | 431 | 358 | 462 | 532 | 427 | 512 | 395 | 321 | 350 | 855.59 | 225 | 294 | 291 | 336 | 295 | 322 | 298 | 267 | 212 |
| 512.51 | 432 | 357 | 471 | 532 | 433 | 516 | 396 | 327 | 354 | 855.91 | 228 | 289 | 286 | 338 | 293 | 317 | 297 | 264 | 215 |
| 512.87 | 425 | 357 | 470 | 529 | 433 | 515 | 392 | 326 | 359 | 856.22 | 226 | 287 | 286 | 338 | 293 | 315 | 299 | 266 | 214 |
| 513.23 | 425 | 356 | 470 | 535 | 431 | 515 | 390 | 328 | 354 | 856.53 | 223 | 284 | 283 | 330 | 290 | 313 | 300 | 259 | 210 |
| 513.58 | 423 | 354 | 465 | 538 | 425 | 515 | 391 | 326 | 352 | 856.84 | 221 | 286 | 283 | 328 | 289 | 313 | 298 | 261 | 207 |
| 513.94 | 428 | 351 | 469 | 542 | 429 | 521 | 392 | 332 | 359 | 857.15 | 218 | 283 | 281 | 322 | 286 | 308 | 290 | 257 | 207 |
| 514.3  | 428 | 353 | 473 | 541 | 430 | 516 | 390 | 325 | 360 | 857.46 | 220 | 284 | 282 | 325 | 283 | 310 | 287 | 261 | 208 |
| 514.65 | 435 | 361 | 483 | 545 | 439 | 517 | 393 | 324 | 364 | 857.78 | 221 | 283 | 283 | 328 | 286 | 310 | 287 | 256 | 207 |
| 515.01 | 437 | 370 | 483 | 549 | 446 | 514 | 396 | 319 | 358 | 858.09 | 224 | 280 | 282 | 329 | 283 | 314 | 285 | 259 | 204 |
| 515.37 | 440 | 375 | 488 | 555 | 449 | 530 | 407 | 330 | 368 | 858.4  | 224 | 282 | 277 | 332 | 287 | 313 | 286 | 257 | 205 |
| 515.72 | 443 | 371 | 488 | 555 | 450 | 533 | 410 | 332 | 371 | 858.71 | 221 | 283 | 276 | 330 | 28  |     |     |     |     |

|        |     |     |     |     |     |     |     |     |     |        |     |     |     |     |     |     |     |     |     |
|--------|-----|-----|-----|-----|-----|-----|-----|-----|-----|--------|-----|-----|-----|-----|-----|-----|-----|-----|-----|
| 519.29 | 438 | 350 | 468 | 531 | 431 | 517 | 384 | 320 | 366 | 861.82 | 216 | 274 | 276 | 318 | 280 | 304 | 275 | 250 | 203 |
| 519.64 | 445 | 344 | 466 | 527 | 427 | 517 | 385 | 320 | 365 | 862.14 | 213 | 269 | 269 | 311 | 275 | 299 | 273 | 248 | 201 |
| 520    | 447 | 343 | 470 | 531 | 426 | 511 | 384 | 321 | 366 | 862.45 | 215 | 268 | 266 | 313 | 271 | 295 | 273 | 247 | 200 |
| 520.35 | 452 | 349 | 474 | 526 | 424 | 511 | 383 | 321 | 369 | 862.76 | 214 | 266 | 261 | 308 | 269 | 295 | 268 | 249 | 197 |
| 520.71 | 453 | 348 | 472 | 522 | 418 | 501 | 378 | 317 | 362 | 863.07 | 217 | 268 | 266 | 312 | 272 | 299 | 270 | 254 | 199 |
| 521.07 | 456 | 349 | 467 | 517 | 422 | 505 | 374 | 318 | 368 | 863.38 | 216 | 267 | 269 | 305 | 272 | 291 | 267 | 249 | 199 |
| 521.42 | 454 | 347 | 463 | 515 | 419 | 499 | 372 | 317 | 372 | 863.69 | 221 | 270 | 274 | 307 | 276 | 292 | 275 | 252 | 204 |
| 521.78 | 448 | 343 | 462 | 508 | 414 | 500 | 367 | 314 | 376 | 864    | 216 | 265 | 272 | 303 | 273 | 289 | 273 | 246 | 202 |
| 522.13 | 444 | 335 | 465 | 498 | 404 | 494 | 360 | 307 | 371 | 864.31 | 213 | 268 | 268 | 303 | 274 | 297 | 276 | 249 | 200 |
| 522.49 | 442 | 332 | 466 | 498 | 400 | 495 | 357 | 302 | 363 | 864.62 | 213 | 271 | 270 | 307 | 272 | 297 | 275 | 248 | 197 |
| 522.84 | 443 | 329 | 462 | 495 | 401 | 495 | 354 | 297 | 360 | 864.93 | 217 | 274 | 270 | 306 | 272 | 297 | 272 | 247 | 197 |
| 523.2  | 448 | 332 | 459 | 502 | 398 | 494 | 355 | 295 | 361 | 865.24 | 216 | 271 | 268 | 304 | 268 | 292 | 270 | 239 | 194 |
| 523.56 | 448 | 328 | 461 | 499 | 397 | 487 | 356 | 296 | 370 | 865.55 | 211 | 264 | 264 | 300 | 264 | 291 | 264 | 234 | 192 |
| 523.91 | 457 | 328 | 464 | 504 | 397 | 488 | 359 | 300 | 376 | 865.86 | 211 | 267 | 264 | 302 | 265 | 292 | 267 | 237 | 194 |
| 524.27 | 457 | 326 | 463 | 499 | 399 | 489 | 357 | 299 | 377 | 866.17 | 213 | 266 | 262 | 299 | 266 | 291 | 263 | 240 | 193 |
| 524.62 | 460 | 322 | 458 | 489 | 396 | 484 | 354 | 295 | 372 | 866.48 | 214 | 267 | 261 | 297 | 269 | 288 | 264 | 241 | 193 |
| 524.98 | 451 | 318 | 454 | 479 | 391 | 476 | 346 | 293 | 365 | 866.79 | 210 | 260 | 258 | 294 | 267 | 284 | 261 | 236 | 189 |
| 525.33 | 448 | 314 | 451 | 473 | 386 | 478 | 345 | 292 | 365 | 867.1  | 209 | 260 | 259 | 295 | 270 | 285 | 263 | 234 | 191 |
| 525.69 | 448 | 308 | 441 | 466 | 377 | 474 | 337 | 284 | 362 | 867.41 | 208 | 259 | 255 | 291 | 266 | 282 | 265 | 231 | 193 |
| 526.04 | 459 | 310 | 442 | 470 | 378 | 474 | 334 | 277 | 367 | 867.72 | 208 | 257 | 254 | 291 | 264 | 281 | 265 | 230 | 193 |
| 526.4  | 461 | 309 | 438 | 466 | 368 | 466 | 331 | 278 | 367 | 868.04 | 205 | 255 | 251 | 291 | 260 | 276 | 265 | 230 | 192 |
| 526.76 | 460 | 307 | 445 | 465 | 368 | 469 | 327 | 279 | 370 | 868.35 | 207 | 252 | 251 | 291 | 256 | 281 | 259 | 227 | 189 |
| 527.11 | 459 | 302 | 439 | 456 | 358 | 467 | 325 | 277 | 372 | 868.65 | 207 | 248 | 250 | 290 | 254 | 278 | 258 | 228 | 190 |
| 527.47 | 461 | 298 | 437 | 451 | 355 | 460 | 316 | 270 | 366 | 868.96 | 204 | 246 | 249 | 288 | 253 | 276 | 254 | 228 | 188 |
| 527.82 | 459 | 301 | 428 | 449 | 349 | 450 | 314 | 271 | 366 | 869.27 | 202 | 247 | 246 | 289 | 256 | 272 | 253 | 228 | 187 |
| 528.18 | 456 | 297 | 427 | 442 | 346 | 446 | 309 | 269 | 360 | 869.58 | 203 | 248 | 248 | 291 | 258 | 273 | 253 | 228 | 185 |
| 528.53 | 456 | 294 | 421 | 435 | 341 | 444 | 304 | 265 | 358 | 869.89 | 207 | 248 | 247 | 287 | 254 | 273 | 255 | 227 | 183 |
| 528.89 | 457 | 279 | 413 | 423 | 336 | 436 | 293 | 254 | 352 | 870.2  | 208 | 246 | 252 | 284 | 251 | 274 | 254 | 230 | 183 |
| 529.24 | 454 | 276 | 405 | 418 | 333 | 431 | 288 | 250 | 356 | 870.51 | 206 | 245 | 250 | 281 | 251 | 273 | 250 | 229 | 182 |
| 529.6  | 452 | 275 | 402 | 414 | 332 | 427 | 281 | 247 | 357 | 870.82 | 205 | 246 | 249 | 283 | 251 | 275 | 251 | 230 | 185 |
| 529.95 | 454 | 281 | 403 | 418 | 332 | 434 | 283 | 251 | 363 | 871.13 | 204 | 247 | 242 | 284 | 252 | 273 | 252 | 228 | 183 |
| 530.31 | 458 | 275 | 401 | 416 | 323 | 428 | 278 | 247 | 362 | 871.44 | 206 | 249 | 244 | 284 | 252 | 274 | 255 | 228 | 186 |
| 530.66 | 455 | 266 | 398 | 412 | 320 | 424 | 277 | 239 | 358 | 871.75 | 205 | 246 | 243 | 281 | 247 | 270 | 249 | 224 | 185 |
| 531.02 | 453 | 262 | 398 | 404 | 316 | 419 | 274 | 234 | 356 | 872.06 | 202 | 242 | 240 | 276 | 250 | 264 | 246 | 221 | 188 |
| 531.37 | 456 | 266 | 403 | 402 | 320 | 422 | 274 | 235 | 351 | 872.37 | 203 | 241 | 242 | 274 | 244 | 260 | 246 | 223 | 187 |
| 531.73 | 457 | 267 | 400 | 402 | 317 | 419 | 268 | 238 | 354 | 872.68 | 202 | 245 | 237 | 273 | 245 | 259 | 248 | 222 | 186 |
| 532.08 | 458 | 265 | 398 | 402 | 320 | 421 | 265 | 235 | 353 | 872.99 | 199 | 246 | 243 | 273 | 239 | 258 | 248 | 221 | 184 |
| 532.43 | 455 | 259 | 388 | 390 | 315 | 412 | 260 | 227 | 352 | 873.3  | 195 | 242 | 235 | 271 | 241 | 260 | 245 | 218 | 181 |
| 532.79 | 460 | 256 | 390 | 386 | 314 | 416 | 265 | 227 | 356 | 873.61 | 196 | 242 | 239 | 272 | 241 | 261 | 246 | 221 | 182 |
| 533.14 | 456 | 254 | 385 | 379 | 311 | 412 | 257 | 228 | 353 | 873.92 | 199 | 239 | 236 | 271 | 239 | 261 | 242 | 221 | 181 |
| 533.5  | 453 | 250 | 383 | 378 | 306 | 412 | 248 | 223 | 353 | 874.22 | 198 | 239 | 233 | 267 | 235 | 255 | 242 | 219 | 180 |
| 533.85 | 450 | 251 | 381 | 374 | 305 | 403 | 242 | 221 | 347 | 874.53 | 196 | 237 | 234 | 268 | 234 | 254 | 240 | 219 | 179 |
| 534.21 | 456 | 248 | 382 | 373 | 300 | 402 | 247 | 224 | 351 | 874.84 | 192 | 239 | 230 | 261 | 236 | 252 | 239 | 217 | 179 |
| 534.56 | 462 | 251 | 383 | 375 | 303 | 401 | 251 | 230 | 353 | 875.15 | 193 | 236 | 232 | 261 | 239 | 256 | 236 | 216 | 178 |
| 534.92 | 462 | 242 | 378 | 372 | 293 | 396 | 245 | 224 | 355 | 875.46 | 195 | 234 | 232 | 256 | 239 | 257 | 237 | 213 | 179 |
| 535.27 | 457 | 238 | 372 | 374 | 287 | 391 | 242 | 222 | 351 | 875.77 | 197 | 233 | 233 | 259 | 239 | 259 | 237 | 214 | 179 |
| 535.63 | 447 | 227 | 369 | 366 | 280 | 384 | 237 | 216 | 344 | 876.08 | 201 | 237 | 234 | 261 | 240 | 259 | 240 | 219 | 181 |
| 535.98 | 448 | 233 | 369 | 370 | 284 | 384 | 240 | 219 | 346 | 876.39 | 198 | 235 | 230 | 259 | 236 | 254 | 234 | 218 | 177 |
| 536.33 | 449 | 234 | 372 | 365 | 285 | 388 | 237 | 215 | 345 | 876.7  | 199 | 234 | 229 | 259 | 237 | 249 | 233 | 220 | 175 |
| 536.69 | 454 | 240 | 372 | 363 | 284 | 390 | 238 | 217 | 350 | 877    | 196 | 230 | 228 | 253 | 231 | 245 | 231 | 211 | 174 |
| 537.04 | 456 | 238 | 374 | 358 | 283 | 396 | 238 | 216 | 351 | 877.31 | 199 | 228 | 226 | 253 | 230 | 246 | 232 | 209 | 176 |
| 537.4  | 459 | 239 | 373 | 361 | 283 | 398 | 241 | 218 | 354 | 877.62 | 197 | 224 | 227 | 250 | 226 | 248 | 229 | 206 | 176 |
| 537.75 | 466 | 240 | 375 | 367 | 284 | 404 | 251 | 222 | 360 | 877.93 | 195 | 224 | 226 | 251 | 226 | 251 | 227 | 207 | 173 |
| 538.11 | 464 | 239 | 371 | 365 | 281 | 399 | 250 | 217 | 358 | 878.24 | 195 | 226 | 228 | 252 | 227 | 251 | 225 | 209 | 172 |
| 538.46 | 464 | 242 | 373 | 363 | 282 | 394 | 249 | 218 | 357 | 878.55 | 195 | 228 | 225 | 253 | 225 | 250 | 227 | 207 | 177 |
| 538.81 | 459 | 240 | 373 | 361 | 278 | 389 | 243 | 213 | 355 | 878.85 | 195 | 226 | 223 | 252 | 223 | 245 | 225 | 205 | 178 |
| 539.17 | 462 | 243 | 375 | 363 | 280 | 391 | 244 | 219 | 360 | 879.16 | 190 | 224 | 217 | 245 | 221 | 241 | 224 | 202 | 178 |
| 539.52 | 460 | 239 | 374 | 365 | 276 | 390 | 240 | 216 | 359 | 879.47 | 186 | 222 | 217 | 245 | 223 | 239 | 222 | 201 | 174 |
| 539.88 | 463 | 239 | 373 | 365 | 279 | 390 | 240 | 217 | 358 | 879.78 | 187 | 224 | 219 | 245 | 226 | 236 | 223 | 202 | 178 |
| 540.23 | 462 | 237 | 370 | 361 | 276 | 389 | 236 | 212 | 352 | 880.09 | 189 | 220 | 218 | 247 | 226 | 237 | 222 | 201 | 175 |
| 540.58 | 463 | 234 | 365 | 358 | 275 | 388 | 234 | 212 | 350 | 880.39 | 190 | 218 | 217 | 243 | 220 | 235 | 219 | 202 | 173 |
| 540.94 | 460 | 232 | 360 | 357 | 271 | 386 | 233 | 211 | 349 | 880.7  | 191 | 219 | 215 | 247 | 220 | 239 | 219 | 204 | 171 |
| 541.29 | 459 | 230 | 359 | 360 | 272 | 384 | 235 | 211 | 350 | 881.01 | 190 | 226 | 220 | 249 | 223 | 240 | 221 | 206 | 174 |
| 541.64 | 455 | 230 | 361 | 358 | 275 | 381 | 233 | 209 | 348 | 881.32 | 189 | 226 | 220 | 249 | 225 | 239 | 223 | 206 | 175 |
| 542    | 459 | 232 | 367 | 361 | 280 | 388 | 234 | 208 | 351 | 881.63 | 186 | 224 | 218 | 244 | 222 | 236 | 220 | 204 | 173 |
| 542.35 | 457 | 231 | 374 | 360 | 283 | 393 | 237 | 207 | 350 | 881.93 | 190 | 221 | 218 | 245 | 217 | 235 | 217 | 203 | 173 |
| 542.71 | 461 | 233 | 380 | 363 | 285 | 398 | 243 | 209 | 356 | 882.24 | 191 | 222 | 217 | 246 | 219 | 235 | 218 | 202 | 174 |
| 543.06 | 456 | 233 | 377 | 359 | 288 | 398 | 236 | 211 | 349 | 882.55 | 189 | 217 | 218 | 245 | 218 | 232 | 218 | 199 | 174 |
| 543.41 | 462 | 234 | 378 | 361 | 283 | 393 | 235 | 216 | 352 | 882.86 | 186 | 214 | 214 | 243 | 218 | 229 | 216 | 195 | 171 |
| 543.77 | 468 | 240 | 379 | 364 | 292 | 394 | 236 | 220 | 355 | 883.16 | 186 | 214 | 211 | 240 | 216 | 230 | 214 | 195 | 169 |
| 544.12 | 471 | 242 | 386 | 369 | 294 | 396 | 249 | 224 | 362 | 883.47 | 187 | 215 | 208 | 239 | 217 | 231 | 214 | 196 | 168 |
| 544.47 | 469 | 246 | 388 | 375 | 301 | 401 | 247 | 222 | 356 | 883.78 | 185 | 218 | 208 | 238 | 219 | 233 | 215 | 199 | 169 |
| 544.83 | 465 | 247 | 389 | 380 | 295 | 403 | 251 | 222 | 355 | 884.09 | 185 | 217 | 214 | 239 | 216 | 23  |     |     |     |

|        |     |     |     |     |     |     |     |     |     |        |     |     |     |     |     |     |     |     |     |
|--------|-----|-----|-----|-----|-----|-----|-----|-----|-----|--------|-----|-----|-----|-----|-----|-----|-----|-----|-----|
| 548.36 | 476 | 276 | 420 | 426 | 331 | 446 | 285 | 247 | 363 | 887.16 | 183 | 208 | 206 | 233 | 214 | 226 | 215 | 198 | 168 |
| 548.71 | 479 | 276 | 422 | 429 | 338 | 451 | 286 | 250 | 363 | 887.46 | 183 | 210 | 205 | 235 | 216 | 225 | 213 | 195 | 168 |
| 549.06 | 475 | 276 | 421 | 431 | 340 | 446 | 284 | 247 | 360 | 887.77 | 184 | 210 | 208 | 234 | 213 | 225 | 212 | 192 | 167 |
| 549.42 | 480 | 281 | 428 | 433 | 347 | 455 | 290 | 254 | 364 | 888.08 | 184 | 212 | 211 | 234 | 211 | 226 | 209 | 192 | 168 |
| 549.77 | 477 | 290 | 431 | 439 | 353 | 453 | 292 | 257 | 362 | 888.38 | 186 | 211 | 210 | 232 | 212 | 226 | 209 | 194 | 168 |
| 550.12 | 483 | 298 | 443 | 451 | 364 | 462 | 304 | 266 | 368 | 888.69 | 184 | 214 | 211 | 234 | 213 | 224 | 209 | 194 | 169 |
| 550.48 | 485 | 303 | 442 | 461 | 370 | 467 | 304 | 267 | 373 | 889    | 188 | 216 | 212 | 237 | 214 | 224 | 212 | 198 | 170 |
| 550.83 | 485 | 305 | 447 | 468 | 369 | 472 | 307 | 267 | 373 | 889.3  | 186 | 216 | 210 | 237 | 213 | 225 | 212 | 196 | 172 |
| 551.18 | 480 | 309 | 447 | 474 | 367 | 475 | 308 | 268 | 373 | 889.61 | 187 | 217 | 211 | 236 | 217 | 229 | 214 | 199 | 178 |
| 551.53 | 477 | 308 | 450 | 477 | 364 | 475 | 311 | 268 | 366 | 889.91 | 185 | 212 | 208 | 228 | 213 | 227 | 212 | 198 | 178 |
| 551.89 | 478 | 310 | 454 | 480 | 371 | 490 | 318 | 278 | 371 | 890.22 | 184 | 209 | 208 | 225 | 212 | 227 | 208 | 199 | 174 |
| 552.24 | 487 | 316 | 467 | 492 | 382 | 504 | 330 | 287 | 378 | 890.53 | 182 | 207 | 204 | 221 | 205 | 223 | 204 | 198 | 168 |
| 552.59 | 486 | 314 | 471 | 495 | 389 | 509 | 332 | 290 | 379 | 890.83 | 183 | 209 | 207 | 225 | 207 | 224 | 206 | 196 | 170 |
| 552.94 | 489 | 316 | 476 | 500 | 396 | 506 | 336 | 287 | 378 | 891.14 | 181 | 208 | 208 | 225 | 204 | 222 | 207 | 194 | 170 |
| 553.3  | 484 | 314 | 474 | 499 | 397 | 505 | 333 | 281 | 373 | 891.45 | 181 | 206 | 206 | 226 | 203 | 220 | 206 | 191 | 171 |
| 553.65 | 484 | 324 | 478 | 504 | 402 | 503 | 343 | 287 | 372 | 891.75 | 179 | 207 | 204 | 225 | 203 | 219 | 204 | 191 | 172 |
| 554    | 482 | 328 | 479 | 506 | 402 | 503 | 341 | 287 | 373 | 892.06 | 183 | 211 | 203 | 225 | 204 | 219 | 208 | 190 | 171 |
| 554.35 | 484 | 330 | 481 | 513 | 400 | 508 | 343 | 288 | 372 | 892.36 | 184 | 212 | 203 | 227 | 206 | 223 | 206 | 190 | 169 |
| 554.71 | 490 | 331 | 487 | 520 | 410 | 510 | 347 | 289 | 379 | 892.67 | 182 | 211 | 200 | 222 | 203 | 220 | 201 | 187 | 165 |
| 555.06 | 496 | 330 | 488 | 530 | 414 | 520 | 354 | 297 | 379 | 892.97 | 178 | 205 | 201 | 220 | 206 | 220 | 199 | 190 | 166 |
| 555.41 | 496 | 332 | 493 | 532 | 420 | 524 | 359 | 307 | 379 | 893.28 | 178 | 204 | 200 | 219 | 208 | 216 | 202 | 194 | 166 |
| 555.76 | 493 | 327 | 493 | 541 | 417 | 533 | 360 | 309 | 374 | 893.59 | 179 | 205 | 204 | 222 | 211 | 218 | 207 | 196 | 169 |
| 556.12 | 493 | 332 | 493 | 543 | 421 | 529 | 363 | 308 | 375 | 893.89 | 180 | 207 | 200 | 227 | 208 | 215 | 207 | 193 | 166 |
| 556.47 | 495 | 336 | 496 | 545 | 426 | 531 | 370 | 308 | 379 | 894.2  | 181 | 205 | 201 | 225 | 205 | 217 | 205 | 192 | 168 |
| 556.82 | 495 | 343 | 500 | 542 | 430 | 541 | 374 | 309 | 384 | 894.5  | 181 | 202 | 200 | 225 | 204 | 216 | 202 | 195 | 168 |
| 557.17 | 497 | 348 | 509 | 550 | 433 | 554 | 381 | 314 | 390 | 894.81 | 181 | 203 | 202 | 222 | 203 | 220 | 203 | 196 | 171 |
| 557.52 | 499 | 353 | 506 | 556 | 437 | 558 | 384 | 314 | 384 | 895.11 | 182 | 205 | 203 | 220 | 207 | 222 | 203 | 194 | 172 |
| 557.88 | 509 | 358 | 510 | 562 | 448 | 557 | 388 | 319 | 388 | 895.42 | 177 | 200 | 198 | 218 | 203 | 216 | 200 | 185 | 167 |
| 558.23 | 508 | 358 | 516 | 563 | 453 | 555 | 389 | 322 | 391 | 895.72 | 177 | 200 | 198 | 216 | 203 | 212 | 202 | 184 | 165 |
| 558.58 | 511 | 358 | 519 | 568 | 456 | 556 | 390 | 327 | 401 | 896.03 | 172 | 195 | 196 | 216 | 199 | 204 | 201 | 183 | 160 |
| 558.93 | 505 | 358 | 525 | 570 | 448 | 560 | 391 | 325 | 401 | 896.34 | 173 | 199 | 197 | 219 | 200 | 208 | 203 | 186 | 162 |
| 559.28 | 500 | 359 | 518 | 571 | 447 | 562 | 394 | 327 | 400 | 896.64 | 174 | 198 | 198 | 219 | 203 | 209 | 202 | 188 | 161 |
| 559.64 | 492 | 359 | 520 | 565 | 442 | 553 | 392 | 322 | 394 | 896.95 | 176 | 199 | 198 | 218 | 204 | 212 | 201 | 188 | 164 |
| 559.99 | 491 | 358 | 515 | 563 | 444 | 552 | 392 | 322 | 386 | 897.25 | 181 | 203 | 204 | 224 | 207 | 216 | 205 | 192 | 169 |
| 560.34 | 496 | 359 | 517 | 562 | 447 | 549 | 390 | 318 | 384 | 897.56 | 181 | 204 | 203 | 225 | 202 | 214 | 203 | 189 | 170 |
| 560.69 | 498 | 358 | 515 | 567 | 446 | 553 | 391 | 316 | 383 | 897.86 | 180 | 203 | 199 | 225 | 202 | 211 | 204 | 186 | 170 |
| 561.04 | 505 | 365 | 517 | 563 | 448 | 556 | 393 | 315 | 388 | 898.17 | 177 | 201 | 194 | 218 | 201 | 206 | 200 | 186 | 167 |
| 561.39 | 504 | 367 | 520 | 558 | 441 | 562 | 391 | 313 | 388 | 898.47 | 177 | 198 | 197 | 216 | 202 | 206 | 202 | 185 | 168 |
| 561.75 | 512 | 369 | 528 | 558 | 446 | 568 | 391 | 322 | 391 | 898.77 | 178 | 199 | 199 | 219 | 202 | 207 | 201 | 187 | 168 |
| 562.1  | 510 | 358 | 521 | 561 | 442 | 563 | 388 | 323 | 388 | 899.08 | 177 | 197 | 200 | 219 | 201 | 208 | 199 | 187 | 168 |
| 562.45 | 511 | 353 | 518 | 565 | 442 | 559 | 384 | 318 | 387 | 899.38 | 176 | 199 | 197 | 219 | 200 | 213 | 198 | 187 | 166 |
| 562.8  | 510 | 354 | 509 | 564 | 440 | 557 | 386 | 310 | 390 | 899.69 | 177 | 199 | 196 | 214 | 199 | 214 | 196 | 188 | 165 |
| 563.15 | 512 | 358 | 509 | 563 | 437 | 554 | 386 | 308 | 390 | 899.99 | 178 | 200 | 194 | 212 | 200 | 214 | 198 | 185 | 165 |
| 563.5  | 517 | 361 | 515 | 560 | 440 | 552 | 383 | 314 | 393 | 900.3  | 180 | 201 | 195 | 212 | 203 | 212 | 202 | 189 | 166 |
| 563.85 | 517 | 359 | 520 | 555 | 435 | 549 | 380 | 318 | 394 | 900.6  | 180 | 202 | 196 | 215 | 205 | 211 | 207 | 188 | 167 |
| 564.21 | 518 | 359 | 523 | 557 | 437 | 553 | 375 | 319 | 395 | 900.91 | 179 | 202 | 196 | 216 | 205 | 212 | 204 | 186 | 165 |
| 564.56 | 515 | 354 | 516 | 554 | 435 | 548 | 379 | 311 | 394 | 901.21 | 178 | 201 | 196 | 216 | 202 | 208 | 201 | 184 | 163 |
| 564.91 | 520 | 351 | 509 | 553 | 435 | 546 | 373 | 311 | 394 | 901.52 | 177 | 200 | 194 | 214 | 199 | 211 | 196 | 182 | 161 |
| 565.26 | 524 | 348 | 509 | 549 | 435 | 542 | 378 | 310 | 396 | 901.82 | 178 | 199 | 197 | 215 | 195 | 210 | 196 | 183 | 163 |
| 565.61 | 523 | 348 | 515 | 546 | 432 | 543 | 372 | 314 | 400 | 902.12 | 177 | 194 | 199 | 215 | 195 | 212 | 194 | 182 | 163 |
| 565.96 | 515 | 347 | 514 | 542 | 433 | 541 | 369 | 308 | 401 | 902.43 | 177 | 194 | 198 | 215 | 198 | 210 | 197 | 181 | 163 |
| 566.31 | 508 | 344 | 508 | 535 | 424 | 538 | 360 | 302 | 402 | 902.73 | 174 | 196 | 195 | 213 | 199 | 209 | 198 | 182 | 162 |
| 566.66 | 511 | 348 | 501 | 531 | 422 | 540 | 360 | 303 | 403 | 903.04 | 175 | 197 | 193 | 215 | 199 | 209 | 199 | 181 | 165 |
| 567.02 | 514 | 342 | 495 | 521 | 413 | 532 | 357 | 302 | 400 | 903.34 | 178 | 197 | 197 | 216 | 200 | 212 | 202 | 186 | 169 |
| 567.37 | 512 | 335 | 489 | 509 | 409 | 524 | 351 | 298 | 395 | 903.64 | 178 | 192 | 196 | 217 | 200 | 212 | 202 | 184 | 171 |
| 567.72 | 515 | 328 | 483 | 500 | 403 | 516 | 340 | 294 | 393 | 903.95 | 177 | 188 | 193 | 218 | 197 | 210 | 199 | 183 | 169 |
| 568.07 | 516 | 322 | 483 | 504 | 403 | 516 | 341 | 290 | 394 | 904.25 | 176 | 189 | 193 | 219 | 194 | 210 | 196 | 182 | 166 |
| 568.42 | 520 | 319 | 483 | 503 | 397 | 508 | 335 | 287 | 401 | 904.56 | 176 | 190 | 192 | 217 | 192 | 210 | 197 | 180 | 163 |
| 568.77 | 516 | 313 | 483 | 499 | 391 | 507 | 335 | 281 | 400 | 904.86 | 189 | 209 | 208 | 231 | 209 | 225 | 215 | 195 | 174 |
| 569.12 | 517 | 317 | 483 | 487 | 380 | 497 | 326 | 280 | 400 | 905.16 | 186 | 208 | 207 | 227 | 209 | 222 | 212 | 195 | 174 |
| 569.47 | 520 | 314 | 475 | 481 | 375 | 497 | 323 | 279 | 392 | 905.47 | 186 | 208 | 207 | 227 | 212 | 221 | 209 | 197 | 176 |
| 569.82 | 518 | 316 | 468 | 470 | 375 | 488 | 315 | 280 | 393 | 905.77 | 174 | 194 | 190 | 208 | 197 | 205 | 194 | 184 | 164 |
| 570.17 | 515 | 307 | 462 | 464 | 366 | 484 | 307 | 273 | 388 | 906.07 | 176 | 194 | 187 | 213 | 197 | 205 | 196 | 184 | 162 |
| 570.52 | 518 | 308 | 464 | 460 | 365 | 482 | 309 | 275 | 393 | 906.38 | 177 | 194 | 187 | 213 | 196 | 204 | 195 | 183 | 159 |
| 570.87 | 517 | 296 | 460 | 454 | 352 | 474 | 303 | 269 | 390 | 906.68 | 175 | 194 | 188 | 212 | 194 | 204 | 194 | 181 | 157 |
| 571.22 | 518 | 290 | 447 | 448 | 351 | 476 | 304 | 269 | 392 | 906.98 | 173 | 193 | 190 | 212 | 193 | 204 | 194 | 180 | 159 |
| 571.57 | 512 | 282 | 437 | 439 | 343 | 466 | 297 | 259 | 389 | 907.29 | 172 | 193 | 189 | 213 | 193 | 202 | 193 | 180 | 156 |
| 571.93 | 510 | 282 | 428 | 428 | 337 | 457 | 291 | 252 | 387 | 907.59 | 174 | 191 | 188 | 215 | 193 | 202 | 193 | 180 | 159 |
| 572.28 | 509 | 283 | 433 | 424 | 333 | 453 | 284 | 252 | 387 | 907.89 | 176 | 190 | 188 | 213 | 195 | 199 | 191 | 181 | 160 |
| 572.63 | 505 | 281 | 428 | 420 | 331 | 453 | 273 | 253 | 389 | 908.2  | 173 | 187 | 188 | 211 | 195 | 202 | 193 | 180 | 164 |
| 572.98 | 506 | 275 | 426 | 421 | 328 | 456 | 274 | 251 | 386 | 908.5  | 172 | 191 | 188 | 211 | 196 | 204 | 193 | 182 | 165 |
| 573.33 | 500 | 269 | 414 | 413 | 320 | 450 | 266 | 243 | 383 | 908.8  | 169 | 192 | 186 | 209 | 193 | 204 | 195 | 179 | 163 |
| 573.68 | 504 | 270 | 410 | 408 | 319 | 446 | 269 | 241 | 376 | 909.11 | 171 | 195 | 187 | 210 | 194 |     |     |     |     |

|        |     |     |     |      |     |      |     |     |     |        |     |     |     |     |     |     |     |     |     |
|--------|-----|-----|-----|------|-----|------|-----|-----|-----|--------|-----|-----|-----|-----|-----|-----|-----|-----|-----|
| 577.18 | 506 | 262 | 411 | 396  | 306 | 431  | 256 | 235 | 381 | 912.13 | 175 | 187 | 187 | 206 | 189 | 197 | 191 | 176 | 160 |
| 577.53 | 506 | 263 | 411 | 396  | 305 | 432  | 258 | 236 | 382 | 912.43 | 174 | 187 | 186 | 207 | 189 | 202 | 191 | 176 | 160 |
| 577.88 | 506 | 265 | 413 | 397  | 306 | 433  | 259 | 242 | 382 | 912.74 | 174 | 190 | 187 | 206 | 190 | 201 | 190 | 176 | 161 |
| 578.23 | 504 | 266 | 410 | 397  | 304 | 437  | 262 | 243 | 379 | 913.04 | 172 | 188 | 184 | 205 | 185 | 198 | 189 | 174 | 160 |
| 578.58 | 509 | 271 | 416 | 404  | 312 | 443  | 268 | 250 | 383 | 913.34 | 175 | 189 | 186 | 204 | 185 | 198 | 186 | 176 | 159 |
| 578.93 | 510 | 272 | 419 | 409  | 320 | 450  | 273 | 251 | 384 | 913.64 | 173 | 183 | 182 | 200 | 183 | 194 | 182 | 172 | 156 |
| 579.28 | 513 | 270 | 425 | 419  | 330 | 449  | 278 | 257 | 384 | 913.95 | 173 | 185 | 180 | 198 | 185 | 197 | 180 | 172 | 155 |
| 579.63 | 507 | 272 | 426 | 421  | 331 | 449  | 282 | 257 | 383 | 914.25 | 170 | 185 | 178 | 199 | 184 | 193 | 183 | 170 | 154 |
| 579.98 | 509 | 285 | 437 | 432  | 342 | 453  | 292 | 265 | 384 | 914.55 | 169 | 188 | 180 | 202 | 184 | 194 | 185 | 172 | 155 |
| 580.33 | 512 | 295 | 443 | 436  | 348 | 467  | 300 | 268 | 387 | 914.85 | 169 | 186 | 183 | 205 | 185 | 195 | 187 | 174 | 158 |
| 580.67 | 520 | 302 | 457 | 448  | 361 | 475  | 309 | 277 | 390 | 915.15 | 169 | 185 | 183 | 203 | 184 | 194 | 184 | 172 | 157 |
| 581.02 | 523 | 303 | 466 | 458  | 364 | 483  | 314 | 286 | 388 | 915.46 | 170 | 185 | 181 | 203 | 184 | 197 | 182 | 172 | 156 |
| 581.37 | 521 | 310 | 475 | 475  | 371 | 493  | 322 | 291 | 389 | 915.76 | 170 | 186 | 180 | 200 | 185 | 195 | 181 | 173 | 154 |
| 581.72 | 518 | 318 | 486 | 489  | 376 | 503  | 329 | 295 | 389 | 916.06 | 170 | 183 | 179 | 199 | 183 | 195 | 183 | 172 | 154 |
| 582.07 | 518 | 330 | 491 | 498  | 389 | 513  | 334 | 295 | 393 | 916.36 | 170 | 180 | 181 | 197 | 184 | 189 | 184 | 172 | 156 |
| 582.42 | 523 | 337 | 501 | 512  | 399 | 512  | 341 | 299 | 394 | 916.66 | 169 | 179 | 180 | 198 | 183 | 188 | 183 | 171 | 158 |
| 582.77 | 524 | 339 | 505 | 524  | 408 | 521  | 352 | 304 | 395 | 916.96 | 169 | 177 | 179 | 195 | 185 | 186 | 182 | 170 | 158 |
| 583.12 | 522 | 353 | 512 | 545  | 423 | 539  | 367 | 315 | 400 | 917.27 | 168 | 177 | 174 | 195 | 181 | 187 | 181 | 168 | 154 |
| 583.47 | 523 | 361 | 519 | 555  | 437 | 558  | 377 | 326 | 403 | 917.57 | 168 | 175 | 174 | 192 | 183 | 188 | 181 | 166 | 153 |
| 583.82 | 528 | 373 | 532 | 570  | 455 | 575  | 390 | 336 | 409 | 917.87 | 169 | 181 | 179 | 197 | 184 | 194 | 183 | 169 | 157 |
| 584.17 | 530 | 383 | 546 | 585  | 465 | 580  | 403 | 345 | 409 | 918.17 | 170 | 185 | 182 | 201 | 186 | 196 | 184 | 171 | 159 |
| 584.52 | 531 | 399 | 562 | 607  | 486 | 597  | 421 | 355 | 410 | 918.47 | 169 | 186 | 182 | 202 | 185 | 194 | 187 | 174 | 158 |
| 584.87 | 525 | 409 | 569 | 622  | 492 | 608  | 432 | 366 | 410 | 918.77 | 168 | 181 | 177 | 198 | 184 | 192 | 185 | 170 | 156 |
| 585.21 | 528 | 417 | 579 | 643  | 504 | 628  | 448 | 375 | 409 | 919.07 | 168 | 178 | 178 | 195 | 183 | 191 | 184 | 170 | 155 |
| 585.56 | 532 | 424 | 594 | 655  | 512 | 643  | 463 | 383 | 414 | 919.37 | 167 | 177 | 177 | 196 | 183 | 190 | 182 | 170 | 155 |
| 585.91 | 536 | 435 | 604 | 676  | 528 | 657  | 481 | 394 | 414 | 919.68 | 167 | 177 | 177 | 196 | 180 | 188 | 180 | 173 | 156 |
| 586.26 | 538 | 447 | 619 | 696  | 545 | 672  | 496 | 406 | 418 | 919.98 | 165 | 175 | 174 | 193 | 178 | 185 | 178 | 170 | 155 |
| 586.61 | 530 | 459 | 624 | 714  | 557 | 677  | 512 | 415 | 419 | 920.28 | 164 | 176 | 173 | 190 | 178 | 183 | 178 | 168 | 155 |
| 586.96 | 535 | 478 | 641 | 733  | 578 | 689  | 527 | 424 | 429 | 920.58 | 165 | 174 | 175 | 190 | 178 | 181 | 177 | 166 | 154 |
| 587.31 | 535 | 492 | 651 | 756  | 596 | 707  | 539 | 433 | 435 | 920.88 | 164 | 173 | 176 | 191 | 179 | 182 | 177 | 167 | 152 |
| 587.66 | 547 | 507 | 656 | 778  | 613 | 721  | 552 | 444 | 435 | 921.18 | 163 | 169 | 178 | 192 | 180 | 184 | 176 | 165 | 150 |
| 588.01 | 548 | 514 | 664 | 796  | 627 | 742  | 566 | 459 | 440 | 921.48 | 162 | 167 | 177 | 191 | 182 | 185 | 178 | 164 | 149 |
| 588.35 | 549 | 526 | 671 | 803  | 638 | 745  | 578 | 466 | 438 | 921.78 | 163 | 171 | 179 | 192 | 183 | 185 | 180 | 165 | 154 |
| 588.7  | 546 | 535 | 688 | 818  | 647 | 763  | 588 | 480 | 444 | 922.08 | 165 | 176 | 178 | 193 | 181 | 186 | 182 | 167 | 157 |
| 589.05 | 548 | 549 | 699 | 841  | 654 | 775  | 601 | 488 | 446 | 922.38 | 164 | 178 | 177 | 193 | 177 | 185 | 180 | 166 | 155 |
| 589.4  | 550 | 554 | 709 | 857  | 660 | 789  | 615 | 498 | 453 | 922.68 | 162 | 175 | 175 | 190 | 175 | 185 | 178 | 167 | 152 |
| 589.75 | 555 | 563 | 710 | 865  | 675 | 801  | 628 | 503 | 455 | 922.98 | 159 | 171 | 171 | 184 | 171 | 183 | 172 | 166 | 149 |
| 590.1  | 551 | 567 | 715 | 878  | 690 | 813  | 640 | 504 | 452 | 923.28 | 157 | 171 | 169 | 186 | 173 | 181 | 171 | 166 | 150 |
| 590.45 | 550 | 574 | 717 | 890  | 701 | 825  | 645 | 511 | 450 | 923.58 | 155 | 168 | 166 | 185 | 171 | 178 | 167 | 163 | 150 |
| 590.79 | 547 | 584 | 733 | 911  | 706 | 837  | 652 | 518 | 455 | 923.88 | 156 | 166 | 168 | 185 | 172 | 179 | 167 | 163 | 151 |
| 591.14 | 552 | 590 | 738 | 919  | 716 | 841  | 658 | 529 | 452 | 924.19 | 158 | 163 | 168 | 179 | 176 | 179 | 169 | 161 | 151 |
| 591.49 | 560 | 609 | 749 | 938  | 729 | 852  | 675 | 536 | 459 | 924.49 | 159 | 165 | 169 | 179 | 178 | 179 | 172 | 161 | 150 |
| 591.84 | 561 | 613 | 754 | 952  | 740 | 860  | 686 | 541 | 456 | 924.79 | 159 | 164 | 168 | 178 | 177 | 174 | 171 | 161 | 150 |
| 592.19 | 562 | 627 | 766 | 963  | 751 | 872  | 702 | 551 | 466 | 925.09 | 159 | 167 | 169 | 181 | 173 | 174 | 171 | 161 | 150 |
| 592.53 | 558 | 627 | 766 | 967  | 757 | 876  | 707 | 558 | 466 | 925.39 | 162 | 170 | 168 | 180 | 173 | 175 | 170 | 161 | 152 |
| 592.88 | 560 | 639 | 774 | 975  | 769 | 882  | 711 | 565 | 470 | 925.69 | 163 | 172 | 167 | 181 | 173 | 176 | 170 | 158 | 152 |
| 593.23 | 560 | 646 | 781 | 988  | 771 | 893  | 712 | 568 | 469 | 925.99 | 160 | 169 | 165 | 178 | 171 | 175 | 168 | 157 | 151 |
| 593.58 | 555 | 650 | 786 | 992  | 779 | 902  | 721 | 574 | 469 | 926.29 | 159 | 168 | 168 | 181 | 169 | 175 | 169 | 156 | 152 |
| 593.93 | 558 | 652 | 791 | 995  | 783 | 910  | 733 | 580 | 468 | 926.59 | 159 | 167 | 167 | 181 | 167 | 178 | 168 | 155 | 152 |
| 594.28 | 562 | 659 | 792 | 1001 | 794 | 920  | 748 | 581 | 469 | 926.89 | 164 | 171 | 170 | 183 | 168 | 178 | 168 | 157 | 154 |
| 594.62 | 565 | 670 | 801 | 1013 | 805 | 928  | 752 | 582 | 468 | 927.18 | 166 | 171 | 166 | 182 | 171 | 179 | 165 | 158 | 155 |
| 594.97 | 569 | 678 | 813 | 1026 | 810 | 939  | 759 | 586 | 477 | 927.48 | 165 | 168 | 165 | 179 | 170 | 178 | 163 | 159 | 154 |
| 595.32 | 570 | 684 | 819 | 1031 | 816 | 944  | 763 | 593 | 483 | 927.78 | 164 | 165 | 163 | 179 | 170 | 179 | 162 | 159 | 151 |
| 595.67 | 576 | 691 | 827 | 1041 | 819 | 956  | 785 | 600 | 488 | 928.08 | 161 | 162 | 164 | 174 | 166 | 175 | 161 | 157 | 147 |
| 596.01 | 571 | 695 | 823 | 1050 | 829 | 959  | 790 | 605 | 485 | 928.38 | 158 | 161 | 162 | 172 | 164 | 170 | 160 | 154 | 147 |
| 596.36 | 574 | 709 | 830 | 1061 | 842 | 958  | 799 | 613 | 491 | 928.68 | 157 | 159 | 160 | 171 | 164 | 168 | 160 | 152 | 148 |
| 596.71 | 569 | 713 | 832 | 1064 | 847 | 958  | 799 | 616 | 495 | 928.98 | 158 | 161 | 160 | 174 | 165 | 170 | 161 | 155 | 149 |
| 597.06 | 575 | 725 | 841 | 1070 | 852 | 964  | 804 | 626 | 497 | 929.28 | 158 | 160 | 159 | 174 | 167 | 171 | 162 | 154 | 148 |
| 597.41 | 574 | 727 | 845 | 1073 | 848 | 972  | 805 | 629 | 500 | 929.58 | 158 | 161 | 160 | 175 | 167 | 169 | 162 | 154 | 148 |
| 597.75 | 584 | 737 | 847 | 1082 | 856 | 977  | 807 | 642 | 502 | 929.88 | 157 | 161 | 161 | 174 | 165 | 166 | 164 | 152 | 147 |
| 598.1  | 574 | 738 | 848 | 1084 | 858 | 985  | 815 | 646 | 505 | 930.18 | 157 | 163 | 163 | 172 | 164 | 167 | 163 | 152 | 146 |
| 598.45 | 567 | 738 | 847 | 1085 | 865 | 987  | 814 | 642 | 498 | 930.48 | 157 | 163 | 164 | 173 | 164 | 170 | 164 | 153 | 148 |
| 598.8  | 561 | 737 | 847 | 1092 | 871 | 986  | 811 | 639 | 498 | 930.78 | 155 | 163 | 162 | 171 | 162 | 171 | 162 | 153 | 147 |
| 599.14 | 577 | 754 | 855 | 1108 | 894 | 993  | 828 | 654 | 511 | 931.08 | 154 | 161 | 160 | 171 | 160 | 167 | 163 | 153 | 147 |
| 599.49 | 583 | 762 | 857 | 1112 | 897 | 1002 | 839 | 666 | 513 | 931.37 | 155 | 160 | 160 | 171 | 160 | 165 | 163 | 151 | 146 |
| 599.84 | 584 | 768 | 856 | 1112 | 894 | 1006 | 852 | 671 | 516 | 931.67 | 156 | 158 | 157 | 173 | 164 | 164 | 163 | 152 | 147 |
| 600.18 | 573 | 761 | 856 | 1109 | 879 | 1001 | 845 | 668 | 507 | 931.97 | 157 | 157 | 156 | 173 | 167 | 167 | 164 | 154 | 149 |
| 600.53 | 573 | 760 | 861 | 1119 | 889 | 1016 | 841 | 672 | 509 | 932.27 | 155 | 159 | 154 | 172 | 167 | 166 | 162 | 155 | 148 |
| 600.88 | 577 | 769 | 880 | 1127 | 899 | 1023 | 848 | 672 | 510 | 932.57 | 156 | 159 | 158 | 171 | 164 | 167 | 163 | 157 | 148 |
| 601.23 | 581 | 772 | 880 | 1125 | 909 | 1030 | 855 | 674 | 513 | 932.87 | 158 | 164 | 162 | 169 | 165 | 169 | 164 | 158 | 149 |
| 601.57 | 583 | 781 | 878 | 1125 | 909 | 1020 | 863 | 678 | 512 | 933.17 | 159 | 161 | 162 | 167 | 162 | 168 | 162 | 155 | 149 |
| 601.92 | 582 | 779 | 874 | 1131 | 910 | 1032 | 867 | 685 | 512 | 933.47 | 155 | 159 | 159 | 164 | 161 | 165 | 159 | 151 | 147 |
| 602.27 | 588 | 787 | 881 | 1141 | 912 | 1042 | 874 | 688 | 516 | 933    |     |     |     |     |     |     |     |     |     |

|        |     |     |      |      |      |      |      |     |     |        |     |     |     |     |     |     |     |     |     |
|--------|-----|-----|------|------|------|------|------|-----|-----|--------|-----|-----|-----|-----|-----|-----|-----|-----|-----|
| 605.74 | 595 | 812 | 903  | 1171 | 933  | 1063 | 884  | 712 | 529 | 936.75 | 145 | 141 | 143 | 154 | 145 | 152 | 143 | 139 | 137 |
| 606.08 | 597 | 816 | 912  | 1179 | 943  | 1065 | 893  | 719 | 525 | 937.04 | 144 | 141 | 141 | 152 | 143 | 148 | 141 | 138 | 138 |
| 606.43 | 600 | 823 | 920  | 1186 | 949  | 1070 | 892  | 727 | 532 | 937.34 | 148 | 143 | 143 | 154 | 147 | 151 | 141 | 141 | 143 |
| 606.78 | 597 | 827 | 920  | 1183 | 953  | 1078 | 899  | 721 | 535 | 937.64 | 150 | 143 | 144 | 152 | 149 | 151 | 141 | 140 | 142 |
| 607.12 | 593 | 833 | 925  | 1181 | 953  | 1074 | 903  | 720 | 538 | 937.94 | 150 | 143 | 145 | 151 | 150 | 152 | 144 | 141 | 144 |
| 607.47 | 593 | 842 | 923  | 1179 | 946  | 1077 | 909  | 719 | 536 | 938.24 | 148 | 144 | 146 | 150 | 148 | 150 | 145 | 140 | 143 |
| 607.82 | 592 | 842 | 919  | 1184 | 952  | 1078 | 908  | 726 | 533 | 938.53 | 149 | 145 | 145 | 149 | 146 | 147 | 144 | 139 | 142 |
| 608.16 | 599 | 844 | 916  | 1188 | 950  | 1088 | 904  | 729 | 536 | 938.83 | 150 | 145 | 144 | 146 | 146 | 147 | 142 | 136 | 140 |
| 608.51 | 597 | 843 | 918  | 1188 | 956  | 1086 | 903  | 730 | 532 | 939.13 | 151 | 146 | 145 | 147 | 147 | 149 | 145 | 138 | 140 |
| 608.85 | 595 | 853 | 920  | 1190 | 953  | 1081 | 912  | 732 | 537 | 939.43 | 151 | 144 | 144 | 147 | 146 | 149 | 146 | 139 | 142 |
| 609.2  | 592 | 853 | 930  | 1193 | 957  | 1076 | 915  | 734 | 542 | 939.72 | 150 | 142 | 143 | 149 | 146 | 147 | 147 | 141 | 144 |
| 609.55 | 597 | 852 | 933  | 1200 | 960  | 1079 | 919  | 740 | 550 | 940.02 | 147 | 138 | 139 | 146 | 142 | 144 | 142 | 138 | 142 |
| 609.89 | 601 | 851 | 944  | 1199 | 973  | 1088 | 918  | 744 | 554 | 940.32 | 144 | 135 | 138 | 143 | 141 | 142 | 140 | 136 | 139 |
| 610.24 | 604 | 856 | 941  | 1197 | 979  | 1104 | 926  | 747 | 557 | 940.61 | 143 | 134 | 138 | 140 | 139 | 140 | 139 | 133 | 137 |
| 610.59 | 606 | 859 | 939  | 1205 | 979  | 1110 | 933  | 747 | 554 | 940.91 | 144 | 132 | 137 | 138 | 137 | 138 | 137 | 130 | 135 |
| 610.93 | 605 | 867 | 942  | 1214 | 982  | 1120 | 947  | 753 | 552 | 941.21 | 144 | 131 | 136 | 137 | 135 | 138 | 135 | 129 | 134 |
| 611.28 | 611 | 874 | 942  | 1224 | 985  | 1116 | 944  | 756 | 548 | 941.51 | 142 | 131 | 135 | 138 | 136 | 139 | 134 | 131 | 134 |
| 611.62 | 608 | 879 | 945  | 1224 | 990  | 1125 | 944  | 756 | 556 | 941.8  | 140 | 132 | 135 | 138 | 135 | 139 | 132 | 131 | 134 |
| 611.97 | 615 | 877 | 945  | 1224 | 990  | 1122 | 934  | 760 | 557 | 942.1  | 140 | 132 | 134 | 139 | 134 | 136 | 131 | 131 | 134 |
| 612.31 | 612 | 871 | 943  | 1215 | 983  | 1120 | 939  | 762 | 558 | 942.4  | 139 | 130 | 132 | 138 | 130 | 134 | 131 | 130 | 134 |
| 612.66 | 616 | 875 | 949  | 1214 | 989  | 1115 | 946  | 766 | 557 | 942.69 | 141 | 131 | 131 | 136 | 131 | 133 | 131 | 130 | 133 |
| 613.01 | 609 | 870 | 940  | 1208 | 973  | 1105 | 944  | 754 | 549 | 942.99 | 140 | 132 | 132 | 135 | 130 | 132 | 130 | 128 | 132 |
| 613.35 | 611 | 879 | 947  | 1217 | 985  | 1115 | 947  | 753 | 545 | 943.29 | 141 | 132 | 132 | 134 | 130 | 131 | 129 | 128 | 131 |
| 613.7  | 610 | 877 | 949  | 1221 | 982  | 1113 | 938  | 752 | 542 | 943.58 | 141 | 130 | 132 | 133 | 130 | 131 | 129 | 126 | 132 |
| 614.04 | 612 | 886 | 954  | 1227 | 991  | 1119 | 948  | 764 | 549 | 943.88 | 143 | 129 | 132 | 132 | 133 | 132 | 131 | 128 | 135 |
| 614.39 | 611 | 875 | 954  | 1230 | 994  | 1117 | 952  | 767 | 557 | 944.18 | 143 | 129 | 131 | 132 | 134 | 132 | 131 | 127 | 135 |
| 614.74 | 613 | 882 | 954  | 1235 | 998  | 1126 | 960  | 767 | 558 | 944.47 | 142 | 129 | 132 | 133 | 134 | 132 | 132 | 128 | 135 |
| 615.08 | 614 | 883 | 959  | 1234 | 998  | 1130 | 955  | 766 | 560 | 944.77 | 145 | 131 | 134 | 137 | 135 | 135 | 133 | 130 | 135 |
| 615.43 | 614 | 900 | 964  | 1240 | 997  | 1132 | 951  | 774 | 563 | 945.07 | 144 | 131 | 134 | 139 | 134 | 135 | 131 | 129 | 133 |
| 615.77 | 622 | 895 | 959  | 1229 | 1000 | 1128 | 956  | 785 | 564 | 945.36 | 145 | 133 | 135 | 139 | 133 | 135 | 133 | 130 | 134 |
| 616.12 | 626 | 899 | 965  | 1237 | 1010 | 1131 | 970  | 788 | 568 | 945.66 | 142 | 130 | 134 | 136 | 131 | 133 | 133 | 129 | 131 |
| 616.46 | 628 | 895 | 967  | 1242 | 1008 | 1135 | 974  | 786 | 564 | 945.96 | 143 | 132 | 134 | 136 | 134 | 135 | 134 | 131 | 133 |
| 616.81 | 619 | 899 | 974  | 1254 | 996  | 1140 | 968  | 785 | 566 | 946.25 | 144 | 131 | 132 | 135 | 134 | 134 | 135 | 133 | 133 |
| 617.15 | 621 | 897 | 972  | 1253 | 994  | 1143 | 968  | 791 | 555 | 946.55 | 145 | 132 | 132 | 136 | 136 | 136 | 136 | 134 | 134 |
| 617.5  | 619 | 896 | 966  | 1241 | 991  | 1146 | 978  | 791 | 554 | 946.84 | 145 | 131 | 133 | 137 | 137 | 136 | 136 | 133 | 135 |
| 617.84 | 621 | 901 | 964  | 1237 | 996  | 1142 | 982  | 785 | 554 | 947.14 | 143 | 132 | 134 | 137 | 139 | 137 | 135 | 132 | 136 |
| 618.19 | 618 | 900 | 958  | 1244 | 995  | 1138 | 978  | 784 | 558 | 947.44 | 142 | 130 | 133 | 134 | 135 | 133 | 132 | 129 | 133 |
| 618.53 | 622 | 907 | 964  | 1245 | 1000 | 1141 | 973  | 786 | 560 | 947.73 | 142 | 129 | 132 | 135 | 133 | 131 | 131 | 129 | 130 |
| 618.88 | 627 | 909 | 968  | 1258 | 1013 | 1160 | 979  | 794 | 563 | 948.03 | 143 | 127 | 132 | 136 | 130 | 131 | 130 | 128 | 129 |
| 619.22 | 633 | 914 | 977  | 1259 | 1017 | 1165 | 981  | 795 | 568 | 948.32 | 143 | 126 | 131 | 137 | 132 | 132 | 131 | 128 | 130 |
| 619.57 | 629 | 910 | 975  | 1268 | 1020 | 1159 | 986  | 798 | 565 | 948.62 | 140 | 126 | 129 | 135 | 131 | 133 | 131 | 128 | 129 |
| 619.91 | 626 | 912 | 983  | 1262 | 1023 | 1157 | 985  | 798 | 568 | 948.92 | 140 | 128 | 130 | 135 | 131 | 132 | 131 | 129 | 130 |
| 620.26 | 629 | 915 | 979  | 1265 | 1027 | 1158 | 987  | 798 | 569 | 949.21 | 139 | 130 | 131 | 136 | 130 | 130 | 131 | 129 | 130 |
| 620.6  | 630 | 917 | 982  | 1270 | 1039 | 1162 | 987  | 792 | 577 | 949.51 | 142 | 133 | 134 | 139 | 132 | 131 | 131 | 131 | 135 |
| 620.95 | 627 | 918 | 984  | 1272 | 1038 | 1164 | 988  | 792 | 578 | 949.8  | 145 | 135 | 135 | 140 | 133 | 133 | 132 | 131 | 137 |
| 621.29 | 621 | 923 | 994  | 1274 | 1041 | 1170 | 991  | 798 | 583 | 950.1  | 149 | 138 | 137 | 141 | 135 | 136 | 133 | 132 | 139 |
| 621.64 | 623 | 931 | 1002 | 1275 | 1033 | 1179 | 998  | 805 | 583 | 950.39 | 148 | 135 | 135 | 138 | 133 | 136 | 133 | 130 | 136 |
| 621.98 | 624 | 924 | 995  | 1279 | 1029 | 1175 | 999  | 805 | 581 | 950.69 | 142 | 132 | 131 | 134 | 131 | 133 | 130 | 127 | 131 |
| 622.33 | 630 | 921 | 994  | 1283 | 1030 | 1184 | 995  | 807 | 575 | 950.98 | 137 | 128 | 129 | 131 | 130 | 132 | 129 | 126 | 129 |
| 622.67 | 631 | 916 | 995  | 1276 | 1033 | 1183 | 990  | 809 | 571 | 951.28 | 139 | 128 | 131 | 132 | 131 | 133 | 130 | 128 | 130 |
| 623.02 | 634 | 926 | 1004 | 1276 | 1036 | 1187 | 994  | 809 | 569 | 951.57 | 144 | 130 | 134 | 134 | 134 | 135 | 132 | 131 | 134 |
| 623.36 | 634 | 932 | 1005 | 1265 | 1036 | 1173 | 1000 | 814 | 580 | 951.87 | 147 | 133 | 136 | 137 | 137 | 135 | 133 | 133 | 138 |
| 623.71 | 635 | 931 | 999  | 1270 | 1029 | 1165 | 1002 | 811 | 583 | 952.16 | 147 | 134 | 136 | 138 | 137 | 135 | 134 | 134 | 139 |
| 624.05 | 634 | 929 | 996  | 1269 | 1028 | 1153 | 1001 | 807 | 583 | 952.46 | 143 | 133 | 136 | 138 | 135 | 135 | 133 | 133 | 136 |
| 624.4  | 642 | 932 | 995  | 1276 | 1027 | 1166 | 1008 | 807 | 577 | 952.75 | 141 | 132 | 135 | 136 | 133 | 134 | 131 | 132 | 132 |
| 624.74 | 642 | 939 | 998  | 1277 | 1033 | 1171 | 1009 | 807 | 580 | 953.05 | 140 | 134 | 134 | 136 | 132 | 134 | 131 | 129 | 131 |
| 625.08 | 642 | 940 | 999  | 1280 | 1035 | 1172 | 1010 | 814 | 583 | 953.34 | 144 | 138 | 137 | 139 | 136 | 138 | 136 | 131 | 135 |
| 625.43 | 629 | 934 | 996  | 1278 | 1030 | 1167 | 997  | 814 | 581 | 953.64 | 147 | 139 | 139 | 143 | 136 | 141 | 140 | 132 | 137 |
| 625.77 | 629 | 936 | 1001 | 1281 | 1031 | 1173 | 996  | 823 | 580 | 953.93 | 145 | 136 | 139 | 143 | 137 | 140 | 139 | 131 | 136 |
| 626.12 | 632 | 942 | 1002 | 1273 | 1028 | 1179 | 989  | 823 | 576 | 954.23 | 142 | 133 | 136 | 140 | 134 | 137 | 133 | 128 | 133 |
| 626.46 | 634 | 943 | 998  | 1275 | 1028 | 1171 | 990  | 819 | 576 | 954.52 | 140 | 132 | 135 | 138 | 133 | 137 | 130 | 126 | 131 |
| 626.81 | 632 | 941 | 994  | 1269 | 1025 | 1170 | 985  | 819 | 573 | 954.82 | 143 | 136 | 138 | 139 | 137 | 138 | 134 | 130 | 131 |
| 627.15 | 630 | 936 | 991  | 1271 | 1031 | 1167 | 993  | 823 | 577 | 955.11 | 145 | 139 | 139 | 141 | 140 | 138 | 139 | 133 | 132 |
| 627.49 | 629 | 939 | 1000 | 1273 | 1033 | 1173 | 996  | 825 | 576 | 955.41 | 144 | 137 | 139 | 141 | 141 | 137 | 140 | 135 | 133 |
| 627.84 | 625 | 941 | 1002 | 1273 | 1037 | 1172 | 1001 | 820 | 575 | 955.7  | 142 | 136 | 137 | 141 | 137 | 138 | 137 | 135 | 134 |
| 628.18 | 627 | 945 | 1001 | 1269 | 1032 | 1175 | 994  | 820 | 573 | 955.99 | 139 | 132 | 134 | 138 | 134 | 135 | 133 | 131 | 133 |
| 628.53 | 625 | 940 | 994  | 1274 | 1031 | 1166 | 994  | 823 | 573 | 956.29 | 143 | 137 | 137 | 141 | 137 | 137 | 138 | 133 | 137 |
| 628.87 | 627 | 935 | 995  | 1284 | 1034 | 1174 | 1000 | 824 | 578 | 956.58 | 145 | 137 | 137 | 141 | 138 | 136 | 138 | 133 | 138 |
| 629.21 | 625 | 934 | 1001 | 1294 | 1038 | 1178 | 1007 | 825 | 586 | 956.88 | 148 | 139 | 139 | 142 | 140 | 139 | 139 | 136 | 140 |
| 629.56 | 624 | 936 | 1000 | 1288 | 1036 | 1182 | 1011 | 825 | 587 | 957.17 | 146 | 135 | 137 | 140 | 138 | 137 | 137 | 136 | 138 |
| 629.9  | 622 | 946 | 1001 | 1282 | 1028 | 1171 | 1014 | 823 | 583 | 957.47 | 145 | 138 | 142 | 142 | 140 | 141 | 139 | 139 | 140 |
| 630.25 | 622 | 941 | 994  | 1278 | 1024 | 1159 | 1006 | 818 | 573 | 957.76 |     |     |     |     |     |     |     |     |     |

|        |     |     |     |      |      |      |      |     |     |        |     |     |     |     |     |     |     |     |     |
|--------|-----|-----|-----|------|------|------|------|-----|-----|--------|-----|-----|-----|-----|-----|-----|-----|-----|-----|
| 634.02 | 618 | 934 | 991 | 1265 | 1027 | 1160 | 988  | 806 | 572 | 960.99 | 143 | 140 | 138 | 141 | 138 | 140 | 137 | 134 | 140 |
| 634.37 | 620 | 935 | 992 | 1267 | 1027 | 1161 | 988  | 810 | 570 | 961.28 | 142 | 139 | 136 | 136 | 139 | 138 | 136 | 131 | 138 |
| 634.71 | 624 | 935 | 998 | 1269 | 1023 | 1157 | 1001 | 810 | 571 | 961.58 | 145 | 141 | 138 | 138 | 143 | 142 | 139 | 130 | 138 |
| 635.05 | 623 | 932 | 979 | 1262 | 1023 | 1160 | 996  | 813 | 573 | 961.87 | 143 | 138 | 135 | 138 | 140 | 138 | 137 | 128 | 135 |
| 635.4  | 627 | 938 | 981 | 1262 | 1023 | 1160 | 999  | 824 | 577 | 962.16 | 144 | 138 | 137 | 141 | 140 | 139 | 140 | 131 | 137 |
| 635.74 | 628 | 936 | 983 | 1260 | 1024 | 1160 | 996  | 821 | 577 | 962.46 | 144 | 136 | 137 | 142 | 138 | 138 | 140 | 132 | 138 |
| 636.08 | 625 | 935 | 987 | 1258 | 1023 | 1162 | 998  | 820 | 572 | 962.75 | 146 | 138 | 141 | 145 | 140 | 141 | 143 | 135 | 141 |
| 636.43 | 625 | 932 | 982 | 1258 | 1024 | 1161 | 990  | 812 | 570 | 963.04 | 143 | 136 | 138 | 142 | 137 | 138 | 139 | 130 | 137 |
| 636.77 | 623 | 931 | 982 | 1262 | 1024 | 1168 | 992  | 816 | 571 | 963.33 | 142 | 135 | 136 | 140 | 137 | 137 | 138 | 130 | 135 |
| 637.11 | 622 | 929 | 986 | 1258 | 1024 | 1163 | 992  | 817 | 571 | 963.63 | 140 | 132 | 134 | 138 | 134 | 134 | 136 | 128 | 133 |
| 637.46 | 618 | 924 | 995 | 1259 | 1029 | 1163 | 996  | 819 | 570 | 963.92 | 140 | 135 | 137 | 141 | 135 | 136 | 138 | 132 | 133 |
| 637.8  | 623 | 929 | 996 | 1266 | 1032 | 1164 | 999  | 819 | 569 | 964.21 | 140 | 136 | 138 | 142 | 135 | 136 | 138 | 133 | 135 |
| 638.14 | 628 | 931 | 998 | 1274 | 1028 | 1163 | 997  | 816 | 570 | 964.51 | 144 | 140 | 142 | 145 | 139 | 139 | 142 | 137 | 137 |
| 638.48 | 626 | 931 | 983 | 1273 | 1024 | 1159 | 992  | 814 | 571 | 964.8  | 148 | 139 | 144 | 143 | 140 | 140 | 142 | 138 | 139 |
| 638.83 | 617 | 926 | 975 | 1266 | 1016 | 1154 | 983  | 810 | 568 | 965.09 | 149 | 138 | 144 | 144 | 139 | 138 | 142 | 137 | 140 |
| 639.17 | 614 | 920 | 972 | 1257 | 1016 | 1156 | 985  | 810 | 566 | 965.38 | 147 | 136 | 141 | 142 | 138 | 136 | 139 | 134 | 138 |
| 639.51 | 613 | 918 | 978 | 1253 | 1008 | 1152 | 981  | 803 | 563 | 965.68 | 146 | 136 | 140 | 143 | 139 | 136 | 139 | 133 | 137 |
| 639.85 | 606 | 913 | 983 | 1237 | 1012 | 1151 | 977  | 803 | 567 | 965.97 | 144 | 135 | 139 | 142 | 140 | 136 | 136 | 131 | 136 |
| 640.2  | 603 | 912 | 981 | 1240 | 1016 | 1143 | 972  | 801 | 565 | 966.26 | 145 | 135 | 138 | 143 | 140 | 137 | 135 | 130 | 135 |
| 640.54 | 605 | 914 | 983 | 1251 | 1028 | 1147 | 985  | 809 | 567 | 966.55 | 143 | 134 | 136 | 142 | 140 | 137 | 133 | 130 | 135 |
| 640.88 | 608 | 921 | 986 | 1260 | 1025 | 1148 | 989  | 814 | 566 | 966.85 | 142 | 135 | 136 | 144 | 139 | 138 | 134 | 133 | 137 |
| 641.22 | 612 | 928 | 991 | 1258 | 1020 | 1158 | 994  | 815 | 575 | 967.14 | 141 | 136 | 135 | 143 | 137 | 140 | 134 | 134 | 138 |
| 641.57 | 614 | 928 | 985 | 1244 | 1012 | 1155 | 982  | 808 | 570 | 967.43 | 142 | 136 | 135 | 143 | 135 | 140 | 135 | 133 | 138 |
| 641.91 | 614 | 927 | 979 | 1249 | 1016 | 1150 | 982  | 807 | 566 | 967.72 | 143 | 133 | 135 | 142 | 136 | 140 | 136 | 131 | 136 |
| 642.25 | 609 | 928 | 976 | 1251 | 1012 | 1145 | 983  | 807 | 562 | 968.01 | 143 | 133 | 136 | 141 | 138 | 137 | 134 | 131 | 134 |
| 642.59 | 605 | 924 | 979 | 1251 | 1004 | 1148 | 987  | 809 | 563 | 968.31 | 147 | 137 | 138 | 142 | 142 | 138 | 138 | 134 | 138 |
| 642.94 | 609 | 924 | 981 | 1248 | 1003 | 1150 | 989  | 803 | 560 | 968.6  | 148 | 137 | 137 | 141 | 143 | 136 | 137 | 134 | 137 |
| 643.28 | 611 | 919 | 986 | 1246 | 1002 | 1141 | 987  | 803 | 554 | 968.89 | 149 | 134 | 137 | 140 | 141 | 135 | 137 | 134 | 135 |
| 643.62 | 609 | 921 | 988 | 1246 | 1010 | 1144 | 984  | 800 | 551 | 969.18 | 147 | 130 | 136 | 139 | 139 | 134 | 135 | 133 | 132 |
| 643.96 | 605 | 921 | 988 | 1231 | 1007 | 1143 | 974  | 804 | 558 | 969.47 | 145 | 129 | 135 | 136 | 137 | 134 | 133 | 132 | 132 |
| 644.3  | 596 | 914 | 986 | 1226 | 1009 | 1151 | 970  | 803 | 558 | 969.76 | 142 | 131 | 134 | 137 | 135 | 133 | 131 | 130 | 133 |
| 644.65 | 600 | 914 | 982 | 1220 | 1000 | 1141 | 971  | 805 | 560 | 970.06 | 143 | 133 | 135 | 140 | 135 | 134 | 134 | 131 | 134 |
| 644.99 | 608 | 911 | 980 | 1231 | 1004 | 1151 | 980  | 803 | 561 | 970.35 | 141 | 132 | 135 | 140 | 133 | 135 | 134 | 130 | 133 |
| 645.33 | 620 | 918 | 973 | 1225 | 996  | 1152 | 981  | 805 | 564 | 970.64 | 142 | 131 | 138 | 141 | 134 | 137 | 138 | 134 | 136 |
| 645.67 | 619 | 917 | 971 | 1230 | 1006 | 1154 | 979  | 803 | 560 | 970.93 | 140 | 129 | 135 | 137 | 132 | 135 | 135 | 132 | 136 |
| 646.01 | 621 | 920 | 966 | 1228 | 998  | 1141 | 986  | 806 | 561 | 971.22 | 144 | 132 | 137 | 142 | 137 | 136 | 138 | 134 | 139 |
| 646.36 | 614 | 914 | 970 | 1237 | 999  | 1135 | 979  | 802 | 554 | 971.51 | 148 | 135 | 139 | 144 | 140 | 138 | 140 | 134 | 140 |
| 646.7  | 610 | 917 | 971 | 1236 | 992  | 1131 | 981  | 803 | 558 | 971.81 | 150 | 137 | 142 | 144 | 140 | 142 | 142 | 135 | 141 |
| 647.04 | 604 | 919 | 971 | 1239 | 992  | 1131 | 968  | 803 | 555 | 972.1  | 150 | 139 | 143 | 144 | 140 | 144 | 141 | 138 | 142 |
| 647.38 | 603 | 928 | 966 | 1230 | 999  | 1135 | 974  | 805 | 563 | 972.39 | 149 | 140 | 142 | 145 | 141 | 144 | 139 | 139 | 142 |
| 647.72 | 606 | 927 | 965 | 1227 | 1002 | 1132 | 979  | 809 | 561 | 972.68 | 148 | 141 | 142 | 146 | 142 | 143 | 136 | 139 | 142 |
| 648.07 | 602 | 918 | 965 | 1225 | 1007 | 1129 | 980  | 801 | 555 | 972.97 | 150 | 141 | 142 | 146 | 142 | 143 | 137 | 139 | 142 |
| 648.41 | 601 | 910 | 961 | 1229 | 998  | 1127 | 974  | 796 | 552 | 973.26 | 151 | 141 | 142 | 147 | 143 | 143 | 141 | 139 | 140 |
| 648.75 | 595 | 904 | 958 | 1225 | 992  | 1130 | 962  | 785 | 546 | 973.55 | 150 | 141 | 142 | 147 | 143 | 142 | 142 | 139 | 139 |
| 649.09 | 594 | 913 | 958 | 1229 | 988  | 1136 | 966  | 783 | 548 | 973.84 | 145 | 138 | 139 | 144 | 140 | 140 | 138 | 136 | 138 |
| 649.43 | 598 | 912 | 963 | 1225 | 990  | 1132 | 974  | 789 | 548 | 974.13 | 143 | 139 | 139 | 143 | 138 | 140 | 136 | 135 | 139 |
| 649.77 | 604 | 921 | 965 | 1234 | 987  | 1134 | 972  | 795 | 551 | 974.42 | 143 | 137 | 137 | 140 | 136 | 139 | 134 | 132 | 138 |
| 650.11 | 600 | 905 | 960 | 1230 | 988  | 1133 | 964  | 794 | 552 | 974.71 | 147 | 138 | 139 | 142 | 138 | 140 | 137 | 133 | 138 |
| 650.46 | 596 | 911 | 954 | 1238 | 995  | 1141 | 960  | 790 | 552 | 975.01 | 147 | 136 | 137 | 143 | 137 | 139 | 136 | 132 | 137 |
| 650.8  | 588 | 903 | 946 | 1228 | 1000 | 1133 | 959  | 788 | 553 | 975.3  | 146 | 135 | 138 | 145 | 139 | 139 | 136 | 133 | 136 |
| 651.14 | 596 | 910 | 946 | 1225 | 999  | 1126 | 958  | 789 | 552 | 975.59 | 144 | 134 | 137 | 142 | 137 | 137 | 134 | 132 | 133 |
| 651.48 | 592 | 904 | 945 | 1211 | 989  | 1117 | 955  | 786 | 543 | 975.88 | 142 | 136 | 136 | 140 | 134 | 136 | 133 | 131 | 133 |
| 651.82 | 596 | 900 | 953 | 1212 | 989  | 1116 | 956  | 786 | 541 | 976.17 | 143 | 136 | 136 | 139 | 132 | 137 | 132 | 130 | 135 |
| 652.16 | 587 | 897 | 952 | 1202 | 991  | 1114 | 958  | 791 | 541 | 976.46 | 144 | 139 | 138 | 141 | 134 | 137 | 133 | 130 | 139 |
| 652.5  | 593 | 903 | 956 | 1217 | 1003 | 1116 | 961  | 795 | 549 | 976.75 | 142 | 136 | 137 | 141 | 135 | 133 | 133 | 129 | 139 |
| 652.84 | 597 | 908 | 958 | 1220 | 1009 | 1124 | 966  | 791 | 554 | 977.04 | 144 | 137 | 137 | 144 | 136 | 134 | 136 | 131 | 139 |
| 653.18 | 605 | 918 | 961 | 1234 | 1014 | 1130 | 967  | 787 | 553 | 977.33 | 140 | 133 | 132 | 140 | 135 | 133 | 135 | 130 | 134 |
| 653.53 | 603 | 919 | 960 | 1224 | 1001 | 1131 | 967  | 785 | 549 | 977.62 | 142 | 132 | 135 | 139 | 136 | 135 | 136 | 131 | 136 |
| 653.87 | 594 | 916 | 952 | 1225 | 990  | 1126 | 967  | 785 | 544 | 977.91 | 143 | 133 | 138 | 138 | 137 | 136 | 135 | 131 | 137 |
| 654.21 | 589 | 909 | 951 | 1221 | 981  | 1120 | 970  | 780 | 546 | 978.2  | 146 | 136 | 140 | 140 | 135 | 136 | 136 | 131 | 138 |
| 654.55 | 590 | 902 | 952 | 1223 | 988  | 1120 | 966  | 780 | 547 | 978.49 | 145 | 136 | 138 | 140 | 135 | 135 | 135 | 131 | 137 |
| 654.89 | 596 | 902 | 953 | 1224 | 991  | 1121 | 962  | 783 | 552 | 978.78 | 143 | 135 | 135 | 138 | 134 | 132 | 133 | 131 | 136 |
| 655.23 | 595 | 907 | 949 | 1225 | 990  | 1120 | 961  | 789 | 549 | 979.07 | 143 | 135 | 136 | 137 | 134 | 133 | 133 | 132 | 137 |
| 655.57 | 594 | 911 | 953 | 1228 | 993  | 1121 | 964  | 796 | 548 | 979.36 | 145 | 136 | 137 | 137 | 134 | 134 | 134 | 133 | 137 |
| 655.91 | 592 | 918 | 963 | 1222 | 996  | 1118 | 968  | 796 | 545 | 979.65 | 145 | 136 | 137 | 137 | 135 | 133 | 132 | 132 | 137 |
| 656.25 | 591 | 907 | 971 | 1220 | 996  | 1118 | 961  | 798 | 548 | 979.94 | 143 | 136 | 135 | 137 | 136 | 132 | 132 | 132 | 138 |
| 656.59 | 590 | 905 | 976 | 1219 | 1001 | 1114 | 965  | 793 | 553 | 980.23 | 142 | 135 | 134 | 140 | 135 | 131 | 132 | 132 | 137 |
| 656.93 | 591 | 906 | 969 | 1218 | 999  | 1118 | 961  | 799 | 551 | 980.52 | 143 | 136 | 136 | 142 | 136 | 135 | 135 | 135 | 138 |
| 657.27 | 593 | 911 | 971 | 1216 | 1000 | 1120 | 962  | 794 | 552 | 980.81 | 142 | 135 | 137 | 142 | 137 | 138 | 136 | 137 | 135 |
| 657.61 | 589 | 906 | 960 | 1207 | 994  | 1123 | 954  | 792 | 554 | 981.1  | 139 | 134 | 136 | 138 | 135 | 140 | 135 | 135 | 134 |
| 657.95 | 590 | 900 | 957 | 1209 | 993  | 1120 | 957  | 793 | 553 | 981.39 | 138 | 132 | 135 | 136 | 133 | 136 | 134 | 132 | 131 |
| 658.29 | 591 | 905 | 948 | 1209 | 996  | 1115 | 958  | 795 | 555 | 981.67 | 142 | 133 |     |     |     |     |     |     |     |

|        |     |     |     |      |     |      |     |     |     |         |     |     |     |     |     |     |     |     |     |
|--------|-----|-----|-----|------|-----|------|-----|-----|-----|---------|-----|-----|-----|-----|-----|-----|-----|-----|-----|
| 662.04 | 588 | 920 | 952 | 1219 | 989 | 1120 | 956 | 799 | 544 | 984.85  | 141 | 130 | 133 | 135 | 133 | 134 | 132 | 125 | 133 |
| 662.38 | 582 | 921 | 955 | 1219 | 987 | 1122 | 963 | 798 | 548 | 985.14  | 140 | 130 | 133 | 135 | 129 | 134 | 130 | 126 | 131 |
| 662.71 | 580 | 907 | 942 | 1214 | 978 | 1109 | 951 | 789 | 538 | 985.43  | 141 | 132 | 133 | 136 | 129 | 135 | 130 | 128 | 134 |
| 663.05 | 581 | 909 | 953 | 1216 | 981 | 1098 | 958 | 786 | 538 | 985.72  | 139 | 130 | 131 | 133 | 127 | 130 | 129 | 125 | 134 |
| 663.39 | 581 | 898 | 941 | 1202 | 980 | 1087 | 947 | 777 | 528 | 986.01  | 136 | 127 | 129 | 129 | 125 | 125 | 126 | 122 | 131 |
| 663.73 | 589 | 907 | 957 | 1200 | 990 | 1095 | 949 | 789 | 537 | 986.3   | 138 | 129 | 132 | 132 | 128 | 128 | 128 | 124 | 131 |
| 664.07 | 588 | 900 | 941 | 1195 | 985 | 1100 | 942 | 785 | 535 | 986.58  | 139 | 129 | 132 | 132 | 130 | 130 | 129 | 127 | 132 |
| 664.41 | 591 | 907 | 946 | 1205 | 994 | 1111 | 956 | 788 | 541 | 986.87  | 143 | 134 | 134 | 135 | 134 | 135 | 133 | 131 | 135 |
| 664.75 | 587 | 913 | 938 | 1203 | 987 | 1116 | 963 | 783 | 539 | 987.16  | 143 | 133 | 132 | 134 | 134 | 135 | 133 | 130 | 134 |
| 665.09 | 586 | 915 | 943 | 1202 | 987 | 1121 | 965 | 785 | 542 | 987.45  | 145 | 133 | 135 | 136 | 134 | 135 | 135 | 130 | 136 |
| 665.43 | 580 | 916 | 950 | 1195 | 981 | 1124 | 958 | 785 | 542 | 987.74  | 143 | 130 | 133 | 134 | 131 | 132 | 133 | 128 | 135 |
| 665.77 | 581 | 908 | 955 | 1199 | 980 | 1119 | 953 | 787 | 544 | 988.03  | 144 | 130 | 132 | 132 | 130 | 131 | 133 | 129 | 136 |
| 666.11 | 581 | 904 | 950 | 1203 | 977 | 1113 | 956 | 782 | 540 | 988.31  | 144 | 132 | 131 | 132 | 131 | 133 | 132 | 129 | 136 |
| 666.45 | 587 | 901 | 944 | 1208 | 983 | 1113 | 956 | 788 | 541 | 988.6   | 144 | 134 | 132 | 133 | 130 | 134 | 133 | 130 | 136 |
| 666.79 | 584 | 900 | 938 | 1204 | 985 | 1109 | 953 | 781 | 532 | 988.89  | 142 | 134 | 133 | 134 | 131 | 134 | 133 | 132 | 137 |
| 667.13 | 584 | 900 | 940 | 1200 | 984 | 1108 | 947 | 783 | 537 | 989.18  | 139 | 132 | 130 | 133 | 129 | 131 | 132 | 131 | 135 |
| 667.47 | 586 | 900 | 944 | 1200 | 978 | 1102 | 944 | 779 | 538 | 989.47  | 142 | 132 | 132 | 135 | 133 | 133 | 134 | 134 | 137 |
| 667.81 | 594 | 898 | 942 | 1199 | 981 | 1101 | 944 | 787 | 544 | 989.75  | 143 | 131 | 130 | 134 | 133 | 133 | 134 | 133 | 135 |
| 668.15 | 592 | 897 | 938 | 1193 | 986 | 1098 | 942 | 786 | 539 | 990.04  | 147 | 134 | 132 | 138 | 136 | 136 | 136 | 135 | 137 |
| 668.49 | 590 | 894 | 932 | 1191 | 990 | 1099 | 945 | 787 | 538 | 990.33  | 146 | 133 | 132 | 139 | 133 | 134 | 136 | 132 | 135 |
| 668.82 | 581 | 894 | 940 | 1193 | 988 | 1102 | 949 | 784 | 535 | 990.62  | 145 | 133 | 135 | 141 | 134 | 133 | 135 | 131 | 135 |
| 669.16 | 573 | 887 | 948 | 1191 | 985 | 1104 | 952 | 779 | 539 | 990.9   | 141 | 129 | 135 | 138 | 133 | 130 | 133 | 127 | 133 |
| 669.5  | 575 | 895 | 949 | 1196 | 980 | 1105 | 953 | 780 | 538 | 991.19  | 143 | 129 | 133 | 136 | 134 | 131 | 132 | 128 | 134 |
| 669.84 | 578 | 903 | 946 | 1197 | 978 | 1099 | 954 | 773 | 539 | 991.48  | 143 | 127 | 130 | 135 | 134 | 131 | 131 | 127 | 134 |
| 670.18 | 589 | 906 | 940 | 1201 | 978 | 1092 | 953 | 780 | 536 | 991.77  | 144 | 130 | 130 | 136 | 136 | 133 | 133 | 130 | 136 |
| 670.52 | 581 | 903 | 937 | 1190 | 972 | 1090 | 952 | 773 | 536 | 992.05  | 143 | 128 | 130 | 135 | 134 | 130 | 131 | 129 | 135 |
| 670.86 | 579 | 892 | 936 | 1188 | 973 | 1097 | 950 | 776 | 536 | 992.34  | 143 | 129 | 132 | 134 | 133 | 130 | 131 | 130 | 136 |
| 671.2  | 574 | 901 | 933 | 1188 | 972 | 1105 | 944 | 778 | 535 | 992.63  | 143 | 128 | 131 | 134 | 131 | 132 | 129 | 129 | 138 |
| 671.53 | 572 | 894 | 937 | 1190 | 979 | 1101 | 940 | 781 | 531 | 992.91  | 142 | 129 | 132 | 134 | 130 | 133 | 130 | 130 | 139 |
| 671.87 | 573 | 899 | 940 | 1188 | 978 | 1094 | 946 | 786 | 530 | 993.2   | 141 | 130 | 132 | 134 | 130 | 132 | 130 | 130 | 137 |
| 672.21 | 577 | 900 | 941 | 1197 | 980 | 1105 | 956 | 785 | 538 | 993.49  | 144 | 137 | 140 | 140 | 137 | 137 | 137 | 137 | 141 |
| 672.55 | 580 | 903 | 937 | 1194 | 972 | 1104 | 953 | 782 | 537 | 993.78  | 146 | 140 | 142 | 143 | 140 | 141 | 140 | 139 | 142 |
| 672.89 | 579 | 904 | 931 | 1195 | 968 | 1104 | 953 | 780 | 536 | 994.06  | 147 | 140 | 142 | 144 | 140 | 141 | 141 | 138 | 142 |
| 673.23 | 576 | 902 | 933 | 1188 | 966 | 1092 | 952 | 779 | 531 | 994.35  | 141 | 133 | 132 | 137 | 131 | 134 | 133 | 130 | 134 |
| 673.57 | 577 | 901 | 933 | 1192 | 965 | 1096 | 957 | 780 | 534 | 994.64  | 139 | 129 | 129 | 133 | 126 | 130 | 129 | 127 | 131 |
| 673.9  | 576 | 897 | 937 | 1194 | 966 | 1096 | 949 | 781 | 536 | 994.92  | 138 | 128 | 128 | 130 | 124 | 129 | 128 | 127 | 131 |
| 674.24 | 577 | 891 | 933 | 1191 | 967 | 1096 | 951 | 781 | 537 | 995.21  | 140 | 125 | 129 | 129 | 126 | 127 | 128 | 128 | 132 |
| 674.58 | 579 | 887 | 929 | 1187 | 966 | 1094 | 945 | 778 | 537 | 995.5   | 141 | 123 | 128 | 129 | 127 | 127 | 128 | 126 | 131 |
| 674.92 | 580 | 890 | 932 | 1187 | 966 | 1093 | 948 | 777 | 533 | 995.78  | 141 | 122 | 126 | 128 | 126 | 126 | 126 | 124 | 129 |
| 675.26 | 584 | 890 | 933 | 1183 | 964 | 1086 | 942 | 776 | 531 | 996.07  | 141 | 124 | 127 | 131 | 127 | 127 | 127 | 123 | 131 |
| 675.6  | 583 | 894 | 937 | 1185 | 972 | 1086 | 944 | 783 | 530 | 996.35  | 146 | 130 | 129 | 137 | 131 | 132 | 130 | 127 | 135 |
| 675.93 | 584 | 895 | 932 | 1186 | 976 | 1087 | 936 | 782 | 533 | 996.64  | 148 | 136 | 132 | 140 | 134 | 135 | 133 | 132 | 138 |
| 676.27 | 578 | 893 | 929 | 1184 | 972 | 1096 | 940 | 779 | 531 | 996.93  | 147 | 136 | 132 | 138 | 134 | 135 | 133 | 133 | 136 |
| 676.61 | 576 | 887 | 925 | 1186 | 966 | 1097 | 940 | 775 | 531 | 997.21  | 145 | 135 | 132 | 135 | 132 | 134 | 134 | 133 | 135 |
| 676.95 | 566 | 881 | 921 | 1182 | 958 | 1096 | 942 | 773 | 528 | 997.5   | 143 | 131 | 130 | 133 | 130 | 133 | 134 | 131 | 133 |
| 677.29 | 563 | 881 | 927 | 1183 | 954 | 1085 | 937 | 773 | 525 | 997.79  | 144 | 131 | 129 | 132 | 130 | 133 | 133 | 129 | 134 |
| 677.62 | 565 | 882 | 924 | 1176 | 951 | 1076 | 932 | 774 | 530 | 998.07  | 140 | 126 | 126 | 130 | 130 | 129 | 128 | 125 | 131 |
| 677.96 | 569 | 880 | 923 | 1171 | 953 | 1078 | 932 | 778 | 530 | 998.36  | 140 | 127 | 127 | 132 | 133 | 128 | 128 | 124 | 131 |
| 678.3  | 571 | 881 | 920 | 1164 | 955 | 1077 | 929 | 771 | 530 | 998.64  | 140 | 128 | 128 | 133 | 134 | 129 | 130 | 126 | 132 |
| 678.64 | 567 | 883 | 923 | 1172 | 963 | 1086 | 929 | 771 | 530 | 998.93  | 140 | 129 | 129 | 134 | 132 | 129 | 130 | 125 | 133 |
| 678.98 | 572 | 890 | 921 | 1176 | 966 | 1085 | 931 | 761 | 528 | 999.22  | 139 | 128 | 128 | 132 | 129 | 127 | 130 | 123 | 134 |
| 679.31 | 577 | 888 | 926 | 1187 | 969 | 1087 | 933 | 772 | 529 | 999.5   | 138 | 125 | 125 | 129 | 126 | 122 | 128 | 119 | 132 |
| 679.65 | 579 | 894 | 925 | 1180 | 967 | 1086 | 937 | 769 | 529 | 999.79  | 139 | 125 | 125 | 127 | 125 | 122 | 129 | 120 | 132 |
| 679.99 | 572 | 880 | 927 | 1171 | 958 | 1075 | 927 | 770 | 523 | 1000.07 | 139 | 125 | 125 | 127 | 125 | 123 | 128 | 122 | 131 |
| 680.33 | 566 | 883 | 926 | 1165 | 963 | 1080 | 930 | 777 | 522 | 1000.36 | 139 | 126 | 125 | 128 | 126 | 124 | 129 | 124 | 132 |
| 680.66 | 564 | 872 | 920 | 1168 | 958 | 1072 | 928 | 779 | 514 | 1000.64 | 137 | 126 | 124 | 127 | 126 | 124 | 127 | 122 | 130 |
| 681    | 566 | 882 | 914 | 1168 | 963 | 1083 | 926 | 784 | 514 | 1000.93 | 137 | 128 | 126 | 127 | 128 | 124 | 127 | 123 | 130 |
| 681.34 | 568 | 879 | 903 | 1164 | 948 | 1073 | 920 | 768 | 513 | 1001.21 | 135 | 129 | 127 | 126 | 128 | 123 | 126 | 121 | 128 |
| 681.68 | 569 | 879 | 902 | 1154 | 937 | 1069 | 915 | 760 | 511 | 1001.5  | 137 | 131 | 129 | 128 | 130 | 126 | 130 | 124 | 131 |
| 682.01 | 573 | 879 | 908 | 1163 | 935 | 1061 | 925 | 756 | 515 | 1001.79 | 138 | 129 | 127 | 131 | 131 | 127 | 131 | 124 | 133 |
| 682.35 | 575 | 873 | 913 | 1158 | 939 | 1059 | 921 | 758 | 517 | 1002.07 | 142 | 131 | 130 | 134 | 133 | 132 | 133 | 128 | 137 |
| 682.69 | 568 | 875 | 926 | 1160 | 945 | 1062 | 923 | 759 | 521 | 1002.36 | 143 | 130 | 130 | 133 | 130 | 133 | 131 | 127 | 135 |
| 683.02 | 562 | 871 | 926 | 1148 | 941 | 1054 | 914 | 758 | 524 | 1002.64 | 143 | 129 | 131 | 133 | 128 | 134 | 130 | 128 | 134 |
| 683.36 | 557 | 876 | 922 | 1150 | 946 | 1061 | 919 | 752 | 525 | 1002.93 | 143 | 128 | 130 | 134 | 128 | 133 | 131 | 128 | 132 |
| 683.7  | 561 | 875 | 911 | 1142 | 946 | 1056 | 921 | 757 | 521 | 1003.21 | 143 | 129 | 131 | 136 | 132 | 134 | 133 | 130 | 134 |
| 684.04 | 563 | 877 | 910 | 1142 | 947 | 1054 | 920 | 759 | 513 | 1003.5  | 143 | 129 | 131 | 136 | 135 | 134 | 135 | 129 | 135 |
| 684.37 | 566 | 870 | 913 | 1145 | 937 | 1040 | 920 | 766 | 511 | 1003.78 | 143 | 128 | 130 | 132 | 134 | 133 | 133 | 128 | 136 |
| 684.71 | 565 | 865 | 906 | 1146 | 933 | 1036 | 917 | 760 | 510 | 1004.07 | 142 | 125 | 129 | 129 | 131 | 132 | 130 | 126 | 134 |
| 685.05 | 565 | 857 | 900 | 1140 | 931 | 1035 | 919 | 758 | 513 | 1004.35 | 141 | 123 | 127 | 128 | 129 | 131 | 129 | 125 | 134 |
| 685.38 | 560 | 855 | 898 | 1123 | 925 | 1040 | 907 | 752 | 511 | 1004.64 | 139 | 124 | 127 | 129 | 127 | 129 | 127 | 124 | 133 |
| 685.72 | 556 | 862 | 901 | 1122 | 925 | 1039 | 905 | 753 | 513 | 1004.92 | 140 | 125 | 127 | 130 | 128 | 128 | 126 | 124 | 134 |
| 686.06 | 549 | 871 | 894 | 1122 | 922 | 1042 | 901 | 751 | 515 | 1005.2  | 142 | 127 | 129 | 134 | 130 | 130 |     |     |     |

|        |     |     |     |      |     |      |     |     |     |         |     |     |     |     |     |     |     |     |     |
|--------|-----|-----|-----|------|-----|------|-----|-----|-----|---------|-----|-----|-----|-----|-----|-----|-----|-----|-----|
| 689.76 | 544 | 851 | 883 | 1119 | 905 | 1027 | 908 | 752 | 501 | 1008.33 | 139 | 126 | 128 | 128 | 124 | 127 | 128 | 122 | 132 |
| 690.1  | 548 | 852 | 888 | 1114 | 905 | 1036 | 902 | 752 | 503 | 1008.61 | 137 | 127 | 125 | 127 | 123 | 126 | 126 | 122 | 131 |
| 690.43 | 545 | 848 | 881 | 1100 | 905 | 1029 | 895 | 745 | 504 | 1008.9  | 134 | 126 | 122 | 126 | 124 | 126 | 124 | 121 | 131 |
| 690.77 | 541 | 840 | 874 | 1096 | 906 | 1022 | 887 | 736 | 496 | 1009.18 | 136 | 128 | 122 | 129 | 125 | 125 | 127 | 122 | 133 |
| 691.11 | 532 | 840 | 865 | 1095 | 901 | 1016 | 885 | 734 | 495 | 1009.47 | 139 | 128 | 124 | 130 | 126 | 125 | 128 | 124 | 134 |
| 691.44 | 532 | 840 | 856 | 1101 | 897 | 1009 | 879 | 732 | 492 | 1009.75 | 141 | 128 | 125 | 131 | 126 | 125 | 129 | 124 | 133 |
| 691.78 | 530 | 845 | 856 | 1100 | 891 | 1006 | 877 | 732 | 503 | 1010.03 | 139 | 126 | 125 | 130 | 126 | 125 | 127 | 121 | 133 |
| 692.11 | 532 | 837 | 856 | 1090 | 893 | 1001 | 868 | 725 | 501 | 1010.32 | 137 | 124 | 126 | 129 | 123 | 126 | 127 | 119 | 133 |
| 692.45 | 539 | 838 | 857 | 1082 | 899 | 999  | 865 | 725 | 502 | 1010.6  | 137 | 124 | 127 | 128 | 123 | 126 | 127 | 120 | 133 |
| 692.79 | 541 | 839 | 859 | 1080 | 904 | 997  | 862 | 724 | 493 | 1010.88 | 140 | 126 | 129 | 129 | 124 | 129 | 129 | 124 | 133 |
| 693.12 | 539 | 837 | 854 | 1078 | 892 | 999  | 862 | 728 | 489 | 1011.17 | 140 | 127 | 128 | 129 | 125 | 129 | 129 | 125 | 132 |
| 693.46 | 531 | 829 | 851 | 1071 | 882 | 997  | 863 | 726 | 486 | 1011.45 | 141 | 127 | 130 | 130 | 127 | 130 | 129 | 125 | 132 |
| 693.79 | 530 | 821 | 852 | 1066 | 875 | 998  | 863 | 726 | 486 | 1011.73 | 139 | 126 | 128 | 129 | 127 | 129 | 128 | 123 | 132 |
| 694.13 | 531 | 824 | 853 | 1067 | 882 | 989  | 872 | 724 | 488 | 1012.02 | 139 | 127 | 127 | 128 | 127 | 128 | 127 | 122 | 131 |
| 694.46 | 527 | 824 | 856 | 1063 | 881 | 986  | 868 | 721 | 489 | 1012.3  | 138 | 126 | 125 | 127 | 126 | 125 | 126 | 121 | 131 |
| 694.8  | 526 | 824 | 848 | 1061 | 879 | 983  | 859 | 719 | 487 | 1012.58 | 136 | 126 | 125 | 127 | 126 | 124 | 125 | 121 | 130 |
| 695.14 | 526 | 824 | 844 | 1058 | 880 | 985  | 856 | 716 | 486 | 1012.87 | 134 | 124 | 124 | 125 | 125 | 122 | 123 | 120 | 129 |
| 695.47 | 533 | 824 | 847 | 1060 | 885 | 995  | 856 | 717 | 486 | 1013.15 | 134 | 122 | 125 | 124 | 123 | 121 | 122 | 120 | 128 |
| 695.81 | 530 | 820 | 849 | 1058 | 876 | 995  | 860 | 714 | 490 | 1013.43 | 137 | 122 | 127 | 125 | 122 | 122 | 123 | 123 | 130 |
| 696.14 | 528 | 811 | 851 | 1059 | 867 | 998  | 856 | 716 | 489 | 1013.71 | 136 | 120 | 124 | 124 | 121 | 123 | 122 | 122 | 129 |
| 696.48 | 522 | 804 | 840 | 1051 | 856 | 985  | 858 | 710 | 486 | 1014    | 135 | 119 | 120 | 124 | 120 | 122 | 120 | 119 | 129 |
| 696.81 | 523 | 800 | 839 | 1054 | 863 | 982  | 852 | 706 | 484 | 1014.28 | 133 | 119 | 119 | 121 | 120 | 118 | 117 | 116 | 127 |
| 697.15 | 519 | 797 | 836 | 1048 | 857 | 966  | 845 | 697 | 478 | 1014.56 | 134 | 123 | 122 | 122 | 123 | 120 | 120 | 118 | 127 |
| 697.48 | 522 | 801 | 837 | 1052 | 865 | 961  | 847 | 698 | 482 | 1014.85 | 133 | 124 | 123 | 122 | 123 | 121 | 121 | 118 | 128 |
| 697.82 | 522 | 806 | 834 | 1038 | 862 | 955  | 844 | 698 | 479 | 1015.13 | 135 | 125 | 123 | 123 | 123 | 123 | 123 | 120 | 130 |
| 698.15 | 521 | 812 | 832 | 1038 | 868 | 960  | 842 | 700 | 481 | 1015.41 | 138 | 124 | 122 | 125 | 124 | 123 | 123 | 120 | 132 |
| 698.49 | 518 | 803 | 831 | 1032 | 855 | 959  | 831 | 694 | 469 | 1015.69 | 139 | 121 | 122 | 125 | 125 | 124 | 124 | 120 | 131 |
| 698.83 | 519 | 799 | 829 | 1028 | 845 | 953  | 829 | 695 | 469 | 1015.98 | 137 | 119 | 123 | 125 | 124 | 124 | 123 | 119 | 129 |
| 699.16 | 522 | 793 | 828 | 1028 | 840 | 948  | 831 | 695 | 472 | 1016.26 | 134 | 119 | 123 | 125 | 123 | 123 | 122 | 117 | 128 |
| 699.5  | 525 | 793 | 822 | 1029 | 848 | 947  | 830 | 701 | 483 | 1016.54 | 137 | 125 | 126 | 130 | 126 | 127 | 126 | 120 | 132 |
| 699.83 | 521 | 785 | 814 | 1030 | 843 | 950  | 831 | 700 | 481 | 1016.82 | 138 | 129 | 127 | 131 | 128 | 129 | 128 | 122 | 135 |
| 700.17 | 515 | 788 | 810 | 1027 | 848 | 953  | 833 | 699 | 483 | 1017.1  | 137 | 129 | 127 | 131 | 128 | 129 | 128 | 124 | 137 |
| 700.5  | 512 | 794 | 812 | 1021 | 843 | 952  | 836 | 692 | 472 | 1017.39 | 138 | 127 | 128 | 130 | 130 | 128 | 128 | 126 | 136 |
| 700.84 | 512 | 792 | 811 | 1015 | 844 | 952  | 834 | 684 | 468 | 1017.67 | 138 | 125 | 127 | 128 | 129 | 128 | 128 | 127 | 133 |
| 701.17 | 514 | 784 | 807 | 1007 | 836 | 943  | 822 | 682 | 462 | 1017.95 | 141 | 127 | 129 | 131 | 132 | 131 | 131 | 128 | 134 |
| 701.51 | 506 | 775 | 799 | 1007 | 830 | 937  | 816 | 678 | 462 | 1018.23 | 139 | 125 | 126 | 130 | 129 | 129 | 130 | 124 | 132 |
| 701.84 | 505 | 777 | 804 | 1008 | 826 | 929  | 811 | 681 | 466 | 1018.51 | 138 | 125 | 125 | 130 | 128 | 127 | 127 | 119 | 133 |
| 702.17 | 500 | 777 | 806 | 1003 | 821 | 929  | 813 | 680 | 461 | 1018.8  | 138 | 123 | 123 | 127 | 126 | 124 | 125 | 116 | 133 |
| 702.51 | 501 | 773 | 800 | 1002 | 821 | 925  | 803 | 679 | 460 | 1019.08 | 136 | 120 | 122 | 124 | 123 | 121 | 122 | 113 | 130 |
