# Supplementary material for: Sparse Representation for Different Animal Vertebra Classification along the Fixation Trajectory of Pedicle Screw
Source: Hindawi journal article supplement (doi:10.1155/2020/2521696), 2020-01-20
Supplement: f1 [file 2521696.f1.zip › 2521696.f1/3A+3B.pdf]

|        |     |     |     |     |     |     |     |     |     |        |     |     |     |     |      |      |      |      |     |
|--------|-----|-----|-----|-----|-----|-----|-----|-----|-----|--------|-----|-----|-----|-----|------|------|------|------|-----|
| 339.99 | 0   | 0   | 0   | 0   | 0   | 0   | 0   | 0   | 0   | 702.84 | 430 | 953 | 952 | 860 | 1148 | 1148 | 1138 | 1269 | 450 |
| 340.36 | 136 | 120 | 121 | 123 | 122 | 122 | 123 | 125 | 132 | 703.18 | 429 | 956 | 949 | 862 | 1139 | 1139 | 1141 | 1265 | 450 |
| 340.73 | 134 | 119 | 119 | 120 | 122 | 122 | 121 | 119 | 133 | 703.51 | 439 | 962 | 948 | 863 | 1148 | 1148 | 1151 | 1254 | 456 |
| 341.1  | 139 | 121 | 120 | 120 | 126 | 126 | 124 | 121 | 134 | 703.85 | 437 | 958 | 942 | 859 | 1142 | 1142 | 1144 | 1250 | 454 |
| 341.48 | 136 | 122 | 122 | 121 | 127 | 127 | 125 | 124 | 135 | 704.18 | 437 | 954 | 944 | 864 | 1143 | 1143 | 1142 | 1245 | 456 |
| 341.85 | 135 | 120 | 121 | 120 | 127 | 127 | 125 | 127 | 135 | 704.52 | 422 | 944 | 942 | 860 | 1130 | 1130 | 1136 | 1241 | 449 |
| 342.22 | 134 | 119 | 117 | 122 | 127 | 127 | 124 | 122 | 137 | 704.85 | 420 | 949 | 944 | 863 | 1131 | 1131 | 1142 | 1241 | 452 |
| 342.59 | 138 | 120 | 116 | 121 | 126 | 126 | 125 | 125 | 139 | 705.19 | 422 | 952 | 940 | 854 | 1124 | 1124 | 1132 | 1243 | 450 |
| 342.96 | 132 | 115 | 118 | 116 | 120 | 120 | 124 | 122 | 132 | 705.52 | 429 | 943 | 939 | 857 | 1125 | 1125 | 1133 | 1243 | 453 |
| 343.34 | 139 | 121 | 127 | 127 | 126 | 126 | 132 | 125 | 135 | 705.85 | 431 | 930 | 931 | 850 | 1117 | 1117 | 1123 | 1236 | 449 |
| 343.71 | 129 | 117 | 122 | 115 | 124 | 124 | 123 | 122 | 130 | 706.19 | 429 | 927 | 930 | 852 | 1118 | 1118 | 1125 | 1237 | 444 |
| 344.08 | 139 | 127 | 123 | 120 | 127 | 127 | 128 | 125 | 137 | 706.52 | 426 | 928 | 929 | 853 | 1115 | 1115 | 1118 | 1238 | 441 |
| 344.45 | 138 | 126 | 121 | 126 | 125 | 125 | 126 | 125 | 135 | 706.86 | 424 | 925 | 929 | 851 | 1116 | 1116 | 1105 | 1235 | 439 |
| 344.82 | 137 | 123 | 121 | 122 | 124 | 124 | 123 | 124 | 132 | 707.19 | 417 | 925 | 915 | 843 | 1102 | 1102 | 1094 | 1227 | 438 |
| 345.19 | 137 | 122 | 117 | 119 | 123 | 123 | 122 | 122 | 131 | 707.52 | 415 | 929 | 916 | 836 | 1098 | 1098 | 1098 | 1221 | 438 |
| 345.57 | 143 | 128 | 128 | 127 | 128 | 128 | 129 | 128 | 139 | 707.86 | 416 | 931 | 914 | 830 | 1093 | 1093 | 1103 | 1216 | 444 |
| 345.94 | 138 | 121 | 122 | 119 | 123 | 123 | 122 | 123 | 138 | 708.19 | 417 | 923 | 916 | 831 | 1095 | 1095 | 1111 | 1215 | 445 |
| 346.31 | 139 | 123 | 124 | 123 | 127 | 127 | 125 | 128 | 139 | 708.53 | 419 | 908 | 916 | 830 | 1098 | 1098 | 1100 | 1213 | 443 |
| 346.68 | 139 | 124 | 124 | 124 | 129 | 129 | 126 | 129 | 139 | 708.86 | 417 | 908 | 914 | 827 | 1095 | 1095 | 1090 | 1214 | 436 |
| 347.05 | 138 | 126 | 126 | 124 | 131 | 131 | 126 | 128 | 140 | 709.19 | 420 | 909 | 915 | 819 | 1092 | 1092 | 1080 | 1210 | 437 |
| 347.42 | 137 | 126 | 126 | 122 | 128 | 128 | 126 | 126 | 139 | 709.53 | 417 | 911 | 899 | 814 | 1078 | 1078 | 1075 | 1197 | 435 |
| 347.8  | 136 | 126 | 127 | 122 | 127 | 127 | 128 | 127 | 139 | 709.86 | 414 | 907 | 902 | 819 | 1078 | 1078 | 1083 | 1192 | 437 |
| 348.17 | 136 | 127 | 128 | 124 | 126 | 126 | 129 | 127 | 138 | 710.19 | 414 | 905 | 904 | 824 | 1078 | 1078 | 1081 | 1194 | 435 |
| 348.54 | 133 | 125 | 126 | 121 | 125 | 125 | 128 | 124 | 134 | 710.53 | 417 | 907 | 913 | 833 | 1083 | 1083 | 1085 | 1201 | 433 |
| 348.91 | 130 | 123 | 124 | 119 | 122 | 122 | 126 | 122 | 131 | 710.86 | 416 | 903 | 906 | 832 | 1084 | 1084 | 1077 | 1197 | 431 |
| 349.28 | 130 | 124 | 124 | 120 | 121 | 121 | 124 | 124 | 133 | 711.2  | 413 | 896 | 896 | 828 | 1081 | 1081 | 1069 | 1181 | 431 |
| 349.65 | 135 | 126 | 126 | 127 | 126 | 126 | 126 | 129 | 140 | 711.53 | 407 | 897 | 887 | 815 | 1080 | 1080 | 1071 | 1183 | 436 |
| 350.03 | 138 | 128 | 127 | 131 | 130 | 130 | 128 | 131 | 144 | 711.86 | 407 | 890 | 884 | 812 | 1061 | 1061 | 1071 | 1176 | 435 |
| 350.4  | 138 | 127 | 125 | 129 | 131 | 131 | 129 | 129 | 143 | 712.2  | 405 | 886 | 885 | 815 | 1060 | 1060 | 1073 | 1174 | 429 |
| 350.77 | 136 | 126 | 122 | 125 | 128 | 128 | 128 | 126 | 139 | 712.53 | 409 | 883 | 885 | 820 | 1053 | 1053 | 1063 | 1167 | 425 |
| 351.14 | 136 | 123 | 122 | 123 | 128 | 128 | 127 | 125 | 136 | 712.86 | 409 | 882 | 883 | 815 | 1057 | 1057 | 1060 | 1170 | 421 |
| 351.51 | 139 | 123 | 123 | 124 | 128 | 128 | 126 | 127 | 136 | 713.2  | 416 | 891 | 882 | 809 | 1062 | 1062 | 1061 | 1181 | 423 |
| 351.88 | 137 | 122 | 124 | 126 | 128 | 128 | 126 | 127 | 137 | 713.53 | 414 | 885 | 877 | 795 | 1061 | 1061 | 1055 | 1177 | 423 |
| 352.25 | 137 | 123 | 125 | 127 | 128 | 128 | 126 | 127 | 137 | 713.86 | 410 | 887 | 874 | 793 | 1064 | 1064 | 1054 | 1176 | 426 |
| 352.62 | 135 | 122 | 124 | 126 | 125 | 125 | 126 | 125 | 134 | 714.2  | 403 | 874 | 870 | 783 | 1044 | 1044 | 1040 | 1161 | 422 |
| 353    | 134 | 122 | 122 | 124 | 123 | 123 | 124 | 125 | 133 | 714.53 | 401 | 869 | 869 | 786 | 1040 | 1040 | 1039 | 1150 | 414 |
| 353.37 | 134 | 121 | 121 | 122 | 122 | 122 | 122 | 125 | 134 | 714.86 | 404 | 867 | 870 | 785 | 1031 | 1031 | 1031 | 1144 | 413 |
| 353.74 | 134 | 123 | 123 | 124 | 124 | 124 | 123 | 125 | 136 | 715.19 | 406 | 868 | 866 | 792 | 1036 | 1036 | 1035 | 1146 | 420 |
| 354.11 | 137 | 125 | 128 | 126 | 126 | 126 | 125 | 126 | 136 | 715.53 | 401 | 871 | 861 | 790 | 1040 | 1040 | 1032 | 1148 | 424 |
| 354.48 | 139 | 126 | 129 | 127 | 127 | 127 | 127 | 126 | 135 | 715.86 | 399 | 871 | 859 | 792 | 1039 | 1039 | 1038 | 1147 | 425 |
| 354.85 | 141 | 126 | 128 | 127 | 127 | 127 | 128 | 127 | 135 | 716.19 | 399 | 868 | 858 | 782 | 1033 | 1033 | 1030 | 1147 | 422 |
| 355.22 | 140 | 125 | 126 | 126 | 127 | 127 | 128 | 128 | 135 | 716.53 | 401 | 860 | 857 | 779 | 1020 | 1020 | 1029 | 1144 | 417 |
| 355.59 | 140 | 124 | 126 | 126 | 128 | 128 | 128 | 128 | 135 | 716.86 | 400 | 856 | 853 | 775 | 1020 | 1020 | 1024 | 1137 | 409 |
| 355.96 | 137 | 124 | 127 | 125 | 129 | 129 | 128 | 129 | 136 | 717.19 | 393 | 848 | 850 | 776 | 1014 | 1014 | 1031 | 1131 | 408 |
| 356.34 | 136 | 123 | 125 | 125 | 129 | 129 | 128 | 129 | 137 | 717.52 | 393 | 849 | 849 | 770 | 1012 | 1012 | 1026 | 1122 | 409 |
| 356.71 | 137 | 124 | 126 | 125 | 130 | 130 | 129 | 129 | 139 | 717.86 | 390 | 836 | 844 | 757 | 1001 | 1001 | 1013 | 1110 | 410 |
| 357.08 | 139 | 124 | 127 | 125 | 131 | 131 | 130 | 129 | 141 | 718.19 | 393 | 837 | 843 | 752 | 1003 | 1003 | 1004 | 1104 | 403 |
| 357.45 | 138 | 123 | 127 | 124 | 128 | 128 | 129 | 127 | 140 | 718.52 | 389 | 837 | 840 | 754 | 994  | 994  | 1002 | 1100 | 402 |
| 357.82 | 136 | 120 | 126 | 125 | 124 | 124 | 128 | 125 | 139 | 718.85 | 390 | 833 | 834 | 758 | 988  | 988  | 1001 | 1098 | 400 |
| 358.19 | 138 | 121 | 125 | 126 | 124 | 124 | 127 | 126 | 138 | 719.19 | 387 | 831 | 826 | 756 | 982  | 982  | 995  | 1088 | 403 |
| 358.56 | 139 | 121 | 125 | 125 | 125 | 125 | 125 | 126 | 138 | 719.52 | 385 | 825 | 819 | 755 | 983  | 983  | 989  | 1084 | 401 |
| 358.93 | 139 | 122 | 124 | 124 | 126 | 126 | 124 | 126 | 137 | 719.85 | 382 | 829 | 813 | 757 | 988  | 988  | 989  | 1085 | 403 |
| 359.3  | 137 | 122 | 123 | 122 | 125 | 125 | 124 | 124 | 134 | 720.18 | 382 | 816 | 814 | 752 | 982  | 982  | 986  | 1081 | 398 |
| 359.67 | 138 | 127 | 125 | 124 | 129 | 129 | 128 | 129 | 137 | 720.52 | 380 | 814 | 816 | 743 | 974  | 974  | 976  | 1085 | 402 |
| 360.04 | 140 | 130 | 127 | 126 | 132 | 132 | 130 | 131 | 139 | 720.85 | 379 | 807 | 815 | 731 | 962  | 962  | 972  | 1076 | 396 |
| 360.41 | 138 | 130 | 129 | 127 | 133 | 133 | 131 | 132 | 141 | 721.18 | 377 | 810 | 807 | 728 | 963  | 963  | 967  | 1071 | 400 |
| 360.78 | 137 | 126 | 127 | 127 | 129 | 129 | 129 | 128 | 139 | 721.51 | 380 | 802 | 800 | 728 | 964  | 964  | 965  | 1055 | 395 |
| 361.15 | 134 | 123 | 124 | 126 | 125 | 125 | 127 | 126 | 136 | 721.84 | 379 | 801 | 796 | 728 | 963  | 963  | 955  | 1053 | 396 |
| 361.53 | 135 | 124 | 124 | 127 | 125 | 125 | 127 | 126 | 136 | 722.18 | 378 | 793 | 796 | 728 | 953  | 953  | 949  | 1055 | 395 |
| 361.9  | 136 | 123 | 124 | 125 | 126 | 126 | 128 | 126 | 135 | 722.51 | 378 | 794 | 794 | 727 | 953  | 953  | 948  | 1053 | 395 |
| 362.27 | 138 | 125 | 126 | 125 | 128 | 128 | 129 | 127 | 136 | 722.84 | 378 | 789 | 794 | 723 | 950  | 950  | 945  | 1049 | 397 |
| 362.64 | 138 | 122 | 125 | 122 | 126 | 126 | 126 | 124 | 134 | 723.17 | 380 | 796 | 791 | 721 | 954  | 954  | 945  | 1046 | 395 |
| 363.01 | 139 | 123 | 125 | 121 | 126 | 126 | 126 | 124 | 137 | 723.5  | 377 | 797 | 794 | 722 | 948  | 948  | 946  | 1054 | 392 |
| 363.38 | 137 | 121 | 123 | 122 | 124 | 124 | 125 | 125 | 136 | 723.84 | 377 | 797 | 792 | 727 | 949  | 949  | 946  | 1055 | 387 |
| 363.75 | 136 | 119 | 121 | 123 | 124 | 124 | 125 | 126 | 136 | 724.17 | 377 | 793 | 798 | 726 | 944  | 944  | 946  | 1057 | 393 |
| 364.12 | 137 | 119 | 121 | 123 | 124 | 124 | 126 | 127 | 135 | 724.5  | 374 | 790 | 792 | 718 | 945  | 945  | 947  | 1050 | 392 |
| 364.49 | 137 | 120 | 123 | 122 | 126 | 126 | 127 | 126 | 137 | 724.83 | 377 | 788 | 798 | 713 | 947  | 947  | 946  | 1046 | 396 |
| 364.86 | 136 | 123 | 127 | 121 | 127 | 127 | 126 | 126 | 137 | 725.16 | 376 | 786 | 789 | 712 | 942  | 942  | 943  | 1037 | 391 |
| 365.23 | 132 | 123 | 127 | 121 | 127 | 127 | 124 | 125 | 136 | 725.49 | 378 | 783 | 789 | 715 | 930  | 930  | 939  | 1031 | 390 |
| 365.6  | 132 | 124 | 125 | 122 | 126 | 126 | 123 | 124 | 136 | 725.83 | 374 | 789 | 789 | 720 | 923  | 923  | 943  | 1030 | 388 |
| 365.97 | 134 | 126 | 123 | 123 | 128 | 128 | 126 | 125 | 136 | 726.16 | 378 | 784 | 785 | 721 | 926  | 926  | 944  | 1034 | 388 |
| 366.34 | 140 | 129 | 126 | 126 | 132 | 132 | 131 | 131 | 140 | 726.49 | 376 | 7   |     |     |      |      |      |      |     |

|        |     |     |     |     |     |     |     |     |     |        |     |     |     |     |     |     |     |      |     |
|--------|-----|-----|-----|-----|-----|-----|-----|-----|-----|--------|-----|-----|-----|-----|-----|-----|-----|------|-----|
| 370.41 | 136 | 128 | 128 | 128 | 129 | 129 | 128 | 126 | 136 | 730.13 | 375 | 780 | 765 | 715 | 913 | 913 | 930 | 1031 | 385 |
| 370.78 | 137 | 131 | 130 | 130 | 131 | 131 | 128 | 126 | 135 | 730.46 | 377 | 772 | 774 | 712 | 913 | 913 | 933 | 1031 | 393 |
| 371.15 | 135 | 128 | 127 | 127 | 128 | 128 | 126 | 124 | 134 | 730.79 | 375 | 773 | 774 | 707 | 916 | 916 | 926 | 1031 | 390 |
| 371.52 | 137 | 127 | 127 | 126 | 127 | 127 | 126 | 125 | 135 | 731.13 | 367 | 772 | 780 | 707 | 914 | 914 | 923 | 1025 | 389 |
| 371.89 | 137 | 124 | 125 | 125 | 124 | 124 | 126 | 125 | 136 | 731.46 | 363 | 778 | 779 | 711 | 916 | 916 | 927 | 1031 | 390 |
| 372.26 | 138 | 124 | 127 | 126 | 127 | 127 | 128 | 127 | 137 | 731.79 | 359 | 773 | 770 | 705 | 915 | 915 | 931 | 1024 | 384 |
| 372.63 | 136 | 126 | 127 | 125 | 128 | 128 | 129 | 129 | 136 | 732.12 | 364 | 770 | 768 | 701 | 919 | 919 | 927 | 1032 | 382 |
| 373    | 135 | 126 | 126 | 124 | 129 | 129 | 129 | 128 | 135 | 732.45 | 368 | 770 | 762 | 699 | 918 | 918 | 926 | 1021 | 377 |
| 373.37 | 135 | 124 | 124 | 123 | 127 | 127 | 127 | 126 | 134 | 732.78 | 369 | 768 | 765 | 703 | 921 | 921 | 925 | 1020 | 377 |
| 373.73 | 136 | 122 | 125 | 123 | 127 | 127 | 127 | 126 | 136 | 733.11 | 369 | 772 | 767 | 707 | 919 | 919 | 930 | 1010 | 375 |
| 374.1  | 140 | 123 | 128 | 125 | 131 | 131 | 128 | 129 | 138 | 733.44 | 367 | 771 | 769 | 706 | 920 | 920 | 926 | 1018 | 375 |
| 374.47 | 142 | 125 | 130 | 126 | 133 | 133 | 128 | 131 | 141 | 733.77 | 365 | 771 | 763 | 700 | 915 | 915 | 923 | 1016 | 379 |
| 374.84 | 143 | 128 | 130 | 128 | 135 | 135 | 130 | 132 | 143 | 734.1  | 361 | 766 | 762 | 696 | 913 | 913 | 919 | 1016 | 380 |
| 375.21 | 139 | 127 | 127 | 127 | 130 | 130 | 128 | 129 | 142 | 734.43 | 358 | 767 | 764 | 695 | 908 | 908 | 919 | 1008 | 381 |
| 375.58 | 138 | 127 | 127 | 127 | 129 | 129 | 129 | 129 | 142 | 734.76 | 360 | 770 | 769 | 700 | 904 | 904 | 919 | 1011 | 379 |
| 375.95 | 136 | 128 | 126 | 125 | 129 | 129 | 129 | 127 | 140 | 735.09 | 360 | 766 | 762 | 697 | 898 | 898 | 922 | 1006 | 378 |
| 376.32 | 137 | 129 | 128 | 125 | 131 | 131 | 129 | 128 | 141 | 735.42 | 362 | 770 | 761 | 694 | 899 | 899 | 916 | 1006 | 376 |
| 376.69 | 139 | 129 | 128 | 126 | 130 | 130 | 128 | 127 | 139 | 735.75 | 364 | 771 | 755 | 692 | 900 | 900 | 912 | 1002 | 378 |
| 377.06 | 140 | 128 | 128 | 128 | 130 | 130 | 127 | 127 | 140 | 736.08 | 371 | 774 | 764 | 702 | 909 | 909 | 911 | 1007 | 381 |
| 377.43 | 140 | 127 | 127 | 129 | 130 | 130 | 127 | 128 | 139 | 736.41 | 371 | 769 | 760 | 707 | 905 | 905 | 915 | 1006 | 386 |
| 377.8  | 136 | 126 | 126 | 128 | 129 | 129 | 127 | 129 | 138 | 736.74 | 372 | 765 | 769 | 707 | 908 | 908 | 922 | 1011 | 389 |
| 378.17 | 134 | 125 | 126 | 127 | 127 | 127 | 130 | 130 | 136 | 737.07 | 366 | 761 | 765 | 701 | 903 | 903 | 918 | 1011 | 386 |
| 378.54 | 134 | 126 | 126 | 126 | 126 | 126 | 131 | 129 | 134 | 737.4  | 366 | 758 | 762 | 696 | 908 | 908 | 917 | 1012 | 381 |
| 378.9  | 137 | 127 | 129 | 127 | 128 | 128 | 132 | 128 | 134 | 737.73 | 362 | 758 | 757 | 697 | 909 | 909 | 907 | 1005 | 377 |
| 379.27 | 138 | 128 | 129 | 127 | 129 | 129 | 131 | 128 | 134 | 738.06 | 363 | 756 | 754 | 696 | 906 | 906 | 898 | 1003 | 379 |
| 379.64 | 139 | 127 | 127 | 125 | 129 | 129 | 132 | 127 | 134 | 738.39 | 362 | 758 | 761 | 697 | 909 | 909 | 896 | 1001 | 376 |
| 380.01 | 140 | 127 | 126 | 126 | 131 | 131 | 134 | 129 | 137 | 738.72 | 363 | 753 | 768 | 697 | 903 | 903 | 902 | 1005 | 380 |
| 380.38 | 142 | 128 | 127 | 126 | 132 | 132 | 135 | 131 | 139 | 739.05 | 364 | 759 | 766 | 696 | 901 | 901 | 911 | 1001 | 382 |
| 380.75 | 141 | 128 | 127 | 126 | 131 | 131 | 133 | 131 | 139 | 739.38 | 359 | 761 | 759 | 697 | 892 | 892 | 912 | 993  | 383 |
| 381.12 | 140 | 127 | 125 | 122 | 127 | 127 | 129 | 127 | 135 | 739.71 | 361 | 763 | 750 | 693 | 898 | 898 | 910 | 991  | 383 |
| 381.49 | 138 | 128 | 124 | 122 | 126 | 126 | 127 | 127 | 135 | 740.04 | 357 | 758 | 755 | 695 | 895 | 895 | 909 | 994  | 380 |
| 381.86 | 139 | 129 | 125 | 123 | 128 | 128 | 127 | 127 | 136 | 740.37 | 361 | 759 | 759 | 692 | 899 | 899 | 903 | 999  | 382 |
| 382.22 | 137 | 129 | 127 | 127 | 130 | 130 | 128 | 127 | 136 | 740.7  | 359 | 759 | 761 | 687 | 888 | 888 | 900 | 995  | 378 |
| 382.59 | 138 | 130 | 128 | 130 | 131 | 131 | 129 | 126 | 137 | 741.03 | 365 | 766 | 766 | 691 | 897 | 897 | 903 | 995  | 380 |
| 382.96 | 137 | 130 | 127 | 129 | 129 | 129 | 127 | 124 | 136 | 741.36 | 363 | 756 | 763 | 699 | 893 | 893 | 906 | 993  | 378 |
| 383.33 | 139 | 132 | 128 | 129 | 132 | 132 | 129 | 126 | 140 | 741.69 | 369 | 755 | 764 | 707 | 899 | 899 | 906 | 1001 | 380 |
| 383.7  | 137 | 129 | 128 | 127 | 132 | 132 | 129 | 126 | 141 | 742.02 | 365 | 750 | 759 | 697 | 896 | 896 | 904 | 995  | 376 |
| 384.07 | 140 | 129 | 130 | 129 | 134 | 134 | 131 | 128 | 143 | 742.35 | 368 | 756 | 759 | 688 | 896 | 896 | 905 | 997  | 375 |
| 384.44 | 141 | 127 | 131 | 128 | 133 | 133 | 131 | 128 | 141 | 742.68 | 357 | 754 | 758 | 684 | 897 | 897 | 897 | 981  | 371 |
| 384.81 | 141 | 126 | 131 | 126 | 130 | 130 | 130 | 128 | 138 | 743    | 360 | 748 | 749 | 685 | 890 | 890 | 888 | 978  | 375 |
| 385.17 | 141 | 127 | 130 | 126 | 130 | 130 | 130 | 132 | 137 | 743.33 | 356 | 742 | 748 | 687 | 893 | 893 | 880 | 980  | 374 |
| 385.54 | 137 | 124 | 125 | 125 | 127 | 127 | 129 | 129 | 134 | 743.66 | 356 | 736 | 745 | 679 | 892 | 892 | 882 | 981  | 375 |
| 385.91 | 137 | 124 | 124 | 127 | 130 | 130 | 129 | 130 | 137 | 743.99 | 353 | 736 | 744 | 677 | 893 | 893 | 877 | 982  | 369 |
| 386.28 | 134 | 122 | 124 | 127 | 130 | 130 | 127 | 127 | 138 | 744.32 | 355 | 729 | 735 | 669 | 881 | 881 | 880 | 974  | 368 |
| 386.65 | 137 | 124 | 126 | 129 | 133 | 133 | 127 | 131 | 139 | 744.65 | 355 | 731 | 732 | 673 | 875 | 875 | 879 | 976  | 366 |
| 387.02 | 137 | 124 | 127 | 128 | 133 | 133 | 128 | 129 | 138 | 744.98 | 354 | 735 | 736 | 667 | 875 | 875 | 881 | 974  | 370 |
| 387.38 | 138 | 124 | 127 | 128 | 132 | 132 | 129 | 127 | 138 | 745.31 | 350 | 737 | 737 | 666 | 874 | 874 | 881 | 969  | 370 |
| 387.75 | 139 | 126 | 130 | 129 | 132 | 132 | 130 | 127 | 141 | 745.64 | 350 | 738 | 738 | 665 | 871 | 871 | 884 | 962  | 372 |
| 388.12 | 139 | 127 | 131 | 130 | 132 | 132 | 131 | 129 | 141 | 745.96 | 350 | 740 | 737 | 667 | 872 | 872 | 881 | 963  | 369 |
| 388.49 | 136 | 124 | 129 | 129 | 129 | 129 | 128 | 128 | 138 | 746.29 | 354 | 745 | 741 | 672 | 874 | 874 | 876 | 967  | 367 |
| 388.86 | 135 | 124 | 126 | 127 | 129 | 129 | 127 | 126 | 137 | 746.62 | 355 | 744 | 746 | 670 | 872 | 872 | 875 | 970  | 366 |
| 389.23 | 140 | 128 | 126 | 129 | 131 | 131 | 130 | 130 | 141 | 746.95 | 350 | 739 | 743 | 666 | 868 | 868 | 877 | 967  | 363 |
| 389.59 | 146 | 133 | 129 | 133 | 135 | 135 | 136 | 135 | 145 | 747.28 | 351 | 729 | 738 | 670 | 872 | 872 | 882 | 967  | 368 |
| 389.96 | 146 | 133 | 130 | 134 | 134 | 134 | 138 | 136 | 146 | 747.61 | 348 | 727 | 731 | 671 | 868 | 868 | 882 | 969  | 363 |
| 390.33 | 141 | 128 | 126 | 130 | 130 | 130 | 133 | 131 | 142 | 747.94 | 353 | 729 | 732 | 676 | 866 | 866 | 886 | 967  | 366 |
| 390.7  | 139 | 127 | 126 | 128 | 129 | 129 | 131 | 130 | 142 | 748.26 | 353 | 722 | 730 | 665 | 856 | 856 | 882 | 959  | 362 |
| 391.07 | 139 | 126 | 124 | 126 | 128 | 128 | 130 | 127 | 138 | 748.59 | 357 | 728 | 730 | 665 | 854 | 854 | 875 | 961  | 368 |
| 391.43 | 140 | 126 | 124 | 127 | 130 | 130 | 131 | 126 | 137 | 748.92 | 353 | 724 | 718 | 660 | 845 | 845 | 868 | 956  | 367 |
| 391.8  | 140 | 126 | 125 | 126 | 129 | 129 | 132 | 124 | 137 | 749.25 | 353 | 736 | 715 | 666 | 845 | 845 | 868 | 958  | 367 |
| 392.17 | 140 | 126 | 126 | 126 | 128 | 128 | 132 | 125 | 139 | 749.58 | 351 | 722 | 716 | 661 | 847 | 847 | 868 | 951  | 364 |
| 392.54 | 139 | 127 | 127 | 125 | 127 | 127 | 132 | 126 | 138 | 749.91 | 351 | 724 | 724 | 661 | 849 | 849 | 871 | 952  | 363 |
| 392.91 | 137 | 127 | 126 | 123 | 126 | 126 | 131 | 128 | 137 | 750.23 | 347 | 720 | 726 | 661 | 859 | 859 | 867 | 946  | 361 |
| 393.27 | 138 | 128 | 128 | 125 | 128 | 128 | 131 | 130 | 140 | 750.56 | 347 | 725 | 727 | 661 | 862 | 862 | 870 | 945  | 362 |
| 393.64 | 139 | 128 | 127 | 126 | 129 | 129 | 131 | 129 | 143 | 750.89 | 350 | 716 | 717 | 657 | 857 | 857 | 865 | 939  | 365 |
| 394.01 | 137 | 127 | 127 | 127 | 128 | 128 | 129 | 125 | 141 | 751.22 | 348 | 714 | 720 | 650 | 849 | 849 | 861 | 943  | 364 |
| 394.38 | 136 | 126 | 126 | 124 | 128 | 128 | 127 | 123 | 138 | 751.55 | 347 | 711 | 714 | 646 | 846 | 846 | 854 | 936  | 359 |
| 394.75 | 136 | 127 | 128 | 124 | 129 | 129 | 128 | 124 | 137 | 751.87 | 345 | 710 | 718 | 648 | 849 | 849 | 856 | 940  | 353 |
| 395.11 | 140 | 129 | 130 | 126 | 132 | 132 | 131 | 128 | 138 | 752.2  | 344 | 705 | 711 | 645 | 839 | 839 | 847 | 934  | 350 |
| 395.48 | 145 | 130 | 129 | 129 | 131 | 131 | 132 | 130 | 138 | 752.53 | 344 | 705 | 712 | 648 | 834 | 834 | 852 | 936  | 352 |
| 395.85 | 142 | 126 | 126 | 127 | 128 | 128 | 130 | 129 | 137 | 752.86 | 340 | 706 | 713 | 646 | 831 | 831 | 837 | 928  | 352 |
| 396.22 | 141 | 124 | 125 | 127 | 128 | 128 | 128 | 128 | 138 | 753.19 | 342 | 710 | 709 | 648 | 833 | 833 | 841 | 929  | 357 |
| 396.58 | 139 | 124 | 126 | 126 | 127 | 127 | 129 | 126 | 138 | 753.51 | 339 | 705 | 701 | 644 | 833 | 833 | 833 | 928  | 357 |
| 396.95 | 142 | 126 | 126 | 126 | 127 | 127 | 130 | 126 | 138 | 753.84 | 346 |     |     |     |     |     |     |      |     |

|        |     |     |     |     |     |     |     |     |     |        |     |     |     |     |       |     |     |     |     |
|--------|-----|-----|-----|-----|-----|-----|-----|-----|-----|--------|-----|-----|-----|-----|-------|-----|-----|-----|-----|
| 400.63 | 137 | 126 | 126 | 125 | 126 | 126 | 125 | 126 | 139 | 757.12 | 329 | 681 | 689 | 619 | 798   | 798 | 799 | 891 | 341 |
| 400.99 | 140 | 125 | 127 | 125 | 126 | 126 | 126 | 127 | 141 | 757.44 | 325 | 679 | 687 | 615 | 794   | 794 | 795 | 895 | 346 |
| 401.36 | 140 | 123 | 127 | 126 | 127 | 127 | 127 | 126 | 139 | 757.77 | 333 | 682 | 687 | 617 | 795   | 795 | 800 | 899 | 352 |
| 401.73 | 140 | 121 | 127 | 124 | 127 | 127 | 127 | 125 | 138 | 758.1  | 336 | 682 | 681 | 620 | 800   | 800 | 801 | 897 | 352 |
| 402.09 | 137 | 120 | 127 | 123 | 128 | 128 | 126 | 124 | 135 | 758.42 | 336 | 680 | 679 | 619 | 800   | 800 | 808 | 897 | 349 |
| 402.46 | 139 | 122 | 126 | 122 | 130 | 130 | 128 | 126 | 137 | 758.75 | 335 | 680 | 679 | 623 | 797   | 797 | 811 | 900 | 345 |
| 402.83 | 138 | 121 | 123 | 122 | 130 | 130 | 128 | 124 | 136 | 759.08 | 334 | 680 | 683 | 617 | 794   | 794 | 819 | 897 | 344 |
| 403.2  | 141 | 124 | 124 | 124 | 131 | 131 | 130 | 125 | 137 | 759.4  | 335 | 680 | 677 | 617 | 795   | 795 | 812 | 886 | 345 |
| 403.56 | 140 | 123 | 123 | 124 | 129 | 129 | 129 | 125 | 136 | 759.73 | 335 | 675 | 676 | 609 | 795   | 795 | 807 | 885 | 344 |
| 403.93 | 141 | 124 | 125 | 125 | 127 | 127 | 130 | 126 | 137 | 760.06 | 335 | 675 | 673 | 604 | 796   | 796 | 802 | 887 | 343 |
| 404.3  | 141 | 122 | 124 | 125 | 126 | 126 | 129 | 124 | 136 | 760.38 | 333 | 673 | 677 | 604 | 792   | 792 | 796 | 891 | 343 |
| 404.66 | 141 | 122 | 123 | 124 | 125 | 125 | 128 | 123 | 133 | 760.71 | 327 | 668 | 678 | 605 | 791   | 791 | 796 | 882 | 342 |
| 405.03 | 140 | 121 | 123 | 123 | 125 | 125 | 128 | 123 | 133 | 761.04 | 326 | 667 | 681 | 613 | 785   | 785 | 793 | 876 | 344 |
| 405.4  | 136 | 119 | 123 | 122 | 122 | 122 | 127 | 123 | 132 | 761.36 | 328 | 665 | 678 | 613 | 785   | 785 | 795 | 871 | 344 |
| 405.76 | 133 | 116 | 122 | 122 | 118 | 118 | 125 | 120 | 132 | 761.69 | 329 | 667 | 673 | 610 | 781   | 781 | 790 | 869 | 342 |
| 406.13 | 132 | 114 | 120 | 120 | 116 | 116 | 123 | 117 | 130 | 762.02 | 329 | 666 | 666 | 602 | 779   | 779 | 787 | 866 | 337 |
| 406.5  | 131 | 113 | 117 | 118 | 114 | 114 | 120 | 116 | 129 | 762.34 | 325 | 659 | 659 | 597 | 778   | 778 | 780 | 861 | 334 |
| 406.86 | 134 | 113 | 119 | 118 | 117 | 117 | 121 | 118 | 131 | 762.67 | 324 | 655 | 657 | 601 | 773   | 773 | 781 | 864 | 337 |
| 407.23 | 133 | 114 | 120 | 118 | 119 | 119 | 121 | 120 | 132 | 763    | 324 | 648 | 655 | 602 | 774   | 774 | 781 | 864 | 338 |
| 407.6  | 137 | 118 | 124 | 120 | 124 | 124 | 123 | 124 | 134 | 763.32 | 324 | 652 | 655 | 604 | 769   | 769 | 784 | 864 | 337 |
| 407.96 | 135 | 120 | 122 | 120 | 123 | 123 | 124 | 124 | 135 | 763.65 | 324 | 651 | 655 | 596 | 768   | 768 | 781 | 863 | 335 |
| 408.33 | 138 | 121 | 122 | 120 | 124 | 124 | 127 | 126 | 135 | 763.98 | 323 | 647 | 653 | 593 | 765   | 765 | 776 | 858 | 335 |
| 408.7  | 137 | 118 | 120 | 117 | 123 | 123 | 126 | 123 | 133 | 764.3  | 318 | 645 | 647 | 584 | 760   | 760 | 772 | 859 | 333 |
| 409.06 | 136 | 115 | 118 | 115 | 123 | 123 | 122 | 120 | 131 | 764.63 | 318 | 643 | 642 | 583 | 755   | 755 | 763 | 848 | 332 |
| 409.43 | 134 | 115 | 117 | 114 | 121 | 121 | 119 | 118 | 130 | 764.95 | 318 | 650 | 644 | 584 | 755   | 755 | 765 | 848 | 335 |
| 409.8  | 134 | 117 | 119 | 116 | 121 | 121 | 120 | 120 | 130 | 765.28 | 321 | 647 | 640 | 581 | 749   | 749 | 766 | 838 | 334 |
| 410.16 | 136 | 119 | 121 | 117 | 123 | 123 | 123 | 121 | 131 | 765.61 | 322 | 648 | 647 | 579 | 744   | 744 | 771 | 836 | 331 |
| 410.53 | 136 | 118 | 120 | 116 | 122 | 122 | 123 | 119 | 129 | 765.93 | 323 | 641 | 639 | 577 | 737   | 737 | 764 | 829 | 330 |
| 410.89 | 132 | 113 | 116 | 112 | 118 | 118 | 121 | 114 | 127 | 766.26 | 323 | 641 | 642 | 580 | 739   | 739 | 761 | 828 | 331 |
| 411.26 | 132 | 111 | 115 | 112 | 117 | 117 | 119 | 114 | 127 | 766.58 | 317 | 634 | 628 | 580 | 739   | 739 | 754 | 824 | 330 |
| 411.63 | 132 | 113 | 116 | 114 | 117 | 117 | 118 | 115 | 129 | 766.91 | 313 | 628 | 631 | 577 | 738   | 738 | 746 | 820 | 322 |
| 411.99 | 135 | 117 | 121 | 118 | 120 | 120 | 121 | 119 | 132 | 767.23 | 310 | 617 | 627 | 572 | 736   | 736 | 744 | 821 | 321 |
| 412.36 | 135 | 116 | 121 | 116 | 119 | 119 | 122 | 119 | 131 | 767.56 | 312 | 617 | 629 | 574 | 734   | 734 | 742 | 821 | 323 |
| 412.73 | 133 | 111 | 118 | 114 | 118 | 118 | 121 | 118 | 131 | 767.89 | 310 | 612 | 625 | 568 | 725   | 725 | 741 | 820 | 325 |
| 413.09 | 131 | 108 | 114 | 112 | 117 | 117 | 120 | 118 | 128 | 768.21 | 308 | 610 | 622 | 562 | 722   | 722 | 735 | 815 | 321 |
| 413.46 | 129 | 108 | 112 | 112 | 117 | 117 | 119 | 116 | 128 | 768.54 | 307 | 611 | 616 | 560 | 724   | 724 | 732 | 810 | 322 |
| 413.82 | 131 | 113 | 113 | 115 | 118 | 118 | 121 | 117 | 129 | 768.86 | 307 | 615 | 612 | 561 | 727   | 727 | 733 | 804 | 324 |
| 414.19 | 131 | 114 | 114 | 115 | 119 | 119 | 120 | 118 | 131 | 769.19 | 307 | 613 | 611 | 564 | 723   | 723 | 731 | 798 | 326 |
| 414.56 | 132 | 115 | 117 | 117 | 119 | 119 | 120 | 122 | 132 | 769.51 | 306 | 606 | 611 | 556 | 716   | 716 | 723 | 791 | 320 |
| 414.92 | 131 | 113 | 116 | 114 | 116 | 116 | 118 | 120 | 130 | 769.84 | 308 | 605 | 610 | 557 | 713   | 713 | 721 | 795 | 316 |
| 415.29 | 131 | 111 | 116 | 113 | 113 | 113 | 118 | 117 | 129 | 770.16 | 309 | 611 | 603 | 552 | 708   | 708 | 718 | 788 | 314 |
| 415.65 | 131 | 111 | 115 | 113 | 113 | 113 | 120 | 115 | 128 | 770.49 | 305 | 610 | 600 | 555 | 702   | 702 | 719 | 783 | 315 |
| 416.02 | 132 | 113 | 117 | 114 | 115 | 115 | 123 | 116 | 130 | 770.81 | 306 | 602 | 601 | 557 | 704   | 704 | 718 | 779 | 319 |
| 416.39 | 133 | 115 | 118 | 113 | 117 | 117 | 123 | 117 | 128 | 771.14 | 303 | 599 | 609 | 561 | 711   | 711 | 720 | 779 | 322 |
| 416.75 | 132 | 113 | 115 | 112 | 116 | 116 | 120 | 116 | 128 | 771.46 | 304 | 600 | 612 | 557 | 714   | 714 | 717 | 779 | 318 |
| 417.12 | 131 | 113 | 115 | 112 | 116 | 116 | 118 | 115 | 127 | 771.79 | 298 | 597 | 603 | 544 | 698   | 698 | 706 | 772 | 312 |
| 417.48 | 130 | 109 | 113 | 111 | 115 | 115 | 116 | 112 | 125 | 772.11 | 297 | 593 | 594 | 538 | 685   | 685 | 695 | 767 | 306 |
| 417.85 | 129 | 109 | 112 | 110 | 115 | 115 | 116 | 109 | 125 | 772.44 | 300 | 587 | 584 | 534 | 676   | 676 | 696 | 767 | 308 |
| 418.22 | 130 | 109 | 113 | 110 | 116 | 116 | 114 | 110 | 127 | 772.76 | 300 | 589 | 583 | 545 | 681   | 681 | 697 | 766 | 313 |
| 418.58 | 132 | 112 | 116 | 112 | 119 | 119 | 116 | 112 | 132 | 773.09 | 299 | 585 | 585 | 545 | 679   | 679 | 698 | 770 | 314 |
| 418.95 | 130 | 110 | 116 | 112 | 118 | 118 | 116 | 113 | 130 | 773.41 | 299 | 586 | 585 | 545 | 679   | 679 | 694 | 771 | 315 |
| 419.31 | 126 | 107 | 114 | 111 | 113 | 113 | 114 | 110 | 128 | 773.74 | 298 | 582 | 585 | 536 | 672   | 672 | 695 | 766 | 313 |
| 419.68 | 125 | 106 | 113 | 111 | 113 | 113 | 114 | 110 | 125 | 774.06 | 295 | 581 | 580 | 528 | 668   | 668 | 690 | 761 | 309 |
| 420.04 | 128 | 108 | 113 | 113 | 114 | 114 | 116 | 113 | 128 | 774.39 | 293 | 575 | 579 | 526 | 665   | 665 | 685 | 756 | 306 |
| 420.41 | 132 | 109 | 113 | 111 | 115 | 115 | 117 | 116 | 128 | 774.71 | 297 | 572 | 578 | 524 | 668   | 668 | 685 | 751 | 306 |
| 420.77 | 131 | 107 | 112 | 108 | 111 | 111 | 114 | 113 | 125 | 775.04 | 299 | 576 | 576 | 525 | 670   | 670 | 683 | 743 | 304 |
| 421.14 | 132 | 110 | 114 | 108 | 113 | 113 | 115 | 112 | 126 | 775.36 | 297 | 572 | 570 | 519 | 665   | 665 | 676 | 739 | 302 |
| 421.51 | 132 | 110 | 114 | 111 | 115 | 115 | 117 | 111 | 127 | 775.69 | 290 | 569 | 574 | 522 | 658   | 658 | 671 | 735 | 298 |
| 421.87 | 134 | 110 | 116 | 114 | 117 | 117 | 118 | 113 | 129 | 776.01 | 286 | 559 | 577 | 524 | 657   | 657 | 671 | 734 | 302 |
| 422.24 | 131 | 108 | 114 | 112 | 115 | 115 | 116 | 111 | 127 | 776.34 | 290 | 567 | 581 | 527 | 662   | 662 | 681 | 736 | 309 |
| 422.6  | 130 | 111 | 116 | 112 | 115 | 115 | 115 | 111 | 127 | 776.66 | 294 | 566 | 572 | 519 | 663   | 663 | 679 | 735 | 312 |
| 422.97 | 131 | 110 | 116 | 112 | 113 | 113 | 116 | 110 | 128 | 776.98 | 295 | 566 | 563 | 516 | 656   | 656 | 672 | 727 | 308 |
| 423.33 | 131 | 108 | 115 | 111 | 112 | 112 | 115 | 109 | 127 | 777.31 | 288 | 554 | 551 | 512 | 644   | 644 | 659 | 718 | 299 |
| 423.7  | 132 | 107 | 116 | 112 | 112 | 112 | 114 | 110 | 128 | 777.63 | 285 | 554 | 548 | 513 | 640   | 640 | 661 | 713 | 295 |
| 424.06 | 130 | 106 | 115 | 110 | 112 | 112 | 113 | 111 | 126 | 777.96 | 285 | 551 | 548 | 509 | 635   | 635 | 661 | 718 | 296 |
| 424.43 | 132 | 107 | 114 | 111 | 111 | 111 | 114 | 112 | 126 | 778.28 | 287 | 553 | 548 | 505 | 636   | 636 | 661 | 716 | 297 |
| 424.79 | 131 | 105 | 110 | 109 | 109 | 109 | 111 | 108 | 122 | 778.61 | 288 | 547 | 545 | 501 | 632   | 632 | 653 | 711 | 295 |
| 425.16 | 131 | 106 | 111 | 109 | 109 | 109 | 111 | 109 | 122 | 778.93 | 286 | 542 | 540 | 497 | 634   | 634 | 648 | 706 | 292 |
| 425.52 | 131 | 106 | 113 | 109 | 110 | 110 | 111 | 109 | 124 | 779.25 | 285 | 545 | 542 | 497 | 632   | 632 | 647 | 702 | 292 |
| 425.89 | 135 | 109 | 115 | 110 | 112 | 112 | 116 | 112 | 127 | 779.58 | 286 | 543 | 541 | 499 | 631   | 631 | 646 | 708 | 297 |
| 426.25 | 139 | 110 | 117 | 112 | 115 | 115 | 119 | 112 | 130 | 779.9  | 288 | 547 | 542 | 499 | 628   | 628 | 646 | 707 | 300 |
| 426.62 | 140 | 112 | 117 | 111 | 116 | 116 | 119 | 112 | 131 | 780.22 | 286 | 540 | 535 | 496 | 632   | 632 | 641 | 702 | 300 |
| 426.98 | 139 | 113 | 117 | 111 | 115 | 115 | 118 | 112 | 130 | 780.55 | 282 | 540 | 534 | 493 | 629</ |     |     |     |     |

|        |     |     |     |     |     |     |     |     |     |        |     |     |     |     |     |     |     |     |     |
|--------|-----|-----|-----|-----|-----|-----|-----|-----|-----|--------|-----|-----|-----|-----|-----|-----|-----|-----|-----|
| 430.63 | 138 | 115 | 122 | 117 | 114 | 114 | 116 | 115 | 135 | 783.78 | 277 | 522 | 518 | 478 | 597 | 597 | 619 | 671 | 286 |
| 430.99 | 137 | 114 | 121 | 117 | 112 | 112 | 117 | 111 | 134 | 784.11 | 277 | 521 | 514 | 470 | 602 | 602 | 618 | 661 | 286 |
| 431.36 | 135 | 112 | 120 | 117 | 112 | 112 | 113 | 104 | 130 | 784.43 | 276 | 521 | 514 | 472 | 600 | 600 | 611 | 661 | 286 |
| 431.72 | 135 | 114 | 122 | 116 | 113 | 113 | 113 | 104 | 129 | 784.75 | 274 | 518 | 509 | 468 | 593 | 593 | 607 | 657 | 282 |
| 432.09 | 139 | 116 | 125 | 116 | 115 | 115 | 114 | 109 | 129 | 785.08 | 272 | 517 | 513 | 473 | 582 | 582 | 599 | 658 | 283 |
| 432.45 | 141 | 118 | 126 | 118 | 116 | 116 | 116 | 114 | 131 | 785.4  | 271 | 510 | 510 | 471 | 579 | 579 | 599 | 658 | 278 |
| 432.82 | 141 | 118 | 125 | 119 | 117 | 117 | 117 | 115 | 132 | 785.72 | 271 | 505 | 512 | 468 | 581 | 581 | 599 | 662 | 279 |
| 433.18 | 141 | 121 | 127 | 123 | 120 | 120 | 119 | 118 | 136 | 786.05 | 273 | 501 | 504 | 465 | 579 | 579 | 599 | 655 | 274 |
| 433.55 | 138 | 120 | 128 | 123 | 120 | 120 | 118 | 119 | 136 | 786.37 | 274 | 499 | 499 | 459 | 577 | 577 | 596 | 653 | 272 |
| 433.91 | 139 | 119 | 130 | 122 | 119 | 119 | 117 | 121 | 136 | 786.69 | 279 | 500 | 504 | 462 | 577 | 577 | 601 | 652 | 274 |
| 434.27 | 135 | 115 | 125 | 117 | 115 | 115 | 114 | 117 | 134 | 787.01 | 276 | 500 | 505 | 460 | 582 | 582 | 600 | 652 | 275 |
| 434.64 | 140 | 117 | 124 | 116 | 116 | 116 | 114 | 118 | 135 | 787.34 | 275 | 507 | 512 | 464 | 581 | 581 | 604 | 650 | 280 |
| 435    | 142 | 119 | 125 | 119 | 118 | 118 | 115 | 118 | 137 | 787.66 | 270 | 503 | 500 | 458 | 579 | 579 | 602 | 648 | 278 |
| 435.37 | 147 | 123 | 130 | 124 | 121 | 121 | 116 | 121 | 140 | 787.98 | 267 | 499 | 500 | 456 | 571 | 571 | 598 | 640 | 279 |
| 435.73 | 145 | 125 | 133 | 126 | 123 | 123 | 116 | 121 | 140 | 788.3  | 266 | 494 | 497 | 453 | 574 | 574 | 595 | 637 | 278 |
| 436.09 | 145 | 124 | 132 | 122 | 121 | 121 | 114 | 121 | 140 | 788.63 | 269 | 494 | 502 | 459 | 581 | 581 | 591 | 636 | 283 |
| 436.46 | 146 | 126 | 134 | 122 | 123 | 123 | 116 | 121 | 139 | 788.95 | 271 | 494 | 500 | 458 | 580 | 580 | 592 | 640 | 282 |
| 436.82 | 148 | 125 | 134 | 122 | 122 | 122 | 117 | 122 | 138 | 789.27 | 274 | 500 | 503 | 460 | 580 | 580 | 595 | 647 | 280 |
| 437.19 | 151 | 132 | 137 | 129 | 126 | 126 | 123 | 129 | 143 | 789.59 | 271 | 502 | 499 | 452 | 570 | 570 | 594 | 647 | 275 |
| 437.55 | 148 | 136 | 141 | 133 | 126 | 126 | 125 | 132 | 144 | 789.92 | 270 | 499 | 498 | 453 | 573 | 573 | 597 | 650 | 274 |
| 437.91 | 149 | 138 | 142 | 135 | 129 | 129 | 125 | 133 | 146 | 790.24 | 270 | 496 | 493 | 448 | 569 | 569 | 595 | 642 | 277 |
| 438.28 | 152 | 136 | 146 | 136 | 132 | 132 | 125 | 131 | 145 | 790.56 | 274 | 497 | 496 | 453 | 571 | 571 | 594 | 647 | 282 |
| 438.64 | 153 | 132 | 141 | 132 | 130 | 130 | 122 | 130 | 143 | 790.88 | 274 | 502 | 495 | 450 | 569 | 569 | 588 | 643 | 281 |
| 439.01 | 150 | 131 | 140 | 129 | 126 | 126 | 120 | 130 | 139 | 791.21 | 269 | 500 | 496 | 456 | 569 | 569 | 586 | 643 | 279 |
| 439.37 | 148 | 134 | 139 | 126 | 125 | 125 | 122 | 132 | 139 | 791.53 | 264 | 497 | 497 | 454 | 572 | 572 | 586 | 635 | 272 |
| 439.73 | 150 | 136 | 140 | 128 | 128 | 128 | 126 | 131 | 142 | 791.85 | 266 | 497 | 497 | 459 | 572 | 572 | 594 | 634 | 275 |
| 440.1  | 150 | 133 | 139 | 129 | 128 | 128 | 128 | 130 | 144 | 792.17 | 267 | 495 | 498 | 455 | 575 | 575 | 591 | 637 | 277 |
| 440.46 | 147 | 131 | 137 | 131 | 125 | 125 | 124 | 127 | 144 | 792.49 | 269 | 494 | 495 | 454 | 572 | 572 | 590 | 635 | 282 |
| 440.83 | 146 | 130 | 138 | 131 | 127 | 127 | 122 | 128 | 142 | 792.82 | 267 | 495 | 500 | 452 | 578 | 578 | 586 | 632 | 280 |
| 441.19 | 151 | 137 | 144 | 135 | 133 | 133 | 126 | 130 | 145 | 793.14 | 266 | 497 | 493 | 454 | 574 | 574 | 585 | 632 | 276 |
| 441.55 | 153 | 138 | 147 | 135 | 137 | 137 | 129 | 134 | 147 | 793.46 | 267 | 494 | 489 | 453 | 571 | 571 | 582 | 636 | 274 |
| 441.92 | 154 | 139 | 148 | 137 | 137 | 137 | 131 | 135 | 150 | 793.78 | 266 | 491 | 483 | 448 | 563 | 563 | 583 | 639 | 275 |
| 442.28 | 152 | 136 | 146 | 138 | 134 | 134 | 129 | 136 | 149 | 794.1  | 264 | 489 | 487 | 443 | 558 | 558 | 585 | 636 | 276 |
| 442.64 | 158 | 140 | 147 | 141 | 134 | 134 | 131 | 140 | 153 | 794.43 | 265 | 491 | 487 | 444 | 554 | 554 | 588 | 628 | 274 |
| 443.01 | 161 | 143 | 152 | 143 | 137 | 137 | 138 | 144 | 157 | 794.75 | 265 | 490 | 490 | 443 | 554 | 554 | 581 | 624 | 276 |
| 443.37 | 162 | 147 | 157 | 142 | 142 | 142 | 144 | 147 | 159 | 795.07 | 265 | 488 | 487 | 443 | 556 | 556 | 577 | 621 | 274 |
| 443.73 | 159 | 149 | 159 | 143 | 146 | 146 | 146 | 145 | 157 | 795.39 | 261 | 486 | 491 | 443 | 562 | 562 | 573 | 624 | 272 |
| 444.1  | 157 | 152 | 159 | 144 | 146 | 146 | 147 | 145 | 157 | 795.71 | 260 | 482 | 489 | 443 | 566 | 566 | 575 | 628 | 269 |
| 444.46 | 158 | 153 | 162 | 146 | 145 | 145 | 148 | 146 | 156 | 796.03 | 262 | 483 | 490 | 446 | 561 | 561 | 579 | 633 | 271 |
| 444.82 | 155 | 154 | 163 | 147 | 144 | 144 | 152 | 148 | 154 | 796.36 | 264 | 481 | 484 | 443 | 559 | 559 | 581 | 628 | 271 |
| 445.19 | 160 | 155 | 167 | 151 | 150 | 150 | 158 | 151 | 157 | 796.68 | 264 | 482 | 486 | 444 | 555 | 555 | 581 | 618 | 267 |
| 445.55 | 164 | 160 | 166 | 155 | 154 | 154 | 163 | 155 | 161 | 797    | 266 | 482 | 481 | 438 | 554 | 554 | 577 | 614 | 266 |
| 445.91 | 168 | 160 | 168 | 158 | 156 | 156 | 166 | 157 | 168 | 797.32 | 265 | 481 | 485 | 435 | 552 | 552 | 573 | 615 | 267 |
| 446.28 | 163 | 163 | 166 | 154 | 154 | 154 | 163 | 156 | 166 | 797.64 | 265 | 475 | 481 | 434 | 549 | 549 | 576 | 616 | 269 |
| 446.64 | 163 | 162 | 166 | 154 | 151 | 151 | 164 | 158 | 165 | 797.96 | 265 | 473 | 486 | 439 | 551 | 551 | 575 | 615 | 269 |
| 447    | 163 | 161 | 168 | 151 | 151 | 151 | 163 | 158 | 159 | 798.28 | 260 | 476 | 481 | 447 | 551 | 551 | 574 | 610 | 271 |
| 447.37 | 163 | 161 | 168 | 151 | 151 | 151 | 169 | 160 | 157 | 798.6  | 257 | 484 | 483 | 449 | 552 | 552 | 570 | 617 | 276 |
| 447.73 | 163 | 161 | 169 | 151 | 153 | 153 | 169 | 162 | 160 | 798.92 | 258 | 481 | 481 | 444 | 550 | 550 | 568 | 615 | 276 |
| 448.09 | 163 | 159 | 165 | 153 | 156 | 156 | 172 | 162 | 163 | 799.25 | 258 | 476 | 477 | 442 | 545 | 545 | 564 | 619 | 273 |
| 448.45 | 165 | 157 | 166 | 156 | 153 | 153 | 169 | 162 | 164 | 799.57 | 260 | 470 | 476 | 441 | 546 | 546 | 562 | 614 | 268 |
| 448.82 | 162 | 158 | 168 | 158 | 157 | 157 | 172 | 161 | 161 | 799.89 | 253 | 472 | 471 | 440 | 543 | 543 | 561 | 608 | 264 |
| 449.18 | 163 | 163 | 169 | 157 | 157 | 157 | 175 | 164 | 159 | 800.21 | 254 | 473 | 470 | 434 | 542 | 542 | 560 | 602 | 261 |
| 449.54 | 162 | 168 | 169 | 158 | 163 | 163 | 181 | 168 | 161 | 800.53 | 255 | 474 | 464 | 434 | 540 | 540 | 563 | 600 | 264 |
| 449.91 | 168 | 170 | 170 | 158 | 170 | 170 | 185 | 170 | 162 | 800.85 | 264 | 478 | 470 | 442 | 551 | 551 | 570 | 607 | 269 |
| 450.27 | 168 | 170 | 172 | 161 | 172 | 172 | 190 | 170 | 164 | 801.17 | 268 | 473 | 476 | 446 | 557 | 557 | 576 | 618 | 272 |
| 450.63 | 172 | 169 | 175 | 163 | 175 | 175 | 190 | 169 | 165 | 801.49 | 270 | 477 | 482 | 444 | 561 | 561 | 575 | 621 | 276 |
| 450.99 | 173 | 175 | 178 | 166 | 178 | 178 | 190 | 175 | 167 | 801.81 | 264 | 464 | 482 | 438 | 554 | 554 | 572 | 620 | 273 |
| 451.36 | 174 | 178 | 181 | 167 | 181 | 181 | 193 | 178 | 167 | 802.13 | 262 | 469 | 480 | 436 | 550 | 550 | 570 | 611 | 272 |
| 451.72 | 172 | 180 | 182 | 170 | 182 | 182 | 194 | 180 | 167 | 802.45 | 262 | 465 | 476 | 436 | 545 | 545 | 567 | 603 | 270 |
| 452.08 | 171 | 178 | 185 | 171 | 185 | 185 | 196 | 178 | 170 | 802.77 | 262 | 475 | 469 | 431 | 546 | 546 | 562 | 599 | 268 |
| 452.44 | 176 | 180 | 190 | 174 | 190 | 190 | 201 | 180 | 170 | 803.09 | 262 | 474 | 467 | 433 | 540 | 540 | 556 | 596 | 265 |
| 452.81 | 176 | 182 | 190 | 171 | 190 | 190 | 206 | 182 | 171 | 803.41 | 257 | 469 | 466 | 432 | 537 | 537 | 553 | 600 | 262 |
| 453.17 | 177 | 184 | 190 | 176 | 190 | 190 | 208 | 184 | 170 | 803.73 | 259 | 465 | 469 | 434 | 533 | 533 | 552 | 598 | 260 |
| 453.53 | 177 | 187 | 193 | 176 | 193 | 193 | 211 | 187 | 177 | 804.05 | 260 | 466 | 471 | 434 | 536 | 536 | 553 | 601 | 262 |
| 453.89 | 179 | 190 | 194 | 180 | 194 | 194 | 215 | 190 | 179 | 804.37 | 264 | 469 | 469 | 433 | 536 | 536 | 556 | 604 | 265 |
| 454.26 | 177 | 193 | 196 | 175 | 196 | 196 | 218 | 193 | 177 | 804.7  | 259 | 467 | 467 | 425 | 528 | 528 | 556 | 602 | 266 |
| 454.62 | 175 | 191 | 192 | 177 | 192 | 192 | 218 | 191 | 176 | 805.02 | 252 | 460 | 460 | 424 | 529 | 529 | 552 | 594 | 265 |
| 454.98 | 177 | 194 | 194 | 180 | 194 | 194 | 219 | 194 | 178 | 805.34 | 252 | 459 | 460 | 422 | 527 | 527 | 544 | 592 | 258 |
| 455.34 | 182 | 191 | 195 | 183 | 195 | 195 | 222 | 191 | 184 | 805.66 | 254 | 460 | 460 | 432 | 532 | 532 | 549 | 593 | 265 |
| 455.71 | 187 | 199 | 205 | 184 | 205 | 205 | 231 | 199 | 186 | 805.98 | 258 | 465 | 472 | 430 | 531 | 531 | 556 | 598 | 270 |
| 456.07 | 187 | 199 | 203 | 182 | 203 | 203 | 233 | 199 | 187 | 806.3  | 255 | 467 | 471 | 431 | 533 | 533 | 557 | 597 | 274 |
| 456.43 | 186 | 204 | 202 | 186 | 202 | 202 | 235 | 204 | 183 | 806.61 | 250 | 466 | 468 | 424 | 529 | 529 | 549 | 594 | 265 |
| 456.79 | 185 | 202 | 202 | 190 | 202 | 202 | 230 | 208 | 184 | 806.93 | 254 | 463 | 461 | 421 | 530 |     |     |     |     |

|        |     |     |     |     |     |     |     |     |     |        |     |     |     |     |     |     |     |     |     |
|--------|-----|-----|-----|-----|-----|-----|-----|-----|-----|--------|-----|-----|-----|-----|-----|-----|-----|-----|-----|
| 460.41 | 191 | 216 | 216 | 202 | 217 | 217 | 255 | 225 | 186 | 810.13 | 255 | 453 | 452 | 411 | 523 | 523 | 535 | 579 | 262 |
| 460.78 | 191 | 219 | 227 | 202 | 221 | 221 | 258 | 232 | 188 | 810.45 | 255 | 452 | 449 | 414 | 518 | 518 | 531 | 578 | 259 |
| 461.14 | 190 | 218 | 229 | 202 | 223 | 223 | 257 | 236 | 189 | 810.77 | 255 | 451 | 445 | 414 | 517 | 517 | 527 | 576 | 258 |
| 461.5  | 192 | 223 | 227 | 205 | 226 | 226 | 259 | 237 | 191 | 811.09 | 256 | 452 | 445 | 413 | 515 | 515 | 526 | 571 | 257 |
| 461.86 | 190 | 222 | 222 | 202 | 225 | 225 | 262 | 235 | 190 | 811.41 | 256 | 450 | 441 | 408 | 509 | 509 | 523 | 566 | 259 |
| 462.22 | 193 | 226 | 223 | 212 | 230 | 230 | 271 | 237 | 194 | 811.73 | 255 | 444 | 442 | 409 | 503 | 503 | 527 | 564 | 257 |
| 462.58 | 192 | 230 | 230 | 215 | 230 | 230 | 282 | 247 | 194 | 812.05 | 252 | 436 | 439 | 410 | 500 | 500 | 524 | 561 | 257 |
| 462.95 | 195 | 235 | 235 | 219 | 234 | 234 | 284 | 250 | 198 | 812.36 | 253 | 437 | 442 | 413 | 500 | 500 | 528 | 569 | 260 |
| 463.31 | 196 | 238 | 239 | 218 | 238 | 238 | 286 | 252 | 199 | 812.68 | 250 | 438 | 440 | 412 | 505 | 505 | 529 | 568 | 262 |
| 463.67 | 203 | 240 | 244 | 220 | 245 | 245 | 284 | 253 | 203 | 813    | 251 | 441 | 443 | 415 | 506 | 506 | 532 | 569 | 264 |
| 464.03 | 208 | 242 | 244 | 220 | 246 | 246 | 284 | 253 | 203 | 813.32 | 246 | 436 | 440 | 409 | 504 | 504 | 525 | 556 | 256 |
| 464.39 | 207 | 241 | 243 | 218 | 242 | 242 | 284 | 254 | 200 | 813.64 | 249 | 438 | 439 | 404 | 502 | 502 | 518 | 555 | 253 |
| 464.75 | 206 | 238 | 245 | 221 | 244 | 244 | 288 | 256 | 202 | 813.96 | 247 | 437 | 437 | 401 | 502 | 502 | 512 | 555 | 249 |
| 465.11 | 206 | 242 | 251 | 229 | 250 | 250 | 297 | 262 | 205 | 814.28 | 249 | 441 | 439 | 404 | 504 | 504 | 516 | 562 | 252 |
| 465.48 | 206 | 244 | 249 | 229 | 253 | 253 | 301 | 264 | 209 | 814.6  | 244 | 440 | 443 | 402 | 501 | 501 | 517 | 565 | 255 |
| 465.84 | 205 | 249 | 248 | 232 | 252 | 252 | 302 | 265 | 209 | 814.91 | 242 | 436 | 440 | 399 | 498 | 498 | 515 | 559 | 254 |
| 466.2  | 200 | 245 | 247 | 229 | 251 | 251 | 303 | 267 | 207 | 815.23 | 242 | 433 | 436 | 395 | 497 | 497 | 513 | 555 | 259 |
| 466.56 | 201 | 252 | 256 | 235 | 258 | 258 | 305 | 274 | 207 | 815.55 | 246 | 434 | 433 | 399 | 498 | 498 | 511 | 551 | 256 |
| 466.92 | 203 | 253 | 259 | 233 | 262 | 262 | 310 | 276 | 209 | 815.87 | 253 | 437 | 435 | 400 | 500 | 500 | 515 | 552 | 260 |
| 467.28 | 209 | 260 | 264 | 237 | 267 | 267 | 315 | 282 | 211 | 816.19 | 254 | 442 | 437 | 402 | 498 | 498 | 513 | 551 | 258 |
| 467.64 | 208 | 258 | 262 | 234 | 266 | 266 | 315 | 280 | 215 | 816.51 | 253 | 433 | 431 | 393 | 494 | 494 | 514 | 548 | 255 |
| 468    | 211 | 259 | 260 | 236 | 265 | 265 | 317 | 283 | 214 | 816.82 | 250 | 434 | 430 | 393 | 491 | 491 | 509 | 549 | 252 |
| 468.37 | 214 | 260 | 265 | 239 | 270 | 270 | 320 | 284 | 217 | 817.14 | 245 | 427 | 424 | 392 | 488 | 488 | 508 | 549 | 248 |
| 468.73 | 219 | 266 | 267 | 244 | 277 | 277 | 330 | 286 | 214 | 817.46 | 242 | 426 | 423 | 394 | 488 | 488 | 504 | 549 | 249 |
| 469.09 | 217 | 270 | 274 | 247 | 285 | 285 | 331 | 287 | 215 | 817.78 | 241 | 423 | 417 | 390 | 487 | 487 | 511 | 547 | 247 |
| 469.45 | 212 | 271 | 272 | 245 | 284 | 284 | 332 | 286 | 213 | 818.1  | 243 | 425 | 420 | 390 | 484 | 484 | 513 | 543 | 250 |
| 469.81 | 211 | 273 | 277 | 247 | 282 | 282 | 328 | 291 | 218 | 818.42 | 245 | 428 | 423 | 392 | 484 | 484 | 514 | 542 | 250 |
| 470.17 | 215 | 274 | 280 | 249 | 287 | 287 | 329 | 291 | 221 | 818.73 | 250 | 428 | 428 | 396 | 482 | 482 | 512 | 542 | 253 |
| 470.53 | 219 | 283 | 283 | 251 | 288 | 288 | 334 | 299 | 226 | 819.05 | 249 | 421 | 424 | 392 | 479 | 479 | 505 | 542 | 250 |
| 470.89 | 224 | 288 | 283 | 257 | 297 | 297 | 341 | 308 | 227 | 819.37 | 249 | 420 | 423 | 391 | 480 | 480 | 501 | 546 | 252 |
| 471.25 | 227 | 290 | 287 | 259 | 294 | 294 | 353 | 320 | 230 | 819.69 | 244 | 420 | 418 | 390 | 482 | 482 | 499 | 545 | 250 |
| 471.61 | 221 | 288 | 287 | 261 | 301 | 301 | 351 | 319 | 232 | 820    | 247 | 418 | 418 | 392 | 488 | 488 | 496 | 542 | 251 |
| 471.97 | 218 | 287 | 288 | 257 | 297 | 297 | 353 | 317 | 230 | 820.32 | 249 | 419 | 418 | 392 | 488 | 488 | 500 | 538 | 248 |
| 472.34 | 219 | 291 | 286 | 260 | 298 | 298 | 352 | 315 | 226 | 820.64 | 248 | 415 | 420 | 391 | 485 | 485 | 498 | 536 | 248 |
| 472.7  | 224 | 296 | 291 | 262 | 301 | 301 | 360 | 322 | 223 | 820.96 | 244 | 419 | 418 | 389 | 483 | 483 | 505 | 536 | 247 |
| 473.06 | 228 | 299 | 294 | 265 | 306 | 306 | 363 | 321 | 224 | 821.28 | 241 | 418 | 418 | 388 | 478 | 478 | 502 | 533 | 246 |
| 473.42 | 227 | 301 | 299 | 268 | 313 | 313 | 367 | 325 | 225 | 821.59 | 240 | 416 | 413 | 384 | 476 | 476 | 499 | 532 | 248 |
| 473.78 | 228 | 301 | 303 | 271 | 314 | 314 | 368 | 329 | 230 | 821.91 | 239 | 407 | 414 | 386 | 474 | 474 | 496 | 528 | 245 |
| 474.14 | 230 | 308 | 310 | 278 | 322 | 322 | 372 | 335 | 236 | 822.23 | 239 | 405 | 410 | 388 | 474 | 474 | 496 | 530 | 248 |
| 474.5  | 232 | 311 | 310 | 283 | 327 | 327 | 375 | 345 | 239 | 822.55 | 242 | 407 | 414 | 387 | 471 | 471 | 492 | 530 | 250 |
| 474.86 | 235 | 315 | 317 | 290 | 333 | 333 | 382 | 351 | 241 | 822.86 | 244 | 418 | 414 | 385 | 474 | 474 | 492 | 535 | 253 |
| 475.22 | 230 | 318 | 319 | 289 | 336 | 336 | 383 | 355 | 241 | 823.18 | 242 | 413 | 413 | 380 | 470 | 470 | 491 | 528 | 252 |
| 475.58 | 232 | 323 | 325 | 290 | 339 | 339 | 389 | 357 | 241 | 823.5  | 243 | 414 | 413 | 383 | 468 | 468 | 495 | 520 | 250 |
| 475.94 | 235 | 327 | 325 | 292 | 343 | 343 | 393 | 363 | 241 | 823.81 | 243 | 410 | 413 | 382 | 467 | 467 | 490 | 513 | 248 |
| 476.3  | 238 | 326 | 326 | 292 | 343 | 343 | 396 | 365 | 239 | 824.13 | 242 | 411 | 412 | 380 | 464 | 464 | 489 | 518 | 243 |
| 476.66 | 240 | 329 | 327 | 294 | 351 | 351 | 395 | 367 | 244 | 824.45 | 237 | 403 | 405 | 377 | 464 | 464 | 483 | 518 | 242 |
| 477.02 | 241 | 330 | 331 | 291 | 352 | 352 | 397 | 364 | 246 | 824.77 | 233 | 401 | 402 | 374 | 459 | 459 | 480 | 517 | 240 |
| 477.38 | 247 | 341 | 340 | 305 | 359 | 359 | 409 | 378 | 253 | 825.08 | 231 | 401 | 398 | 376 | 461 | 461 | 481 | 516 | 244 |
| 477.74 | 248 | 343 | 346 | 306 | 361 | 361 | 415 | 381 | 252 | 825.4  | 230 | 405 | 397 | 376 | 459 | 459 | 482 | 516 | 244 |
| 478.1  | 251 | 347 | 346 | 313 | 365 | 365 | 418 | 390 | 253 | 825.72 | 231 | 404 | 399 | 374 | 463 | 463 | 483 | 516 | 243 |
| 478.46 | 247 | 340 | 344 | 313 | 365 | 365 | 416 | 389 | 248 | 826.03 | 232 | 405 | 404 | 372 | 463 | 463 | 484 | 514 | 245 |
| 478.82 | 246 | 344 | 350 | 319 | 368 | 368 | 420 | 398 | 253 | 826.35 | 233 | 403 | 408 | 368 | 463 | 463 | 483 | 511 | 242 |
| 479.18 | 245 | 351 | 353 | 322 | 373 | 373 | 429 | 400 | 254 | 826.67 | 233 | 404 | 404 | 371 | 455 | 455 | 485 | 506 | 247 |
| 479.54 | 247 | 359 | 353 | 319 | 376 | 376 | 430 | 401 | 254 | 826.98 | 231 | 396 | 395 | 370 | 453 | 453 | 478 | 500 | 239 |
| 479.9  | 252 | 366 | 354 | 324 | 379 | 379 | 439 | 412 | 255 | 827.3  | 231 | 394 | 389 | 370 | 451 | 451 | 471 | 502 | 238 |
| 480.26 | 254 | 364 | 358 | 325 | 381 | 381 | 437 | 420 | 255 | 827.62 | 231 | 390 | 387 | 368 | 450 | 450 | 463 | 499 | 232 |
| 480.62 | 253 | 372 | 367 | 332 | 389 | 389 | 444 | 426 | 263 | 827.93 | 230 | 393 | 390 | 367 | 450 | 450 | 465 | 503 | 235 |
| 480.98 | 252 | 369 | 366 | 332 | 391 | 391 | 443 | 421 | 261 | 828.25 | 233 | 398 | 394 | 374 | 454 | 454 | 474 | 505 | 239 |
| 481.34 | 245 | 366 | 361 | 331 | 392 | 392 | 445 | 415 | 261 | 828.57 | 237 | 403 | 403 | 373 | 461 | 461 | 477 | 507 | 244 |
| 481.7  | 250 | 361 | 359 | 337 | 393 | 393 | 445 | 422 | 258 | 828.88 | 237 | 400 | 402 | 370 | 460 | 460 | 476 | 503 | 245 |
| 482.06 | 257 | 377 | 369 | 342 | 404 | 404 | 457 | 428 | 267 | 829.2  | 232 | 395 | 401 | 363 | 457 | 457 | 469 | 499 | 241 |
| 482.42 | 270 | 391 | 385 | 353 | 419 | 419 | 468 | 441 | 273 | 829.52 | 226 | 391 | 391 | 359 | 449 | 449 | 466 | 502 | 239 |
| 482.78 | 274 | 403 | 397 | 359 | 425 | 425 | 478 | 451 | 278 | 829.83 | 226 | 390 | 393 | 361 | 445 | 445 | 462 | 500 | 238 |
| 483.14 | 270 | 400 | 400 | 360 | 426 | 426 | 476 | 460 | 274 | 830.15 | 229 | 389 | 390 | 359 | 444 | 444 | 461 | 498 | 237 |
| 483.5  | 266 | 403 | 397 | 358 | 428 | 428 | 479 | 461 | 278 | 830.46 | 230 | 389 | 389 | 360 | 445 | 445 | 461 | 492 | 238 |
| 483.86 | 270 | 410 | 403 | 360 | 436 | 436 | 492 | 464 | 287 | 830.78 | 231 | 389 | 385 | 356 | 447 | 447 | 465 | 489 | 234 |
| 484.22 | 275 | 416 | 409 | 363 | 440 | 440 | 497 | 473 | 293 | 831.1  | 229 | 388 | 386 | 357 | 446 | 446 | 465 | 490 | 233 |
| 484.58 | 277 | 414 | 413 | 370 | 445 | 445 | 497 | 479 | 293 | 831.41 | 227 | 383 | 386 | 358 | 441 | 441 | 460 | 491 | 230 |
| 484.94 | 282 | 414 | 416 | 374 | 451 | 451 | 491 | 483 | 293 | 831.73 | 228 | 378 | 387 | 360 | 442 | 442 | 455 | 497 | 231 |
| 485.3  | 285 | 421 | 425 | 382 | 459 | 459 | 497 | 481 | 295 | 832.04 | 227 | 378 | 383 | 358 | 439 | 439 | 453 | 491 | 233 |
| 485.66 | 288 | 426 | 427 | 386 | 458 | 458 | 503 | 485 | 294 | 832.36 | 230 | 382 | 384 | 357 | 443 | 443 | 457 | 491 | 231 |
| 486.02 | 290 | 434 | 430 | 390 | 460 | 460 | 513 | 488 | 298 | 832.68 | 229 | 387 | 384 | 358 | 440 | 440 | 460 | 482 | 236 |
| 486.38 | 290 | 434 | 426 | 392 | 465 | 465 | 516 | 491 | 293 | 832.99 | 231 | 386 | 390 | 362 | 441 | 441 |     |     |     |

|        |     |     |     |     |     |     |     |     |     |        |     |     |     |     |     |     |     |     |     |
|--------|-----|-----|-----|-----|-----|-----|-----|-----|-----|--------|-----|-----|-----|-----|-----|-----|-----|-----|-----|
| 489.97 | 297 | 446 | 442 | 411 | 492 | 492 | 538 | 522 | 297 | 836.15 | 233 | 382 | 379 | 347 | 429 | 429 | 442 | 481 | 231 |
| 490.33 | 296 | 454 | 447 | 415 | 488 | 488 | 541 | 521 | 301 | 836.46 | 232 | 379 | 377 | 352 | 430 | 430 | 441 | 480 | 236 |
| 490.69 | 298 | 468 | 451 | 419 | 494 | 494 | 548 | 534 | 299 | 836.78 | 229 | 377 | 375 | 350 | 428 | 428 | 446 | 477 | 235 |
| 491.05 | 298 | 477 | 459 | 419 | 505 | 505 | 554 | 541 | 306 | 837.09 | 226 | 376 | 371 | 347 | 425 | 425 | 439 | 475 | 234 |
| 491.4  | 305 | 489 | 467 | 429 | 519 | 519 | 565 | 553 | 309 | 837.41 | 226 | 378 | 370 | 341 | 428 | 428 | 444 | 473 | 228 |
| 491.76 | 303 | 486 | 468 | 426 | 521 | 521 | 565 | 546 | 313 | 837.72 | 223 | 371 | 376 | 344 | 435 | 435 | 439 | 472 | 227 |
| 492.12 | 306 | 490 | 469 | 431 | 524 | 524 | 565 | 553 | 313 | 838.04 | 223 | 375 | 379 | 344 | 439 | 439 | 446 | 468 | 229 |
| 492.48 | 305 | 479 | 468 | 427 | 519 | 519 | 565 | 552 | 315 | 838.35 | 221 | 372 | 380 | 346 | 435 | 435 | 439 | 469 | 229 |
| 492.84 | 309 | 480 | 477 | 441 | 526 | 526 | 569 | 565 | 316 | 838.67 | 223 | 372 | 374 | 338 | 427 | 427 | 435 | 464 | 225 |
| 493.2  | 303 | 484 | 478 | 438 | 526 | 526 | 569 | 561 | 316 | 838.98 | 220 | 365 | 365 | 335 | 423 | 423 | 433 | 463 | 221 |
| 493.56 | 305 | 492 | 486 | 444 | 536 | 536 | 574 | 569 | 320 | 839.3  | 227 | 362 | 369 | 338 | 421 | 421 | 434 | 464 | 222 |
| 493.92 | 307 | 502 | 489 | 437 | 539 | 539 | 575 | 574 | 321 | 839.61 | 229 | 364 | 366 | 342 | 423 | 423 | 441 | 467 | 230 |
| 494.27 | 308 | 502 | 492 | 436 | 539 | 539 | 578 | 579 | 317 | 839.93 | 229 | 369 | 373 | 347 | 418 | 418 | 439 | 465 | 232 |
| 494.63 | 307 | 501 | 493 | 432 | 542 | 542 | 582 | 579 | 313 | 840.24 | 227 | 371 | 372 | 342 | 416 | 416 | 436 | 462 | 234 |
| 494.99 | 304 | 497 | 495 | 433 | 541 | 541 | 585 | 581 | 319 | 840.55 | 221 | 367 | 370 | 339 | 410 | 410 | 431 | 457 | 228 |
| 495.35 | 307 | 500 | 504 | 443 | 547 | 547 | 586 | 583 | 325 | 840.87 | 219 | 363 | 366 | 334 | 412 | 412 | 436 | 459 | 225 |
| 495.71 | 308 | 508 | 503 | 448 | 552 | 552 | 584 | 584 | 323 | 841.18 | 217 | 356 | 362 | 333 | 409 | 409 | 437 | 457 | 222 |
| 496.07 | 313 | 513 | 504 | 454 | 552 | 552 | 582 | 578 | 321 | 841.5  | 220 | 355 | 368 | 335 | 414 | 414 | 436 | 456 | 226 |
| 496.42 | 314 | 517 | 502 | 452 | 553 | 553 | 594 | 587 | 321 | 841.81 | 221 | 355 | 370 | 332 | 413 | 413 | 434 | 457 | 226 |
| 496.78 | 317 | 514 | 502 | 455 | 553 | 553 | 597 | 592 | 324 | 842.13 | 221 | 362 | 368 | 333 | 414 | 414 | 429 | 454 | 225 |
| 497.14 | 316 | 518 | 504 | 460 | 560 | 560 | 602 | 602 | 324 | 842.44 | 223 | 368 | 368 | 336 | 412 | 412 | 432 | 458 | 225 |
| 497.5  | 317 | 522 | 512 | 465 | 567 | 567 | 602 | 602 | 325 | 842.76 | 218 | 363 | 362 | 330 | 409 | 409 | 425 | 450 | 220 |
| 497.86 | 320 | 527 | 520 | 465 | 572 | 572 | 606 | 606 | 325 | 843.07 | 217 | 357 | 360 | 328 | 406 | 406 | 422 | 445 | 220 |
| 498.22 | 318 | 529 | 521 | 468 | 579 | 579 | 614 | 609 | 322 | 843.38 | 213 | 351 | 352 | 319 | 404 | 404 | 416 | 441 | 217 |
| 498.57 | 319 | 536 | 523 | 472 | 585 | 585 | 615 | 612 | 325 | 843.7  | 215 | 350 | 354 | 323 | 404 | 404 | 414 | 446 | 222 |
| 498.93 | 317 | 534 | 522 | 475 | 588 | 588 | 617 | 613 | 327 | 844.01 | 218 | 349 | 355 | 322 | 402 | 402 | 416 | 451 | 225 |
| 499.29 | 321 | 535 | 525 | 474 | 587 | 587 | 614 | 618 | 330 | 844.33 | 217 | 349 | 353 | 324 | 399 | 399 | 415 | 446 | 226 |
| 499.65 | 322 | 537 | 522 | 474 | 586 | 586 | 616 | 622 | 331 | 844.64 | 220 | 355 | 351 | 325 | 399 | 399 | 418 | 442 | 225 |
| 500.01 | 325 | 543 | 527 | 482 | 587 | 587 | 616 | 629 | 336 | 844.95 | 220 | 358 | 353 | 326 | 403 | 403 | 415 | 440 | 227 |
| 500.36 | 324 | 547 | 529 | 484 | 589 | 589 | 622 | 628 | 341 | 845.27 | 226 | 359 | 354 | 329 | 404 | 404 | 416 | 444 | 227 |
| 500.72 | 325 | 548 | 527 | 485 | 594 | 594 | 623 | 628 | 339 | 845.58 | 224 | 355 | 355 | 330 | 399 | 399 | 416 | 446 | 228 |
| 501.08 | 321 | 550 | 531 | 480 | 599 | 599 | 626 | 626 | 335 | 845.89 | 222 | 352 | 354 | 333 | 393 | 393 | 420 | 445 | 226 |
| 501.44 | 325 | 550 | 540 | 484 | 603 | 603 | 621 | 631 | 337 | 846.21 | 217 | 350 | 356 | 330 | 396 | 396 | 420 | 447 | 224 |
| 501.8  | 329 | 548 | 547 | 487 | 605 | 605 | 622 | 634 | 336 | 846.52 | 221 | 354 | 352 | 328 | 398 | 398 | 418 | 445 | 225 |
| 502.15 | 333 | 549 | 547 | 490 | 606 | 606 | 623 | 637 | 338 | 846.83 | 219 | 356 | 352 | 321 | 399 | 399 | 415 | 445 | 223 |
| 502.51 | 332 | 544 | 544 | 490 | 613 | 613 | 629 | 641 | 334 | 847.15 | 218 | 352 | 348 | 320 | 394 | 394 | 409 | 439 | 222 |
| 502.87 | 329 | 555 | 543 | 494 | 611 | 611 | 632 | 647 | 337 | 847.46 | 213 | 347 | 348 | 319 | 387 | 387 | 408 | 434 | 220 |
| 503.23 | 330 | 553 | 544 | 497 | 610 | 610 | 633 | 652 | 339 | 847.78 | 217 | 343 | 345 | 321 | 388 | 388 | 409 | 432 | 221 |
| 503.58 | 330 | 558 | 550 | 504 | 614 | 614 | 631 | 653 | 340 | 848.09 | 218 | 342 | 346 | 319 | 388 | 388 | 413 | 434 | 221 |
| 503.94 | 330 | 552 | 556 | 500 | 618 | 618 | 632 | 656 | 339 | 848.4  | 221 | 344 | 349 | 318 | 390 | 390 | 415 | 436 | 223 |
| 504.3  | 330 | 556 | 554 | 500 | 622 | 622 | 629 | 655 | 334 | 848.72 | 220 | 345 | 350 | 319 | 388 | 388 | 414 | 438 | 223 |
| 504.66 | 334 | 566 | 555 | 498 | 620 | 620 | 628 | 656 | 332 | 849.03 | 218 | 342 | 344 | 319 | 388 | 388 | 408 | 432 | 223 |
| 505.01 | 335 | 568 | 557 | 499 | 619 | 619 | 633 | 657 | 336 | 849.34 | 215 | 340 | 338 | 318 | 388 | 388 | 405 | 430 | 220 |
| 505.37 | 335 | 567 | 563 | 503 | 620 | 620 | 635 | 656 | 344 | 849.65 | 213 | 340 | 343 | 319 | 392 | 392 | 405 | 431 | 219 |
| 505.73 | 333 | 570 | 563 | 504 | 620 | 620 | 637 | 661 | 349 | 849.97 | 214 | 345 | 345 | 318 | 388 | 388 | 406 | 434 | 218 |
| 506.09 | 328 | 572 | 561 | 503 | 623 | 623 | 628 | 665 | 348 | 850.28 | 216 | 346 | 348 | 319 | 388 | 388 | 407 | 434 | 220 |
| 506.44 | 328 | 577 | 562 | 503 | 623 | 623 | 630 | 673 | 342 | 850.59 | 215 | 339 | 340 | 317 | 384 | 384 | 402 | 428 | 217 |
| 506.8  | 330 | 572 | 567 | 511 | 628 | 628 | 634 | 680 | 341 | 850.91 | 215 | 337 | 341 | 318 | 389 | 389 | 398 | 423 | 218 |
| 507.16 | 336 | 575 | 571 | 519 | 636 | 636 | 639 | 684 | 346 | 851.22 | 211 | 333 | 344 | 314 | 384 | 384 | 392 | 419 | 218 |
| 507.52 | 337 | 580 | 574 | 520 | 643 | 643 | 644 | 689 | 351 | 851.53 | 212 | 334 | 346 | 310 | 381 | 381 | 392 | 418 | 218 |
| 507.87 | 338 | 585 | 576 | 516 | 647 | 647 | 648 | 688 | 350 | 851.84 | 211 | 333 | 343 | 309 | 380 | 380 | 396 | 421 | 219 |
| 508.23 | 337 | 590 | 580 | 517 | 647 | 647 | 649 | 687 | 350 | 852.16 | 209 | 330 | 333 | 308 | 381 | 381 | 396 | 423 | 216 |
| 508.59 | 342 | 591 | 584 | 517 | 647 | 647 | 651 | 683 | 351 | 852.47 | 210 | 331 | 331 | 310 | 382 | 382 | 397 | 423 | 219 |
| 508.95 | 341 | 598 | 574 | 515 | 640 | 640 | 649 | 682 | 357 | 852.78 | 207 | 327 | 334 | 308 | 376 | 376 | 393 | 421 | 218 |
| 509.3  | 333 | 595 | 575 | 515 | 645 | 645 | 650 | 681 | 353 | 853.09 | 215 | 336 | 341 | 315 | 383 | 383 | 400 | 424 | 223 |
| 509.66 | 333 | 600 | 575 | 521 | 647 | 647 | 651 | 683 | 349 | 853.41 | 215 | 339 | 342 | 312 | 382 | 382 | 396 | 422 | 220 |
| 510.02 | 333 | 600 | 587 | 525 | 653 | 653 | 657 | 691 | 352 | 853.72 | 216 | 340 | 339 | 311 | 378 | 378 | 394 | 420 | 216 |
| 510.37 | 339 | 598 | 591 | 529 | 649 | 649 | 655 | 699 | 352 | 854.03 | 214 | 332 | 335 | 305 | 370 | 370 | 383 | 421 | 211 |
| 510.73 | 338 | 597 | 599 | 531 | 653 | 653 | 653 | 704 | 359 | 854.34 | 212 | 331 | 331 | 308 | 365 | 365 | 384 | 419 | 209 |
| 511.09 | 340 | 598 | 597 | 534 | 653 | 653 | 653 | 704 | 357 | 854.66 | 212 | 327 | 332 | 312 | 369 | 369 | 384 | 423 | 211 |
| 511.44 | 344 | 611 | 595 | 535 | 655 | 655 | 661 | 709 | 359 | 854.97 | 211 | 327 | 332 | 311 | 372 | 372 | 388 | 416 | 211 |
| 511.8  | 346 | 612 | 592 | 532 | 659 | 659 | 670 | 710 | 358 | 855.28 | 208 | 324 | 333 | 308 | 375 | 375 | 387 | 415 | 212 |
| 512.16 | 344 | 613 | 595 | 530 | 670 | 670 | 667 | 709 | 355 | 855.59 | 210 | 324 | 328 | 303 | 370 | 370 | 385 | 406 | 212 |
| 512.51 | 346 | 610 | 598 | 532 | 670 | 670 | 661 | 711 | 358 | 855.91 | 209 | 322 | 329 | 303 | 365 | 365 | 386 | 402 | 214 |
| 512.87 | 348 | 609 | 596 | 539 | 669 | 669 | 658 | 718 | 362 | 856.22 | 212 | 324 | 327 | 302 | 360 | 360 | 388 | 408 | 212 |
| 513.23 | 352 | 615 | 601 | 544 | 663 | 663 | 664 | 725 | 369 | 856.53 | 207 | 322 | 327 | 296 | 357 | 357 | 384 | 407 | 211 |
| 513.58 | 349 | 611 | 601 | 545 | 666 | 666 | 671 | 722 | 368 | 856.84 | 204 | 319 | 326 | 297 | 357 | 357 | 378 | 409 | 209 |
| 513.94 | 350 | 615 | 610 | 544 | 661 | 661 | 669 | 721 | 368 | 857.15 | 200 | 312 | 324 | 294 | 355 | 355 | 367 | 399 | 207 |
| 514.3  | 352 | 614 | 612 | 547 | 661 | 661 | 673 | 715 | 362 | 857.46 | 203 | 312 | 325 | 298 | 359 | 359 | 370 | 396 | 209 |
| 514.65 | 362 | 619 | 612 | 549 | 669 | 669 | 675 | 719 | 367 | 857.78 | 207 | 316 | 321 | 294 | 359 | 359 | 369 | 393 | 210 |
| 515.01 | 364 | 627 | 615 | 556 | 672 | 672 | 677 | 717 | 370 | 858.09 | 207 | 316 | 318 | 294 | 363 | 363 | 367 | 393 | 209 |
| 515.37 | 366 | 629 | 620 | 557 | 678 | 678 | 682 | 724 | 380 | 858.4  | 205 | 318 | 315 | 294 | 361 | 361 | 369 | 393 | 211 |
| 515.72 | 365 | 638 | 626 | 565 | 675 | 675 | 687 | 724 | 382 | 858.71 | 204 | 316 | 317 | 292 | 35  |     |     |     |     |

|        |     |     |     |     |     |     |     |     |     |        |     |     |     |     |     |     |     |     |     |
|--------|-----|-----|-----|-----|-----|-----|-----|-----|-----|--------|-----|-----|-----|-----|-----|-----|-----|-----|-----|
| 519.29 | 353 | 618 | 617 | 550 | 662 | 662 | 678 | 718 | 379 | 861.82 | 204 | 304 | 300 | 286 | 344 | 344 | 361 | 378 | 209 |
| 519.64 | 354 | 619 | 618 | 553 | 653 | 653 | 678 | 712 | 373 | 862.14 | 200 | 301 | 296 | 284 | 342 | 342 | 354 | 371 | 203 |
| 520    | 360 | 622 | 619 | 550 | 649 | 649 | 676 | 710 | 367 | 862.45 | 202 | 299 | 294 | 284 | 338 | 338 | 349 | 373 | 203 |
| 520.35 | 367 | 619 | 620 | 550 | 638 | 638 | 675 | 707 | 371 | 862.76 | 202 | 299 | 295 | 282 | 336 | 336 | 344 | 367 | 203 |
| 520.71 | 368 | 619 | 608 | 541 | 636 | 636 | 677 | 704 | 378 | 863.07 | 204 | 300 | 299 | 281 | 335 | 335 | 349 | 371 | 206 |
| 521.07 | 372 | 622 | 606 | 539 | 642 | 642 | 680 | 697 | 385 | 863.38 | 198 | 297 | 299 | 279 | 336 | 336 | 347 | 368 | 205 |
| 521.42 | 371 | 621 | 603 | 541 | 645 | 645 | 680 | 698 | 387 | 863.69 | 200 | 300 | 303 | 282 | 339 | 339 | 352 | 375 | 206 |
| 521.78 | 371 | 617 | 615 | 543 | 642 | 642 | 676 | 699 | 384 | 864    | 200 | 298 | 300 | 281 | 340 | 340 | 347 | 374 | 204 |
| 522.13 | 363 | 606 | 615 | 540 | 636 | 636 | 671 | 694 | 380 | 864.31 | 204 | 295 | 299 | 280 | 336 | 336 | 350 | 371 | 204 |
| 522.49 | 365 | 603 | 618 | 532 | 627 | 627 | 665 | 689 | 372 | 864.62 | 206 | 294 | 293 | 279 | 332 | 332 | 348 | 367 | 205 |
| 522.84 | 360 | 605 | 608 | 527 | 620 | 620 | 661 | 683 | 372 | 864.93 | 207 | 295 | 293 | 275 | 327 | 327 | 349 | 366 | 206 |
| 523.2  | 363 | 607 | 603 | 520 | 613 | 613 | 665 | 681 | 372 | 865.24 | 203 | 296 | 291 | 274 | 328 | 328 | 348 | 365 | 203 |
| 523.56 | 359 | 604 | 602 | 524 | 613 | 613 | 668 | 673 | 378 | 865.55 | 197 | 293 | 292 | 272 | 324 | 324 | 347 | 362 | 198 |
| 523.91 | 367 | 604 | 604 | 528 | 615 | 615 | 672 | 671 | 381 | 865.86 | 195 | 296 | 293 | 280 | 328 | 328 | 347 | 362 | 198 |
| 524.27 | 366 | 608 | 602 | 524 | 614 | 614 | 667 | 662 | 382 | 866.17 | 196 | 292 | 294 | 276 | 326 | 326 | 341 | 357 | 199 |
| 524.62 | 365 | 603 | 597 | 516 | 604 | 604 | 667 | 660 | 377 | 866.48 | 196 | 293 | 293 | 271 | 323 | 323 | 338 | 356 | 201 |
| 524.98 | 363 | 596 | 592 | 512 | 595 | 595 | 666 | 653 | 376 | 866.79 | 196 | 288 | 292 | 264 | 324 | 324 | 337 | 350 | 200 |
| 525.33 | 369 | 591 | 590 | 519 | 583 | 583 | 669 | 653 | 376 | 867.1  | 194 | 293 | 292 | 267 | 328 | 328 | 338 | 351 | 202 |
| 525.69 | 366 | 585 | 584 | 515 | 582 | 582 | 664 | 643 | 373 | 867.41 | 194 | 291 | 292 | 271 | 330 | 330 | 335 | 352 | 201 |
| 526.04 | 370 | 584 | 592 | 516 | 575 | 575 | 661 | 642 | 376 | 867.72 | 192 | 287 | 289 | 273 | 323 | 323 | 331 | 352 | 200 |
| 526.4  | 371 | 580 | 590 | 508 | 574 | 574 | 654 | 638 | 373 | 868.04 | 194 | 284 | 287 | 271 | 318 | 318 | 328 | 352 | 197 |
| 526.76 | 376 | 583 | 594 | 509 | 571 | 571 | 659 | 634 | 377 | 868.35 | 193 | 280 | 285 | 270 | 315 | 315 | 327 | 348 | 197 |
| 527.11 | 374 | 578 | 586 | 501 | 573 | 573 | 657 | 631 | 377 | 868.65 | 192 | 279 | 280 | 265 | 319 | 319 | 324 | 348 | 195 |
| 527.47 | 374 | 572 | 582 | 497 | 566 | 566 | 651 | 626 | 374 | 868.96 | 189 | 278 | 274 | 263 | 315 | 315 | 325 | 344 | 192 |
| 527.82 | 374 | 569 | 576 | 493 | 558 | 558 | 638 | 619 | 375 | 869.27 | 187 | 278 | 273 | 262 | 315 | 315 | 327 | 343 | 193 |
| 528.18 | 371 | 568 | 574 | 494 | 550 | 550 | 634 | 612 | 374 | 869.58 | 188 | 280 | 278 | 263 | 310 | 310 | 324 | 337 | 193 |
| 528.53 | 367 | 559 | 567 | 489 | 542 | 542 | 631 | 597 | 374 | 869.89 | 188 | 276 | 278 | 261 | 310 | 310 | 323 | 336 | 195 |
| 528.89 | 360 | 548 | 559 | 485 | 530 | 530 | 626 | 588 | 367 | 870.2  | 191 | 275 | 274 | 260 | 309 | 309 | 317 | 333 | 195 |
| 529.24 | 358 | 541 | 544 | 473 | 520 | 520 | 620 | 581 | 362 | 870.51 | 191 | 272 | 272 | 257 | 306 | 306 | 320 | 335 | 197 |
| 529.6  | 360 | 539 | 543 | 470 | 515 | 515 | 621 | 582 | 362 | 870.82 | 191 | 273 | 272 | 254 | 307 | 307 | 317 | 335 | 195 |
| 529.95 | 370 | 536 | 546 | 469 | 516 | 516 | 626 | 587 | 365 | 871.13 | 190 | 271 | 275 | 252 | 303 | 303 | 317 | 333 | 192 |
| 530.31 | 370 | 534 | 548 | 470 | 518 | 518 | 623 | 578 | 363 | 871.44 | 191 | 272 | 277 | 253 | 304 | 304 | 316 | 330 | 196 |
| 530.66 | 370 | 532 | 547 | 468 | 518 | 518 | 621 | 566 | 361 | 871.75 | 188 | 268 | 274 | 253 | 300 | 300 | 312 | 327 | 196 |
| 531.02 | 365 | 530 | 544 | 462 | 513 | 513 | 617 | 555 | 361 | 872.06 | 188 | 270 | 274 | 253 | 299 | 299 | 306 | 327 | 197 |
| 531.37 | 369 | 526 | 547 | 462 | 507 | 507 | 619 | 556 | 365 | 872.37 | 188 | 267 | 270 | 250 | 298 | 298 | 306 | 328 | 191 |
| 531.73 | 367 | 524 | 542 | 462 | 503 | 503 | 619 | 562 | 360 | 872.68 | 189 | 267 | 271 | 249 | 296 | 296 | 308 | 327 | 190 |
| 532.08 | 369 | 521 | 543 | 459 | 494 | 494 | 619 | 561 | 363 | 872.99 | 187 | 263 | 265 | 247 | 293 | 293 | 308 | 322 | 186 |
| 532.43 | 363 | 515 | 543 | 455 | 490 | 490 | 611 | 548 | 360 | 873.3  | 187 | 263 | 263 | 248 | 293 | 293 | 307 | 322 | 187 |
| 532.79 | 365 | 518 | 542 | 455 | 485 | 485 | 609 | 536 | 369 | 873.61 | 187 | 260 | 267 | 251 | 295 | 295 | 304 | 324 | 190 |
| 533.14 | 362 | 519 | 533 | 456 | 484 | 484 | 602 | 535 | 369 | 873.92 | 184 | 260 | 266 | 251 | 293 | 293 | 303 | 322 | 193 |
| 533.5  | 362 | 519 | 526 | 453 | 473 | 473 | 602 | 532 | 367 | 874.22 | 181 | 257 | 265 | 250 | 289 | 289 | 300 | 316 | 192 |
| 533.85 | 360 | 509 | 524 | 455 | 470 | 470 | 598 | 536 | 367 | 874.53 | 183 | 261 | 261 | 247 | 286 | 286 | 300 | 311 | 190 |
| 534.21 | 362 | 505 | 533 | 447 | 467 | 467 | 597 | 535 | 365 | 874.84 | 184 | 259 | 258 | 247 | 285 | 285 | 298 | 312 | 190 |
| 534.56 | 367 | 500 | 538 | 446 | 466 | 466 | 598 | 535 | 371 | 875.15 | 184 | 260 | 256 | 243 | 283 | 283 | 294 | 307 | 188 |
| 534.92 | 368 | 501 | 535 | 433 | 461 | 461 | 593 | 523 | 366 | 875.46 | 184 | 258 | 253 | 243 | 281 | 281 | 296 | 304 | 189 |
| 535.27 | 366 | 497 | 527 | 432 | 456 | 456 | 593 | 513 | 363 | 875.77 | 187 | 256 | 254 | 244 | 281 | 281 | 298 | 305 | 189 |
| 535.63 | 358 | 496 | 519 | 426 | 449 | 449 | 583 | 504 | 354 | 876.08 | 191 | 258 | 257 | 245 | 284 | 284 | 300 | 311 | 192 |
| 535.98 | 360 | 498 | 520 | 434 | 450 | 450 | 589 | 509 | 357 | 876.39 | 189 | 256 | 255 | 241 | 286 | 286 | 294 | 312 | 189 |
| 536.33 | 361 | 498 | 520 | 433 | 448 | 448 | 586 | 508 | 352 | 876.7  | 187 | 253 | 253 | 238 | 283 | 283 | 293 | 310 | 186 |
| 536.69 | 369 | 496 | 518 | 430 | 454 | 454 | 590 | 514 | 351 | 877    | 182 | 254 | 253 | 239 | 280 | 280 | 292 | 308 | 185 |
| 537.04 | 369 | 491 | 517 | 431 | 454 | 454 | 583 | 510 | 352 | 877.31 | 180 | 254 | 250 | 240 | 278 | 278 | 293 | 307 | 187 |
| 537.4  | 368 | 492 | 515 | 435 | 457 | 457 | 586 | 510 | 358 | 877.62 | 181 | 254 | 252 | 239 | 278 | 278 | 289 | 302 | 189 |
| 537.75 | 368 | 496 | 516 | 445 | 456 | 456 | 587 | 510 | 367 | 877.93 | 181 | 249 | 250 | 235 | 275 | 275 | 285 | 298 | 187 |
| 538.11 | 371 | 497 | 512 | 440 | 451 | 451 | 586 | 506 | 365 | 878.24 | 182 | 247 | 252 | 234 | 272 | 272 | 285 | 296 | 185 |
| 538.46 | 374 | 498 | 515 | 440 | 450 | 450 | 584 | 507 | 371 | 878.55 | 180 | 247 | 251 | 233 | 270 | 270 | 285 | 299 | 184 |
| 538.81 | 374 | 498 | 516 | 432 | 446 | 446 | 580 | 504 | 368 | 878.85 | 180 | 242 | 249 | 231 | 269 | 269 | 281 | 298 | 182 |
| 539.17 | 373 | 501 | 522 | 431 | 451 | 451 | 584 | 512 | 371 | 879.16 | 176 | 241 | 245 | 228 | 266 | 266 | 275 | 294 | 180 |
| 539.52 | 372 | 499 | 519 | 432 | 450 | 450 | 575 | 510 | 366 | 879.47 | 177 | 243 | 242 | 229 | 267 | 267 | 275 | 289 | 180 |
| 539.88 | 370 | 499 | 523 | 437 | 453 | 453 | 571 | 511 | 367 | 879.78 | 177 | 246 | 241 | 229 | 268 | 268 | 279 | 289 | 185 |
| 540.23 | 365 | 496 | 521 | 436 | 449 | 449 | 564 | 505 | 361 | 880.09 | 179 | 244 | 240 | 229 | 270 | 270 | 279 | 287 | 184 |
| 540.58 | 362 | 496 | 521 | 430 | 450 | 450 | 564 | 499 | 356 | 880.39 | 177 | 241 | 238 | 226 | 266 | 266 | 275 | 286 | 181 |
| 540.94 | 361 | 494 | 518 | 426 | 447 | 447 | 564 | 499 | 352 | 880.7  | 177 | 240 | 238 | 226 | 266 | 266 | 272 | 283 | 182 |
| 541.29 | 362 | 495 | 515 | 424 | 443 | 443 | 564 | 500 | 353 | 881.01 | 180 | 244 | 241 | 228 | 263 | 263 | 274 | 287 | 185 |
| 541.64 | 362 | 489 | 517 | 427 | 436 | 436 | 564 | 506 | 356 | 881.32 | 182 | 242 | 240 | 228 | 264 | 264 | 278 | 285 | 184 |
| 542    | 365 | 492 | 512 | 431 | 437 | 437 | 569 | 506 | 361 | 881.63 | 179 | 243 | 240 | 227 | 260 | 260 | 278 | 287 | 180 |
| 542.35 | 370 | 494 | 515 | 437 | 442 | 442 | 568 | 509 | 361 | 881.93 | 180 | 240 | 240 | 226 | 263 | 263 | 277 | 287 | 179 |
| 542.71 | 371 | 500 | 512 | 440 | 452 | 452 | 568 | 511 | 365 | 882.24 | 180 | 242 | 243 | 226 | 263 | 263 | 273 | 288 | 179 |
| 543.06 | 364 | 499 | 513 | 438 | 447 | 447 | 562 | 510 | 361 | 882.55 | 182 | 238 | 242 | 223 | 264 | 264 | 270 | 290 | 176 |
| 543.41 | 359 | 497 | 516 | 439 | 447 | 447 | 566 | 512 | 365 | 882.86 | 178 | 237 | 242 | 223 | 261 | 261 | 266 | 287 | 177 |
| 543.77 | 362 | 502 | 522 | 446 | 448 | 448 | 573 | 512 | 365 | 883.16 | 175 | 237 | 237 | 220 | 255 | 255 | 268 | 284 | 180 |
| 544.12 | 374 | 507 | 533 | 453 | 458 | 458 | 578 | 518 | 369 | 883.47 | 171 | 237 | 234 | 219 | 253 | 253 | 268 | 280 | 182 |
| 544.47 | 375 | 514 | 536 | 449 | 462 | 462 | 577 | 521 | 368 | 883.78 | 172 | 234 | 233 | 217 | 253 | 253 | 267 | 281 | 180 |
| 544.83 | 369 | 514 | 537 | 446 | 462 | 462 | 573 | 528 | 366 | 884.09 | 173 | 232 | 234 | 219 | 260 | 26  |     |     |     |

|        |     |     |     |     |     |     |     |     |     |        |     |     |     |     |     |     |     |     |     |
|--------|-----|-----|-----|-----|-----|-----|-----|-----|-----|--------|-----|-----|-----|-----|-----|-----|-----|-----|-----|
| 548.36 | 376 | 555 | 574 | 495 | 524 | 524 | 581 | 593 | 372 | 887.16 | 173 | 231 | 231 | 217 | 251 | 251 | 261 | 274 | 181 |
| 548.71 | 375 | 559 | 581 | 498 | 527 | 527 | 579 | 598 | 371 | 887.46 | 177 | 232 | 232 | 217 | 250 | 250 | 262 | 269 | 180 |
| 549.06 | 374 | 565 | 583 | 497 | 527 | 527 | 581 | 601 | 373 | 887.77 | 177 | 228 | 228 | 217 | 248 | 248 | 261 | 270 | 175 |
| 549.42 | 375 | 570 | 590 | 502 | 535 | 535 | 584 | 609 | 376 | 888.08 | 179 | 231 | 226 | 213 | 246 | 246 | 258 | 272 | 178 |
| 549.77 | 375 | 574 | 591 | 501 | 542 | 542 | 592 | 615 | 376 | 888.38 | 178 | 233 | 225 | 212 | 247 | 247 | 259 | 274 | 180 |
| 550.12 | 372 | 580 | 595 | 512 | 555 | 555 | 598 | 622 | 388 | 888.69 | 178 | 230 | 228 | 213 | 245 | 245 | 260 | 274 | 182 |
| 550.48 | 373 | 590 | 598 | 518 | 557 | 557 | 604 | 629 | 389 | 889    | 177 | 230 | 227 | 217 | 251 | 251 | 262 | 273 | 182 |
| 550.83 | 378 | 591 | 598 | 524 | 561 | 561 | 607 | 634 | 391 | 889.3  | 177 | 226 | 225 | 217 | 252 | 252 | 259 | 274 | 181 |
| 551.18 | 382 | 599 | 607 | 525 | 565 | 565 | 608 | 642 | 385 | 889.61 | 177 | 232 | 223 | 221 | 255 | 255 | 261 | 273 | 179 |
| 551.53 | 382 | 600 | 609 | 523 | 571 | 571 | 604 | 645 | 386 | 889.91 | 176 | 228 | 222 | 218 | 250 | 250 | 259 | 270 | 177 |
| 551.89 | 386 | 612 | 616 | 531 | 582 | 582 | 606 | 661 | 390 | 890.22 | 174 | 229 | 223 | 217 | 247 | 247 | 258 | 268 | 176 |
| 552.24 | 390 | 622 | 625 | 539 | 597 | 597 | 616 | 672 | 391 | 890.53 | 174 | 224 | 221 | 214 | 244 | 244 | 255 | 264 | 174 |
| 552.59 | 390 | 627 | 631 | 546 | 603 | 603 | 623 | 683 | 391 | 890.83 | 176 | 226 | 224 | 215 | 247 | 247 | 254 | 268 | 174 |
| 552.94 | 388 | 627 | 636 | 551 | 611 | 611 | 627 | 687 | 392 | 891.14 | 175 | 224 | 223 | 215 | 248 | 248 | 253 | 268 | 172 |
| 553.3  | 385 | 622 | 633 | 550 | 613 | 613 | 625 | 687 | 391 | 891.45 | 174 | 224 | 220 | 215 | 247 | 247 | 253 | 270 | 170 |
| 553.65 | 385 | 625 | 637 | 553 | 618 | 618 | 624 | 697 | 389 | 891.75 | 174 | 222 | 223 | 213 | 244 | 244 | 252 | 268 | 173 |
| 554    | 383 | 627 | 635 | 552 | 616 | 616 | 623 | 693 | 386 | 892.06 | 174 | 224 | 224 | 212 | 243 | 243 | 250 | 266 | 174 |
| 554.35 | 389 | 635 | 636 | 557 | 619 | 619 | 621 | 698 | 384 | 892.36 | 175 | 225 | 226 | 210 | 245 | 245 | 253 | 264 | 177 |
| 554.71 | 393 | 637 | 641 | 559 | 627 | 627 | 624 | 701 | 390 | 892.67 | 175 | 225 | 222 | 209 | 244 | 244 | 251 | 261 | 175 |
| 555.06 | 397 | 642 | 647 | 563 | 635 | 635 | 633 | 721 | 393 | 892.97 | 173 | 224 | 222 | 212 | 246 | 246 | 253 | 260 | 174 |
| 555.41 | 394 | 644 | 654 | 563 | 640 | 640 | 636 | 723 | 397 | 893.28 | 175 | 220 | 221 | 209 | 244 | 244 | 251 | 259 | 170 |
| 555.76 | 393 | 650 | 656 | 572 | 642 | 642 | 639 | 725 | 400 | 893.59 | 175 | 223 | 220 | 210 | 245 | 245 | 252 | 259 | 171 |
| 556.12 | 388 | 654 | 656 | 575 | 645 | 645 | 636 | 721 | 398 | 893.89 | 175 | 222 | 219 | 210 | 241 | 241 | 250 | 259 | 173 |
| 556.47 | 390 | 663 | 658 | 581 | 650 | 650 | 643 | 725 | 402 | 894.2  | 173 | 223 | 219 | 211 | 239 | 239 | 247 | 260 | 176 |
| 556.82 | 390 | 665 | 664 | 581 | 655 | 655 | 646 | 738 | 405 | 894.5  | 173 | 219 | 220 | 210 | 239 | 239 | 248 | 260 | 176 |
| 557.17 | 396 | 673 | 671 | 590 | 668 | 668 | 653 | 743 | 415 | 894.81 | 175 | 218 | 220 | 207 | 241 | 241 | 250 | 263 | 177 |
| 557.52 | 391 | 677 | 676 | 591 | 674 | 674 | 654 | 751 | 416 | 895.11 | 175 | 220 | 220 | 207 | 245 | 245 | 252 | 258 | 178 |
| 557.88 | 398 | 686 | 678 | 596 | 683 | 683 | 663 | 750 | 414 | 895.42 | 169 | 215 | 214 | 203 | 238 | 238 | 245 | 254 | 173 |
| 558.23 | 402 | 685 | 688 | 594 | 680 | 680 | 665 | 758 | 414 | 895.72 | 169 | 213 | 212 | 202 | 237 | 237 | 243 | 254 | 171 |
| 558.58 | 407 | 684 | 694 | 597 | 686 | 686 | 672 | 756 | 414 | 896.03 | 166 | 208 | 212 | 203 | 233 | 233 | 240 | 255 | 168 |
| 558.93 | 408 | 681 | 698 | 598 | 685 | 685 | 673 | 762 | 417 | 896.34 | 167 | 212 | 214 | 206 | 237 | 237 | 242 | 259 | 169 |
| 559.28 | 407 | 683 | 696 | 598 | 689 | 689 | 675 | 764 | 414 | 896.64 | 168 | 218 | 214 | 207 | 238 | 238 | 243 | 257 | 170 |
| 559.64 | 406 | 684 | 690 | 599 | 677 | 677 | 674 | 770 | 410 | 896.95 | 171 | 222 | 212 | 204 | 237 | 237 | 245 | 258 | 173 |
| 559.99 | 398 | 686 | 685 | 597 | 680 | 680 | 669 | 770 | 403 | 897.25 | 177 | 225 | 219 | 208 | 240 | 240 | 252 | 261 | 177 |
| 560.34 | 394 | 685 | 685 | 601 | 679 | 679 | 669 | 766 | 406 | 897.56 | 175 | 220 | 222 | 207 | 239 | 239 | 252 | 259 | 174 |
| 560.69 | 390 | 682 | 690 | 599 | 682 | 682 | 666 | 765 | 406 | 897.86 | 174 | 215 | 222 | 204 | 237 | 237 | 246 | 253 | 170 |
| 561.04 | 393 | 681 | 691 | 603 | 678 | 678 | 667 | 763 | 412 | 898.17 | 171 | 212 | 216 | 202 | 237 | 237 | 242 | 248 | 169 |
| 561.39 | 396 | 679 | 692 | 604 | 677 | 677 | 668 | 759 | 410 | 898.47 | 170 | 213 | 214 | 201 | 239 | 239 | 240 | 247 | 169 |
| 561.75 | 400 | 684 | 697 | 609 | 684 | 684 | 668 | 766 | 411 | 898.77 | 170 | 215 | 213 | 203 | 238 | 238 | 241 | 248 | 170 |
| 562.1  | 401 | 686 | 698 | 602 | 684 | 684 | 664 | 762 | 407 | 899.08 | 170 | 218 | 214 | 202 | 235 | 235 | 242 | 249 | 169 |
| 562.45 | 402 | 688 | 694 | 597 | 684 | 684 | 662 | 766 | 407 | 899.38 | 171 | 218 | 213 | 204 | 233 | 233 | 242 | 250 | 167 |
| 562.8  | 406 | 685 | 689 | 597 | 680 | 680 | 670 | 763 | 411 | 899.69 | 172 | 217 | 216 | 205 | 232 | 232 | 243 | 252 | 168 |
| 563.15 | 404 | 678 | 685 | 599 | 674 | 674 | 685 | 769 | 415 | 899.99 | 171 | 216 | 215 | 206 | 229 | 229 | 241 | 254 | 169 |
| 563.5  | 407 | 679 | 689 | 602 | 670 | 670 | 689 | 769 | 421 | 900.3  | 171 | 215 | 217 | 205 | 228 | 228 | 242 | 256 | 173 |
| 563.85 | 404 | 680 | 693 | 600 | 667 | 667 | 689 | 762 | 418 | 900.6  | 170 | 215 | 215 | 206 | 228 | 228 | 243 | 255 | 173 |
| 564.21 | 413 | 680 | 699 | 596 | 673 | 673 | 695 | 756 | 416 | 900.91 | 170 | 213 | 215 | 204 | 229 | 229 | 241 | 254 | 173 |
| 564.56 | 408 | 682 | 696 | 594 | 667 | 667 | 698 | 753 | 416 | 901.21 | 171 | 214 | 216 | 203 | 231 | 231 | 237 | 247 | 170 |
| 564.91 | 412 | 676 | 689 | 589 | 666 | 666 | 696 | 752 | 414 | 901.52 | 169 | 213 | 213 | 202 | 232 | 232 | 235 | 246 | 168 |
| 565.26 | 411 | 684 | 680 | 590 | 659 | 659 | 690 | 748 | 419 | 901.82 | 167 | 213 | 213 | 201 | 232 | 232 | 237 | 246 | 167 |
| 565.61 | 417 | 682 | 680 | 586 | 658 | 658 | 692 | 745 | 422 | 902.12 | 167 | 211 | 210 | 202 | 231 | 231 | 237 | 250 | 167 |
| 565.96 | 417 | 685 | 679 | 586 | 650 | 650 | 696 | 739 | 425 | 902.43 | 169 | 208 | 211 | 206 | 230 | 230 | 238 | 251 | 167 |
| 566.31 | 412 | 680 | 679 | 584 | 643 | 643 | 697 | 734 | 422 | 902.73 | 170 | 211 | 211 | 205 | 230 | 230 | 238 | 250 | 167 |
| 566.66 | 412 | 677 | 674 | 576 | 639 | 639 | 704 | 725 | 422 | 903.04 | 169 | 212 | 213 | 208 | 231 | 231 | 240 | 251 | 170 |
| 567.02 | 404 | 667 | 673 | 576 | 632 | 632 | 698 | 715 | 422 | 903.34 | 170 | 213 | 213 | 208 | 229 | 229 | 239 | 256 | 172 |
| 567.37 | 400 | 654 | 670 | 567 | 622 | 622 | 692 | 708 | 419 | 903.64 | 168 | 212 | 211 | 210 | 230 | 230 | 234 | 252 | 172 |
| 567.72 | 396 | 642 | 666 | 568 | 609 | 609 | 678 | 699 | 410 | 903.95 | 167 | 213 | 208 | 205 | 226 | 226 | 231 | 249 | 171 |
| 568.07 | 403 | 645 | 666 | 563 | 606 | 606 | 683 | 700 | 407 | 904.25 | 168 | 215 | 208 | 200 | 228 | 228 | 231 | 242 | 171 |
| 568.42 | 407 | 644 | 662 | 561 | 601 | 601 | 686 | 692 | 409 | 904.56 | 169 | 214 | 209 | 198 | 229 | 229 | 235 | 241 | 170 |
| 568.77 | 407 | 644 | 660 | 555 | 599 | 599 | 683 | 687 | 413 | 904.86 | 182 | 224 | 226 | 209 | 240 | 240 | 247 | 255 | 181 |
| 569.12 | 407 | 634 | 649 | 551 | 589 | 589 | 681 | 673 | 413 | 905.16 | 179 | 221 | 223 | 209 | 237 | 237 | 248 | 255 | 179 |
| 569.47 | 404 | 626 | 645 | 545 | 583 | 583 | 677 | 664 | 409 | 905.47 | 180 | 221 | 223 | 209 | 235 | 235 | 247 | 258 | 182 |
| 569.82 | 408 | 621 | 640 | 544 | 577 | 577 | 682 | 658 | 408 | 905.77 | 170 | 209 | 207 | 198 | 223 | 223 | 237 | 244 | 169 |
| 570.17 | 404 | 612 | 638 | 530 | 566 | 566 | 679 | 652 | 407 | 906.07 | 170 | 207 | 209 | 195 | 228 | 228 | 236 | 243 | 170 |
| 570.52 | 411 | 610 | 639 | 531 | 559 | 559 | 676 | 641 | 413 | 906.38 | 166 | 205 | 208 | 195 | 228 | 228 | 235 | 244 | 167 |
| 570.87 | 408 | 604 | 631 | 523 | 546 | 546 | 672 | 632 | 409 | 906.68 | 165 | 202 | 208 | 196 | 228 | 228 | 234 | 240 | 167 |
| 571.22 | 410 | 603 | 622 | 521 | 542 | 542 | 669 | 623 | 408 | 906.98 | 165 | 204 | 208 | 196 | 221 | 221 | 234 | 241 | 168 |
| 571.57 | 408 | 588 | 609 | 504 | 532 | 532 | 672 | 618 | 403 | 907.29 | 165 | 204 | 205 | 196 | 220 | 220 | 233 | 238 | 167 |
| 571.93 | 406 | 579 | 605 | 500 | 528 | 528 | 669 | 607 | 401 | 907.59 | 163 | 210 | 209 | 196 | 218 | 218 | 229 | 238 | 168 |
| 572.28 | 407 | 573 | 601 | 498 | 523 | 523 | 676 | 605 | 397 | 907.89 | 162 | 211 | 210 | 196 | 220 | 220 | 227 | 237 | 168 |
| 572.63 | 403 | 574 | 600 | 492 | 522 | 522 | 672 | 597 | 398 | 908.2  | 163 | 209 | 211 | 195 | 221 | 221 | 225 | 238 | 169 |
| 572.98 | 403 | 569 | 595 | 485 | 511 | 511 | 676 | 591 | 399 | 908.5  | 166 | 204 | 208 | 196 | 225 | 225 | 229 | 240 | 169 |
| 573.33 | 400 | 560 | 589 | 480 | 508 | 508 | 667 | 579 | 400 | 908.8  | 167 | 200 | 208 | 198 | 226 | 226 | 228 | 240 | 169 |
| 573.68 | 398 | 559 | 585 | 486 | 503 | 503 | 671 | 577 | 402 | 909.11 | 169 | 201 | 211 | 196 | 228 |     |     |     |     |

|        |     |      |      |      |      |      |      |      |     |        |     |     |     |     |     |     |     |     |     |
|--------|-----|------|------|------|------|------|------|------|-----|--------|-----|-----|-----|-----|-----|-----|-----|-----|-----|
| 577.18 | 398 | 543  | 578  | 476  | 481  | 481  | 669  | 555  | 390 | 912.13 | 167 | 195 | 206 | 195 | 218 | 218 | 224 | 235 | 171 |
| 577.53 | 405 | 541  | 581  | 478  | 486  | 486  | 670  | 558  | 389 | 912.43 | 167 | 199 | 204 | 194 | 217 | 217 | 225 | 232 | 168 |
| 577.88 | 402 | 540  | 584  | 477  | 489  | 489  | 675  | 567  | 395 | 912.74 | 169 | 198 | 203 | 193 | 219 | 219 | 228 | 232 | 166 |
| 578.23 | 404 | 544  | 580  | 480  | 494  | 494  | 676  | 572  | 398 | 913.04 | 165 | 199 | 199 | 193 | 217 | 217 | 224 | 232 | 162 |
| 578.58 | 405 | 556  | 586  | 483  | 497  | 497  | 680  | 583  | 402 | 913.34 | 165 | 198 | 200 | 193 | 216 | 216 | 224 | 236 | 163 |
| 578.93 | 405 | 561  | 588  | 488  | 504  | 504  | 684  | 588  | 398 | 913.64 | 163 | 199 | 198 | 191 | 212 | 212 | 222 | 234 | 162 |
| 579.28 | 405 | 575  | 597  | 492  | 509  | 509  | 695  | 597  | 395 | 913.95 | 165 | 197 | 198 | 190 | 212 | 212 | 223 | 232 | 163 |
| 579.63 | 404 | 581  | 601  | 496  | 519  | 519  | 695  | 604  | 394 | 914.25 | 165 | 197 | 200 | 189 | 214 | 214 | 222 | 231 | 161 |
| 579.98 | 410 | 592  | 610  | 501  | 531  | 531  | 702  | 613  | 404 | 914.55 | 165 | 197 | 202 | 190 | 213 | 213 | 222 | 230 | 162 |
| 580.33 | 408 | 597  | 613  | 508  | 543  | 543  | 701  | 622  | 406 | 914.85 | 166 | 200 | 203 | 191 | 212 | 212 | 224 | 233 | 164 |
| 580.67 | 412 | 607  | 621  | 518  | 555  | 555  | 721  | 638  | 413 | 915.15 | 164 | 198 | 199 | 187 | 208 | 208 | 222 | 227 | 162 |
| 581.02 | 414 | 618  | 630  | 530  | 563  | 563  | 731  | 660  | 408 | 915.46 | 165 | 200 | 195 | 185 | 209 | 209 | 222 | 228 | 163 |
| 581.37 | 418 | 623  | 641  | 539  | 576  | 576  | 742  | 680  | 409 | 915.76 | 164 | 198 | 195 | 182 | 209 | 209 | 219 | 226 | 165 |
| 581.72 | 415 | 630  | 652  | 548  | 588  | 588  | 747  | 692  | 412 | 916.06 | 163 | 197 | 195 | 183 | 212 | 212 | 215 | 226 | 166 |
| 582.07 | 407 | 635  | 659  | 558  | 607  | 607  | 751  | 700  | 416 | 916.36 | 162 | 194 | 197 | 186 | 211 | 211 | 214 | 224 | 165 |
| 582.42 | 412 | 648  | 668  | 570  | 621  | 621  | 759  | 715  | 417 | 916.66 | 163 | 192 | 199 | 189 | 210 | 210 | 214 | 224 | 162 |
| 582.77 | 411 | 671  | 679  | 580  | 640  | 640  | 766  | 730  | 418 | 916.96 | 163 | 189 | 196 | 186 | 206 | 206 | 214 | 223 | 162 |
| 583.12 | 418 | 684  | 693  | 593  | 658  | 658  | 776  | 758  | 427 | 917.27 | 160 | 188 | 194 | 182 | 205 | 205 | 214 | 220 | 161 |
| 583.47 | 416 | 699  | 702  | 604  | 679  | 679  | 783  | 778  | 430 | 917.57 | 160 | 190 | 191 | 180 | 209 | 209 | 213 | 218 | 162 |
| 583.82 | 421 | 700  | 712  | 614  | 697  | 697  | 796  | 802  | 432 | 917.87 | 163 | 194 | 196 | 185 | 213 | 213 | 219 | 223 | 165 |
| 584.17 | 422 | 712  | 716  | 621  | 711  | 711  | 798  | 818  | 432 | 918.17 | 164 | 194 | 198 | 187 | 213 | 213 | 216 | 227 | 165 |
| 584.52 | 422 | 726  | 730  | 641  | 734  | 734  | 808  | 840  | 437 | 918.47 | 164 | 193 | 199 | 189 | 210 | 210 | 220 | 232 | 165 |
| 584.87 | 423 | 744  | 739  | 655  | 755  | 755  | 810  | 855  | 434 | 918.77 | 161 | 192 | 197 | 187 | 207 | 207 | 216 | 227 | 163 |
| 585.21 | 422 | 761  | 755  | 667  | 781  | 781  | 827  | 875  | 433 | 919.07 | 165 | 191 | 196 | 187 | 209 | 209 | 214 | 227 | 163 |
| 585.56 | 425 | 781  | 766  | 679  | 798  | 798  | 846  | 896  | 434 | 919.37 | 164 | 190 | 195 | 186 | 209 | 209 | 212 | 221 | 161 |
| 585.91 | 427 | 786  | 775  | 698  | 816  | 816  | 859  | 925  | 434 | 919.68 | 163 | 188 | 193 | 185 | 209 | 209 | 212 | 224 | 160 |
| 586.26 | 427 | 803  | 794  | 717  | 835  | 835  | 876  | 950  | 438 | 919.98 | 159 | 185 | 192 | 180 | 206 | 206 | 212 | 219 | 160 |
| 586.61 | 424 | 805  | 805  | 726  | 855  | 855  | 874  | 962  | 441 | 920.28 | 158 | 183 | 189 | 178 | 204 | 204 | 212 | 220 | 161 |
| 586.96 | 425 | 825  | 823  | 733  | 883  | 883  | 890  | 980  | 449 | 920.58 | 157 | 183 | 190 | 179 | 201 | 201 | 210 | 218 | 161 |
| 587.31 | 431 | 838  | 833  | 746  | 907  | 907  | 895  | 1003 | 456 | 920.88 | 157 | 183 | 187 | 180 | 200 | 200 | 208 | 217 | 161 |
| 587.66 | 434 | 851  | 846  | 754  | 927  | 927  | 910  | 1027 | 458 | 921.18 | 156 | 184 | 187 | 181 | 199 | 199 | 205 | 217 | 162 |
| 588.01 | 442 | 866  | 863  | 772  | 945  | 945  | 922  | 1052 | 463 | 921.48 | 158 | 183 | 183 | 179 | 201 | 201 | 203 | 216 | 163 |
| 588.35 | 438 | 879  | 875  | 779  | 961  | 961  | 927  | 1070 | 463 | 921.78 | 161 | 182 | 188 | 184 | 205 | 205 | 206 | 218 | 163 |
| 588.7  | 439 | 903  | 888  | 790  | 979  | 979  | 935  | 1089 | 471 | 922.08 | 160 | 179 | 188 | 183 | 207 | 207 | 208 | 216 | 162 |
| 589.05 | 433 | 914  | 895  | 800  | 998  | 998  | 940  | 1096 | 471 | 922.38 | 158 | 181 | 190 | 180 | 204 | 204 | 208 | 216 | 159 |
| 589.4  | 433 | 925  | 894  | 809  | 1013 | 1013 | 949  | 1105 | 468 | 922.68 | 157 | 181 | 189 | 177 | 200 | 200 | 204 | 213 | 159 |
| 589.75 | 432 | 929  | 902  | 822  | 1033 | 1033 | 961  | 1125 | 464 | 922.98 | 157 | 180 | 187 | 175 | 198 | 198 | 201 | 207 | 158 |
| 590.1  | 435 | 933  | 906  | 821  | 1047 | 1047 | 966  | 1147 | 466 | 923.28 | 157 | 177 | 187 | 176 | 198 | 198 | 201 | 206 | 159 |
| 590.45 | 437 | 940  | 921  | 826  | 1061 | 1061 | 974  | 1166 | 472 | 923.58 | 154 | 177 | 183 | 174 | 196 | 196 | 199 | 203 | 157 |
| 590.79 | 443 | 939  | 933  | 833  | 1073 | 1073 | 979  | 1181 | 479 | 923.88 | 156 | 179 | 181 | 173 | 197 | 197 | 201 | 208 | 157 |
| 591.14 | 442 | 946  | 945  | 847  | 1088 | 1088 | 983  | 1192 | 479 | 924.19 | 156 | 180 | 179 | 173 | 197 | 197 | 199 | 205 | 156 |
| 591.49 | 451 | 959  | 963  | 871  | 1101 | 1101 | 999  | 1214 | 482 | 924.49 | 158 | 178 | 179 | 171 | 198 | 198 | 200 | 206 | 156 |
| 591.84 | 449 | 979  | 970  | 879  | 1110 | 1110 | 1005 | 1224 | 480 | 924.79 | 158 | 177 | 179 | 169 | 191 | 191 | 197 | 204 | 155 |
| 592.19 | 455 | 1000 | 978  | 886  | 1122 | 1122 | 1011 | 1242 | 485 | 925.09 | 157 | 180 | 184 | 171 | 191 | 191 | 198 | 204 | 155 |
| 592.53 | 445 | 1003 | 975  | 879  | 1131 | 1131 | 1013 | 1249 | 484 | 925.39 | 156 | 182 | 185 | 174 | 189 | 189 | 198 | 206 | 157 |
| 592.88 | 450 | 1010 | 977  | 890  | 1147 | 1147 | 1019 | 1259 | 487 | 925.69 | 154 | 181 | 186 | 174 | 191 | 191 | 197 | 208 | 156 |
| 593.23 | 451 | 1013 | 986  | 891  | 1159 | 1159 | 1035 | 1272 | 487 | 925.99 | 153 | 178 | 181 | 170 | 187 | 187 | 193 | 205 | 155 |
| 593.58 | 454 | 1014 | 994  | 898  | 1176 | 1176 | 1042 | 1282 | 487 | 926.29 | 155 | 175 | 182 | 170 | 188 | 188 | 193 | 201 | 155 |
| 593.93 | 453 | 1018 | 1012 | 900  | 1186 | 1186 | 1056 | 1300 | 485 | 926.59 | 154 | 175 | 182 | 169 | 187 | 187 | 192 | 200 | 157 |
| 594.28 | 449 | 1014 | 1011 | 915  | 1197 | 1197 | 1063 | 1311 | 485 | 926.89 | 155 | 175 | 183 | 172 | 187 | 187 | 196 | 202 | 157 |
| 594.62 | 453 | 1026 | 1017 | 918  | 1205 | 1205 | 1071 | 1322 | 490 | 927.18 | 155 | 174 | 180 | 171 | 187 | 187 | 195 | 204 | 155 |
| 594.97 | 459 | 1026 | 1014 | 924  | 1219 | 1219 | 1080 | 1324 | 493 | 927.48 | 156 | 172 | 177 | 173 | 188 | 188 | 195 | 201 | 154 |
| 595.32 | 457 | 1031 | 1025 | 926  | 1228 | 1228 | 1079 | 1330 | 492 | 927.78 | 157 | 171 | 176 | 172 | 187 | 187 | 190 | 199 | 154 |
| 595.67 | 460 | 1031 | 1032 | 929  | 1243 | 1243 | 1089 | 1342 | 492 | 928.08 | 154 | 172 | 175 | 172 | 184 | 184 | 189 | 196 | 155 |
| 596.01 | 458 | 1041 | 1042 | 937  | 1246 | 1246 | 1091 | 1354 | 495 | 928.38 | 152 | 173 | 173 | 169 | 181 | 181 | 187 | 193 | 154 |
| 596.36 | 463 | 1058 | 1048 | 943  | 1254 | 1254 | 1104 | 1350 | 503 | 928.68 | 150 | 172 | 172 | 166 | 182 | 182 | 187 | 195 | 153 |
| 596.71 | 460 | 1068 | 1048 | 950  | 1259 | 1259 | 1105 | 1350 | 503 | 928.98 | 153 | 172 | 173 | 165 | 182 | 182 | 185 | 197 | 153 |
| 597.06 | 464 | 1070 | 1051 | 949  | 1267 | 1267 | 1108 | 1354 | 503 | 929.28 | 154 | 171 | 172 | 164 | 178 | 178 | 184 | 195 | 153 |
| 597.41 | 466 | 1064 | 1054 | 957  | 1281 | 1281 | 1118 | 1372 | 504 | 929.58 | 155 | 170 | 173 | 166 | 179 | 179 | 183 | 193 | 157 |
| 597.75 | 468 | 1067 | 1059 | 970  | 1287 | 1287 | 1129 | 1383 | 507 | 929.88 | 154 | 168 | 174 | 162 | 182 | 182 | 183 | 190 | 158 |
| 598.1  | 467 | 1072 | 1060 | 971  | 1300 | 1300 | 1144 | 1388 | 505 | 930.18 | 155 | 167 | 174 | 163 | 183 | 183 | 183 | 194 | 156 |
| 598.45 | 466 | 1079 | 1057 | 969  | 1297 | 1297 | 1147 | 1393 | 500 | 930.48 | 156 | 169 | 173 | 164 | 184 | 184 | 184 | 196 | 157 |
| 598.8  | 463 | 1077 | 1057 | 967  | 1303 | 1303 | 1153 | 1395 | 500 | 930.78 | 155 | 169 | 170 | 166 | 181 | 181 | 181 | 197 | 155 |
| 599.14 | 470 | 1090 | 1067 | 992  | 1313 | 1313 | 1164 | 1404 | 510 | 931.08 | 152 | 168 | 167 | 165 | 182 | 182 | 180 | 196 | 155 |
| 599.49 | 472 | 1092 | 1074 | 1000 | 1314 | 1314 | 1172 | 1406 | 508 | 931.37 | 151 | 167 | 166 | 165 | 180 | 180 | 180 | 190 | 154 |
| 599.84 | 478 | 1094 | 1082 | 1004 | 1316 | 1316 | 1172 | 1411 | 505 | 931.67 | 151 | 167 | 166 | 166 | 179 | 179 | 181 | 188 | 154 |
| 600.18 | 473 | 1095 | 1080 | 992  | 1312 | 1312 | 1174 | 1418 | 497 | 931.97 | 154 | 171 | 170 | 165 | 178 | 178 | 182 | 188 | 154 |
| 600.53 | 472 | 1107 | 1084 | 991  | 1329 | 1329 | 1178 | 1435 | 505 | 932.27 | 152 | 169 | 170 | 163 | 177 | 177 | 180 | 189 | 154 |
| 600.88 | 464 | 1121 | 1089 | 996  | 1338 | 1338 | 1186 | 1446 | 514 | 932.57 | 153 | 168 | 170 | 164 | 178 | 178 | 181 | 190 | 154 |
| 601.23 | 468 | 1124 | 1098 | 1005 | 1344 | 1344 | 1192 | 1450 | 515 | 932.87 | 157 | 171 | 170 | 167 | 183 | 183 | 183 | 192 | 158 |
| 601.57 | 472 | 1122 | 1099 | 1005 | 1342 | 1342 | 1202 | 1446 | 514 | 933.17 | 158 | 170 | 170 | 170 | 181 | 181 | 182 | 189 | 158 |
| 601.92 | 481 | 1118 | 1101 | 1006 | 1352 | 1352 | 1213 | 1450 | 509 | 9      |     |     |     |     |     |     |     |     |     |

|        |     |      |      |      |      |      |      |      |     |        |     |     |     |     |     |     |     |     |     |
|--------|-----|------|------|------|------|------|------|------|-----|--------|-----|-----|-----|-----|-----|-----|-----|-----|-----|
| 605.74 | 485 | 1142 | 1127 | 1028 | 1377 | 1377 | 1253 | 1506 | 526 | 936.75 | 143 | 154 | 147 | 143 | 160 | 160 | 163 | 163 | 145 |
| 606.08 | 486 | 1141 | 1138 | 1031 | 1370 | 1370 | 1260 | 1503 | 526 | 937.04 | 142 | 152 | 146 | 143 | 159 | 159 | 160 | 163 | 143 |
| 606.43 | 491 | 1148 | 1143 | 1034 | 1382 | 1382 | 1266 | 1518 | 524 | 937.34 | 146 | 153 | 151 | 150 | 161 | 161 | 159 | 167 | 147 |
| 606.78 | 495 | 1160 | 1161 | 1042 | 1393 | 1393 | 1269 | 1512 | 520 | 937.64 | 146 | 150 | 153 | 150 | 160 | 160 | 157 | 167 | 147 |
| 607.12 | 502 | 1165 | 1155 | 1040 | 1406 | 1406 | 1278 | 1518 | 527 | 937.94 | 148 | 149 | 152 | 150 | 159 | 159 | 158 | 167 | 149 |
| 607.47 | 494 | 1168 | 1149 | 1047 | 1407 | 1407 | 1285 | 1514 | 532 | 938.24 | 148 | 148 | 150 | 145 | 160 | 160 | 160 | 164 | 146 |
| 607.82 | 493 | 1169 | 1137 | 1050 | 1410 | 1410 | 1297 | 1516 | 536 | 938.53 | 149 | 147 | 150 | 145 | 158 | 158 | 159 | 162 | 145 |
| 608.16 | 491 | 1169 | 1132 | 1056 | 1422 | 1422 | 1294 | 1512 | 531 | 938.83 | 148 | 147 | 150 | 144 | 156 | 156 | 155 | 161 | 143 |
| 608.51 | 494 | 1166 | 1133 | 1048 | 1420 | 1420 | 1305 | 1515 | 528 | 939.13 | 151 | 150 | 154 | 145 | 155 | 155 | 156 | 160 | 146 |
| 608.85 | 495 | 1164 | 1139 | 1041 | 1415 | 1415 | 1307 | 1519 | 530 | 939.43 | 150 | 150 | 153 | 147 | 156 | 156 | 156 | 159 | 147 |
| 609.2  | 492 | 1173 | 1145 | 1046 | 1416 | 1416 | 1313 | 1525 | 535 | 939.72 | 150 | 149 | 151 | 148 | 155 | 155 | 155 | 157 | 147 |
| 609.55 | 494 | 1180 | 1147 | 1053 | 1421 | 1421 | 1309 | 1515 | 536 | 940.02 | 145 | 145 | 146 | 145 | 150 | 150 | 150 | 153 | 144 |
| 609.89 | 497 | 1186 | 1148 | 1057 | 1436 | 1436 | 1311 | 1528 | 536 | 940.32 | 145 | 143 | 145 | 142 | 146 | 146 | 148 | 152 | 144 |
| 610.24 | 501 | 1177 | 1153 | 1055 | 1439 | 1439 | 1316 | 1535 | 539 | 940.61 | 144 | 142 | 144 | 140 | 147 | 147 | 147 | 153 | 144 |
| 610.59 | 501 | 1178 | 1163 | 1058 | 1433 | 1433 | 1310 | 1546 | 542 | 940.91 | 143 | 140 | 142 | 137 | 147 | 147 | 146 | 153 | 143 |
| 610.93 | 502 | 1178 | 1175 | 1074 | 1426 | 1426 | 1325 | 1553 | 542 | 941.21 | 140 | 139 | 138 | 134 | 146 | 146 | 143 | 149 | 142 |
| 611.28 | 510 | 1182 | 1174 | 1077 | 1432 | 1432 | 1334 | 1556 | 539 | 941.51 | 139 | 139 | 137 | 134 | 144 | 144 | 143 | 148 | 142 |
| 611.62 | 512 | 1193 | 1179 | 1084 | 1441 | 1441 | 1346 | 1568 | 544 | 941.8  | 138 | 140 | 137 | 134 | 143 | 143 | 143 | 148 | 143 |
| 611.97 | 510 | 1193 | 1173 | 1070 | 1449 | 1449 | 1338 | 1565 | 544 | 942.1  | 139 | 140 | 138 | 136 | 145 | 145 | 144 | 149 | 142 |
| 612.31 | 505 | 1201 | 1183 | 1068 | 1440 | 1440 | 1339 | 1560 | 548 | 942.4  | 138 | 138 | 136 | 135 | 145 | 145 | 142 | 145 | 140 |
| 612.66 | 508 | 1194 | 1176 | 1067 | 1442 | 1442 | 1346 | 1563 | 547 | 942.69 | 139 | 137 | 137 | 135 | 143 | 143 | 143 | 143 | 138 |
| 613.01 | 506 | 1196 | 1169 | 1073 | 1440 | 1440 | 1346 | 1555 | 543 | 942.99 | 139 | 137 | 136 | 135 | 139 | 139 | 143 | 142 | 138 |
| 613.35 | 504 | 1196 | 1166 | 1080 | 1445 | 1445 | 1340 | 1556 | 545 | 943.29 | 138 | 137 | 134 | 136 | 138 | 138 | 141 | 142 | 139 |
| 613.7  | 503 | 1199 | 1167 | 1076 | 1450 | 1450 | 1332 | 1544 | 542 | 943.58 | 137 | 135 | 131 | 136 | 138 | 138 | 138 | 143 | 137 |
| 614.04 | 506 | 1194 | 1178 | 1080 | 1457 | 1457 | 1341 | 1556 | 544 | 943.88 | 137 | 134 | 131 | 134 | 138 | 138 | 136 | 143 | 137 |
| 614.39 | 503 | 1197 | 1177 | 1072 | 1454 | 1454 | 1353 | 1562 | 539 | 944.18 | 138 | 134 | 132 | 132 | 138 | 138 | 137 | 142 | 137 |
| 614.74 | 504 | 1199 | 1184 | 1088 | 1453 | 1453 | 1359 | 1580 | 546 | 944.47 | 139 | 134 | 136 | 134 | 138 | 138 | 138 | 140 | 139 |
| 615.08 | 505 | 1194 | 1177 | 1082 | 1451 | 1451 | 1352 | 1574 | 548 | 944.77 | 142 | 134 | 139 | 136 | 141 | 141 | 143 | 143 | 141 |
| 615.43 | 515 | 1199 | 1184 | 1097 | 1460 | 1460 | 1358 | 1583 | 554 | 945.07 | 143 | 134 | 137 | 137 | 140 | 140 | 144 | 143 | 140 |
| 615.77 | 516 | 1202 | 1185 | 1091 | 1467 | 1467 | 1366 | 1588 | 555 | 945.36 | 143 | 136 | 137 | 137 | 142 | 142 | 144 | 143 | 142 |
| 616.12 | 524 | 1222 | 1203 | 1101 | 1481 | 1481 | 1378 | 1606 | 560 | 945.66 | 139 | 134 | 135 | 133 | 139 | 139 | 139 | 139 | 140 |
| 616.46 | 515 | 1214 | 1197 | 1098 | 1478 | 1478 | 1373 | 1601 | 559 | 945.96 | 139 | 135 | 137 | 133 | 139 | 139 | 139 | 141 | 140 |
| 616.81 | 510 | 1208 | 1201 | 1092 | 1476 | 1476 | 1374 | 1595 | 556 | 946.25 | 139 | 135 | 138 | 132 | 138 | 138 | 138 | 143 | 139 |
| 617.15 | 509 | 1200 | 1193 | 1093 | 1467 | 1467 | 1367 | 1592 | 553 | 946.55 | 141 | 138 | 138 | 134 | 139 | 139 | 141 | 145 | 141 |
| 617.5  | 521 | 1203 | 1196 | 1096 | 1478 | 1478 | 1371 | 1596 | 551 | 946.84 | 143 | 138 | 138 | 133 | 141 | 141 | 143 | 146 | 142 |
| 617.84 | 528 | 1208 | 1194 | 1101 | 1480 | 1480 | 1376 | 1599 | 551 | 947.14 | 142 | 138 | 136 | 134 | 143 | 143 | 144 | 146 | 143 |
| 618.19 | 518 | 1214 | 1197 | 1098 | 1483 | 1483 | 1392 | 1596 | 553 | 947.44 | 139 | 134 | 133 | 132 | 142 | 142 | 142 | 142 | 141 |
| 618.53 | 511 | 1222 | 1201 | 1094 | 1483 | 1483 | 1393 | 1601 | 555 | 947.73 | 137 | 131 | 132 | 132 | 140 | 140 | 140 | 140 | 137 |
| 618.88 | 516 | 1231 | 1206 | 1106 | 1496 | 1496 | 1403 | 1609 | 556 | 948.03 | 138 | 131 | 133 | 132 | 139 | 139 | 139 | 140 | 137 |
| 619.22 | 527 | 1229 | 1205 | 1110 | 1493 | 1493 | 1397 | 1618 | 551 | 948.32 | 140 | 132 | 134 | 134 | 140 | 140 | 140 | 143 | 139 |
| 619.57 | 526 | 1222 | 1207 | 1113 | 1487 | 1487 | 1394 | 1621 | 549 | 948.62 | 139 | 134 | 135 | 136 | 141 | 141 | 139 | 143 | 139 |
| 619.91 | 523 | 1212 | 1212 | 1107 | 1492 | 1492 | 1389 | 1618 | 554 | 948.92 | 139 | 135 | 136 | 136 | 140 | 140 | 139 | 144 | 138 |
| 620.26 | 522 | 1212 | 1217 | 1105 | 1502 | 1502 | 1405 | 1617 | 558 | 949.21 | 138 | 134 | 137 | 135 | 139 | 139 | 138 | 143 | 137 |
| 620.6  | 525 | 1220 | 1220 | 1110 | 1509 | 1509 | 1417 | 1627 | 564 | 949.51 | 141 | 136 | 139 | 135 | 142 | 142 | 140 | 145 | 141 |
| 620.95 | 521 | 1228 | 1211 | 1105 | 1506 | 1506 | 1424 | 1627 | 560 | 949.8  | 140 | 137 | 139 | 136 | 145 | 145 | 142 | 147 | 144 |
| 621.29 | 524 | 1236 | 1212 | 1111 | 1502 | 1502 | 1409 | 1617 | 557 | 950.1  | 142 | 138 | 139 | 136 | 144 | 144 | 145 | 148 | 146 |
| 621.64 | 530 | 1238 | 1212 | 1110 | 1509 | 1509 | 1407 | 1601 | 559 | 950.39 | 141 | 138 | 139 | 134 | 140 | 140 | 145 | 147 | 144 |
| 621.98 | 530 | 1236 | 1215 | 1110 | 1503 | 1503 | 1403 | 1599 | 565 | 950.69 | 139 | 137 | 137 | 132 | 136 | 136 | 140 | 143 | 140 |
| 622.33 | 528 | 1239 | 1221 | 1116 | 1508 | 1508 | 1414 | 1626 | 570 | 950.98 | 137 | 135 | 133 | 131 | 135 | 135 | 138 | 141 | 138 |
| 622.67 | 516 | 1240 | 1216 | 1117 | 1499 | 1499 | 1413 | 1633 | 565 | 951.28 | 136 | 133 | 132 | 132 | 137 | 137 | 138 | 140 | 137 |
| 623.02 | 515 | 1242 | 1220 | 1121 | 1491 | 1491 | 1419 | 1636 | 560 | 951.57 | 139 | 133 | 134 | 132 | 141 | 141 | 141 | 143 | 138 |
| 623.36 | 518 | 1243 | 1220 | 1120 | 1497 | 1497 | 1420 | 1624 | 561 | 951.87 | 141 | 134 | 138 | 134 | 145 | 145 | 142 | 146 | 141 |
| 623.71 | 525 | 1240 | 1225 | 1120 | 1500 | 1500 | 1425 | 1630 | 561 | 952.16 | 141 | 136 | 140 | 134 | 145 | 145 | 144 | 149 | 143 |
| 624.05 | 526 | 1241 | 1218 | 1122 | 1511 | 1511 | 1424 | 1626 | 561 | 952.46 | 139 | 136 | 140 | 135 | 144 | 144 | 145 | 149 | 142 |
| 624.4  | 525 | 1236 | 1222 | 1124 | 1510 | 1510 | 1435 | 1632 | 567 | 952.75 | 139 | 135 | 138 | 135 | 140 | 140 | 147 | 148 | 139 |
| 624.74 | 526 | 1237 | 1224 | 1125 | 1514 | 1514 | 1428 | 1625 | 570 | 953.05 | 139 | 133 | 138 | 137 | 141 | 141 | 145 | 147 | 140 |
| 625.08 | 530 | 1238 | 1237 | 1130 | 1514 | 1514 | 1429 | 1635 | 574 | 953.34 | 145 | 136 | 142 | 140 | 145 | 145 | 147 | 150 | 145 |
| 625.43 | 529 | 1240 | 1227 | 1121 | 1511 | 1511 | 1420 | 1630 | 564 | 953.64 | 147 | 139 | 144 | 141 | 148 | 148 | 149 | 151 | 149 |
| 625.77 | 529 | 1246 | 1220 | 1123 | 1512 | 1512 | 1425 | 1642 | 561 | 953.93 | 148 | 139 | 142 | 140 | 144 | 144 | 148 | 148 | 148 |
| 626.12 | 528 | 1242 | 1210 | 1116 | 1507 | 1507 | 1424 | 1645 | 553 | 954.23 | 144 | 136 | 138 | 137 | 141 | 141 | 142 | 145 | 143 |
| 626.46 | 525 | 1241 | 1205 | 1110 | 1497 | 1497 | 1418 | 1645 | 554 | 954.52 | 140 | 136 | 136 | 135 | 141 | 141 | 139 | 144 | 141 |
| 626.81 | 524 | 1236 | 1210 | 1112 | 1493 | 1493 | 1420 | 1634 | 552 | 954.82 | 140 | 139 | 139 | 136 | 145 | 145 | 141 | 147 | 143 |
| 627.15 | 526 | 1238 | 1212 | 1113 | 1497 | 1497 | 1416 | 1628 | 556 | 955.11 | 139 | 141 | 141 | 140 | 148 | 148 | 144 | 150 | 146 |
| 627.49 | 526 | 1234 | 1218 | 1120 | 1499 | 1499 | 1422 | 1630 | 561 | 955.41 | 140 | 140 | 142 | 140 | 147 | 147 | 144 | 150 | 146 |
| 627.84 | 526 | 1232 | 1215 | 1109 | 1504 | 1504 | 1417 | 1628 | 561 | 955.7  | 140 | 138 | 141 | 139 | 145 | 145 | 144 | 147 | 143 |
| 628.18 | 521 | 1235 | 1214 | 1110 | 1510 | 1510 | 1419 | 1623 | 559 | 955.99 | 139 | 135 | 139 | 134 | 142 | 142 | 142 | 143 | 142 |
| 628.53 | 522 | 1234 | 1208 | 1109 | 1505 | 1505 | 1412 | 1618 | 559 | 956.29 | 142 | 137 | 143 | 137 | 144 | 144 | 145 | 146 | 143 |
| 628.87 | 521 | 1237 | 1216 | 1126 | 1506 | 1506 | 1420 | 1629 | 564 | 956.58 | 141 | 139 | 143 | 137 | 144 | 144 | 146 | 148 | 141 |
| 629.21 | 523 | 1239 | 1223 | 1130 | 1508 | 1508 | 1433 | 1638 | 571 | 956.88 | 143 | 142 | 146 | 141 | 146 | 146 | 149 | 152 | 141 |
| 629.56 | 519 | 1245 | 1224 | 1124 | 1524 | 1524 | 1440 | 1636 | 561 | 957.17 | 142 | 141 | 144 | 140 | 145 | 145 | 149 |     |     |

|        |     |      |      |      |      |      |      |      |     |        |     |     |     |     |     |     |     |     |     |
|--------|-----|------|------|------|------|------|------|------|-----|--------|-----|-----|-----|-----|-----|-----|-----|-----|-----|
| 634.02 | 515 | 1219 | 1214 | 1103 | 1482 | 1482 | 1422 | 1599 | 555 | 960.99 | 144 | 138 | 141 | 137 | 147 | 147 | 148 | 149 | 142 |
| 634.37 | 518 | 1217 | 1206 | 1113 | 1494 | 1494 | 1414 | 1605 | 556 | 961.28 | 141 | 134 | 141 | 136 | 143 | 143 | 146 | 149 | 139 |
| 634.71 | 525 | 1221 | 1207 | 1114 | 1496 | 1496 | 1406 | 1619 | 555 | 961.58 | 143 | 137 | 144 | 140 | 146 | 146 | 149 | 153 | 142 |
| 635.05 | 526 | 1219 | 1200 | 1110 | 1493 | 1493 | 1412 | 1609 | 559 | 961.87 | 141 | 136 | 142 | 140 | 145 | 145 | 148 | 152 | 140 |
| 635.4  | 523 | 1222 | 1209 | 1108 | 1492 | 1492 | 1423 | 1612 | 561 | 962.16 | 145 | 142 | 142 | 143 | 147 | 147 | 150 | 153 | 143 |
| 635.74 | 521 | 1221 | 1211 | 1103 | 1496 | 1496 | 1428 | 1602 | 560 | 962.46 | 144 | 143 | 141 | 141 | 149 | 149 | 149 | 152 | 143 |
| 636.08 | 517 | 1230 | 1210 | 1110 | 1496 | 1496 | 1418 | 1613 | 549 | 962.75 | 147 | 145 | 145 | 142 | 151 | 151 | 151 | 154 | 146 |
| 636.43 | 516 | 1224 | 1206 | 1100 | 1492 | 1492 | 1408 | 1608 | 545 | 963.04 | 143 | 141 | 142 | 138 | 149 | 149 | 148 | 151 | 142 |
| 636.77 | 514 | 1229 | 1207 | 1110 | 1490 | 1490 | 1410 | 1614 | 549 | 963.33 | 143 | 140 | 142 | 138 | 146 | 146 | 146 | 150 | 143 |
| 637.11 | 518 | 1216 | 1207 | 1106 | 1492 | 1492 | 1412 | 1612 | 553 | 963.63 | 140 | 139 | 138 | 136 | 145 | 145 | 145 | 147 | 140 |
| 637.46 | 520 | 1225 | 1217 | 1108 | 1497 | 1497 | 1416 | 1624 | 555 | 963.92 | 139 | 139 | 140 | 138 | 146 | 146 | 146 | 149 | 141 |
| 637.8  | 526 | 1222 | 1212 | 1105 | 1501 | 1501 | 1417 | 1620 | 556 | 964.21 | 139 | 141 | 141 | 139 | 147 | 147 | 147 | 151 | 141 |
| 638.14 | 521 | 1228 | 1214 | 1102 | 1488 | 1488 | 1417 | 1616 | 555 | 964.51 | 142 | 145 | 145 | 143 | 149 | 149 | 147 | 155 | 143 |
| 638.48 | 516 | 1213 | 1210 | 1103 | 1479 | 1479 | 1418 | 1610 | 555 | 964.8  | 145 | 147 | 146 | 143 | 150 | 150 | 149 | 154 | 144 |
| 638.83 | 517 | 1214 | 1209 | 1098 | 1481 | 1481 | 1409 | 1601 | 551 | 965.09 | 146 | 147 | 144 | 144 | 151 | 151 | 150 | 151 | 143 |
| 639.17 | 523 | 1210 | 1210 | 1099 | 1482 | 1482 | 1406 | 1604 | 557 | 965.38 | 143 | 145 | 142 | 142 | 149 | 149 | 149 | 148 | 143 |
| 639.51 | 522 | 1214 | 1205 | 1095 | 1487 | 1487 | 1405 | 1594 | 554 | 965.68 | 143 | 146 | 143 | 142 | 148 | 148 | 149 | 148 | 144 |
| 639.85 | 511 | 1205 | 1196 | 1090 | 1471 | 1471 | 1402 | 1597 | 550 | 965.97 | 141 | 144 | 142 | 139 | 145 | 145 | 145 | 149 | 144 |
| 640.2  | 504 | 1207 | 1191 | 1083 | 1461 | 1461 | 1403 | 1587 | 545 | 966.26 | 143 | 144 | 143 | 139 | 146 | 146 | 146 | 150 | 143 |
| 640.54 | 509 | 1208 | 1190 | 1090 | 1466 | 1466 | 1407 | 1599 | 547 | 966.55 | 144 | 142 | 141 | 139 | 145 | 145 | 145 | 151 | 141 |
| 640.88 | 514 | 1211 | 1200 | 1096 | 1469 | 1469 | 1406 | 1599 | 549 | 966.85 | 144 | 142 | 140 | 138 | 147 | 147 | 146 | 150 | 141 |
| 641.22 | 520 | 1214 | 1197 | 1098 | 1474 | 1474 | 1409 | 1605 | 554 | 967.14 | 140 | 139 | 138 | 137 | 144 | 144 | 145 | 148 | 142 |
| 641.57 | 519 | 1216 | 1201 | 1095 | 1453 | 1453 | 1398 | 1602 | 551 | 967.43 | 137 | 139 | 138 | 136 | 144 | 144 | 146 | 147 | 140 |
| 641.91 | 522 | 1219 | 1196 | 1084 | 1457 | 1457 | 1408 | 1602 | 555 | 967.72 | 137 | 140 | 138 | 137 | 143 | 143 | 146 | 147 | 141 |
| 642.25 | 519 | 1219 | 1202 | 1088 | 1448 | 1448 | 1407 | 1605 | 553 | 968.01 | 138 | 139 | 139 | 136 | 144 | 144 | 146 | 147 | 140 |
| 642.59 | 517 | 1215 | 1189 | 1080 | 1455 | 1455 | 1407 | 1601 | 549 | 968.31 | 142 | 141 | 143 | 137 | 148 | 148 | 148 | 151 | 143 |
| 642.94 | 517 | 1216 | 1185 | 1089 | 1448 | 1448 | 1405 | 1602 | 541 | 968.6  | 144 | 140 | 143 | 135 | 147 | 147 | 149 | 153 | 141 |
| 643.28 | 521 | 1210 | 1179 | 1078 | 1454 | 1454 | 1404 | 1592 | 540 | 968.89 | 143 | 141 | 142 | 133 | 147 | 147 | 149 | 150 | 140 |
| 643.62 | 519 | 1212 | 1180 | 1086 | 1449 | 1449 | 1401 | 1589 | 545 | 969.18 | 140 | 139 | 139 | 134 | 145 | 145 | 147 | 147 | 138 |
| 643.96 | 515 | 1208 | 1185 | 1082 | 1455 | 1455 | 1399 | 1584 | 546 | 969.47 | 138 | 136 | 137 | 135 | 142 | 142 | 145 | 145 | 137 |
| 644.3  | 507 | 1206 | 1186 | 1090 | 1453 | 1453 | 1394 | 1588 | 545 | 969.76 | 136 | 137 | 136 | 136 | 141 | 141 | 143 | 146 | 137 |
| 644.65 | 505 | 1204 | 1190 | 1087 | 1461 | 1461 | 1396 | 1588 | 543 | 970.06 | 139 | 138 | 136 | 136 | 142 | 142 | 145 | 150 | 139 |
| 644.99 | 508 | 1198 | 1195 | 1089 | 1453 | 1453 | 1399 | 1580 | 546 | 970.35 | 138 | 138 | 136 | 134 | 141 | 141 | 145 | 148 | 137 |
| 645.33 | 511 | 1196 | 1193 | 1085 | 1459 | 1459 | 1399 | 1572 | 544 | 970.64 | 141 | 139 | 138 | 135 | 143 | 143 | 147 | 150 | 138 |
| 645.67 | 515 | 1191 | 1196 | 1082 | 1456 | 1456 | 1392 | 1569 | 542 | 970.93 | 139 | 137 | 136 | 132 | 142 | 142 | 145 | 147 | 137 |
| 646.01 | 515 | 1194 | 1183 | 1072 | 1453 | 1453 | 1381 | 1577 | 545 | 971.22 | 143 | 140 | 139 | 136 | 146 | 146 | 147 | 151 | 143 |
| 646.36 | 510 | 1190 | 1185 | 1070 | 1443 | 1443 | 1376 | 1575 | 543 | 971.51 | 145 | 143 | 140 | 139 | 149 | 149 | 151 | 153 | 146 |
| 646.7  | 504 | 1191 | 1179 | 1073 | 1434 | 1434 | 1378 | 1569 | 547 | 971.81 | 145 | 144 | 142 | 140 | 148 | 148 | 153 | 153 | 147 |
| 647.04 | 504 | 1193 | 1186 | 1079 | 1435 | 1435 | 1390 | 1567 | 542 | 972.1  | 147 | 146 | 142 | 139 | 148 | 148 | 154 | 153 | 146 |
| 647.38 | 511 | 1203 | 1182 | 1087 | 1440 | 1440 | 1394 | 1563 | 548 | 972.39 | 147 | 146 | 143 | 138 | 146 | 146 | 152 | 153 | 144 |
| 647.72 | 513 | 1202 | 1188 | 1079 | 1445 | 1445 | 1400 | 1560 | 546 | 972.68 | 147 | 145 | 142 | 139 | 145 | 145 | 151 | 153 | 145 |
| 648.07 | 509 | 1198 | 1178 | 1075 | 1453 | 1453 | 1388 | 1561 | 542 | 972.97 | 146 | 145 | 145 | 142 | 149 | 149 | 151 | 154 | 146 |
| 648.41 | 503 | 1187 | 1174 | 1071 | 1445 | 1445 | 1380 | 1560 | 532 | 973.26 | 146 | 146 | 148 | 143 | 152 | 152 | 152 | 154 | 146 |
| 648.75 | 506 | 1188 | 1157 | 1061 | 1431 | 1431 | 1368 | 1556 | 530 | 973.55 | 147 | 147 | 148 | 145 | 153 | 153 | 152 | 154 | 145 |
| 649.09 | 506 | 1192 | 1160 | 1066 | 1417 | 1417 | 1362 | 1544 | 529 | 973.84 | 145 | 144 | 144 | 143 | 148 | 148 | 151 | 151 | 142 |
| 649.43 | 515 | 1194 | 1167 | 1063 | 1424 | 1424 | 1370 | 1550 | 537 | 974.13 | 147 | 143 | 142 | 143 | 145 | 145 | 151 | 152 | 142 |
| 649.77 | 509 | 1189 | 1178 | 1072 | 1425 | 1425 | 1377 | 1548 | 532 | 974.42 | 145 | 140 | 140 | 141 | 143 | 143 | 148 | 149 | 142 |
| 650.11 | 508 | 1176 | 1176 | 1071 | 1429 | 1429 | 1381 | 1558 | 530 | 974.71 | 147 | 141 | 140 | 142 | 145 | 145 | 149 | 151 | 144 |
| 650.46 | 501 | 1180 | 1171 | 1071 | 1418 | 1418 | 1375 | 1555 | 526 | 975.01 | 144 | 140 | 139 | 141 | 144 | 144 | 149 | 149 | 144 |
| 650.8  | 496 | 1176 | 1163 | 1072 | 1422 | 1422 | 1373 | 1560 | 526 | 975.3  | 143 | 140 | 140 | 140 | 142 | 142 | 150 | 148 | 143 |
| 651.14 | 493 | 1181 | 1159 | 1072 | 1414 | 1414 | 1372 | 1551 | 532 | 975.59 | 142 | 140 | 139 | 138 | 142 | 142 | 147 | 145 | 139 |
| 651.48 | 486 | 1174 | 1162 | 1068 | 1409 | 1409 | 1376 | 1556 | 530 | 975.88 | 140 | 141 | 137 | 136 | 143 | 143 | 146 | 145 | 137 |
| 651.82 | 492 | 1174 | 1167 | 1065 | 1411 | 1411 | 1373 | 1558 | 532 | 976.17 | 139 | 140 | 136 | 135 | 145 | 145 | 144 | 145 | 136 |
| 652.16 | 493 | 1173 | 1169 | 1058 | 1410 | 1410 | 1364 | 1560 | 528 | 976.46 | 139 | 140 | 138 | 137 | 145 | 145 | 147 | 145 | 139 |
| 652.5  | 501 | 1185 | 1167 | 1060 | 1428 | 1428 | 1358 | 1562 | 540 | 976.75 | 139 | 137 | 138 | 136 | 143 | 143 | 146 | 143 | 139 |
| 652.84 | 504 | 1188 | 1171 | 1077 | 1425 | 1425 | 1367 | 1566 | 546 | 977.04 | 142 | 137 | 140 | 138 | 143 | 143 | 147 | 145 | 141 |
| 653.18 | 508 | 1186 | 1171 | 1077 | 1420 | 1420 | 1372 | 1564 | 547 | 977.33 | 139 | 135 | 137 | 134 | 142 | 142 | 143 | 142 | 138 |
| 653.53 | 504 | 1174 | 1176 | 1076 | 1412 | 1412 | 1374 | 1552 | 536 | 977.62 | 140 | 135 | 137 | 134 | 145 | 145 | 145 | 143 | 140 |
| 653.87 | 499 | 1165 | 1170 | 1057 | 1407 | 1407 | 1363 | 1553 | 528 | 977.91 | 141 | 136 | 137 | 135 | 147 | 147 | 147 | 143 | 141 |
| 654.21 | 499 | 1166 | 1173 | 1055 | 1412 | 1412 | 1365 | 1554 | 528 | 978.2  | 143 | 137 | 140 | 137 | 150 | 150 | 149 | 147 | 144 |
| 654.55 | 497 | 1172 | 1169 | 1053 | 1413 | 1413 | 1361 | 1557 | 527 | 978.49 | 143 | 137 | 140 | 138 | 148 | 148 | 147 | 148 | 144 |
| 654.89 | 502 | 1183 | 1164 | 1067 | 1418 | 1418 | 1364 | 1555 | 531 | 978.78 | 140 | 134 | 141 | 137 | 145 | 145 | 145 | 146 | 145 |
| 655.23 | 503 | 1185 | 1163 | 1067 | 1424 | 1424 | 1366 | 1555 | 530 | 979.07 | 139 | 132 | 141 | 136 | 143 | 143 | 144 | 145 | 145 |
| 655.57 | 508 | 1177 | 1157 | 1068 | 1423 | 1423 | 1368 | 1562 | 537 | 979.36 | 138 | 135 | 141 | 136 | 143 | 143 | 146 | 146 | 146 |
| 655.91 | 505 | 1180 | 1162 | 1060 | 1421 | 1421 | 1365 | 1557 | 532 | 979.65 | 139 | 137 | 139 | 136 | 142 | 142 | 147 | 148 | 144 |
| 656.25 | 499 | 1179 | 1161 | 1062 | 1421 | 1421 | 1358 | 1551 | 533 | 979.94 | 140 | 139 | 137 | 138 | 142 | 142 | 147 | 148 | 141 |
| 656.59 | 501 | 1182 | 1163 | 1061 | 1417 | 1417 | 1371 | 1548 | 532 | 980.23 | 140 | 138 | 136 | 137 | 142 | 142 | 145 | 145 | 138 |
| 656.93 | 505 | 1179 | 1164 | 1057 | 1419 | 1419 | 1374 | 1545 | 535 | 980.52 | 142 | 140 | 138 | 137 | 145 | 145 | 144 | 147 | 140 |
| 657.27 | 504 | 1186 | 1168 | 1055 | 1410 | 1410 | 1377 | 1543 | 535 | 980.81 | 142 | 139 | 140 | 136 | 144 | 144 | 143 | 148 | 141 |
| 657.61 | 497 | 1184 | 1167 | 1054 | 1412 | 1412 | 1365 | 1547 | 528 | 981.1  | 140 | 136 | 139 | 135 | 143 | 143 | 141 |     |     |

|        |     |      |      |      |      |      |      |      |     |         |     |     |     |     |     |     |     |     |     |
|--------|-----|------|------|------|------|------|------|------|-----|---------|-----|-----|-----|-----|-----|-----|-----|-----|-----|
| 662.04 | 498 | 1166 | 1158 | 1046 | 1403 | 1403 | 1362 | 1531 | 535 | 984.85  | 140 | 136 | 137 | 133 | 141 | 141 | 140 | 140 | 140 |
| 662.38 | 503 | 1170 | 1170 | 1047 | 1405 | 1405 | 1367 | 1538 | 536 | 985.14  | 140 | 135 | 136 | 132 | 140 | 140 | 140 | 139 | 138 |
| 662.71 | 494 | 1162 | 1157 | 1037 | 1395 | 1395 | 1358 | 1529 | 529 | 985.43  | 140 | 136 | 137 | 132 | 139 | 139 | 141 | 141 | 139 |
| 663.05 | 492 | 1160 | 1149 | 1036 | 1399 | 1399 | 1356 | 1539 | 522 | 985.72  | 137 | 133 | 135 | 132 | 135 | 135 | 139 | 139 | 137 |
| 663.39 | 481 | 1142 | 1134 | 1037 | 1386 | 1386 | 1349 | 1524 | 517 | 986.01  | 132 | 130 | 131 | 128 | 132 | 132 | 136 | 136 | 136 |
| 663.73 | 485 | 1149 | 1136 | 1044 | 1396 | 1396 | 1358 | 1530 | 525 | 986.3   | 134 | 132 | 132 | 131 | 135 | 135 | 136 | 137 | 138 |
| 664.07 | 481 | 1141 | 1142 | 1045 | 1390 | 1390 | 1353 | 1521 | 527 | 986.58  | 135 | 133 | 131 | 131 | 136 | 136 | 136 | 139 | 139 |
| 664.41 | 493 | 1151 | 1149 | 1043 | 1406 | 1406 | 1356 | 1533 | 535 | 986.87  | 140 | 136 | 135 | 135 | 142 | 142 | 141 | 143 | 141 |
| 664.75 | 494 | 1154 | 1149 | 1043 | 1405 | 1405 | 1355 | 1528 | 531 | 987.16  | 138 | 135 | 136 | 135 | 142 | 142 | 141 | 143 | 141 |
| 665.09 | 495 | 1159 | 1142 | 1042 | 1402 | 1402 | 1357 | 1534 | 529 | 987.45  | 140 | 136 | 138 | 136 | 144 | 144 | 144 | 144 | 142 |
| 665.43 | 489 | 1159 | 1147 | 1045 | 1394 | 1394 | 1357 | 1531 | 525 | 987.74  | 139 | 135 | 136 | 133 | 141 | 141 | 140 | 142 | 140 |
| 665.77 | 487 | 1154 | 1154 | 1043 | 1391 | 1391 | 1358 | 1537 | 524 | 988.03  | 140 | 137 | 135 | 132 | 142 | 142 | 140 | 142 | 140 |
| 666.11 | 490 | 1151 | 1156 | 1045 | 1388 | 1388 | 1353 | 1530 | 520 | 988.31  | 142 | 138 | 135 | 133 | 141 | 141 | 140 | 143 | 139 |
| 666.45 | 496 | 1147 | 1143 | 1052 | 1390 | 1390 | 1356 | 1529 | 518 | 988.6   | 141 | 138 | 137 | 134 | 142 | 142 | 142 | 144 | 140 |
| 666.79 | 501 | 1141 | 1132 | 1056 | 1385 | 1385 | 1350 | 1519 | 517 | 988.89  | 140 | 137 | 136 | 133 | 142 | 142 | 142 | 145 | 139 |
| 667.13 | 504 | 1146 | 1126 | 1058 | 1390 | 1390 | 1349 | 1515 | 518 | 989.18  | 137 | 134 | 132 | 131 | 141 | 141 | 139 | 142 | 138 |
| 667.47 | 502 | 1155 | 1134 | 1047 | 1385 | 1385 | 1343 | 1511 | 524 | 989.47  | 139 | 134 | 133 | 132 | 142 | 142 | 141 | 144 | 140 |
| 667.81 | 497 | 1157 | 1135 | 1041 | 1391 | 1391 | 1350 | 1518 | 525 | 989.75  | 140 | 133 | 133 | 133 | 140 | 140 | 144 | 142 | 141 |
| 668.15 | 493 | 1150 | 1144 | 1035 | 1396 | 1396 | 1356 | 1531 | 530 | 990.04  | 143 | 136 | 138 | 135 | 142 | 142 | 146 | 145 | 145 |
| 668.49 | 494 | 1145 | 1141 | 1040 | 1401 | 1401 | 1360 | 1546 | 528 | 990.33  | 142 | 136 | 136 | 135 | 144 | 144 | 145 | 144 | 145 |
| 668.82 | 493 | 1143 | 1140 | 1041 | 1395 | 1395 | 1344 | 1538 | 528 | 990.62  | 143 | 138 | 136 | 135 | 143 | 143 | 144 | 146 | 145 |
| 669.16 | 494 | 1144 | 1138 | 1045 | 1392 | 1392 | 1345 | 1532 | 521 | 990.9   | 142 | 134 | 133 | 133 | 139 | 139 | 140 | 144 | 141 |
| 669.5  | 493 | 1145 | 1138 | 1042 | 1393 | 1393 | 1346 | 1520 | 518 | 991.19  | 142 | 135 | 134 | 134 | 137 | 137 | 139 | 141 | 139 |
| 669.84 | 495 | 1149 | 1139 | 1042 | 1398 | 1398 | 1365 | 1528 | 515 | 991.48  | 138 | 134 | 134 | 132 | 138 | 138 | 137 | 138 | 138 |
| 670.18 | 493 | 1146 | 1136 | 1040 | 1395 | 1395 | 1357 | 1530 | 518 | 991.77  | 138 | 137 | 138 | 136 | 141 | 141 | 138 | 138 | 140 |
| 670.52 | 489 | 1146 | 1137 | 1031 | 1384 | 1384 | 1347 | 1535 | 515 | 992.05  | 137 | 135 | 137 | 135 | 140 | 140 | 136 | 137 | 140 |
| 670.86 | 487 | 1145 | 1138 | 1028 | 1373 | 1373 | 1340 | 1533 | 517 | 992.34  | 140 | 133 | 138 | 135 | 139 | 139 | 136 | 139 | 142 |
| 671.2  | 489 | 1145 | 1133 | 1025 | 1374 | 1374 | 1340 | 1522 | 519 | 992.63  | 141 | 132 | 137 | 132 | 139 | 139 | 136 | 140 | 143 |
| 671.53 | 490 | 1139 | 1136 | 1035 | 1383 | 1383 | 1351 | 1520 | 523 | 992.91  | 141 | 132 | 137 | 131 | 137 | 137 | 138 | 140 | 143 |
| 671.87 | 491 | 1136 | 1138 | 1033 | 1392 | 1392 | 1350 | 1521 | 523 | 993.2   | 140 | 133 | 133 | 129 | 136 | 136 | 138 | 138 | 142 |
| 672.21 | 494 | 1143 | 1143 | 1030 | 1389 | 1389 | 1356 | 1528 | 528 | 993.49  | 144 | 142 | 137 | 136 | 143 | 143 | 145 | 143 | 145 |
| 672.55 | 492 | 1137 | 1136 | 1021 | 1380 | 1380 | 1342 | 1515 | 526 | 993.78  | 146 | 145 | 140 | 140 | 147 | 147 | 146 | 146 | 146 |
| 672.89 | 488 | 1139 | 1133 | 1026 | 1373 | 1373 | 1340 | 1514 | 525 | 994.06  | 146 | 145 | 141 | 142 | 147 | 147 | 146 | 148 | 147 |
| 673.23 | 489 | 1136 | 1126 | 1036 | 1371 | 1371 | 1336 | 1506 | 517 | 994.35  | 140 | 135 | 135 | 135 | 138 | 138 | 137 | 141 | 141 |
| 673.57 | 494 | 1147 | 1128 | 1045 | 1374 | 1374 | 1337 | 1517 | 519 | 994.64  | 138 | 130 | 133 | 131 | 132 | 132 | 135 | 139 | 137 |
| 673.9  | 493 | 1148 | 1125 | 1044 | 1374 | 1374 | 1335 | 1510 | 521 | 994.92  | 136 | 128 | 132 | 130 | 131 | 131 | 134 | 136 | 136 |
| 674.24 | 489 | 1145 | 1130 | 1034 | 1377 | 1377 | 1340 | 1522 | 519 | 995.21  | 137 | 128 | 132 | 129 | 132 | 132 | 135 | 136 | 136 |
| 674.58 | 485 | 1137 | 1123 | 1025 | 1373 | 1373 | 1344 | 1512 | 518 | 995.5   | 138 | 130 | 132 | 128 | 132 | 132 | 135 | 135 | 137 |
| 674.92 | 491 | 1138 | 1127 | 1025 | 1369 | 1369 | 1348 | 1507 | 518 | 995.78  | 137 | 130 | 129 | 126 | 131 | 131 | 135 | 134 | 136 |
| 675.26 | 492 | 1135 | 1125 | 1025 | 1359 | 1359 | 1347 | 1497 | 522 | 996.07  | 137 | 133 | 130 | 128 | 132 | 132 | 138 | 135 | 138 |
| 675.6  | 496 | 1133 | 1132 | 1028 | 1362 | 1362 | 1348 | 1506 | 522 | 996.35  | 139 | 136 | 133 | 133 | 140 | 140 | 143 | 141 | 144 |
| 675.93 | 493 | 1131 | 1131 | 1030 | 1367 | 1367 | 1350 | 1511 | 518 | 996.64  | 142 | 139 | 136 | 139 | 144 | 144 | 145 | 145 | 149 |
| 676.27 | 490 | 1129 | 1129 | 1031 | 1373 | 1373 | 1341 | 1502 | 516 | 996.93  | 143 | 138 | 135 | 139 | 144 | 144 | 143 | 146 | 147 |
| 676.61 | 485 | 1136 | 1116 | 1030 | 1370 | 1370 | 1343 | 1495 | 516 | 997.21  | 142 | 137 | 134 | 138 | 139 | 139 | 141 | 143 | 144 |
| 676.95 | 483 | 1132 | 1112 | 1025 | 1361 | 1361 | 1338 | 1499 | 511 | 997.5   | 142 | 134 | 133 | 135 | 138 | 138 | 138 | 141 | 142 |
| 677.29 | 487 | 1141 | 1111 | 1021 | 1353 | 1353 | 1338 | 1497 | 508 | 997.79  | 141 | 132 | 132 | 134 | 138 | 138 | 138 | 140 | 142 |
| 677.62 | 489 | 1128 | 1113 | 1016 | 1352 | 1352 | 1327 | 1495 | 506 | 998.07  | 137 | 129 | 129 | 131 | 136 | 136 | 136 | 137 | 140 |
| 677.96 | 488 | 1138 | 1114 | 1017 | 1358 | 1358 | 1324 | 1487 | 513 | 998.36  | 138 | 130 | 130 | 133 | 136 | 136 | 135 | 136 | 141 |
| 678.3  | 481 | 1129 | 1110 | 1008 | 1358 | 1358 | 1318 | 1490 | 515 | 998.64  | 139 | 131 | 131 | 137 | 138 | 138 | 135 | 135 | 141 |
| 678.64 | 480 | 1136 | 1115 | 1015 | 1356 | 1356 | 1325 | 1492 | 516 | 998.93  | 141 | 133 | 131 | 138 | 137 | 137 | 132 | 134 | 139 |
| 678.98 | 482 | 1132 | 1117 | 1018 | 1351 | 1351 | 1332 | 1490 | 516 | 999.22  | 140 | 134 | 130 | 135 | 134 | 134 | 132 | 134 | 137 |
| 679.31 | 484 | 1137 | 1123 | 1025 | 1348 | 1348 | 1340 | 1492 | 514 | 999.5   | 138 | 131 | 128 | 131 | 130 | 130 | 132 | 132 | 135 |
| 679.65 | 484 | 1137 | 1128 | 1031 | 1350 | 1350 | 1346 | 1490 | 515 | 999.79  | 139 | 130 | 129 | 130 | 129 | 129 | 134 | 133 | 137 |
| 679.99 | 483 | 1120 | 1118 | 1016 | 1340 | 1340 | 1334 | 1479 | 516 | 1000.07 | 140 | 129 | 129 | 130 | 131 | 131 | 134 | 134 | 138 |
| 680.33 | 483 | 1114 | 1117 | 1016 | 1347 | 1347 | 1329 | 1487 | 516 | 1000.36 | 139 | 130 | 130 | 128 | 132 | 132 | 134 | 136 | 137 |
| 680.66 | 484 | 1112 | 1108 | 1006 | 1339 | 1339 | 1320 | 1475 | 512 | 1000.64 | 137 | 127 | 128 | 126 | 130 | 130 | 134 | 135 | 135 |
| 681    | 481 | 1116 | 1109 | 1011 | 1349 | 1349 | 1322 | 1475 | 508 | 1000.93 | 137 | 127 | 127 | 127 | 131 | 131 | 135 | 133 | 134 |
| 681.34 | 480 | 1109 | 1098 | 1009 | 1342 | 1342 | 1314 | 1462 | 508 | 1001.21 | 137 | 125 | 127 | 127 | 132 | 132 | 133 | 131 | 132 |
| 681.68 | 478 | 1108 | 1097 | 1004 | 1343 | 1343 | 1308 | 1463 | 509 | 1001.5  | 140 | 129 | 130 | 130 | 136 | 136 | 135 | 134 | 134 |
| 682.01 | 481 | 1111 | 1100 | 1004 | 1337 | 1337 | 1305 | 1464 | 511 | 1001.79 | 139 | 131 | 131 | 130 | 135 | 135 | 134 | 137 | 136 |
| 682.35 | 479 | 1118 | 1100 | 1005 | 1331 | 1331 | 1307 | 1462 | 509 | 1002.07 | 141 | 135 | 133 | 134 | 138 | 138 | 139 | 141 | 140 |
| 682.69 | 478 | 1117 | 1100 | 1010 | 1336 | 1336 | 1318 | 1467 | 511 | 1002.36 | 142 | 135 | 134 | 133 | 138 | 138 | 138 | 140 | 141 |
| 683.02 | 474 | 1111 | 1088 | 1006 | 1341 | 1341 | 1315 | 1468 | 511 | 1002.64 | 143 | 136 | 134 | 132 | 138 | 138 | 137 | 138 | 142 |
| 683.36 | 472 | 1110 | 1089 | 1002 | 1344 | 1344 | 1315 | 1463 | 511 | 1002.93 | 143 | 136 | 133 | 131 | 136 | 136 | 136 | 138 | 142 |
| 683.7  | 469 | 1105 | 1086 | 1000 | 1334 | 1334 | 1298 | 1458 | 508 | 1003.21 | 142 | 134 | 134 | 133 | 136 | 136 | 138 | 140 | 142 |
| 684.04 | 466 | 1103 | 1085 | 1001 | 1329 | 1329 | 1298 | 1457 | 504 | 1003.5  | 140 | 133 | 135 | 134 | 137 | 137 | 141 | 141 | 142 |
| 684.37 | 467 | 1101 | 1082 | 999  | 1325 | 1325 | 1296 | 1456 | 506 | 1003.78 | 140 | 131 | 134 | 132 | 136 | 136 | 139 | 139 | 140 |
| 684.71 | 472 | 1098 | 1083 | 989  | 1322 | 1322 | 1297 | 1445 | 505 | 1004.07 | 139 | 130 | 132 | 130 | 134 | 134 | 136 | 136 | 138 |
| 685.05 | 479 | 1098 | 1084 | 987  | 1322 | 1322 | 1290 | 1435 | 505 | 1004.35 | 140 | 129 | 131 | 129 | 134 | 134 | 133 | 135 | 138 |
| 685.38 | 483 | 1092 | 1086 | 987  | 1318 | 1318 | 1292 | 1431 | 496 | 1004.64 | 139 | 127 | 130 | 128 | 133 | 133 |     |     |     |

|        |     |      |      |     |      |      |      |      |     |         |     |     |     |     |     |     |     |     |     |
|--------|-----|------|------|-----|------|------|------|------|-----|---------|-----|-----|-----|-----|-----|-----|-----|-----|-----|
| 689.76 | 463 | 1064 | 1059 | 956 | 1278 | 1278 | 1263 | 1422 | 488 | 1008.33 | 138 | 127 | 131 | 128 | 135 | 135 | 135 | 138 | 138 |
| 690.1  | 467 | 1062 | 1061 | 962 | 1282 | 1282 | 1265 | 1418 | 496 | 1008.61 | 136 | 126 | 129 | 128 | 135 | 135 | 133 | 137 | 138 |
| 690.43 | 466 | 1062 | 1059 | 957 | 1271 | 1271 | 1270 | 1411 | 497 | 1008.9  | 135 | 125 | 129 | 128 | 135 | 135 | 131 | 138 | 138 |
| 690.77 | 465 | 1051 | 1056 | 960 | 1261 | 1261 | 1270 | 1395 | 502 | 1009.18 | 137 | 126 | 130 | 131 | 133 | 133 | 131 | 137 | 139 |
| 691.11 | 463 | 1044 | 1050 | 953 | 1251 | 1251 | 1260 | 1395 | 496 | 1009.47 | 139 | 128 | 132 | 132 | 133 | 133 | 134 | 137 | 140 |
| 691.44 | 457 | 1044 | 1042 | 952 | 1256 | 1256 | 1249 | 1388 | 492 | 1009.75 | 139 | 130 | 133 | 133 | 134 | 134 | 136 | 136 | 140 |
| 691.78 | 454 | 1049 | 1039 | 951 | 1270 | 1270 | 1237 | 1385 | 489 | 1010.03 | 139 | 130 | 132 | 131 | 133 | 133 | 135 | 135 | 140 |
| 692.11 | 449 | 1045 | 1030 | 952 | 1268 | 1268 | 1238 | 1379 | 485 | 1010.32 | 137 | 129 | 131 | 128 | 131 | 131 | 134 | 135 | 139 |
| 692.45 | 454 | 1037 | 1024 | 951 | 1253 | 1253 | 1239 | 1369 | 483 | 1010.6  | 138 | 129 | 130 | 127 | 129 | 129 | 133 | 135 | 139 |
| 692.79 | 455 | 1029 | 1022 | 940 | 1241 | 1241 | 1239 | 1374 | 484 | 1010.88 | 140 | 130 | 130 | 130 | 131 | 131 | 135 | 135 | 140 |
| 693.12 | 457 | 1034 | 1031 | 937 | 1236 | 1236 | 1229 | 1369 | 484 | 1011.17 | 139 | 130 | 129 | 129 | 133 | 133 | 135 | 134 | 140 |
| 693.46 | 455 | 1031 | 1029 | 931 | 1233 | 1233 | 1225 | 1376 | 481 | 1011.45 | 140 | 130 | 130 | 129 | 134 | 134 | 136 | 134 | 141 |
| 693.79 | 454 | 1034 | 1026 | 940 | 1230 | 1230 | 1226 | 1371 | 475 | 1011.73 | 140 | 128 | 130 | 126 | 133 | 133 | 135 | 132 | 138 |
| 694.13 | 459 | 1032 | 1022 | 943 | 1228 | 1228 | 1229 | 1372 | 478 | 1012.02 | 139 | 128 | 130 | 127 | 133 | 133 | 132 | 131 | 137 |
| 694.46 | 462 | 1039 | 1015 | 946 | 1233 | 1233 | 1225 | 1363 | 484 | 1012.3  | 138 | 127 | 129 | 126 | 133 | 133 | 130 | 130 | 135 |
| 694.8  | 463 | 1031 | 1013 | 939 | 1233 | 1233 | 1218 | 1352 | 484 | 1012.58 | 136 | 125 | 126 | 126 | 132 | 132 | 129 | 130 | 135 |
| 695.14 | 458 | 1029 | 1013 | 928 | 1237 | 1237 | 1218 | 1355 | 480 | 1012.87 | 135 | 123 | 124 | 124 | 129 | 129 | 127 | 130 | 134 |
| 695.47 | 454 | 1029 | 1013 | 923 | 1238 | 1238 | 1221 | 1357 | 476 | 1013.15 | 135 | 123 | 124 | 123 | 126 | 126 | 126 | 129 | 134 |
| 695.81 | 454 | 1024 | 1009 | 921 | 1225 | 1225 | 1221 | 1349 | 474 | 1013.43 | 138 | 125 | 126 | 123 | 127 | 127 | 128 | 128 | 135 |
| 696.14 | 455 | 1021 | 1002 | 921 | 1219 | 1219 | 1210 | 1338 | 475 | 1013.71 | 136 | 124 | 125 | 123 | 124 | 124 | 126 | 127 | 135 |
| 696.48 | 453 | 1009 | 1001 | 922 | 1209 | 1209 | 1201 | 1326 | 472 | 1014    | 135 | 121 | 122 | 122 | 123 | 123 | 125 | 126 | 134 |
| 696.81 | 449 | 1013 | 998  | 919 | 1216 | 1216 | 1191 | 1330 | 472 | 1014.28 | 133 | 120 | 119 | 121 | 120 | 120 | 123 | 125 | 135 |
| 697.15 | 445 | 1003 | 989  | 913 | 1211 | 1211 | 1186 | 1324 | 469 | 1014.56 | 135 | 122 | 120 | 122 | 123 | 123 | 125 | 127 | 137 |
| 697.48 | 447 | 1006 | 991  | 913 | 1214 | 1214 | 1187 | 1330 | 471 | 1014.85 | 135 | 124 | 121 | 122 | 123 | 123 | 126 | 127 | 135 |
| 697.82 | 448 | 1005 | 986  | 910 | 1200 | 1200 | 1183 | 1328 | 472 | 1015.13 | 136 | 125 | 124 | 122 | 125 | 125 | 127 | 129 | 135 |
| 698.15 | 448 | 1003 | 987  | 908 | 1198 | 1198 | 1186 | 1330 | 470 | 1015.41 | 138 | 125 | 125 | 123 | 126 | 126 | 127 | 129 | 137 |
| 698.49 | 443 | 995  | 985  | 899 | 1191 | 1191 | 1182 | 1324 | 464 | 1015.69 | 139 | 125 | 125 | 123 | 128 | 128 | 127 | 129 | 138 |
| 698.83 | 439 | 989  | 985  | 891 | 1194 | 1194 | 1195 | 1314 | 463 | 1015.98 | 138 | 123 | 125 | 122 | 128 | 128 | 126 | 126 | 138 |
| 699.16 | 437 | 991  | 993  | 896 | 1185 | 1185 | 1187 | 1313 | 462 | 1016.26 | 136 | 121 | 124 | 122 | 128 | 128 | 126 | 127 | 137 |
| 699.5  | 443 | 994  | 990  | 898 | 1177 | 1177 | 1184 | 1311 | 466 | 1016.54 | 138 | 125 | 128 | 127 | 132 | 132 | 130 | 131 | 140 |
| 699.83 | 441 | 987  | 987  | 894 | 1170 | 1170 | 1176 | 1310 | 467 | 1016.82 | 140 | 127 | 129 | 130 | 134 | 134 | 133 | 135 | 142 |
| 700.17 | 443 | 980  | 976  | 887 | 1171 | 1171 | 1177 | 1307 | 470 | 1017.1  | 141 | 129 | 131 | 129 | 134 | 134 | 135 | 137 | 140 |
| 700.5  | 437 | 978  | 967  | 881 | 1175 | 1175 | 1174 | 1307 | 469 | 1017.39 | 140 | 129 | 132 | 128 | 134 | 134 | 136 | 138 | 139 |
| 700.84 | 441 | 977  | 969  | 883 | 1173 | 1173 | 1163 | 1306 | 465 | 1017.67 | 139 | 131 | 132 | 128 | 134 | 134 | 135 | 138 | 137 |
| 701.17 | 440 | 974  | 972  | 884 | 1171 | 1171 | 1164 | 1293 | 461 | 1017.95 | 140 | 134 | 135 | 132 | 137 | 137 | 137 | 140 | 140 |
| 701.51 | 438 | 967  | 971  | 878 | 1165 | 1165 | 1158 | 1283 | 457 | 1018.23 | 137 | 131 | 133 | 132 | 134 | 134 | 134 | 138 | 139 |
| 701.84 | 435 | 968  | 971  | 878 | 1164 | 1164 | 1156 | 1276 | 462 | 1018.51 | 137 | 128 | 129 | 131 | 131 | 131 | 132 | 135 | 138 |
| 702.17 | 430 | 962  | 965  | 867 | 1164 | 1164 | 1148 | 1270 | 458 | 1018.8  | 137 | 125 | 125 | 128 | 128 | 128 | 130 | 132 | 139 |
| 702.51 | 428 | 957  | 959  | 862 | 1151 | 1151 | 1136 | 1272 | 456 | 1019.08 | 136 | 122 | 122 | 123 | 125 | 125 | 129 | 129 | 136 |
